# Supplementary material for: Glutathione reductase deficiency alters lung development and hyperoxic responses in neonatal mice
Source: PubMed Central journal article supplement — Redox Biol. 2020 Nov 13;38:101797. doi: 10.1016/j.redox.2020.101797 (PMC7708869; doi:10.1016/j.redox.2020.101797), 2020-11-13
Supplement: mmc1.pdf [file mmc1.pdf]

Table S1. Lung genes (n=908) significantly different between wild-type (Gsr-WT) and glutathione reductase-deficient (Gsr-KO) mouse embryos at E19 (moderated t-test, p < 0.01).

Blue(-): fold lower in Gsr-KO. Red : fold higher in Gsr-KO.

| [C3H/HeN][raw] | [Gsr-KO][raw] | p [Corr]  | RefSeq Transcript ID  | FD     | Gene Symbol                       | Gene Title                                                                                                                                                                                                                                                                                                                                                                                                                                                                                                                                                                                                                                | Gene Ontology Biological Process                                                                                                                                                            |
|----------------|---------------|-----------|-----------------------|--------|-----------------------------------|-------------------------------------------------------------------------------------------------------------------------------------------------------------------------------------------------------------------------------------------------------------------------------------------------------------------------------------------------------------------------------------------------------------------------------------------------------------------------------------------------------------------------------------------------------------------------------------------------------------------------------------------|---------------------------------------------------------------------------------------------------------------------------------------------------------------------------------------------|
| 905.6041       | 27.324053     | 0.0090494 | NM_029562//NM_006521  | -32.87 | <b>Cyp2d26</b>                    | cytochrome P450, family 2, subfamily d, polypeptide 26                                                                                                                                                                                                                                                                                                                                                                                                                                                                                                                                                                                    | 0006805 // xenobiotic metabolic process // not recorded//0007565 // female pregnancy // inferred from electronic annotation//0019369 // arachidonic acid metabolic pr                       |
| 1424.7395      | 53.878025     | 0.0089693 | NM_001039555//NM_0061 | -35.90 | <b>Cyp2c68</b>                    | cytochrome P450, family 2, subfamily c, polypeptide 68                                                                                                                                                                                                                                                                                                                                                                                                                                                                                                                                                                                    | 0006805 // xenobiotic metabolic process // not recorded//0019373 // epoxigenase P450 pathway // not recorded//0042738 // exogenous drug catabolic process // not re                         |
| 2265.2947      | 103.28793     | 0.0020859 | NM_175628//NM_011241  | -21.63 | <b>A2m</b>                        | alpha-2-macroglobulin                                                                                                                                                                                                                                                                                                                                                                                                                                                                                                                                                                                                                     | 0001869 // negative regulation of complement activation, lectin pathway // not recorded//0007565 // female pregnancy // inferred from electronic annotation//0010466                        |
| 556.89984      | 28.522108     | 0.0097449 | NM_019775             | -19.54 | <b>Cpb2</b>                       | carboxypeptidase B2 (plasma)                                                                                                                                                                                                                                                                                                                                                                                                                                                                                                                                                                                                              | 0003311 // positive regulation of extracellular matrix constituent secretion // not recorded//0006508 // proteolysis // inferred from electronic annotation//0007596 // acute-phase respons |
| 247.28         | 13.300347     | 0.0098942 | NM_022884             | -18.58 | <b>Bhmt2</b>                      | betaine-homocysteine methyltransferase 2                                                                                                                                                                                                                                                                                                                                                                                                                                                                                                                                                                                                  | 0009086 // methionine biosynthetic process // not recorded//0003259 // methylation // inferred from electronic annotation//0055114 // 5-methylmethionine metabolic p                        |
| 467.52148      | 25.764864     | 0.0089772 | NM_001304800//NM_008  | -18.34 | <b>Hsd3b1</b>                     | hydroxy-delta-5-steroid dehydrogenase, 3 beta- and steroid delta-isomerase 1                                                                                                                                                                                                                                                                                                                                                                                                                                                                                                                                                              | 0006694 // steroid biosynthetic process // not recorded//0008152 // metabolic process // inferred from electronic annotation//0003477 // oxidation-reduction process //                     |
| 445.74228      | 28.955765     | 0.0097449 | NM_001277944//NM_001  | -15.45 | <b>Apoc2//Apoc4-apoc2</b>         | apolipoprotein C-II//Apoc4-Apoc2 readthrough                                                                                                                                                                                                                                                                                                                                                                                                                                                                                                                                                                                              | 0006629 // lipid metabolic process // inferred from electronic annotation//0006810 // transport // inferred from electronic annotation//0006869 // lipid transport // infer                 |
| 2766.6523      | 174.52327     | 0.0098942 | NM_010168//NM_011239  | -15.31 | <b>F2</b>                         | coagulation factor II                                                                                                                                                                                                                                                                                                                                                                                                                                                                                                                                                                                                                     | 0001934 // positive regulation of protein phosphorylation // not recorded//0006508 // proteolysis // inferred from electronic annotation//0006953 // acute-phase respons                    |
| 218.12827      | 17.254292     | 0.0089693 | NM_009244//NM_009247  | -12.92 | <b>Serpina1b//Serpina1e</b>       | SERP (or cysteine) peptidase inhibitor, clade A, member 1B//serine (or cysteine) pe                                                                                                                                                                                                                                                                                                                                                                                                                                                                                                                                                       | 0001701 // in utero embryonic development // inferred from mutant phenotype//0006487 // protein N-linked glycosylation // inferred from direct assay//0006953 // ac                         |
| 167.1455       | 13.147254     | 0.0099958 | NM_009467             | -12.76 | <b>Ugt2b5</b>                     | UDP glucuronosyltransferase 2 family, polypeptide B5                                                                                                                                                                                                                                                                                                                                                                                                                                                                                                                                                                                      | 0008152 // metabolic process // inferred from electronic annotation//0009813 // flavonoid biosynthetic process // not recorded//0032870 // cellular response to hormone                     |
| 140.85959      | 13.687359     | 0.0096679 |                       | -10.27 | <b>A195470</b>                    | expressed sequence A195470                                                                                                                                                                                                                                                                                                                                                                                                                                                                                                                                                                                                                |                                                                                                                                                                                             |
| 515.03235      | 54.43274      | 0.008943  | NM_133653//NM_006518  | -9.57  | <b>Mst1a</b>                      | methionine adenosyltransferase I, alpha                                                                                                                                                                                                                                                                                                                                                                                                                                                                                                                                                                                                   | 0006556 // s-adenosylmethionine biosynthetic process // not recorded//0006730 // one-carbon metabolic process // inferred from electronic annotation//0051260 // pro                        |
| 203.04868      | 22.982317     | 0.009631  | NM_007618             | -8.96  | <b>Serpine6</b>                   | serine (or cysteine) peptidase inhibitor, clade A, member 6                                                                                                                                                                                                                                                                                                                                                                                                                                                                                                                                                                               | 0006810 // transport // inferred from electronic annotation//0008211 // glucocorticoid metabolic process // inferred from mutant phenotype//0010951 // negative regula                      |
| 399.35556      | 45.383698     | 0.0089693 | NM_001109045//NM_007  | -8.94  | <b>Ang8</b>                       | angiotensinogen                                                                                                                                                                                                                                                                                                                                                                                                                                                                                                                                                                                                                           | 0006810 // regulation of blood vessel size by renin-angiotensin // inferred from mutant phenotype//0006833 // water transport // inferred from mutant phenotype // not recorded             |
| 911.0561       | 105.31718     | 0.0096878 | NM_008878             | -8.59  | <b>Serpinf2</b>                   | serine (or cysteine) peptidase inhibitor, clade F, member 2                                                                                                                                                                                                                                                                                                                                                                                                                                                                                                                                                                               | 0002034 // regulation of blood vessel size by renin-angiotensin // inferred from mutant phenotype//0006953 // acute-phase response // inferred from electronic annotation                   |
| 654.0267       | 76.74889      | 0.0090057 | NM_0118816            | -8.42  | <b>Apom</b>                       | apolipoprotein M                                                                                                                                                                                                                                                                                                                                                                                                                                                                                                                                                                                                                          | 0006810 // transport // inferred from electronic annotation//0006869 // lipid transport // inferred from electronic annotation//0009749 // response to glucose // inferred                  |
| 176.56389      | 21.89735      | 0.0085929 | NM_001291131//NM_001  | -8.14  | <b>Asgr1</b>                      | asialoglycoprotein receptor 1                                                                                                                                                                                                                                                                                                                                                                                                                                                                                                                                                                                                             | 0006897 // endocytosis // inferred from electronic annotation//0006898 // receptor-mediated endocytosis // not recorded//0031668 // cellular response to extracellular s                    |
| 238.05107      | 30.172365     | 0.0067139 | NM_008290//NM_006530  | -7.98  | <b>Hsd17b2</b>                    | hydroxy-steroid (17-beta) dehydrogenase 2                                                                                                                                                                                                                                                                                                                                                                                                                                                                                                                                                                                                 | 0001701 // in utero embryonic development // inferred from mutant phenotype//0001890 // placenta development // inferred from mutant phenotype//0006623 // lipid i                          |
| 167.2239       | 21.232779     | 0.0017344 | NM_205769             | -7.76  | <b>Crh</b>                        | corticotropin releasing hormone                                                                                                                                                                                                                                                                                                                                                                                                                                                                                                                                                                                                           | 0001934 // positive regulation of protein phosphorylation // not recorded//0001963 // synaptic transmission, dopaminergic // not recorded//0006704 // glucocorticoid bic                    |
| 296.46375      | 39.088787     | 7.20E-05  | NM_001111143          | -7.60  | <b>Cym</b>                        | chymosin                                                                                                                                                                                                                                                                                                                                                                                                                                                                                                                                                                                                                                  | 0006508 // proteolysis // not recorded//0030163 // protein catabolic process // not recorded                                                                                                |
| 797.0761       | 116.83812     | 1.35E-05  | NM_010344             | -6.80  | <b>Gsr</b>                        | glutathione reductase                                                                                                                                                                                                                                                                                                                                                                                                                                                                                                                                                                                                                     | 0006749 // glutathione metabolic process // inferred by curator//0006749 // glutathione metabolic process // not recorded//0007283 // spermatogenesis // not recorded//                     |
| 115.41196      | 18.958382     | 0.0095588 | NM_010001             | -6.08  | <b>Cyp2c37</b>                    | cytochrome P450, family 2, subfamily c, polypeptide 37                                                                                                                                                                                                                                                                                                                                                                                                                                                                                                                                                                                    | 0006805 // xenobiotic metabolic process // not recorded//0019373 // epoxigenase P450 pathway // not recorded//0042738 // exogenous drug catabolic process // not re                         |
| 382.43787      | 65.28365      | 0.0089693 | NM_032540//NM_006506  | -5.93  | <b>Kel</b>                        | cell blood group                                                                                                                                                                                                                                                                                                                                                                                                                                                                                                                                                                                                                          | 0006508 // proteolysis // inferred from electronic annotation//0006874 // cellular calcium ion homeostasis // inferred from genetic interaction//0008361 // regulation of IC                |
| 278.97556      | 51.960957     | 0.0099126 | NM_145146             | -5.43  | <b>Afm</b>                        | afamin                                                                                                                                                                                                                                                                                                                                                                                                                                                                                                                                                                                                                                    | 0006810 // transport // inferred from electronic annotation//0051180 // vitamin transport // not recorded                                                                                   |
| 119.14806      | 41.986256     | 0.008832  | NM_001012306//NM_001  | -5.28  | <b>Hsd3b2//Hsd3b3//Hsd3b6</b>     | hydroxy-delta-5-steroid dehydrogenase, 3 beta- and steroid delta-isomerase 2//hyd                                                                                                                                                                                                                                                                                                                                                                                                                                                                                                                                                         | 0006694 // steroid biosynthetic process // inferred from electronic annotation//0008152 // metabolic process // inferred from electronic annotation//0055114 // oxidatio                    |
| 1808.1936      | 388.49655     | 0.0063393 | NM_008469             | -4.72  | <b>Krt15</b>                      | keratin 15                                                                                                                                                                                                                                                                                                                                                                                                                                                                                                                                                                                                                                | 0008779 // mitophagy in response to mitochondrial depolarization // not recorded                                                                                                            |
| 238.20706      | 51.728527     | 0.0094153 | NM_008243//NM_006511  | -4.64  | <b>Mst1</b>                       | macrose stimulating 1 (hepatocyte growth factor-like)                                                                                                                                                                                                                                                                                                                                                                                                                                                                                                                                                                                     | 0006508 // proteolysis // inferred from electronic annotation//0007283 // spermatogenesis // inferred from electronic annotation//0007566 // embryo implantation // inf                     |
| 414.3533       | 102.813614    | 0.0075335 | NM_001122683//NM_175  | -4.40  | <b>Bdh1</b>                       | 3-hydroxybutyrate dehydrogenase, type 1                                                                                                                                                                                                                                                                                                                                                                                                                                                                                                                                                                                                   | 0008152 // metabolic process // inferred from electronic annotation//0055114 // oxidation-reduction process // not recorded                                                                 |
| 540.4503       | 128.9482      | 0.008644  | NM_008156//NM_011244  | -4.22  | <b>Gpld1</b>                      | glycosylphosphatidylinositol specific phospholipase D1                                                                                                                                                                                                                                                                                                                                                                                                                                                                                                                                                                                    | 0001503 // ossification // inferred from expression pattern//0002042 // cell migration involved in sprouting angiogenesis // not recorded//0002062 // chondrocyte differer                  |
| 14453.229      | 3323.1257     | 0.0081374 | NM_001177544//NM_178  | -4.20  | <b>Hist1h2aa//Hist1h2ap</b>       | histone cluster 1, H2a//histone cluster 1, H2ap                                                                                                                                                                                                                                                                                                                                                                                                                                                                                                                                                                                           | 0006629 // chromatin organization // not recorded//0006342 // chromatin silencing // not recorded//0008285 // negative regulation of cell proliferation // not record                       |
| 292.10898      | 70.59229      | 0.0085929 | NM_001290011//NM_001  | -4.15  | <b>Pemt</b>                       | phosphatidylethanolamine N-methyltransferase                                                                                                                                                                                                                                                                                                                                                                                                                                                                                                                                                                                              | 0006625 // lipid metabolic process // inferred from electronic annotation//0006644 // phospholipid metabolic process // inferred from electronic annotation//0006650 // i                   |
| 309.9616       | 75.63072      | 0.009037  | NM_133686             | -4.13  | <b>Qprt</b>                       | quinolate phosphoribosyltransferase                                                                                                                                                                                                                                                                                                                                                                                                                                                                                                                                                                                                       | 0009435 // NAD biosynthetic process // not recorded//0019363 // pyridine nucleotide biosynthetic process // inferred from electronic annotation//0034213 // quinolinate                     |
| 127.1686       | 13.112123     | 0.0096679 | NM_153193//NM_006501  | -4.12  | <b>Hsd3b2//Hsd3b3//Hsd3b6</b>     | hydroxy-delta-5-steroid dehydrogenase, 3 beta- and steroid delta-isomerase 2//hyd                                                                                                                                                                                                                                                                                                                                                                                                                                                                                                                                                         | 0006694 // steroid biosynthetic process // inferred from electronic annotation//0008152 // metabolic process // inferred from electronic annotation//0055114 // oxidatio                    |
| 106.652466     | 27.08468      | 0.0068697 | NM_008260             | -4.00  | <b>Foxa3</b>                      | forkhead box A3                                                                                                                                                                                                                                                                                                                                                                                                                                                                                                                                                                                                                           | 0001678 // cellular glucose homeostasis // inferred from mutant phenotype//0006351 // transcription, DNA-templated // inferred from electronic annotation//0006355 //                       |
| 293.85028      | 74.839554     | 0.0090012 | NM_030703//NM_011247  | -3.98  | <b>Cpn1</b>                       | carboxypeptidase N, polypeptide 1                                                                                                                                                                                                                                                                                                                                                                                                                                                                                                                                                                                                         | 0006508 // proteolysis // not recorded//0006518 // peptide metabolic process // --//0010815 // bradykinin-catabolic process // not recorded//0016485 // protein process                     |
| 269.92487      | 75.49332      | 0.0089066 | NM_009034             | -3.59  | <b>Rbp2</b>                       | retinol binding protein 2, cellular                                                                                                                                                                                                                                                                                                                                                                                                                                                                                                                                                                                                       | 0001523 // retinoid metabolic process // traceable author statement//0006776 // vitamin A metabolic process // inferred from electronic annotation//0006810 // transport                    |
| 952.7804       | 282.42905     | 0.0017344 | NM_001291128//NM_001  | -3.44  | <b>Nnat</b>                       | neuronal                                                                                                                                                                                                                                                                                                                                                                                                                                                                                                                                                                                                                                  | 0007275 // retinoid organismal development // inferred from electronic annotation//0007420 // brain development // inferred from electronic annotation//0009749 //                          |
| 96.26743       | 28.237905     | 0.0090404 | NM_138595             | -3.44  | <b>Glic</b>                       | glycine decarboxylase                                                                                                                                                                                                                                                                                                                                                                                                                                                                                                                                                                                                                     | 0006520 // cellular amino acid metabolic process // inferred from electronic annotation//0006544 // glycine metabolic process // inferred from electronic annotation//000                   |
| 188.70776      | 55.884327     | 0.0029632 | NM_001480210//NM_0065 | -3.43  | <b>BC005512//Gm29673//Gm</b>      | RIKEN cDNA BC005512//predicted gene, 29673//predicted gene 6958                                                                                                                                                                                                                                                                                                                                                                                                                                                                                                                                                                           |                                                                                                                                                                                             |
| 103.52489      | 21.22533      | 0.0099254 | NM_001161355//NM_001  | -3.35  | <b>Tmd2</b>                       | T cell immunoglobulin and mucin domain containing 2                                                                                                                                                                                                                                                                                                                                                                                                                                                                                                                                                                                       |                                                                                                                                                                                             |
| 113.84464      | 55.278667     | 0.0087842 | NM_001305992//NM_008  | -3.25  | <b>Ggt1</b>                       | gamma-glutamyltransferase 1                                                                                                                                                                                                                                                                                                                                                                                                                                                                                                                                                                                                               | 0002682 // regulation of immune system process // inferred from mutant phenotype//0006508 // proteolysis // inferred from electronic annotation//0006536 // glutamat                        |
| 558.37537      | 179.16898     | 0.0086932 | NM_001217129//NM_009  | -3.20  | <b>Tk1</b>                        | thymidine kinase 1                                                                                                                                                                                                                                                                                                                                                                                                                                                                                                                                                                                                                        | 0001889 // liver development // inferred from electronic annotation//0009157 // deoxyribonucleoside monophosphate biosynthetic process // inferred from direct assay//                      |
| 1139.0332      | 361.4583      | 0.002626  | NM_026515//NR_379450  | -3.18  | <b>2810417H13R1K</b>              | RIKEN cDNA 2810417H13R1K gene                                                                                                                                                                                                                                                                                                                                                                                                                                                                                                                                                                                                             | 0006260 // DNA replication // not recorded//0006281 // DNA repair // inferred from electronic annotation//0006974 // cellular response to DNA damage stimulus // not r                      |
| 1181.2656      | 375.74295     | 0.0012309 | NM_001252627//NM_001  | -3.17  | <b>Cdh16</b>                      | cadherin 16                                                                                                                                                                                                                                                                                                                                                                                                                                                                                                                                                                                                                               | 0007155 // cell adhesion // inferred from electronic annotation//0007156 // homophilic cell adhesion via plasma membrane adhesion molecules // DNA inferred from electronic                 |
| 380.86133      | 119.52265     | 0.0080529 | NM_019538//NM_006541  | -3.16  | <b>Plac1</b>                      | placental specific protein 1                                                                                                                                                                                                                                                                                                                                                                                                                                                                                                                                                                                                              | 0001890 // placenta development // inferred from expression pattern//0001890 // placenta development // inferred from electronic annotation//0007275 // multicelluar                        |
| 1602.6293      | 508.9842      | 0.0086932 | NM_001110251//NM_013  | -3.15  | <b>Hmbs</b>                       | hydroxymethylbilane synthase                                                                                                                                                                                                                                                                                                                                                                                                                                                                                                                                                                                                              | 0001666 // response to hypoxia // inferred from electronic annotation//0006779 // porphyrin-containing compound biosynthetic process // inferred from electronic annota                     |
| 281.24805      | 88.69928      | 0.0058237 | NM_001025779//NM_011  | -3.14  | <b>Cdc6</b>                       | cell division cycle 6                                                                                                                                                                                                                                                                                                                                                                                                                                                                                                                                                                                                                     | 0006260 // DNA replication // inferred from electronic annotation//0006270 // DNA replication initiation // inferred from electronic annotation//0007049 // cell cycle // in                |
| 508.85938      | 176.28032     | 0.0080529 | NM_0013548//NM_013550 | -2.97  | <b>Hist1h3a//Hist1h3b//Hist1</b>  | histone cluster 1, H3a//histone cluster 1, H3b//histone cluster 1, H3c//histone cluster 1, H3d//histone cluster 1, H3e//histone cluster 1, H3f//histone cluster 1, H3g//histone cluster 1, H3i//histone cluster 1, H3j//histone cluster 1, H3k//histone cluster 1, H3l//histone cluster 1, H3m//histone cluster 1, H3n//histone cluster 1, H3o//histone cluster 1, H3p//histone cluster 1, H3q//histone cluster 1, H3r//histone cluster 1, H3s//histone cluster 1, H3t//histone cluster 1, H3u//histone cluster 1, H3v//histone cluster 1, H3w//histone cluster 1, H3x//histone cluster 1, H3y//histone cluster 1, H3z//histone cluster 1 |                                                                                                                                                                                             |
| 2075.968       | 715.2055      | 0.0051715 | NM_008185//NM_006513  | -2.88  | <b>Gstt1</b>                      | glutathione S-transferase, theta 1                                                                                                                                                                                                                                                                                                                                                                                                                                                                                                                                                                                                        | 0000122 // negative regulation of transcription from RNA polymerase II promoter // inferred from direct assay//0000183 // chromatin silencing at rDNA // traceable author                   |
| 141.70409      | 57.50415      | 0.0063203 | NM_0082039            | -2.81  | <b>Esco2</b>                      | establishment of cohesion 1 homolog 2 (S. cerevisiae)                                                                                                                                                                                                                                                                                                                                                                                                                                                                                                                                                                                     | 0006304 // DNA modification // not recorded//0006749 // glutathione metabolic process // inferred from direct assay//0006749 // glutathione metabolic process // infer                      |
| 321.0904       | 116.72456     | 0.0076866 | NM_011976//NR_386476  | -2.76  | <b>Sema04g</b>                    | sema domain, immunoglobulin domain (Ig), transmembrane domain (TM) and short                                                                                                                                                                                                                                                                                                                                                                                                                                                                                                                                                              | 0001755 // neural crest cell migration // not recorded//0007275 // multicellular organismal development // inferred from electronic annotation//0007399 // nervous syst                     |
| 1009.33734     | 378.059       | 0.0046248 | NM_001012272//NM_001  | -2.69  | <b>Birc5</b>                      | baculoviral IAP repeat-containing 5                                                                                                                                                                                                                                                                                                                                                                                                                                                                                                                                                                                                       | 0000086 // G2/M transition of mitotic cell cycle // not recorded//0000226 // microtubule cytoskeleton organization // inferred from mutant phenotype//0000910 // cytoki                     |
| 485.58954      | 180.9112      | 0.0087842 | NM_008698//NM_006514  | -2.68  | <b>Nipsnap1</b>                   | 4-nitrophenylphosphate domain and non-neuronal SNAP25-like protein homolog 1                                                                                                                                                                                                                                                                                                                                                                                                                                                                                                                                                              | 0019233 // sensory perception of pain // inferred from mutant phenotype                                                                                                                     |
| 747.8198       | 282.82642     | 0.003657  | NM_001302540//NM_008  | -2.66  | <b>Mcm5</b>                       | minichromosome maintenance deficient 5, cell division cycle 46 (S. cerevisiae)                                                                                                                                                                                                                                                                                                                                                                                                                                                                                                                                                            | 0006260 // DNA replication // inferred from electronic annotation//0006270 // DNA replication initiation // inferred from electronic annotation//0007049 // cell cycle // in                |
| 546.5247       | 216.97443     | 0.0065464 | NM_009903             | -2.61  | <b>Cldn4</b>                      | claudin 4                                                                                                                                                                                                                                                                                                                                                                                                                                                                                                                                                                                                                                 | 0007565 // female pregnancy // inferred from electronic annotation//0007623 // circadian rhythm // inferred from electronic annotation//0016338 // calcium-indepen                          |
| 104.69458      | 40.579697     | 0.0089567 | NM_001033264//NM_001  | -2.61  | <b>Gls2</b>                       | glutaminase 2 (liver, mitochondrial)                                                                                                                                                                                                                                                                                                                                                                                                                                                                                                                                                                                                      | 0006537 // L-serine biosynthetic process // not recorded//0006541 // glutamine metabolic process // inferred from electronic annotation//0006543 // glutamine catabo                        |
| 3438.888       | 1293.1224     | 0.0075737 | NM_001081117//NM_006  | -2.59  | <b>Mki67</b>                      | antigen identified by monoclonal antibody Ki 67                                                                                                                                                                                                                                                                                                                                                                                                                                                                                                                                                                                           | 0006259 // DNA metabolic process // inferred from electronic annotation//0007126 // meiotic nuclear division // inferred from direct assay//0000283 // cell proliferation /                 |
| 617.7388       | 238.86847     | 0.0089693 | NM_016966//NR_076393  | -2.58  | <b>Gm6756//Phgdh</b>              | 3-phosphoglycerate dehydrogenase pseudogene //3-phosphoglycerate dehydrogena                                                                                                                                                                                                                                                                                                                                                                                                                                                                                                                                                              | 0006541 // glutamine metabolic process // inferred from mutant phenotype//0006544 // glycine metabolic process // inferred from mutant phenotype//0006563 // L-seri                         |
| 314.12036      | 125.28604     | 0.0063393 | NM_172505//NM_198652  | -2.56  | <b>6430706D22R1K//A730008H</b>    | RIKEN cDNA 6430706D22 gene//RIKEN cDNA A730008H23 gene//Holliday junction                                                                                                                                                                                                                                                                                                                                                                                                                                                                                                                                                                 | 0007049 // cell cycle // inferred from electronic annotation//0007059 // chromosome segregation // not recorded//0034080 // CENP-A containing nucleosome assembly //                        |
| 154.00896      | 60.946278     | 0.0084703 | NM_133995             | -2.55  | <b>Ubp1</b>                       | ureidopropionase, beta                                                                                                                                                                                                                                                                                                                                                                                                                                                                                                                                                                                                                    | 0001889 // liver development // not recorded//0006807 // nitrogen compound metabolic process // inferred from mutant phenotype//0008152 // metabolic process //                             |
| 65.52462       | 25.925991     | 0.0048754 | NM_021886//NM_006517  | -2.55  | <b>Cenph</b>                      | centromere protein H                                                                                                                                                                                                                                                                                                                                                                                                                                                                                                                                                                                                                      | 0007059 // chromosome segregation // not recorded//0007067 // mitotic nuclear division // not recorded//0051382 // kinetochore assembly // inferred from electronic a                       |
| 508.1461       | 201.18913     | 0.0040953 | NM_00111078//NM_001   | -2.52  | <b>Uhrf1</b>                      | ubiquitin-like, containing PHD and RING finger domains, 1                                                                                                                                                                                                                                                                                                                                                                                                                                                                                                                                                                                 | 0000122 // negative regulation of transcription from RNA polymerase II promoter // inferred from direct assay//0000122 // negative regulation of transcription from RNA p                   |
| 371.50165      | 148.30985     | 0.002626  | NM_011496//NM_006532  | -2.52  | <b>Aurkb</b>                      | aurora kinase B                                                                                                                                                                                                                                                                                                                                                                                                                                                                                                                                                                                                                           | 0000122 // negative regulation of transcription from RNA polymerase II promoter // not recorded//0002903 // negative regulation of B cell apoptotic process // not record                   |
| 1818.8318      | 277.27985     | 0.0076944 | NM_009104             | -2.50  | <b>Rrm2</b>                       | ribonucleotide reductase 2                                                                                                                                                                                                                                                                                                                                                                                                                                                                                                                                                                                                                | 0006260 // DNA replication // inferred from electronic annotation//0009186 // deoxyribonucleoside diphosphate metabolic process // inferred from electronic annotation//                    |
| 392.26077      | 159.18124     | 0.0035996 | NM_178683//NM_006517  | -2.50  | <b>Depdc1b</b>                    | DEP domain containing 1B                                                                                                                                                                                                                                                                                                                                                                                                                                                                                                                                                                                                                  | 0007165 // signal transduction // inferred from electronic annotation//0016477 // cell migration // not recorded//0030177 // positive regulation of Wnt signaling pathway                   |
| 279.2767       | 113.36384     | 0.008644  | NM_013548//NM_145073  | -2.49  | <b>Hist1h3a//Hist1h3f//Hist1h</b> | histone cluster 1, H3a//histone cluster 1, H3f//histone cluster 1, H3g//histone cluster 1, H3h//histone cluster 1, H3i//histone cluster 1, H3j//histone cluster 1, H3k//histone cluster 1, H3l//histone cluster 1, H3m//histone cluster 1, H3n//histone cluster 1, H3o//histone cluster 1, H3p//histone cluster 1, H3q//histone cluster 1, H3r//histone cluster 1, H3s//histone cluster 1, H3t//histone cluster 1, H3u//histone cluster 1, H3v//histone cluster 1, H3w//histone cluster 1, H3x//histone cluster 1, H3y//histone cluster 1, H3z//histone cluster 1                                                                         |                                                                                                                                                                                             |
| 179.56654      | 71.97339      | 0.0017344 | NM_007634//NM_006523  | -2.49  | <b>Cnrf</b>                       | cyclin F                                                                                                                                                                                                                                                                                                                                                                                                                                                                                                                                                                                                                                  | 0000183 // chromatin silencing at rDNA // traceable author statement//0002230 // positive regulation of defense response to virus by host // not recorded//0006334 // nu                    |
| 2582.6367      | 1037.7747     | 0.0057447 | NM_0118187            | -2.49  | <b>Gadd45g</b>                    | growth arrest and DNA-damage-inducible 45 gamma                                                                                                                                                                                                                                                                                                                                                                                                                                                                                                                                                                                           | 0000320 // re-entry into mitotic cell cycle // inferred from mutant phenotype//0001890 // placenta development // inferred from mutant phenotype//0007049 // cell cycle                     |
| 1772.6205      | 714.39276     | 0.004449  | NM_001205339//NM_177  | -2.47  | <b>Psat1</b>                      | phosphoserine aminotransferase 1                                                                                                                                                                                                                                                                                                                                                                                                                                                                                                                                                                                                          | 0000185 // activation of MAPKKK activity // not recorded//0000186 // activation of MAPKK activity // inferred from direct assay//0006465 // negative regulation of protein                  |
| 607.43964      | 254.67839     | 0.0098942 | NM_001302139//NM_001  | -2.44  | <b>Cenpa</b>                      | centromere protein A                                                                                                                                                                                                                                                                                                                                                                                                                                                                                                                                                                                                                      | 0006564 // L-serine biosynthetic process // inferred from electronic annotation//0008152 // metabolic process // inferred from electronic annotation//0008652 // cellular                   |
| 1361.0616      | 560.9477      | 0.0046722 | NM_009828             | -2.44  | <b>Cnna2</b>                      | cyclin A2                                                                                                                                                                                                                                                                                                                                                                                                                                                                                                                                                                                                                                 | 0000132 // establishment of mitotic spindle orientation // not recorded//0051382 // kinetochore assembly // not recorded//0071459 // protein localization to chromosom                      |
| 288.41794      | 120.441124    | 0.0083164 | NM_178203//NM_178206  | -2.42  | <b>Hist1h3b//Hist1h3h//Hist1h</b> | histone cluster 1, H3b//histone cluster 1, H3h//histone cluster                                                                                                                                                                                                                                                                                                                                                                                                                                                                                                                                                                           |                                                                                                                                                                                             |



| [C3H/HeN][raw] | [Gsr-KO][raw] | p [Corr]  | RefSeq Transcript ID     | FD    | Gene Symbol                       | Gene Title                                                                        | Gene Ontology Biological Process                                                                                                                                                                                                                                                                                                                                                                                                                                                                                                                                                                                                                                                                                                                                                                                                                                                                                                                                                                                                                                                                                                                                                                                                                                                                                                                                                                                                                                                                                                                                    |
|----------------|---------------|-----------|--------------------------|-------|-----------------------------------|-----------------------------------------------------------------------------------|---------------------------------------------------------------------------------------------------------------------------------------------------------------------------------------------------------------------------------------------------------------------------------------------------------------------------------------------------------------------------------------------------------------------------------------------------------------------------------------------------------------------------------------------------------------------------------------------------------------------------------------------------------------------------------------------------------------------------------------------------------------------------------------------------------------------------------------------------------------------------------------------------------------------------------------------------------------------------------------------------------------------------------------------------------------------------------------------------------------------------------------------------------------------------------------------------------------------------------------------------------------------------------------------------------------------------------------------------------------------------------------------------------------------------------------------------------------------------------------------------------------------------------------------------------------------|
| 1079.798       | 600.12305     | 0.0071653 | NM_010721                | -1.82 | <b>Lmnb1</b>                      | lamin B1                                                                          | 0031662 // positive regulation of cyclin-dependent protein serine/threonine kinase activity involved in G2/M transition of mitotic cell cycle // non-traceable author statement                                                                                                                                                                                                                                                                                                                                                                                                                                                                                                                                                                                                                                                                                                                                                                                                                                                                                                                                                                                                                                                                                                                                                                                                                                                                                                                                                                                     |
| 244.46936      | 132.68498     | 0.0097449 | NM_011234                | -1.82 | <b>Rad51</b>                      | RAD51 homolog                                                                     | 0000724 // double-strand break repair via homologous recombination // inferred from direct assay // 0000724 // double-strand break repair via homologous recombination, 0000728 // mitotic cell cycle // not recorded // 0007018 // microtubule-based movement // not recorded // 0007049 // cell cycle // inferred from electronic annotation // 0007015 // actin filament organization // not recorded // 0007264 // microtubule signal transduction // inferred from electronic annotation                                                                                                                                                                                                                                                                                                                                                                                                                                                                                                                                                                                                                                                                                                                                                                                                                                                                                                                                                                                                                                                                       |
| 325.85416      | 177.58089     | 0.0083164 | NM_173762                | -1.82 | <b>Cenpe</b>                      | centromere protein E                                                              |                                                                                                                                                                                                                                                                                                                                                                                                                                                                                                                                                                                                                                                                                                                                                                                                                                                                                                                                                                                                                                                                                                                                                                                                                                                                                                                                                                                                                                                                                                                                                                     |
| 280.84192      | 156.38338     | 0.0030958 | NM_175092                | -1.81 | <b>Rhof</b>                       | ras homolog gene family, member f                                                 |                                                                                                                                                                                                                                                                                                                                                                                                                                                                                                                                                                                                                                                                                                                                                                                                                                                                                                                                                                                                                                                                                                                                                                                                                                                                                                                                                                                                                                                                                                                                                                     |
| 141.25345      | 77.62626      | 0.0056196 | NM_001310502 // NM_172   | -1.81 | <b>Ankle1</b>                     | ankyrin repeat and LEM domain containing 1                                        |                                                                                                                                                                                                                                                                                                                                                                                                                                                                                                                                                                                                                                                                                                                                                                                                                                                                                                                                                                                                                                                                                                                                                                                                                                                                                                                                                                                                                                                                                                                                                                     |
| 266.02588      | 144.89935     | 0.008644  | NM_008644 // NM_0112466  | -1.81 | <b>Sgol1</b>                      | shogunin-like 1 (S. pombe)                                                        | 0007049 // cell cycle // inferred from electronic annotation // 0007059 // chromosome segregation // not recorded // 0007067 // mitotic nuclear division // inferred from electronic annotation // 0006810 // transport // inferred from electronic annotation // 0006811 // ion transport // inferred from electronic annotation // 0006821 // chloride transport // inferred from electronic annotation // 0003070 // heart morphogenesis // traceable author statement // 0007165 // signal transduction // inferred from direct assay // 0007204 // positive regulation of cytosolic c // 0006470 // protein dephosphorylation // not recorded // 0007049 // cell cycle // inferred from electronic annotation // 00016311 // dephosphorylation // -- // 00023052 // sig // 0030041 // actin filament polymerization // inferred from mutant phenotype // 0030041 // actin filament polymerization // not recorded // 0031175 // neuron projection development // 0007018 // microtubule-based movement // not recorded // 0007019 // cell cycle // inferred from electronic annotation // 0000700 // mitotic sister chromatid segregation // not recorded // 0007013 // microtubule depolymerization // not recorded // 0007049 // cell cycle // inferred from electronic annotation // 0000700 // mitotic sister chromatid segregation // not recorded // 0001032 // establishment of mitotic spindle orientation // not recorded // 0007049 // cell cycle // inferred from electronic annotation // 0042168 // heme metabolic process // inferred by curator |
| 2471.4858      | 1356.2666     | 0.0093457 | NM_0135446 // NM_0112411 | -1.79 | <b>Hebp1</b>                      | heme binding protein 1                                                            | 0042552 // myelination // not recorded // 15902043 // positive regulation of extrinsic apoptotic signaling pathway via death domain receptors // inferred from direct assay                                                                                                                                                                                                                                                                                                                                                                                                                                                                                                                                                                                                                                                                                                                                                                                                                                                                                                                                                                                                                                                                                                                                                                                                                                                                                                                                                                                         |
| 2314.4055      | 1279.117      | 0.0042446 | NM_001171187 // NM_010   | -1.78 | <b>Mpl</b>                        | myelin and lymphocyte protein, T cell differentiation protein                     | 0006915 // apoptotic process // inferred from electronic annotation // 0007049 // cell cycle // inferred from electronic annotation // 0007067 // mitotic nuclear division // in                                                                                                                                                                                                                                                                                                                                                                                                                                                                                                                                                                                                                                                                                                                                                                                                                                                                                                                                                                                                                                                                                                                                                                                                                                                                                                                                                                                    |
| 238.49878      | 133.22519     | 0.0065811 | NM_001141975 // NM_001   | -1.78 | <b>Tpx2</b>                       | TPX2, microtubule-associated protein homolog (Xenopus laevis)                     | 0000079 // regulation of cyclin-dependent protein serine/threonine kinase activity // inferred from direct assay // 0001836 // release of cytochrome c from mitochondria // r                                                                                                                                                                                                                                                                                                                                                                                                                                                                                                                                                                                                                                                                                                                                                                                                                                                                                                                                                                                                                                                                                                                                                                                                                                                                                                                                                                                       |
| 110.138535     | 61.08116      | 0.0090044 | NM_018754                | -1.78 | <b>Sfn</b>                        | stratfin                                                                          | 0000070 // mitotic sister chromatid segregation // inferred from mutant phenotype // 0007049 // cell cycle // inferred from electronic annotation // 0007067 // mitotic nuclear                                                                                                                                                                                                                                                                                                                                                                                                                                                                                                                                                                                                                                                                                                                                                                                                                                                                                                                                                                                                                                                                                                                                                                                                                                                                                                                                                                                     |
| 663.7102       | 382.0576      | 0.0087756 | NM_019499 // NM_006506   | -1.76 | <b>Msd21l</b>                     | MAD2 mitotic arrest deficient-like 1                                              | 0007049 // cell cycle // inferred from electronic annotation // 0007067 // mitotic nuclear division // inferred from electronic annotation // 00051301 // cell division // inferred                                                                                                                                                                                                                                                                                                                                                                                                                                                                                                                                                                                                                                                                                                                                                                                                                                                                                                                                                                                                                                                                                                                                                                                                                                                                                                                                                                                 |
| 75.18874       | 42.93687      | 0.0084703 | NM_001042653 // NM_011   | -1.76 | <b>LOC100862416 // LOC100862</b>  | protein Mts18-beta-like // Opa interacting protein 5                              | 0007049 // cell cycle // inferred from electronic annotation // 0007067 // mitotic nuclear division // inferred from electronic annotation // 0007088 // regulation of mitotic n                                                                                                                                                                                                                                                                                                                                                                                                                                                                                                                                                                                                                                                                                                                                                                                                                                                                                                                                                                                                                                                                                                                                                                                                                                                                                                                                                                                    |
| 214.85017      | 122.0136      | 0.002626  | NM_175265 // NM_006519   | -1.76 | <b>Bora</b>                       | bora, aurora kinase A activator                                                   | 0000070 // mitotic sister chromatid segregation // not recorded // 0000278 // mitotic cell cycle // not recorded // 0007018 // microtubule-based movement // not recorded //                                                                                                                                                                                                                                                                                                                                                                                                                                                                                                                                                                                                                                                                                                                                                                                                                                                                                                                                                                                                                                                                                                                                                                                                                                                                                                                                                                                        |
| 289.10873      | 162.40288     | 0.0063393 | NM_197959 // NM_011249   | -1.75 | <b>Kif18b</b>                     | kinessin family member 18B                                                        | 0006351 // transcription, DNA-templated // inferred from electronic annotation // 0006355 // regulation of transcription, DNA-templated // inferred from electronic annotat                                                                                                                                                                                                                                                                                                                                                                                                                                                                                                                                                                                                                                                                                                                                                                                                                                                                                                                                                                                                                                                                                                                                                                                                                                                                                                                                                                                         |
| 89.550385      | 15.170246     | 0.0093601 | NM_008652 // NM_006498   | -1.75 | <b>Mybl2</b>                      | myeloblastosis oncogene-like 2                                                    | 0000380 // alternative mRNA splicing, via spliceosome // inferred from direct assay // 0006397 // mRNA processing // inferred from electronic annotation // 0006810 // trans                                                                                                                                                                                                                                                                                                                                                                                                                                                                                                                                                                                                                                                                                                                                                                                                                                                                                                                                                                                                                                                                                                                                                                                                                                                                                                                                                                                        |
| 3723.599       | 2118.052      | 0.0085929 | NM_001039129 // NM_001   | -1.75 | <b>Gm10052 // Gm5803 // Hnmrg</b> | heterogeneous nuclear ribonucleoprotein A1 pseudogene // predicted gene 5803 // h |                                                                                                                                                                                                                                                                                                                                                                                                                                                                                                                                                                                                                                                                                                                                                                                                                                                                                                                                                                                                                                                                                                                                                                                                                                                                                                                                                                                                                                                                                                                                                                     |
| 189.54427      | 108.06164     | 0.0085929 | NM_001162998             | -1.74 | <b>Smm16</b>                      | small integral membrane protein 6                                                 |                                                                                                                                                                                                                                                                                                                                                                                                                                                                                                                                                                                                                                                                                                                                                                                                                                                                                                                                                                                                                                                                                                                                                                                                                                                                                                                                                                                                                                                                                                                                                                     |
| 1744.2056      | 1007.732      | 0.0066692 | NM_008969 // NM_006497   | -1.74 | <b>Ptgs1</b>                      | prostaglandin-endoperoxide synthase 1                                             | 0001516 // prostaglandin biosynthetic process // inferred from mutant phenotype // 0001516 // prostaglandin biosynthetic process // not recorded // 0006629 // lipid metabol                                                                                                                                                                                                                                                                                                                                                                                                                                                                                                                                                                                                                                                                                                                                                                                                                                                                                                                                                                                                                                                                                                                                                                                                                                                                                                                                                                                        |
| 321.54047      | 185.32677     | 0.0068697 | NM_001163763 // NM_001   | -1.72 | <b>Tcf19</b>                      | transcription factor 19                                                           |                                                                                                                                                                                                                                                                                                                                                                                                                                                                                                                                                                                                                                                                                                                                                                                                                                                                                                                                                                                                                                                                                                                                                                                                                                                                                                                                                                                                                                                                                                                                                                     |
| 373.47095      | 219.88608     | 0.0085912 | NM_001081062             | -1.72 | <b>Ccno</b>                       | cyclin O                                                                          |                                                                                                                                                                                                                                                                                                                                                                                                                                                                                                                                                                                                                                                                                                                                                                                                                                                                                                                                                                                                                                                                                                                                                                                                                                                                                                                                                                                                                                                                                                                                                                     |
| 1369.9546      | 801.1917      | 0.0068707 | NM_0023223               | -1.72 | <b>Cdc20</b>                      | cell division cycle 20                                                            | 0006284 // base-excision repair // not recorded // 0007049 // cell cycle // not recorded // 0030030 // cell projection organization // inferred from electronic annotation // 000                                                                                                                                                                                                                                                                                                                                                                                                                                                                                                                                                                                                                                                                                                                                                                                                                                                                                                                                                                                                                                                                                                                                                                                                                                                                                                                                                                                   |
| 405.17148      | 241.57718     | 0.0068697 | NM_0097238 // NM_138     | -1.71 | <b>Aldh7a1</b>                    | aldehyde dehydrogenase family 7, member A1                                        | 0007049 // cell cycle // inferred from electronic annotation // 0007067 // mitotic nuclear division // inferred from electronic annotation // 0007399 // nervous system develop                                                                                                                                                                                                                                                                                                                                                                                                                                                                                                                                                                                                                                                                                                                                                                                                                                                                                                                                                                                                                                                                                                                                                                                                                                                                                                                                                                                     |
| 121.321014     | 100.065291    | 0.0056291 | NM_0009764 // NM_006532  | -1.71 | <b>Brcs1</b>                      | breast cancer 1, early onset                                                      | 0008152 // metabolic process // inferred from electronic annotation // 0019285 // glycine betaine biosynthetic process from choline // inferred from electronic annotation // 000                                                                                                                                                                                                                                                                                                                                                                                                                                                                                                                                                                                                                                                                                                                                                                                                                                                                                                                                                                                                                                                                                                                                                                                                                                                                                                                                                                                   |
| 198.91296      | 114.78199     | 0.0084641 | NM_001110265 // NM_001   | -1.71 | <b>Ttk</b>                        | Ttk protein kinase                                                                | 0000724 // double-strand break repair via homologous recombination // not recorded // 0006260 // DNA replication // inferred from mutant phenotype // 0006281 // DNA r                                                                                                                                                                                                                                                                                                                                                                                                                                                                                                                                                                                                                                                                                                                                                                                                                                                                                                                                                                                                                                                                                                                                                                                                                                                                                                                                                                                              |
| 197.26901      | 114.24718     | 0.0063393 | NM_001081407 // NM_030   | -1.71 | <b>Plb1</b>                       | phospholipase B1                                                                  | 0006468 // protein phosphorylation // inferred from electronic annotation // 0007093 // mitotic cell cycle checkpoint // inferred from electronic annotation // 00016310 // ph                                                                                                                                                                                                                                                                                                                                                                                                                                                                                                                                                                                                                                                                                                                                                                                                                                                                                                                                                                                                                                                                                                                                                                                                                                                                                                                                                                                      |
| 1097.7009      | 649.7863      | 0.0063393 | NM_0027324 // NM_006516  | -1.71 | <b>Sfkn1</b>                      | sideroflexin 1                                                                    | 0006629 // lipid metabolic process // inferred from electronic annotation // 0006644 // phospholipid metabolic process // not recorded // 0016042 // lipid catabolic process, s                                                                                                                                                                                                                                                                                                                                                                                                                                                                                                                                                                                                                                                                                                                                                                                                                                                                                                                                                                                                                                                                                                                                                                                                                                                                                                                                                                                     |
| 3455.324       | 1978.3197     | 0.0065291 | NM_016904                | -1.71 | <b>Cks1b</b>                      | CDC28 protein kinase 1b                                                           | 0006810 // transport // inferred from electronic annotation // 0006811 // ion transport // inferred from electronic annotation // 0006826 // iron ion transport // inferred fro                                                                                                                                                                                                                                                                                                                                                                                                                                                                                                                                                                                                                                                                                                                                                                                                                                                                                                                                                                                                                                                                                                                                                                                                                                                                                                                                                                                     |
| 1097.9629      | 652.45746     | 0.0089693 | NM_009103                | -1.70 | <b>Rrm1</b>                       | ribonucleotide reductase M1                                                       | 0007049 // cell cycle // inferred from electronic annotation // 00045859 // regulation of protein kinase activity // inferred from electronic annotation // 00051301 // cell division                                                                                                                                                                                                                                                                                                                                                                                                                                                                                                                                                                                                                                                                                                                                                                                                                                                                                                                                                                                                                                                                                                                                                                                                                                                                                                                                                                               |
| 154.63812      | 91.652245     | 0.0087842 | NM_0197777 // NM_006529  | -1.70 | <b>Ikbe</b>                       | inhibitor of kappaB kinase epsilon1                                               | 000278 // mitotic cell cycle // inferred from electronic annotation // 0006206 // pyrimidine nucleobase metabolic process // inferred from electronic annotation // 0000260                                                                                                                                                                                                                                                                                                                                                                                                                                                                                                                                                                                                                                                                                                                                                                                                                                                                                                                                                                                                                                                                                                                                                                                                                                                                                                                                                                                         |
| 126.2824       | 74.05487      | 0.0085929 | NM_009434 // NM_006508   | -1.69 | <b>Phlda2</b>                     | pleckstrin homology-like domain, family A, member 2                               | 0006468 // protein phosphorylation // not recorded // 0006974 // cellular response to DNA damage stimulus // inferred from electronic annotation // 0007252 // h-kappa p1                                                                                                                                                                                                                                                                                                                                                                                                                                                                                                                                                                                                                                                                                                                                                                                                                                                                                                                                                                                                                                                                                                                                                                                                                                                                                                                                                                                           |
| 897.0389       | 538.2648      | 0.004422  | NM_134022                | -1.69 | <b>633040307Rik</b>               | RIKEN cDNA 633040307 gene                                                         | 0001890 // placenta development // inferred from direct assay // 0009887 // organ morphogenesis // inferred from mutant phenotype // 0010468 // regulation of gene expr                                                                                                                                                                                                                                                                                                                                                                                                                                                                                                                                                                                                                                                                                                                                                                                                                                                                                                                                                                                                                                                                                                                                                                                                                                                                                                                                                                                             |
| 599.1347       | 326.11835     | 0.0075984 | NM_001310659 // NM_008   | -1.68 | <b>Igfbp2</b>                     | insulin-like growth factor binding protein 2                                      | 0001558 // regulation of cell growth // inferred from electronic annotation // 0007165 // signal transduction // inferred from electronic annotation // 0007565 // female preg                                                                                                                                                                                                                                                                                                                                                                                                                                                                                                                                                                                                                                                                                                                                                                                                                                                                                                                                                                                                                                                                                                                                                                                                                                                                                                                                                                                      |
| 91.67897       | 54.652256     | 0.0080529 | NM_012012 // NM_006496   | -1.67 | <b>Exo1</b>                       | exonuclease 1                                                                     | 0002376 // immune system process // inferred from electronic annotation // 0002455 // humoral immune response mediated by circulating immunoglobulin // inferred from                                                                                                                                                                                                                                                                                                                                                                                                                                                                                                                                                                                                                                                                                                                                                                                                                                                                                                                                                                                                                                                                                                                                                                                                                                                                                                                                                                                               |
| 347.5209       | 209.89442     | 0.0066381 | NM_008446 // NM_006527   | -1.67 | <b>Kif4</b>                       | kinessin family member 4                                                          | 0000281 // mitotic cytokinesis // not recorded // 0007018 // microtubule-based movement // not recorded // 0008152 // metabolic process // inferred from electronic anno                                                                                                                                                                                                                                                                                                                                                                                                                                                                                                                                                                                                                                                                                                                                                                                                                                                                                                                                                                                                                                                                                                                                                                                                                                                                                                                                                                                            |
| 1016.0242      | 618.9151      | 0.0097017 | NM_025912 // NM_006500   | -1.67 | <b>Fam210b</b>                    | family with sequence similarity 210, member B                                     |                                                                                                                                                                                                                                                                                                                                                                                                                                                                                                                                                                                                                                                                                                                                                                                                                                                                                                                                                                                                                                                                                                                                                                                                                                                                                                                                                                                                                                                                                                                                                                     |
| 200.88041      | 145.02652     | 0.0071653 | NM_011132                | -1.66 | <b>Pole</b>                       | polymerase (DNA directed), epsilon                                                | 0000082 // G1/S transition of mitotic cell cycle // not recorded // 0000731 // DNA synthesis involved in DNA repair // not recorded // 0001701 // in utero embryonic develop                                                                                                                                                                                                                                                                                                                                                                                                                                                                                                                                                                                                                                                                                                                                                                                                                                                                                                                                                                                                                                                                                                                                                                                                                                                                                                                                                                                        |
| 163.5017       | 97.06772      | 0.0063393 | NM_013542                | -1.66 | <b>Gzmb</b>                       | granzyme B                                                                        | 0001913 // T cell mediated cytotoxicity // inferred from mutant phenotype // 0006508 // proteolysis // inferred from electronic annotation // 0006915 // apoptotic process, DN                                                                                                                                                                                                                                                                                                                                                                                                                                                                                                                                                                                                                                                                                                                                                                                                                                                                                                                                                                                                                                                                                                                                                                                                                                                                                                                                                                                      |
| 934.4133       | 574.4162      | 0.006796  | NM_176838 // NM_006531   | -1.65 | <b>Esrp2</b>                      | epithelial splicing regulated protein 2                                           | 0006397 // mRNA processing // inferred from electronic annotation // 0008380 // RNA splicing // inferred from electronic annotation // 00043484 // regulation of RNA splicing                                                                                                                                                                                                                                                                                                                                                                                                                                                                                                                                                                                                                                                                                                                                                                                                                                                                                                                                                                                                                                                                                                                                                                                                                                                                                                                                                                                       |
| 399.2814       | 247.41849     | 0.0069718 | NM_138653 // NM_006537   | -1.65 | <b>Bspry</b>                      | B-box and SPRY domain containing                                                  | 0006810 // transport // inferred from electronic annotation // 0006811 // ion transport // inferred from electronic annotation // 0006816 // calcium ion transport // inferre                                                                                                                                                                                                                                                                                                                                                                                                                                                                                                                                                                                                                                                                                                                                                                                                                                                                                                                                                                                                                                                                                                                                                                                                                                                                                                                                                                                       |
| 626.9157       | 389.03702     | 0.0090404 | NM_001159646 // NM_023   | -1.64 | <b>Dut</b>                        | deoxyuridine triphosphatase                                                       | 0006226 // dUMP biosynthetic process // not recorded // 0043497 // regulation of protein heterodimerization activity // not recorded // 0046080 // dUTP metabolic process                                                                                                                                                                                                                                                                                                                                                                                                                                                                                                                                                                                                                                                                                                                                                                                                                                                                                                                                                                                                                                                                                                                                                                                                                                                                                                                                                                                           |
| 272.6889       | 166.64886     | 0.0065754 | NM_007633                | -1.63 | <b>Ccne1</b>                      | cyclin E1                                                                         | 0000082 // G1/S transition of mitotic cell cycle // inferred from electronic annotation // 0001547 // antral ovarian follicle growth // inferred from electronic annotation // 000                                                                                                                                                                                                                                                                                                                                                                                                                                                                                                                                                                                                                                                                                                                                                                                                                                                                                                                                                                                                                                                                                                                                                                                                                                                                                                                                                                                  |
| 1442.2517      | 886.77435     | 0.004326  | NM_001289724 // NM_001   | -1.63 | <b>Silp</b>                       | stem-loop binding protein                                                         | 0006397 // mRNA processing // inferred from electronic annotation // 0006398 // mRNA 3'-end processing by stem-loop binding and cleavage // inferred from direct assay //,                                                                                                                                                                                                                                                                                                                                                                                                                                                                                                                                                                                                                                                                                                                                                                                                                                                                                                                                                                                                                                                                                                                                                                                                                                                                                                                                                                                          |
| 681.90967      | 423.89102     | 0.0055381 | NM_198937                | -1.63 | <b>Hn1l</b>                       | hematological and neurological expressed 1-like                                   |                                                                                                                                                                                                                                                                                                                                                                                                                                                                                                                                                                                                                                                                                                                                                                                                                                                                                                                                                                                                                                                                                                                                                                                                                                                                                                                                                                                                                                                                                                                                                                     |
| 81.28702       | 49.95855      | 0.0068697 | NM_029249 // NM_006514   | -1.63 | <b>Parpbbp</b>                    | PARP1 binding protein                                                             | 0006281 // DNA repair // inferred from electronic annotation // 0006974 // cellular response to DNA damage stimulus // inferred from electronic annotation // 2000042 // m                                                                                                                                                                                                                                                                                                                                                                                                                                                                                                                                                                                                                                                                                                                                                                                                                                                                                                                                                                                                                                                                                                                                                                                                                                                                                                                                                                                          |
| 158.24734      | 96.889694     | 0.0046248 | NM_001110162 // NM_175   | -1.62 | <b>Cdca2</b>                      | cell division cycle associated 2                                                  | 0007049 // cell cycle // inferred from electronic annotation // 0007059 // chromosome segregation // inferred from direct assay // 0007067 // mitotic nuclear division // infc                                                                                                                                                                                                                                                                                                                                                                                                                                                                                                                                                                                                                                                                                                                                                                                                                                                                                                                                                                                                                                                                                                                                                                                                                                                                                                                                                                                      |
| 121.6674       | 75.24433      | 0.0068697 | NM_183064 // NM_006527   | -1.61 | <b>Kif20b</b>                     | kinessin family member 20B                                                        | 0001843 // neural tube closure // inferred from mutant phenotype // 0007018 // microtubule-based movement // inferred from electronic annotation // 0007049 // cell cycl                                                                                                                                                                                                                                                                                                                                                                                                                                                                                                                                                                                                                                                                                                                                                                                                                                                                                                                                                                                                                                                                                                                                                                                                                                                                                                                                                                                            |
| 75.92991       | 47.093437     | 0.0066692 | NM_001122958 // NM_001   | -1.61 | <b>Rad54l</b>                     | RAD54 like (S. cerevisiae)                                                        | 0000724 // double-strand break repair via homologous recombination // inferred from genetic interaction // 0000724 // double-strand break repair via homologous recomb                                                                                                                                                                                                                                                                                                                                                                                                                                                                                                                                                                                                                                                                                                                                                                                                                                                                                                                                                                                                                                                                                                                                                                                                                                                                                                                                                                                              |
| 344.59515      | 216.81549     | 0.0065754 | NM_024257                | -1.61 | <b>Hdh3</b>                       | haloacid dehalogenase-like hydrolase domain containing 3                          | 0008152 // metabolic process // inferred from electronic annotation                                                                                                                                                                                                                                                                                                                                                                                                                                                                                                                                                                                                                                                                                                                                                                                                                                                                                                                                                                                                                                                                                                                                                                                                                                                                                                                                                                                                                                                                                                 |
| 100.83858      | 62.93387      | 0.0063393 | NM_201364 // NM_006496   | -1.60 | <b>BC055324</b>                   | cDNA sequence BC055324                                                            |                                                                                                                                                                                                                                                                                                                                                                                                                                                                                                                                                                                                                                                                                                                                                                                                                                                                                                                                                                                                                                                                                                                                                                                                                                                                                                                                                                                                                                                                                                                                                                     |
| 317.17         | 199.7879      | 0.0084354 | NM_181589 // NM_006500   | -1.59 | <b>Kcap2l</b>                     | cytoskeleton associated protein 2-like                                            |                                                                                                                                                                                                                                                                                                                                                                                                                                                                                                                                                                                                                                                                                                                                                                                                                                                                                                                                                                                                                                                                                                                                                                                                                                                                                                                                                                                                                                                                                                                                                                     |
| 203.13467      | 126.308655    | 0.0080529 | NM_001163495 // NM_027   | -1.59 | <b>Arhgap19</b>                   | Rho GTPase activating protein 19                                                  | 0007165 // signal transduction // inferred from electronic annotation // 0043547 // positive regulation of GTPase activity // inferred from electronic annotation                                                                                                                                                                                                                                                                                                                                                                                                                                                                                                                                                                                                                                                                                                                                                                                                                                                                                                                                                                                                                                                                                                                                                                                                                                                                                                                                                                                                   |
| 1103.5352      | 702.88635     | 0.0086932 | NM_134081                | -1.59 | <b>Dnajc9</b>                     | Dnaj (Hsp40) homolog, subfamily C, member 9                                       | 0032781 // positive regulation of ATPase activity // not recorded // 0035176 // social behavior // inferred from electronic annotation                                                                                                                                                                                                                                                                                                                                                                                                                                                                                                                                                                                                                                                                                                                                                                                                                                                                                                                                                                                                                                                                                                                                                                                                                                                                                                                                                                                                                              |
| 63.379673      | 203.8792      | 0.0046248 | NM_001163766 // NM_134   | -1.59 | <b>Wdr90</b>                      | WD repeat domain 90                                                               |                                                                                                                                                                                                                                                                                                                                                                                                                                                                                                                                                                                                                                                                                                                                                                                                                                                                                                                                                                                                                                                                                                                                                                                                                                                                                                                                                                                                                                                                                                                                                                     |
| 63.379288      | 39.879528     | 0.0096878 | NM_01311124 // NM_001    | -1.59 | <b>Celf5</b>                      | CUGBP, Elav-like family member 5                                                  |                                                                                                                                                                                                                                                                                                                                                                                                                                                                                                                                                                                                                                                                                                                                                                                                                                                                                                                                                                                                                                                                                                                                                                                                                                                                                                                                                                                                                                                                                                                                                                     |
| 671.19885      | 429.11035     | 0.0079038 | NM_024184                | -1.59 | <b>Asf1b</b>                      | anti-silencing function 1B histone chaperone                                      | 0006333 // chromatin assembly or disassembly // inferred from electronic annotation // 0006334 // nucleosome assembly // inferred from direct assay // 0006335 // DNA re                                                                                                                                                                                                                                                                                                                                                                                                                                                                                                                                                                                                                                                                                                                                                                                                                                                                                                                                                                                                                                                                                                                                                                                                                                                                                                                                                                                            |
| 645.78125      | 413.081       | 0.0089693 | NM_011950                | -1.59 | <b>Mapk13</b>                     | mitogen-activated protein kinase 13                                               | 0000165 // MAPK cascade // not recorded // 0006351 // transcription, DNA-templated // inferred from electronic annotation // 0006355 // regulation of transcription, DNA-1                                                                                                                                                                                                                                                                                                                                                                                                                                                                                                                                                                                                                                                                                                                                                                                                                                                                                                                                                                                                                                                                                                                                                                                                                                                                                                                                                                                          |
| 759.81165      | 487.55862     | 0.0085589 | NM_026384                | -1.59 | <b>Dgat2</b>                      | diacylglycerol O-acyltransferase 2                                                | 0006071 // glycerol metabolic process // inferred from electronic annotation // 0006629 // lipid metabolic process // inferred from electronic annotation // 0010867 // positi                                                                                                                                                                                                                                                                                                                                                                                                                                                                                                                                                                                                                                                                                                                                                                                                                                                                                                                                                                                                                                                                                                                                                                                                                                                                                                                                                                                      |
| 2548.035       | 1558.9877     | 0.0087791 | NM_172543 // NM_006532   | -1.57 | <b>Fam117a</b>                    | family with sequence similarity 117, member A                                     |                                                                                                                                                                                                                                                                                                                                                                                                                                                                                                                                                                                                                                                                                                                                                                                                                                                                                                                                                                                                                                                                                                                                                                                                                                                                                                                                                                                                                                                                                                                                                                     |
| 1813.1226      | 1152.7639     | 0.0098452 | NM_011358 // NM_006532   | -1.57 | <b>Srsf2</b>                      | serine/arginine-rich splicing factor 2                                            | 0000381 // regulation of alternative mRNA splicing, via spliceosome // inferred from direct assay // 0006397 // mRNA processing // inferred from electronic annotation // 000                                                                                                                                                                                                                                                                                                                                                                                                                                                                                                                                                                                                                                                                                                                                                                                                                                                                                                                                                                                                                                                                                                                                                                                                                                                                                                                                                                                       |
| 892.33356      | 575.13965     | 0.0090944 | NM_026598                | -1.57 | <b>Ebp1</b>                       | emopamil binding protein-like                                                     | 0016125 // steroid metabolic process // inferred from electronic annotation                                                                                                                                                                                                                                                                                                                                                                                                                                                                                                                                                                                                                                                                                                                                                                                                                                                                                                                                                                                                                                                                                                                                                                                                                                                                                                                                                                                                                                                                                         |
| 256.2794       | 163.40034     | 0.0065464 | NM_019487                | -1.57 | <b>Hebp2</b>                      | heme binding protein 2                                                            | 0010917 // negative regulation of mitochondrial membrane potential // not recorded // 0010940 // positive regulation of necrotic cell death // not recorded // 0025794 // pc                                                                                                                                                                                                                                                                                                                                                                                                                                                                                                                                                                                                                                                                                                                                                                                                                                                                                                                                                                                                                                                                                                                                                                                                                                                                                                                                                                                        |
| 222.41306      | 141.4752      | 0.0068697 | NM_026412 // NM_006499   | -1.56 | <b>Knstrn</b>                     | kinetochore-localized astrin/SPAG5 binding                                        | 0000070 // mitotic sister chromatid segregation // not recorded // 0007049 // cell cycle // inferred from electronic annotation // 0007051 // spindle organization // not rec                                                                                                                                                                                                                                                                                                                                                                                                                                                                                                                                                                                                                                                                                                                                                                                                                                                                                                                                                                                                                                                                                                                                                                                                                                                                                                                                                                                       |
| 61.122593      | 39.136593     | 0.0075124 | NM_183287 // NM_006522   | -1.56 | <b>2610318N02Rik</b>              | RIKEN cDNA 2610318N02 gene                                                        |                                                                                                                                                                                                                                                                                                                                                                                                                                                                                                                                                                                                                                                                                                                                                                                                                                                                                                                                                                                                                                                                                                                                                                                                                                                                                                                                                                                                                                                                                                                                                                     |
| 23.524618      | 14.733796     | 0.0084703 | NM_001162954 // NM_011   | -1.56 | <b>Gm8267</b>                     | predicted gene 8267                                                               |                                                                                                                                                                                                                                                                                                                                                                                                                                                                                                                                                                                                                                                                                                                                                                                                                                                                                                                                                                                                                                                                                                                                                                                                                                                                                                                                                                                                                                                                                                                                                                     |
| 25.98156       | 16.873371     | 0.0096878 | NM_01034882              | -1.55 | <b>Kbtbd6</b>                     | kelch repeat and BTB (POZ) domain containing 6                                    | 0016567 // protein ubiquitination // not recorded                                                                                                                                                                                                                                                                                                                                                                                                                                                                                                                                                                                                                                                                                                                                                                                                                                                                                                                                                                                                                                                                                                                                                                                                                                                                                                                                                                                                                                                                                                                   |
| 70.1359        | 50.64932      | 0.003657  | NM_146218 // NM_006530   | -1.55 | <b>Rfwd3</b>                      | ring finger and WD repeat domain 3                                                | 0002230 // positive regulation of defense response to virus by host // not recorded // 0006281 // DNA repair // inferred from electronic annotation // 0006974 // cellular res                                                                                                                                                                                                                                                                                                                                                                                                                                                                                                                                                                                                                                                                                                                                                                                                                                                                                                                                                                                                                                                                                                                                                                                                                                                                                                                                                                                      |
| 262.974        | 168.92628     | 0.0097449 | NM_009773 // NM_006498   | -1.55 | <b>Bub1b</b>                      | budding uninhibited by benzimidazoles 1 homolog, beta (S. cerevisiae)             | 0006468 // protein phosphorylation // inferred from electronic annotation // 0006915 // apoptotic process // inferred from electronic annotation // 0007049 // cell cycle // h                                                                                                                                                                                                                                                                                                                                                                                                                                                                                                                                                                                                                                                                                                                                                                                                                                                                                                                                                                                                                                                                                                                                                                                                                                                                                                                                                                                      |
| 195.14597      | 123.61147     | 0.0071653 | NM_001190161 // NM_019   | -1.55 | <b>Psrc1</b>                      | perlecan/serine-rich collod-coll 1                                                | 0001578 // microtubule bundle formation // inferred from direct assay // 0007049 // cell cycle // inferred from electronic annotation // 0007067 // mitotic nuclear division //                                                                                                                                                                                                                                                                                                                                                                                                                                                                                                                                                                                                                                                                                                                                                                                                                                                                                                                                                                                                                                                                                                                                                                                                                                                                                                                                                                                     |
| 1528.5718      | 997.962       | 0.0051715 | NM_001035226 // NM_134   | -1.54 | <b>Xpo1</b>                       | exportin 1, CRM1 homolog (yeast)                                                  | 0000055 // ribosomal large subunit export from nucleus // not recorded // 0000056 // ribosomal small subunit export from nucleus // not recorded // 0000122 // negative re                                                                                                                                                                                                                                                                                                                                                                                                                                                                                                                                                                                                                                                                                                                                                                                                                                                                                                                                                                                                                                                                                                                                                                                                                                                                                                                                                                                          |
| 2498.0105      | 1610.6658     | 0.0075048 | NM_001039129 // NM_001   | -1.54 | <b>Gm10052 // Gm5803 // Hnmrg</b> | heterogeneous nuclear ribonucleoprotein A1 pseudogene // predicted gene 5803 // h |                                                                                                                                                                                                                                                                                                                                                                                                                                                                                                                                                                                                                                                                                                                                                                                                                                                                                                                                                                                                                                                                                                                                                                                                                                                                                                                                                                                                                                                                                                                                                                     |
| 113.88868      | 73.41951      | 0.0085208 | NM_007263                | -1.54 | <b>Apd1t</b>                      | apoptosis-inducing, TAF9-like domain 1                                            | 0000712 // resolution of meiotic recombination intermediates // inferred from sequence or structural similarity // 0000712 // resolution of meiotic recombination intermed                                                                                                                                                                                                                                                                                                                                                                                                                                                                                                                                                                                                                                                                                                                                                                                                                                                                                                                                                                                                                                                                                                                                                                                                                                                                                                                                                                                          |
| 260.19714      | 171.23952     | 0.0059002 | NM_009951                | -1.54 | <b>Igf2bp1</b>                    | insulin-like growth factor 2 mRNA binding protein 1                               | 0006403 // RNA localization // not recorded // 0006417 // regulation of translation // inferred from electronic annotation // 0006810 // transport // inferred from electronic                                                                                                                                                                                                                                                                                                                                                                                                                                                                                                                                                                                                                                                                                                                                                                                                                                                                                                                                                                                                                                                                                                                                                                                                                                                                                                                                                                                      |
| 487.11728      | 320.79062     | 0.0085929 | NM_153783 // NM_006536   | -1.54 | <b>Paox</b>                       | polyamine oxidase (exo-N4-amino)                                                  | 0006598 // polyamine catabolic process // inferred from direct assay // 0006598 // polyamine catabolic process // not recorded // 0008215 // spermine metabolic process //                                                                                                                                                                                                                                                                                                                                                                                                                                                                                                                                                                                                                                                                                                                                                                                                                                                                                                                                                                                                                                                                                                                                                                                                                                                                                                                                                                                          |
| 85.46114       | 55.791164     | 0.0051039 | NM_175563                | -1.52 | <b>Prr11</b>                      | proline rich 11                                                                   | 0051726 // regulation of cell cycle // not recorded                                                                                                                                                                                                                                                                                                                                                                                                                                                                                                                                                                                                                                                                                                                                                                                                                                                                                                                                                                                                                                                                                                                                                                                                                                                                                                                                                                                                                                                                                                                 |
| 762.26917      | 509.4285      | 0.0084641 | NM_025649                | -1.52 | <b>Mad211bp</b>                   | MAD2L1 binding protein                                                            | 0007093 // mitotic cell cycle checkpoint // not recorded // 0007094 // mitotic spindle assembly checkpoint // not recorded // 0007096 // regulation of exit from mitosis // no                                                                                                                                                                                                                                                                                                                                                                                                                                                                                                                                                                                                                                                                                                                                                                                                                                                                                                                                                                                                                                                                                                                                                                                                                                                                                                                                                                                      |
| 34.702877      | 22.945415     | 0.0071292 | NM_024720                | -1.52 | <b>2700099C18Rik</b>              | NDC80 homolog, kinetochore complex component pseudogene                           |                                                                                                                                                                                                                                                                                                                                                                                                                                                                                                                                                                                                                                                                                                                                                                                                                                                                                                                                                                                                                                                                                                                                                                                                                                                                                                                                                                                                                                                                                                                                                                     |
| 2016.1809      | 1315.6638     | 0.0070902 | NM_025968 // NM_011250   | -1.51 | <b>Ptgr1</b>                      | prostaglandin reductase 1                                                         | 0006693 // prostaglandin metabolic process // inferred from electronic annotation // 0009636 // response to toxic substance // inferred from electronic annotation // 000551                                                                                                                                                                                                                                                                                                                                                                                                                                                                                                                                                                                                                                                                                                                                                                                                                                                                                                                                                                                                                                                                                                                                                                                                                                                                                                                                                                                        |
| 117.59393      | 77.464584     | 0.0087842 | NM_019670 // NM_006519   | -1.51 | <b>Diaph3</b>                     | diaphanous-related formin 3                                                       | 0007283 // spermatogenesis // inferred from electronic annotation // 0016043 // cellular component organization //                                                                                                                                                                                                                                                                                                                                                                                                                                                                                                                                                                                                                                                                                                                                                                                                                                                                                                                                                                                                                                                                                                                                                                                                                                                                                                                                                                                                                                                  |

| [C3H/HeN][raw] | [Gsr-KO][raw] | p [Corr]  | RefSeq Transcript ID         | FD    | Gene Symbol                     | Gene Title                                                                       | Gene Ontology Biological Process                                                                                                                                              |
|----------------|---------------|-----------|------------------------------|-------|---------------------------------|----------------------------------------------------------------------------------|-------------------------------------------------------------------------------------------------------------------------------------------------------------------------------|
| 841.2377       | 568.9676      | 0.008466  | NM_010516                    | -1.50 | <b>Cyr61</b>                    | cysteine rich protein 61                                                         | 0001558 // regulation of cell growth // inferred from electronic annotation//0001649 // osteoblast differentiation // inferred from genetic interaction//0001934 // positive  |
| 39.233936      | 26.668457     | 0.008644  | NM_001039154//NM_001-1.50    |       | <b>Cdh8</b>                     | cadherin 8                                                                       | 0007155 // cell adhesion // inferred from electronic annotation//0007156 // homophilic cell adhesion via plasma membrane adhesion molecules // inferred from electronic       |
| 242.73042      | 162.77852     | 0.0080529 | NM_010892//NM_006497:-1.49   |       | <b>Nek2</b>                     | NIMA (Never in mitosis gene a)-related expressed kinase 2                        | 0000070 // mitotic sister chromatid segregation // inferred from mutant phenotype//0001824 // blastocyst development // inferred from mutant phenotype//0006468 //            |
| 382.83978      | 261.87766     | 0.0089693 | NM_0028354//NM_006515:-1.49  |       | <b>Tdp1</b>                     | tyrosyl-DNA phosphodiesterase 1                                                  | 0000012 // single strand break repair // inferred from mutant phenotype//0000012 // single strand break repair // not recorded//0006281 // DNA repair // inferred from r      |
| 118.30512      | 79.17589      | 0.0097449 | NM_172520//NM_006538:-1.48   |       | <b>Arhgef19</b>                 | Rho guanine nucleotide exchange factor (GEF) 19                                  | 0032956 // regulation of actin cytoskeleton organization // not recorded//0035023 // regulation of Rho protein signal transduction // inferred from electronic annotation//   |
| 329.81055      | 227.59697     | 0.0094249 | NM_001163633//NM_001-1.48    |       | <b>Wnt7b</b>                    | wingless-type NMMTV integration site family, member 7B                           | 0001525 // angiogenesis // inferred from genetic interaction//0001525 // inferred from mutant phenotype//0001701 // in utero embryonic development //                         |
| 726.72424      | 499.79703     | 0.0084423 | NM_001289524//NM_001-1.48    |       | <b>Lrrcd4</b>                   | leucine rich repeat containing 4                                                 |                                                                                                                                                                               |
| 2794.6465      | 1870.1539     | 0.0070902 | NM_009698                    | -1.47 | <b>Aprt</b>                     | adenine phosphoribosyl transferase                                               | 0006166 // purine ribonucleoside salvage // inferred from genetic interaction//0006166 // purine ribonucleoside salvage // inferred from mutant phenotype//0006168 // a       |
| 567.54504      | 390.1537      | 0.0051094 | NM_0026908//NM_006519:-1.47  |       | <b>Cab39l</b>                   | calcium binding protein 39-like                                                  |                                                                                                                                                                               |
| 365.44797      | 250.73454     | 0.0084055 | NM_0263003//NM_006509:-1.47  |       | <b>Alkbh8</b>                   | alkB, alkylation repair homolog 8 (E. coli)                                      |                                                                                                                                                                               |
| 818.74744      | 567.2709      | 0.0079038 | NM_001190711//NM_013-1.47    |       | <b>Dbp4</b>                     | DBF4 homolog (S. cerevisiae)                                                     | 0002098 // tRNA wobble uridine modification // inferred from direct assay//0002098 // tRNA wobble uridine modification // not recorded//0006974 // cellular response to       |
| 45.819626      | 31.684292     | 0.0099354 | NM_0273663//NM_0112411:-1.46 |       | <b>Chp2</b>                     | calcineurin-like EF hand protein 2                                               | 0006260 // DNA replication // inferred from electronic annotation//0006468 // protein phosphorylation // --//0007049 // cell cycle // inferred from electronic annotation//   |
| 200.00963      | 136.01129     | 0.0064729 | NM_016662//XR_873434-1.46    |       | <b>Mxd3</b>                     | MAX dimerization protein 3                                                       | 0006810 // transport // inferred from electronic annotation//0006814 // sodium ion transport // not recorded//0006885 // regulation of pH // not recorded//0008284 //         |
| 461.896        | 322.12955     | 0.0066908 | NM_146013//NM_006514:-1.46   |       | <b>Sec14a</b>                   | SEC14-like lipid binding 4                                                       | 0006351 // transcription, DNA-templated // inferred from electronic annotation//0006355 // regulation of transcription, DNA-templated // inferred from electronic annotat     |
| 65.65217       | 45.232828     | 0.0065276 | NM_033603                    | -1.46 | <b>Ann</b>                      | anninoseless                                                                     | 0006810 // transport // inferred from electronic annotation                                                                                                                   |
| 4909.1685      | 3253.606      | 0.0083164 | NM_001161624//NM_009-1.46    |       | <b>Cdkn1c</b>                   | cyclin-dependent kinase inhibitor 1C (P57)                                       | 0000122 // negative regulation of transcription from RNA polymerase II promoter // inferred from genetic interaction//0001501 // skeletal system development // inferred d    |
| 1072.6212      | 747.982       | 0.0066692 | NM_025433                    | -1.45 | <b>Rpl71</b>                    | ribosomal protein L71-like 1                                                     | 0000463 // maturation of LSU-rRNA from tritricotronic rRNA transcript (SSU-rRNA, 5.8S rRNA, LSU-rRNA) // --//0001825 // blastocyst formation // inferred from mutant phen     |
| 184.24342      | 126.50013     | 0.0085533 | NM_001168356//NM_134-1.45    |       | <b>Bnip1</b>                    | BCL2/adenovirus E1B 19kD interacting protein like N-methylpurine-DNA glycosylase | 0006915 // apoptotic process // not recorded//0008285 // negative regulation of cell proliferation // not recorded//0004009 // regulation of growth rate // not rec           |
| 198.97799      | 138.8105      | 0.0088935 | NM_0108821//NM_006514:-1.44  |       | <b>Mpg</b>                      | N-methylpurine-DNA glycosylase                                                   | 0003281 // ventricular septum development // inferred from mutant phenotype//0006281 // DNA repair // inferred from electronic annotation//0006284 // base-excision           |
| 3658.6804      | 2501.2078     | 0.0096782 | NM_001164609//NM_001-1.44    |       | <b>Gm15453//Rbm3</b>            | predicted gene 15453//RNA binding motif protein 3                                | 0006412 // translation // inferred from direct assay//0006417 // regulation of translation // inferred from direct assay//0009409 // response to cold // inferred from direct |
| 39.6612        | 279.79776     | 0.007891  | NM_001114045//NM_001-1.44    |       | <b>Nde1</b>                     | nuclear distribution gene E homolog 1 (A nidulans)                               | 0000132 // establishment of mitotic spindle orientation // not recorded//0001764 // neuron migration // inferred from mutant phenotype//0007020 // microtubule nuclea         |
| 65.56716       | 45.494156     | 0.0084073 | NM_058214//NM_006521:-1.44   |       | <b>Recq4</b>                    | RecQ protein-like 4                                                              | 0000733 // DNA strand renaturation // not recorded//0001501 // skeletal system development // inferred from mutant phenotype//0006260 // DNA replication // not rec           |
| 63.784115      | 44.54083      | 0.0098942 | NM_0027664//NM_0112411:-1.44 |       | <b>Rimkb</b>                    | RECQ modification protein rimk-like family member B                              | 0006464 // cellular protein modification process // inferred from electronic annotation                                                                                       |
| 2562.9326      | 1751.9767     | 0.0066754 | NM_001078167//NM_173-1.43    |       | <b>Srsf1</b>                    | serine/arginine-rich splicing factor 1                                           | 0000380 // alternative mRNA splicing, via spliceosome // not recorded//0000395 // mRNA 5'-splice site recognition // not recorded//0001701 // in utero embryonic develo       |
| 131.15442      | 225.59178     | 0.0090494 | NM_007658//NM_006511:-1.43   |       | <b>Cdc25a</b>                   | cell division cycle 25A                                                          | 0000082 // G1/S transition of mitotic cell cycle // not recorded//0000087 // mitotic M phase // inferred from electronic annotation//0006470 // protein dephosphorylation     |
| 3946.533       | 2687.9207     | 0.0082244 | NM_0106655                   | -1.43 | <b>Kpna2</b>                    | karyopherin (importin) alpha 2                                                   | 0006606 // protein import into nucleus // inferred from direct assay//0006607 // NLS-bearing protein import into nucleus // not recorded//0006810 // transport // inferre     |
| 1170.7817      | 828.69446     | 0.0095304 | NM_0011570//NM_207176-1.43   |       | <b>Tes</b>                      | testis derived transcript                                                        | 0008285 // negative regulation of cell proliferation // not recorded//0042127 // regulation of cell proliferation // inferred from electronic annotation                      |
| 103.7571       | 71.90184      | 0.0076866 | NM_001039556//NM_001-1.43    |       | <b>Rad54b//Fsbp</b>             | RAD54 homolog B (S. cerevisiae)//fibrinogen silencer binding protein             | 0000724 // double-strand break repair via homologous recombination // inferred from genetic interaction//0000724 // double-strand break repair via homologous recomb          |
| 857.1333       | 613.53284     | 0.0089358 | NM_026374                    | -1.42 | <b>Ifi2</b>                     | interleukin enhancer binding factor 2                                            | 0006351 // transcription, DNA-templated // not recorded//0006355 // regulation of transcription, DNA-templated // inferred from electronic annotation//0006955 // imm         |
| 397.5968       | 283.0752      | 0.0051039 | NM_172746//NM_006507:-1.42   |       | <b>Hirp3</b>                    | HIRA interacting protein 3                                                       |                                                                                                                                                                               |
| 1083.3943      | 774.55927     | 0.0088565 | NM_001080129//NM_001-1.42    |       | <b>Tmpo</b>                     | thymopoeitin                                                                     | 0006355 // regulation of transcription, DNA-templated // inferred from direct assay                                                                                           |
| 180.46896      | 126.1987      | 0.0068697 | NM_146151//NM_006503:-1.42   |       | <b>Testk2</b>                   | testis-specific kinase 2                                                         | 0006468 // protein phosphorylation // not recorded//0007283 // spermatogenesis // inferred from sequence or structural similarity//0007283 // spermatogenesis // infern       |
| 199.74016      | 142.12122     | 0.0097983 | NM_001291105//NM_007-1.41    |       | <b>Ezf1</b>                     | E2F transcription factor 1                                                       | 0000077 // DNA damage checkpoint // not recorded//0000122 // negative regulation of transcription from RNA polymerase II promoter // not recorded//0006351 // trans           |
| 7045.2046      | 482.664       | 0.0090404 | NM_001166409//NM_001-1.41    |       | <b>Gm15453//Rbm3</b>            | predicted gene 15453//RNA binding motif protein 3                                | 0006412 // translation // inferred from direct assay//0006417 // regulation of translation // inferred from direct assay//0009409 // response to cold // inferred from direct |
| 112.97382      | 80.01478      | 0.0070836 | NM_172453//NM_006510:-1.40   |       | <b>Pif1</b>                     | Pif1 5'-to-3' DNA helicase homolog (S. cerevisiae)                               | 0000002 // mitochondrial genome maintenance // inferred from electronic annotation//0000002 // mitochondrial genome maintenance // --//0000723 // telomere maint              |
| 144.20753      | 102.839       | 0.0095304 | NM_028115//NM_029839,-1.40   |       | <b>Trub1</b>                    | TruB pseudouridine (psi) synthase homolog 1 (E. coli)                            | 0001522 // pseudouridine synthesis // inferred from electronic annotation//0006396 // RNA processing // inferred from electronic annotation//0006400 // tRNA modificat        |
| 995.60706      | 727.18274     | 0.0086932 | NM_001003898//NM_001-1.39    |       | <b>Tardbp</b>                   | TAR DNA binding protein                                                          | 0001933 // negative regulation of protein phosphorylation // not recorded//0006351 // transcription, DNA-templated // inferred from electronic annotation//0006355 // r       |
| 282.16516      | 203.95131     | 0.0071624 | NM_1980919//NM_006526:-1.39  |       | <b>Cep78</b>                    | centrosomal protein 78                                                           | 0007051 // spindle organization // not recorded                                                                                                                               |
| 50.60283       | 36.64795      | 0.0091486 | NM_001081099                 | -1.39 | <b>Aurip</b>                    | aurora kinase A and ninein interacting protein                                   | 0005975 // carbohydrate metabolic process // inferred from electronic annotation//0006012 // galactose metabolic process // inferred from direct assay//0019388 // gala       |
| 375.6049       | 274.1132      | 0.0083164 | NM_178389//NM_006539:-1.39   |       | <b>Gole</b>                     | galactose-4-epimerase, UDP                                                       | 0000216 // microtubule cytoskeleton organization // inferred from mutant phenotype//0003382 // epithelial cell morphogenesis // inferred from mutant phenotype//0008          |
| 285.11655      | 208.1093      | 0.0096908 | NM_001037711//NM_001-1.39    |       | <b>Cgn</b>                      | cingulin                                                                         | 0007019 // microtubule depolymerization // not recorded//0007052 // mitotic spindle organization // not recorded//0007275 // multicellular organismal developme               |
| 4312.385       | 3039.4275     | 0.0065291 | NM_019641                    | -1.39 | <b>Stmn1</b>                    | stathmin 1                                                                       | 0016051 // carbohydrate biosynthetic process // inferred from electronic annotation//0030206 // chondroitin sulfate biosynthetic process // not recorded                      |
| 68.5556        | 49.480053     | 0.0085573 | NM_0027928                   | -1.38 | <b>Chst13</b>                   | carbohydrate (chondroitin 4) sulfotransferase 13                                 | 0001222 // negative regulation of transcription from RNA polymerase II promoter // inferred from mutant phenotype//0006357 // regulation of transcription from RNA pol        |
| 11146.443      | 7459.6045     | 0.0069718 | NM_016957                    | -1.38 | <b>Hmgm2</b>                    | high mobility group nucleosomal binding domain 2                                 | 0006378 // mRNA polyadenylation // not recorded//0006379 // mRNA cleavage // not recorded//0006397 // mRNA processing // not recorded//0051262 // protein teta                |
| 1340.0198      | 979.1562      | 0.0066908 | NM_026623                    | -1.38 | <b>Nudt21</b>                   | NAD15, member RAS oncogene family                                                | 0006810 // transport // inferred from electronic annotation//0006886 // intracellular protein transport // not recorded//0006904 // vesicle docking involved in exocytosis,   |
| 805.3313       | 597.1891      | 0.0098942 | NM_134050//NM_006515:-1.37   |       | <b>Rab15</b>                    | RAB15, member RAS oncogene family                                                | 0007420 // brain development // not recorded//0008284 // positive regulation of cell proliferation // inferred from direct assay//0022008 // neurogenesis // not recorded//   |
| 886.3366       | 659.2985      | 0.0089693 | NM_133185//NM_011245:-1.37   |       | <b>Rogdi</b>                    | rogdi homolog (Drosophila)                                                       | 0006351 // transcription, DNA-templated // inferred from electronic annotation//0006355 // regulation of transcription, DNA-templated // inferred from electronic annotat     |
| 356.65585      | 268.56598     | 0.0080529 | NM_146040//NM_006515:-1.34   |       | <b>Cdca7l</b>                   | cell division cycle associated 7 like                                            | 0016310 // phosphorylation // inferred from electronic annotation                                                                                                             |
| 583.1446       | 404.53812     | 0.0066908 | NM_175400//NM_006497:-1.34   |       | <b>Sephs1</b>                   | serinephosphatase 1                                                              | 0006260 // DNA replication // inferred from electronic annotation//0006261 // DNA-dependent DNA replication // not recorded//0006297 // nucleotide-excision repair, DT        |
| 550.74396      | 421.81696     | 0.0090404 | NM_133692//NM_006508:-1.33   |       | <b>Polk3</b>                    | polymerase (DNA-directed), delta 3, accessory subunit                            | 0007165 // signal transduction // inferred from electronic annotation//0007186 // G-protein coupled receptor signaling pathway // inferred from electronic annotation//00     |
| 59.252865      | 44.97634      | 0.0096878 | NM_007975//NM_006530:-1.32   |       | <b>Fzr3</b>                     | coagulation factor II (thrombin) receptor-like 3                                 | 0006281 // DNA repair // inferred from electronic annotation//0006974 // cellular response to DNA damage stimulus // inferred from electronic annotation//0007140 // m        |
| 88.51907       | 66.801544     | 0.0090012 | NM_016925//NM_006530:-1.32   |       | <b>Fanca</b>                    | Fanconi anemia, complementation group A                                          | 0000027 // ribosomal large subunit assembly // --//0006412 // translation // inferred from electronic annotation                                                              |
| 8628.585       | 6220.639      | 0.0038887 | NM_009076//NR_880074-1.31    |       | <b>Rpl12//LOC10263504//Rpl</b>  | ribosomal protein L12//60S ribosomal protein L12 pseudogene//ribosomal protein   | 0007165 // signal transduction // traceable author statement//0008286 // insulin receptor signaling pathway // not recorded//0030178 // negative regulation of Wnt signal     |
| 2811.2795      | 2100.6084     | 0.0089748 | NM_001177629//NM_010-1.31    |       | <b>Grb10</b>                    | growth factor receptor bound protein 10                                          | 0000723 // DNA strand renaturation // not recorded//0006281 // DNA repair // not recorded//0006974 // cellular response to DNA damage stimulus // not recorded//000           |
| 76.42907       | 58.597046     | 0.0090933 | NM_00125945//NM_027-1.30     |       | <b>Zranb3</b>                   | zinc finger, RAN-binding domain containing 3                                     | 0000055 // ribosomal large subunit export from nucleus // inferred from mutant phenotype//0000056 // ribosomal small subunit export from nucleus // inferred from dir         |
| 7988.78        | 5829.5723     | 0.0079038 | NM_001252260//NM_001-1.30    |       | <b>LOC102643093//Npm1//Gn</b>   | nucleophosmin pseudogene//nucleophosmin 1//nucleophosmin 1 pseudogene            | 0006412 // translation // inferred from electronic annotation//0006418 // tRNA aminoacylation for protein translation // inferred from electronic annotation//0006425 //      |
| 1228.6104      | 962.49164     | 0.0038287 | NM_001168270//NM_133-1.29    |       | <b>Qars</b>                     | glutaminyl-tRNA synthetase                                                       | 0000460 // maturation of 5.8S rRNA // not recorded//0006364 // rRNA processing // inferred from electronic annotation                                                         |
| 631.62445      | 510.6885      | 0.0084703 | NM_026758//NM_011248:-1.26   |       | <b>Mphosph6</b>                 | M phase phosphoprotein 6                                                         | 0001841 // neural tube formation // inferred from mutant phenotype//0006810 // transport // inferred from electronic annotation//0006913 // nucleocytoplasmic transp          |
| 407.2649       | 331.5466      | 0.0091756 | NM_016714                    | -1.25 | <b>Nup50</b>                    | nucleoporin 50                                                                   | 0002376 // immune system process // inferred from electronic annotation//0006338 // chromatin remodeling // not recorded//0006351 // transcription, DNA-templated //          |
| 59.935574      | 74.86261      | 0.0089693 | NM_001037909//NM_030-1.25    |       | <b>C130026121Rik//Gm15753//</b> | RIKEN cDNA C130026121 gene//predicted gene 15753//predicted pseudogene 160;      |                                                                                                                                                                               |
| 1265.6335      | 1602.088      | 0.0099354 | NM_009551//NM_006527:1.27    |       | <b>Zfand5</b>                   | zinc finger, AN1-type domain 5                                                   | 0001701 // in utero embryonic development // inferred from mutant phenotype//0001944 // vasculature development // inferred from mutant phenotype//0003016 // re              |
| 127.72649      | 160.53023     | 0.0089567 | NM_010060//NM_006515:1.27    |       | <b>Dnah11</b>                   | dynein, axonemal, heavy chain 11                                                 | 0003341 // cilium movement // inferred from mutant phenotype//0003356 // regulation of cilium beat frequency // not recorded//0007018 // microtubule-based move               |
| 30.196898      | 38.96904      | 0.0086932 | NM_001167996                 | -1.28 | <b>1110032F04Rik</b>            | RIKEN cDNA 1110032F04 gene                                                       |                                                                                                                                                                               |
| 27.675762      | 35.937508     | 0.0089842 | NM_001033162//NM_00651-1.29  |       | <b>Shcbl1</b>                   | Shc SH2-domain binding protein 1-like                                            | 0002548 // monocyte chemotaxis // --//0006935 // chemotaxis // inferred from electronic annotation//0006954 // inflammatory response // inferred from electronic ann          |
| 43.234664      | 56.375098     | 0.0079038 | NM_021443//NM_011240:1.29    |       | <b>Cdk1//OC105242483</b>        | cyclin dependent kinase 8                                                        |                                                                                                                                                                               |
| 17936.076      | 22145.688     | 0.0097741 | NM_001289643//NM_001-1.29    |       | <b>Sgpb3a2</b>                  | spectrocytin, family 3A, member 2                                                |                                                                                                                                                                               |
| 20.887587      | 27.605907     | 0.0075448 | NM_020866//NR_045438-1.29    |       | <b>Mospd4</b>                   | mottle sperm domain containing 4                                                 |                                                                                                                                                                               |
| 100.64475      | 130.731       | 0.0065811 |                              | 1.31  | <b>BC038331</b>                 | cDNA sequence BC038331                                                           |                                                                                                                                                                               |
| 730.721        | 984.38116     | 0.008644  | NM_009419//NM_006534:1.31    |       | <b>Tps12</b>                    | protein-tyrosine sulfotransferase 2                                              | 0070972 // protein localization to endoplasmic reticulum // inferred from electronic annotation                                                                               |
| 347.82178      | 488.0608      | 0.0080529 | NM_175158                    | 1.32  | <b>Utp20</b>                    | UTP20, small subunit (SSU) processome component, homolog (yeast)                 | 0002070 // epithelial cell maturation // inferred from mutant phenotype//0031069 // hair follicle morphogenesis // inferred from mutant phenotype//0042335 // cuticle de      |
| 93.94369       | 123.4245      | 0.0090494 | NM_001159344//NM_027-1.33    |       | <b>Cas2l</b>                    | casein 2                                                                         | 0006478 // typhoid-tyrosine sulfation // inferred from mutant phenotype//0007342 // fusion of sperm to egg plasma membrane // inferred from mutant phenotype//006             |
| 563.8717       | 767.96265     | 0.0068788 | NM_001109992//NM_011-1.34    |       | <b>Ptpn11</b>                   | protein tyrosine phosphatase, non-receptor type 11                               | 0006364 // RNA processing // not recorded                                                                                                                                     |
| 88.377         | 116.905945    | 0.0097449 | NM_001081176                 | 1.34  | <b>Polr3g</b>                   | polymerase (RNA) III (DNA directed) polypeptide G                                | 0006351 // transcription, DNA-templated // inferred from electronic annotation//0006355 // regulation of transcription, DNA-templated // inferred from electronic annotat     |
| 109.69887      | 145.89856     | 0.0090626 | NM_001161832//NM_013-1.35    |       | <b>Tf</b>                       | brachyury 2                                                                      | 0000077 // immune system process // inferred from electronic annotation//0006351 // transcription, DNA-templated // inferred from electronic annotation//0006359 // n         |
| 44.81647       | 60.534645     | 0.0086897 | NM_001039537//NM_008-1.35    |       | <b>Lj1</b>                      | leukemia inhibitory factor                                                       | 0014028 // notchchord formation // inferred from mutant phenotype                                                                                                             |
| 155.65524      | 209.5741      | 0.0063393 | NM_145132                    | 1.35  | <b>Mchr1</b>                    | melanin-concentrating hormone receptor 1                                         | 0001974 // blood vessel remodeling // inferred from genetic interaction//0006955 // immune response // inferred from electronic annotation//0007566 // embryo implant         |
| 22.702885      | 31.012066     | 0.006795  | NM_001163416//NM_026-1.35    |       | <b>Ptx4</b>                     | pentraxin 4                                                                      | 0007165 // signal transduction // inferred from electronic annotation//0007166 // cell surface receptor signaling pathway // not recorded//0007186 // G-protein coupled r     |
| 811.0321       | 1117.4825     | 0.0090494 | NM_009895//NM_006511:1.35    |       | <b>Cish</b>                     | cytokine inducible SH2-containing protein                                        | 0006469 // negative regulation of protein kinase activity // not recorded//0007205 // protein kinase C-activating G-protein coupled receptor signaling pathway // inferred fr |
| 66.45433       | 89.63028      | 0.0084703 | NM_138650//NM_006521:1.36    |       | <b>Dgkg</b>                     | diacylglycerol kinase, gamma                                                     | 0007205 // protein kinase C                                                                                                                                                   |

| [C3H/HeN][raw] | [Gsr-KO][raw] | p [Corr]  | RefSeq Transcript ID  | FD   | Gene Symbol         | Gene Title                                                                          | Gene Ontology Biological Process                                                                                                                                                 |
|----------------|---------------|-----------|-----------------------|------|---------------------|-------------------------------------------------------------------------------------|----------------------------------------------------------------------------------------------------------------------------------------------------------------------------------|
| 1245.1687      | 1703.9156     | 0.009277  | NM_009546             | 1.37 | <b>Trim25</b>       | tripartite motif-containing 25                                                      | 0002376 // immune system process // inferred from electronic annotation//0006513 // protein monoubiquitination // not recorded//0016567 // protein ubiquitination // r           |
| 594.5504       | 826.9116      | 0.0090404 | NM_029436//NM_006522  | 1.37 | <b>Klh24</b>        | kelch-like 24                                                                       | 0016567 // protein ubiquitination // not recorded//2000312 // regulation of kainate selective glutamate receptor activity // inferred from electronic annotation                 |
| 3685.1448      | 4951.9624     | 0.0090933 | NM_001311139//NM_021  | 1.38 | <b>Denn25a</b>      | DENN/MADD domain containing 5A                                                      | 0042147 // retrograde transport, endosome to Golgi // not recorded//0043547 // positive regulation of GTPase activity // not recorded//0050982 // detection of mechan            |
| 62.927673      | 86.436516     | 0.0066193 | NM_033373             | 1.38 | <b>Krt23</b>        | keratin 23                                                                          |                                                                                                                                                                                  |
| 563.57434      | 794.2354      | 0.0065811 | NM_023184//NM_006506  | 1.38 | <b>Klf15</b>        | Kruppel-like factor 15                                                              | 0006351 // transcription, DNA-templated // inferred from electronic annotation//0006355 // regulation of transcription, DNA-templated // inferred from electronic annotat        |
| 17.127337      | 23.416132     | 0.0097449 | NM_001271548          | 1.38 | <b>Gm715</b>        | predicted gene 715                                                                  |                                                                                                                                                                                  |
| 229.91357      | 319.22418     | 0.0085589 | NM_011785//NM_006496  | 1.39 | <b>Akt3</b>         | thymoma viral proto-oncogene 3                                                      | 0000002 // mitochondrial genome maintenance // not recorded//0006468 // protein phosphorylation // not recorded//0007165 // signal transduction // not recorded//0               |
| 794.88605      | 1051.2301     | 0.0085589 | NM_173007//NM_006505  | 1.39 | <b>Tspan12</b>      | tetraspanin 12                                                                      | 0001525 // angiogenesis // inferred from electronic annotation//0007166 // cell surface receptor signaling pathway // inferred from mutant phenotype//0010842 // retina          |
| 428.76416      | 605.016       | 0.0085912 | NM_015774             | 1.39 | <b>Erol1</b>        | ER01-like (5. cerevisiae)                                                           | 0006457 // protein folding // inferred from direct assay//0006457 // protein folding // not recorded//0006810 // transport // inferred from electronic annotation//000691        |
| 1174.5762      | 1631.48       | 0.0085929 | NM_001282037//NM_001  | 1.39 | <b>Sh3gbp1</b>      | SH3-domain GRB2-like B1 (endorphin)                                                 | 0006654 // phosphatidic acid biosynthetic process // inferred from direct assay//0006915 // apoptotic process // not recorded//0007005 // mitochondrion organization //          |
| 134.8787       | 186.56053     | 0.0071764 | NM_001038664//NM_001  | 1.39 | <b>Gngt2</b>        | guanine nucleotide binding protein (G-protein), gamma transducing activity polypept | 0007165 // signal transduction // inferred from electronic annotation//0007186 // G-protein coupled receptor signaling pathway // inferred from electronic annotation//00        |
| 44.941517      | 63.028168     | 0.0068828 | NM_008216             | 1.40 | <b>Has2</b>         | hyaluronan synthase 2                                                               | 0001570 // vasculogenesis // inferred from mutant phenotype//0001822 // kidney development // inferred from electronic annotation//0007155 // cell adhesion // not rec           |
| 212.50111      | 301.28427     | 0.0089693 | NM_144835             | 1.40 | <b>Heatr1</b>       | HEAT repeat containing 1                                                            | 0004662 // maturation of SSU-rRNA from tritestic rRNA transcript (SSU-rRNA, 5.8S rRNA, LSU-rRNA) // not recorded//0004594 // positive regulation of transcription from           |
| 96.12715       | 133.59744     | 0.0093601 | NM_177003//NM_006506  | 1.40 | <b>Tigrr</b>        | Trp53 induced glycolysis regulatory phosphatase                                     | 0002931 // response to ischemia // inferred from direct assay//0006003 // fructose 2,6-bisphosphate metabolic process // inferred from mutant phenotype//0006003 // fr           |
| 455.28         | 650.57495     | 0.0086932 | NM_175212//NM_006521  | 1.41 | <b>Tmem65</b>       | transmembrane protein 65                                                            | 0003231 // cardiac ventricle development // inferred from mutant phenotype//1903779 // regulation of cardiac conduction // inferred from mutant phenotype                        |
| 54.8639        | 76.7919       | 0.0097449 | NM_175164//NM_006526  | 1.41 | <b>Arhgap26</b>     | Rho GTPase activating protein 26                                                    | 0007165 // signal transduction // inferred from electronic annotation//0003036 // actin cytoskeleton organization // inferred from electronic annotation//0043547 // post        |
| 182.2649       | 256.9377      | 0.0087842 | NM_172594//NM_006517  | 1.41 | <b>Dhx29</b>        | DEAH (Asp-Glu-Ala-His) box polypeptide 29                                           | 0006396 // RNA processing // not recorded//0006412 // translation // inferred from electronic annotation//0006413 // translational initiation // inferred from electronic an     |
| 80.38777       | 112.50596     | 0.0066692 | NM_023179//NM_006524  | 1.42 | <b>Atp6v1g2</b>     | ATPase, H+ transporting, lysosomal V1 subunit G2                                    | 0006810 // transport // inferred from electronic annotation//0006811 // ion transport // inferred from electronic annotation//0015992 // proton transport // inferred fr         |
| 650.73926      | 943.386       | 0.0088565 | NM_001001932//NM_006  | 1.42 | <b>Ecal1</b>        | early endosome antigen 1                                                            | 0006897 // endocytosis // not recorded//0006906 // vesicle fusion // not recorded                                                                                                |
| 57.99307       | 82.49462      | 0.0068697 | NM_010658             | 1.43 | <b>Mafb</b>         | v-maf musculoaponeurotic fibrosarcoma oncogene family, protein B (avian)            | 0006351 // transcription, DNA-templated // inferred from electronic annotation//0006355 // regulation of transcription, DNA-templated // inferred from electronic annota         |
| 3197.828       | 4456.845      | 0.0073042 | NM_013885             | 1.43 | <b>Clic4</b>        | chloride intracellular channel 4 (mitochondrial)                                    | 0001525 // angiogenesis // inferred from mutant phenotype//0001886 // endothelial cell morphogenesis // inferred from mutant phenotype//0006749 // glutathione met               |
| 116.78553      | 163.30927     | 0.0098651 |                       | 1.43 | <b>Al449212</b>     | expressed sequence AA49212                                                          |                                                                                                                                                                                  |
| 45.295162      | 65.43218      | 0.0092128 | NM_029662//NM_006503  | 1.44 | <b>Mfsd2a</b>       | major facilitator superfamily domain containing 2A                                  | 0006810 // transport // inferred from electronic annotation//0006869 // lipid transport // inferred from electronic annotation//0015908 // fatty acid transport // inferred f    |
| 378.74136      | 554.9958      | 0.0097449 | NM_023245             | 1.44 | <b>Palmd</b>        | palmelphin                                                                          | 0008360 // regulation of cell shape // inferred from electronic annotation                                                                                                       |
| 248.25574      | 363.1429      | 0.0068697 | NM_001284410//NM_001  | 1.44 | <b>Bcl2l1</b>       | BCL2-like 11 (apoptosis facilitator)                                                | 0001701 // in utero embryonic development // inferred from genetic interaction//0001776 // leukocyte homeostasis // inferred from genetic interaction//0001776 // leuk           |
| 42.71785       | 61.716022     | 0.0074312 | NM_001033543//NM_001  | 1.44 | <b>I20rb</b>        | interleukin 20 receptor beta                                                        | 0001808 // negative regulation of type IV hypersensitivity // inferred from mutant phenotype//0002437 // inflammatory response to antigenic stimulus // inferred from mut        |
| 179.06792      | 258.5797      | 0.0095919 | NM_008803             | 1.44 | <b>Pde8a</b>        | phosphodiesterase 8A                                                                | 0006198 // CAP catalytic process // inferred from electronic annotation//0006355 // regulation of transcription, DNA-templated // inferred from electronic annotation//          |
| 310.81885      | 455.7374      | 0.0063393 | NM_001081289//NM_011  | 1.44 | <b>Fam217b</b>      | family with sequence similarity 217, member B                                       |                                                                                                                                                                                  |
| 197.53992      | 286.7513      | 0.0089693 | NM_199476//NM_006520  | 1.44 | <b>Rrm2b</b>        | ribonucleotide reductase M2 B (TP53 inducible)                                      | 0001822 // kidney development // inferred from mutant phenotype//0003014 // renal system process // inferred from mutant phenotype//0006260 // DNA replication // i              |
| 200.43422      | 289.20087     | 0.0065811 | NM_026189//NM_006510  | 1.44 | <b>Eepd1</b>        | endonuclease/exonuclease/phosphatase family domain containing 1                     | 0006281 // DNA repair // inferred from electronic annotation                                                                                                                     |
| 600.12067      | 883.69226     | 0.0066381 | NM_001081150          | 1.45 | <b>Lonrf1</b>       | LON peptidase N-terminal domain and ring finger 1                                   | 0006508 // proteolysis // inferred from electronic annotation                                                                                                                    |
| 257.24835      | 374.889       | 0.0086932 | NM_010748//NM_006516  | 1.45 | <b>Lyst</b>         | lysosomal trafficking regulator                                                     | 0002446 // neutrophil mediated immunity // inferred from mutant phenotype//0002456 // T cell mediated immunity // inferred from mutant phenotype//0006644 // phos                |
| 93.04892       | 134.13147     | 0.0087842 | NM_001291044//NM_153  | 1.45 | <b>Nudt6</b>        | nudix (nucleoside diphosphate linked moiety X)-type motif 6                         | 0008152 // metabolic process // inferred from electronic annotation                                                                                                              |
| 1130.3108      | 1643.6276     | 0.0068697 | NM_020332             | 1.45 | <b>Ank</b>          | progressive ankylosis                                                               | 0006810 // transport // inferred from electronic annotation//0006817 // phosphate ion transport // inferred from electronic annotation//0003050 // regulation of bone m          |
| 233.0611       | 339.5931      | 0.0095588 | NM_194346//NM_006519  | 1.45 | <b>Rnf31</b>        | ring finger protein 31                                                              | 0002029 // protein polyubiquitination // not recorded//0016567 // protein ubiquitination // inferred from mutant phenotype//0023035 // CD40 signaling pathway // infer           |
| 106.98278      | 152.94997     | 0.0068697 | NM_027268//NM_006506  | 1.45 | <b>Scrn1</b>        | sceremin 1                                                                          | 0006508 // proteolysis // inferred from electronic annotation//0006887 // exocytosis // not recorded                                                                             |
| 543.9085       | 809.5623      | 0.0085929 | NM_001168304//NM_001  | 1.45 | <b>Cdk19</b>        | cyclin-dependent kinase 19                                                          | 0006468 // protein phosphorylation // inferred from electronic annotation//0016310 // phosphorylation // inferred from electronic annotation//0043065 // positive regul          |
| 641.10004      | 947.8447      | 0.0089693 | NM_00114328//NM_001   | 1.45 | <b>Ccp1</b>         | cell cycle progression 1                                                            | 0007049 // cell cycle // inferred from electronic annotation//0008284 // positive regulation of cell proliferation // not recorded//0045787 // positive regulation of cell cycle |
| 351.78738      | 521.0859      | 0.0071527 | NM_016979//NM_006527  | 1.46 | <b>Prkx</b>         | protein kinase, X-linked                                                            | 0001525 // angiogenesis // inferred from mutant phenotype//0001525 // angiogenesis // not recorded//0001935 // endothelial cell proliferation // inferred from mutant pl         |
| 894.04285      | 1319.0879     | 0.0065467 | NM_009230//NM_006496  | 1.46 | <b>Soc11</b>        | sterol O acyltransferase 1                                                          | 0006629 // lipid metabolic process // inferred from electronic annotation//0006202 // steroid metabolic process // inferred from electronic annotation//0008203 // chole         |
| 73.11238       | 106.71129     | 0.008644  | NM_001301353//NM_001  | 1.46 | <b>Apod</b>         | apolipoprotein D                                                                    | 0003002 // response to reactive oxygen species // inferred from mutant phenotype//0003002 // response to reactive oxygen species // not recorded//0006006 // glucose             |
| 18.808596      | 27.400504     | 0.0066908 | NM_021396//NM_011247  | 1.46 | <b>Ptcd1lg2</b>     | programmed cell death 1 ligand 2                                                    | 0003269 // negative regulation of interferon-gamma production // not recorded//0032693 // negative regulation of interleukin-10 production // not recorded//0042102 //           |
| 217.91795      | 321.52707     | 0.0093601 | NM_199143             | 1.46 | <b>Znf7</b>         | zinc and ring finger 2                                                              | 0016567 // protein ubiquitination // inferred from electronic annotation//0016567 // protein ubiquitination //                                                                   |
| 1454.3673      | 2134.1619     | 0.0075048 | NM_008247//NM_008903  | 1.46 | <b>Pfip1</b>        | phospholipid phosphatase 1                                                          | 0006470 // protein dephosphorylation // inferred from direct assay//0006470 // protein dephosphorylation // traceable author statement//0006629 // lipid metabolic pro           |
| 196.24185      | 288.03326     | 0.0081374 | NM_001136260//NM_001  | 1.47 | <b>Slc4a4</b>       | solute carrier family 4 (anion exchanger), member 4                                 | 0006810 // transport // inferred from electronic annotation//0006811 // ion transport // inferred from electronic annotation//0006814 // sodium ion transport // infer           |
| 384.40848      | 573.86365     | 0.0046966 | NM_133685             | 1.47 | <b>Rab31</b>        | RAB31, member RAS oncogene family                                                   | 0007264 // small GTPase mediated signal transduction // inferred from electronic annotation//0015031 // protein transport // inferred from electronic annotation//000316         |
| 144.78069      | 210.86339     | 0.0085929 | NM_026159             | 1.47 | <b>Retsat</b>       | retinol saturase (all trans retinol 13,14 reductase)                                | 0042572 // retinol metabolic process // inferred from direct assay//0055114 // oxidation-reduction process // inferred from direct assay                                         |
| 2533.167       | 3620.76       | 0.0070902 | NM_025427             | 1.47 | <b>Rgcc</b>         | regulator of cell cycle                                                             | 0000082 // G1/S transition of mitotic cell cycle // not recorded//0001100 // negative regulation of exit from mitosis // not recorded//0001937 // negative regulation of end     |
| 236.28764      | 350.01755     | 0.0087842 | NM_001001176//NM_001  | 1.47 | <b>Taf9b</b>        | TAF9B RNA polymerase II, TATA box binding protein (TBP)-associated factor           | 0000122 // negative regulation of transcription from RNA polymerase II promoter // not recorded//0006351 // transcription, DNA-templated // inferred from electronic ann         |
| 502.5029       | 756.82007     | 0.0083164 | NM_001310483//NM_026  | 1.48 | <b>Lmbrd1</b>       | LMBR1 domain containing 1                                                           | 0006810 // transport // inferred from electronic annotation//0038016 // insulin receptor internalization // inferred from mutant phenotype//0043408 // regulation of MAF         |
| 16.762423      | 24.5432       | 0.0096864 | NM_025458             | 1.48 | <b>Tmed6</b>        | transmembrane emp24 protein transport domain containing 6                           | 0006810 // transport // inferred from electronic annotation                                                                                                                      |
| 535.0716       | 808.76697     | 0.0070902 | NM_001012477//NM_013  | 1.48 | <b>Cxcl12</b>       | chemokine (C-X-C motif) ligand 12                                                   | 0001569 // patterning of blood vessels // inferred from mutant phenotype//0001666 // response to hypoxia // inferred from electronic annotation//0001667 // ameboidal            |
| 1185.8323      | 1744.916      | 0.0080529 | NM_008452             | 1.48 | <b>Klf2</b>         | Kruppel-like factor 2 (lung)                                                        | 0000902 // cell morphogenesis // inferred from mutant phenotype//0001701 // in utero embryonic development // inferred from mutant phenotype//0006351 // transcri                |
| 1488.0708      | 2181.5024     | 0.0082153 | NM_001039390//NM_001  | 1.48 | <b>Plg1</b>         | protein kinase inhibitor, gamma                                                     | 0001022 // negative regulation of transcription from RNA polymerase II promoter // inferred from direct assay//0006469 // negative regulation of protein kinase activity // i    |
| 127.95897      | 189.04294     | 0.0087113 | NM_001112288          | 1.48 | <b>Sco2</b>         | SCO cytochrome oxidase deficient homolog 2 (yeast)                                  | 0001654 // eye development // not recorded//0001701 // in utero embryonic development // inferred from mutant phenotype//0003032 // muscle system process // infer               |
| 10182.671      | 13806.513     | 0.0079038 | NM_008597             | 1.48 | <b>Mgp</b>          | matrix gla protein                                                                  | 0001503 // ossification // inferred from electronic annotation//0006461 // protein complex assembly // not recorded//0007275 // multicellular organismal development //          |
| 89.49908       | 132.17178     | 0.0071653 | NM_175638//NM_006534  | 1.49 | <b>Wnk4</b>         | WNK lysine deficient protein kinase 4                                               | 0006468 // protein phosphorylation // not recorded//0006811 // ion transport // inferred from direct assay//0006821 // chloride transport // inferred from direct assay//        |
| 306.64154      | 464.40405     | 0.0065811 | NM_001173732//NM_033  | 1.49 | <b>Fxyd4</b>        | FXD domain-containing ion transport regulator 4                                     | 0006810 // transport // inferred from electronic annotation//0006811 // ion transport // inferred from electronic annotation//0071805 // potassium ion transmembrane t           |
| 330.3683       | 501.64032     | 0.007891  | NM_011020//NM_006500  | 1.49 | <b>Hspa4l</b>       | heat shock protein 4 like                                                           | 0006457 // protein folding // not recorded//0006986 // response to unfolded protein // not recorded                                                                              |
| 147.20726      | 216.09126     | 0.0087842 | NM_027906//NM_173758  | 1.49 | <b>Vwa8</b>         | von Willebrand factor A domain containing 8                                         | 0008152 // metabolic process // inferred from electronic annotation                                                                                                              |
| 157.34303      | 233.03777     | 0.0065464 | NM_001136078//NM_008  | 1.49 | <b>Pitpnm1</b>      | phosphatidylinositol transfer protein, membrane-associated 1                        | 0006810 // transport // inferred from electronic annotation//0015031 // protein transport // inferred from electronic annotation                                                 |
| 14.959984      | 22.076882     | 0.0066655 | NM_001113323//NM_006  | 1.50 | <b>Gib13</b>        | galactosidase, beta 1 like 3                                                        | 0005975 // carbohydrate metabolic process // inferred from electronic annotation//0008152 // metabolic process // inferred from electronic annotation                            |
| 44.868717      | 67.032845     | 0.0086897 | NM_146063//NM_006520  | 1.50 | <b>Krt79</b>        | keratin 79                                                                          |                                                                                                                                                                                  |
| 243.57065      | 267.38373     | 0.0085573 | NM_145823//NM_006534  | 1.50 | <b>Pitpnc1</b>      | phosphatidylinositol transfer protein, cytoplasmic 1                                | 0006810 // transport // inferred from electronic annotation//0006869 // lipid transport // inferred from electronic annotation//0007165 // signal transduction // inferred f     |
| 254.70616      | 383.44003     | 0.008644  | NM_183168//NM_006574  | 1.50 | <b>P2yf6</b>        | pyrimidineric receptor P2Y, G-protein coupled 6                                     | 0007165 // signal transduction // inferred from electronic annotation//0007186 // G-protein coupled receptor signaling pathway // inferred from electronic annotation//00        |
| 2245.095       | 3252.9995     | 0.0084703 | NM_001159555//NM_001  | 1.50 | <b>Cd36</b>         | CD36 antigen                                                                        | 0000122 // negative regulation of transcription from RNA polymerase II promoter // inferred from mutant phenotype//0001676 // long-chain fatty acid metabolic process //         |
| 111.92673      | 164.87944     | 0.0088565 | NM_001163592//NM_173  | 1.50 | <b>Nhs1l</b>        | NHS-like 1                                                                          |                                                                                                                                                                                  |
| 574.3346       | 878.7723      | 0.0089296 | NM_001014390//NM_006  | 1.50 | <b>Dyrk2</b>        | dual-specificity tyrosine-(Y)-phosphorylation regulated kinase 2                    | 0006468 // protein phosphorylation // not recorded//0006915 // apoptotic process // inferred from electronic annotation//0006974 // cellular response to DNA damage st           |
| 52.1808        | 77.96289      | 0.008644  | NM_001304991//NM_001  | 1.50 | <b>Ppp3cc</b>       | protein phosphatase 3, catalytic subunit, gamma isoform                             | 0006470 // protein dephosphorylation // inferred from electronic annotation//0008152 // metabolic process // inferred from electronic annotation                                 |
| 264.1989       | 401.71225     | 0.0065811 | NM_001033066//NM_001  | 1.50 | <b>Acs1</b>         | acyl-CoA synthetase long-chain family member 3                                      | 0001676 // long-chain fatty acid metabolic process // not recorded//0006364 // rRNA processing // inferred from electronic annotation//0006629 // lipid metabolic proces         |
| 120.57515      | 179.29112     | 0.0055381 | NM_0114452            | 1.51 | <b>Serpinc9b</b>    | serine (or cysteine) peptidase inhibitor, clade B, member 9b                        | 0010951 // negative regulation of endopeptidase activity // not recorded//00019835 // cytolysis // inferred from direct assay                                                    |
| 20.280329      | 30.786303     | 0.0090404 | NM_177664             | 1.51 | <b>Plpp4r</b>       | phospholipid phosphatase related 4                                                  | 0006470 // protein dephosphorylation // inferred from electronic annotation//0006644 // phospholipid metabolic process // not recorded//0007165 // signal transduction           |
| 24.92463       | 37.962696     | 0.008843  | NM_010846//NR_003520  | 1.51 | <b>Mx1</b>          | MX dynamin-like GTPase 1                                                            | 0002376 // immune system process // inferred from electronic annotation//0008152 // metabolic process // inferred from electronic annotation//0009615 // response to             |
| 41.053307      | 62.356464     | 0.0063993 | NM_001261731//NM_007  | 1.51 | <b>Ang</b>          | angiogenin, ribonuclease, RNase A family, 5                                         | 0001525 // angiogenesis // not recorded//0001666 // response to hypoxia // not recorded//0001878 // response to yeast // inferred from direct assay//0001878 // resp             |
| 27.11057       | 202.8099      | 0.0089066 | NM_006651//NM_006506  | 1.52 | <b>Slc25a26</b>     | solute carrier family 25 (mitochondrial carrier, phosphate carrier), member 26      | 0006810 // transport // inferred from electronic annotation//0015805 // S-adenosyl-L-methionine transport // not recorded//0055085 // transmembrane transport // infer           |
| 72.89823       | 108.76453     | 0.0065464 | NM_175510//NM_006496  | 1.52 | <b>Unc80</b>        | unc-80 homolog (C. elegans)                                                         |                                                                                                                                                                                  |
| 57.70825       | 87.04559      | 0.0050895 | NM_0016671//NM_011248 | 1.52 | <b>I27ra</b>        | interleukin 27 receptor, alpha                                                      | 0002827 // positive regulation of T-helper 1 type immune response // inferred from mutant phenotype//0002829 // negative regulation of type 2 immune response // infer           |
| 309.18314      | 476.64597     | 0.0078833 | NM_021310             | 1.52 | <b>Jmy</b>          | junction-mediating and regulatory protein                                           | 0006281 // DNA repair // inferred from electronic annotation//0006357 // regulation of transcription from RNA polymerase II promoter // inferred from direct assay//000          |
| 4026.7573      | 5955.0815     | 0.0093601 | NM_001297747//NM_009  | 1.52 | <b>Btg3//Gm7334</b> | beta cell translocation gene 3//beta-cell translocation gene 3 pseudogene           | 0045930 // negative regulation of mitotic cell cycle // not recorded                                                                                                             |
| 99.91072       | 149.33043     | 0.0080529 | NM_022413//NM_006506  |      |                     |                                                                                     |                                                                                                                                                                                  |

| [C3H/HeN][raw] | [Gsr-KO][raw] | p [Corr]  | RefSeq Transcript ID  | FD   | Gene Symbol                 | Gene Title                                                                         | Gene Ontology Biological Process                                                                                                                                                |
|----------------|---------------|-----------|-----------------------|------|-----------------------------|------------------------------------------------------------------------------------|---------------------------------------------------------------------------------------------------------------------------------------------------------------------------------|
| 51.026672      | 77.96825      | 0.006897  | NM_053217             | 1.54 | <b>Ifit1b12</b>             | interferon induced protein with tetratricopeptide repeats 1B like 2                | 0051607 // defense response to virus // not recorded//0060337 // type I interferon signaling pathway // not recorded                                                            |
| 31.62727       | 49.09779      | 0.009128  | NM_011517             | 1.54 | <b>Sycp3</b>                | synaptonemal complex protein 3                                                     | 000711 // meiotic DNA repair synthesis // inferred from genetic interaction//0007049 // cell cycle // inferred from electronic annotation//0007066 // female meiosis site       |
| 260.79916      | 405.91647     | 0.008029  | NM_029600//NM_006534  | 1.54 | <b>Abcc3</b>                | ATP-binding cassette, sub-family C (CFTR/MRP), member 3                            | 0006810 // transport // inferred from electronic annotation//0006855 // drug transmembrane transport // not recorded//0008152 // metabolic process // inferred from elc         |
| 298.12338      | 467.93085     | 0.007042  | NM_177644//NM_006496  | 1.55 | <b>Rasa12</b>               | RAS protein activator like 2                                                       | 0007165 // signal transduction // inferred from electronic annotation//0043087 // regulation of GTPase activity // inferred from electronic annotation//0043547 // positive     |
| 10228.742      | 14190.378     | 0.008963  | NM_011402//NM_006503  | 1.55 | <b>Slc34a2</b>              | solute carrier family 34 (sodium phosphate), member 2                              | 0001701 // in utero embryonic development // inferred from mutant phenotype//0006810 // transport // inferred from electronic annotation//0006811 // ion transport //           |
| 114.79747      | 176.1562      | 0.0029632 | NM_001243857//NM_0061 | 1.55 | <b>Fam124a</b>              | family with sequence similarity 124, member A                                      |                                                                                                                                                                                 |
| 598.01666      | 942.25476     | 0.0056277 | NM_001290475//NM_146  | 1.55 | <b>Tdrd7</b>                | tudor domain containing 7                                                          | 0002089 // lens morphogenesis in camera-type eye // inferred from mutant phenotype//0002089 // lens morphogenesis in camera-type eye // not recorded//0007275 // n              |
| 60.331367      | 92.50227      | 0.0070902 | NM_145700//NM_006511  | 1.55 | <b>Ackr4</b>                | atypical chemokine receptor 4                                                      | 0006988 // receptor-mediated endocytosis // inferred from electronic annotation//0006935 // chemotaxis // inferred from electronic annotation//0007165 // signal tran           |
| 179.84302      | 279.86804     | 0.0084158 | NM_013512//NM_006525  | 1.56 | <b>Epb414a</b>              | erythrocyte membrane protein band 4.1 like 4a                                      | 0006810 // transport // inferred from electronic annotation//0006811 // ion transport // inferred from electronic annotation//0006814 // sodium ion transport // inferred       |
| 702.30115      | 1117.7863     | 0.0081374 | NM_029415//NM_006535  | 1.56 | <b>Slc10a6</b>              | solute carrier family 10 (sodium/bile acid cotransporter family), member 6         | 0007186 // G-protein coupled receptor signaling pathway // inferred from direct assay//0009968 // negative regulation of signal transduction // inferred from electronic an     |
| 53.557236      | 83.59173      | 0.0068707 | NM_029879//NM_006517  | 1.56 | <b>Rgs7bp</b>               | regulator of G-protein signaling 7 binding protein                                 |                                                                                                                                                                                 |
| 45.991867      | 71.748886     | 0.0065811 | KR_879970//KR_879971  | 1.56 | <b>Tnfrsf130s</b>           | tumor necrosis factor (ligand) superfamily, member 13, opposite strand             |                                                                                                                                                                                 |
| 256.32257      | 406.12448     | 0.0070902 | NM_133222             | 1.56 | <b>Adgr4</b>                | adhesion G-protein-coupled receptor L4                                             | 0007165 // signal transduction // inferred from electronic annotation//0007166 // cell surface receptor signaling pathway // inferred from electronic annotation//0007186       |
| 417.68076      | 607.65866     | 0.0076866 | NM_027045//NM_028407  | 1.57 | <b>Cs2er2</b>               | collel-coil serine rich 2                                                          | 0001578 // microtubule bundle formation // inferred from direct assay                                                                                                           |
| 457.5074       | 731.3009      | 0.0093543 | NM_001159662//NM_153  | 1.57 | <b>Ppp1r16b</b>             | protein phosphatase 1, regulatory (inhibitor) subunit 16B                          | 0001938 // positive regulation of endothelial cell proliferation // not recorded//0014066 // regulation of phosphatidylinositol 3-kinase signaling // not recorded//0035307     |
| 524.3498       | 836.8029      | 0.0071764 | NM_001289686//NM_001  | 1.57 | <b>Arhgef3</b>              | Rho guanine nucleotide exchange factor (GEF) 3                                     | 0035023 // regulation of Rho protein signal transduction // inferred from electronic annotation//0035556 // intracellular signal transduction // inferred from electronic anc   |
| 157.84517      | 247.81845     | 0.004449  | NM_001113399//NM_001  | 1.57 | <b>Zfp385b</b>              | zinc finger protein 385B                                                           | 0006915 // apoptotic process // inferred from electronic annotation//0072332 // intrinsic apoptotic signaling pathway by p53 class mediator // not recorded                     |
| 164.14583      | 255.5532      | 0.008832  | NM_127247//NM_006507  | 1.57 | <b>Kctd13</b>               | potassium channel tetramerisation domain containing 13                             | 0006260 // DNA replication // not recorded//0016477 // cell migration // not recorded//0016567 // protein ubiquitination // not recorded//0035024 // negative regulato          |
| 66.97553       | 104.81528     | 0.0080529 | NM_027853             | 1.58 | <b>Mettl7b</b>              | methyltransferase like 7B                                                          | 0008152 // metabolic process // inferred from electronic annotation//0032259 // methylation // not recorded                                                                     |
| 54.048714      | 85.03915      | 0.0080529 | NM_001159748//NM_011  | 1.58 | <b>Serpinb8</b>             | serine (or cysteine) peptidase inhibitor, clade B, member 8                        | 0010466 // negative regulation of peptidase activity // inferred from electronic annotation//0010951 // negative regulation of endopeptidase activity // not recorded           |
| 116.56869      | 181.12389     | 0.0056661 | NM_145227//NM_006530  | 1.58 | <b>Oas2</b>                 | 2'-5' oligoadenylate synthetase 2                                                  | 0002376 // immune system process // inferred from electronic annotation//0006164 // purine nucleotide biosynthetic process // not recorded//0006401 // RNA catabolic;           |
| 1460.8104      | 2282.8374     | 0.0046966 | NM_001111049//NM_001  | 1.58 | <b>Cd151</b>                | CD151 antigen                                                                      | 0007165 // signal transduction // inferred from electronic annotation//0007186 // G-protein coupled receptor signaling pathway // inferred from electronic annotation           |
| 741.03394      | 1188.6788     | 0.0080529 | NM_025809             | 1.58 | <b>Clec14a</b>              | C-type lectin domain family 14, member A                                           | 0001656 // metanephros development // inferred from genetic interaction//0001656 // metanephros development // inferred from mutant phenotype//0001822 // kidney                |
| 119.15102      | 189.09705     | 0.0063393 | NM_001038703//NM_030  | 1.58 | <b>Gpr146//D830046C22Rk</b> | G-protein-coupled receptor 146//RIKEN cDNA D830046C22 gene                         | 0006725 // cellular aromatic compound metabolic process // inferred from mutant phenotype//0009636 // response to toxic substance // inferred from electronic annotati          |
| 2058.5842      | 3198.422      | 0.0079403 | NM_001001309//NM_0064 | 1.58 | <b>Itga8</b>                | integrin alpha 8                                                                   | 0010224 // response to UV-B // inferred from electronic annotation//0018149 // peptide cross-linking // inferred from electronic annotation//0018153 // isopeptide cross-       |
| 520.95087      | 845.1952      | 0.0083887 | NM_001312918//NM_010  | 1.58 | <b>Ephx1</b>                | epoxide hydrolase 1, microsomal                                                    | 0007517 // muscle organ development // inferred from electronic annotation//0048747 // muscle fiber development // inferred from mutant phenotype//0050513 // card              |
| 33.204273      | 53.26761      | 0.0046248 | NM_008412//NM_006501  | 1.59 | <b>Ivl</b>                  | involucrin                                                                         |                                                                                                                                                                                 |
| 673.5006       | 1087.4612     | 0.0080202 | NM_029620             | 1.59 | <b>Pcalce2</b>              | procollagen C-endopeptidase enhancer 2                                             |                                                                                                                                                                                 |
| 73.70373       | 116.90313     | 0.0066692 | NM_029612//NM_006497  | 1.59 | <b>Slamf9</b>               | SLAM family member 9                                                               |                                                                                                                                                                                 |
| 305.36475      | 492.87463     | 0.0075124 | NM_011890             | 1.59 | <b>Sgcb</b>                 | sarcoglycan, beta (dystrophin-associated glycoprotein)                             |                                                                                                                                                                                 |
| 136.96667      | 215.83388     | 0.0099354 | NM_026626             | 1.59 | <b>Efcab2</b>               | EF-hand calcium binding domain 2                                                   |                                                                                                                                                                                 |
| 350.704        | 567.84186     | 0.0084664 | NM_175518//NM_006537  | 1.59 | <b>Tmem245</b>              | transmembrane protein 245                                                          |                                                                                                                                                                                 |
| 20.654604      | 33.078217     | 0.0065754 |                       | 1.59 | <b>Tcrg-C1//Tcrg-C2</b>     | T cell receptor gamma, constant 1//T-cell receptor gamma, constant 2               |                                                                                                                                                                                 |
| 1655.2462      | 2600.2366     | 0.0071653 | NM_001130458//NM_001  | 1.60 | <b>Tcn2</b>                 | transcobalamin 2                                                                   | 0048873 // homeostasis of number of cells within a tissue // inferred from mutant phenotype                                                                                     |
| 1298.8452      | 2052.0845     | 0.0080529 | NM_010638             | 1.60 | <b>Klf9</b>                 | Kruppel-like factor 9                                                              | 0006810 // transport // inferred from electronic annotation//0006811 // ion transport // inferred from electronic annotation//0006824 // cobalt ion transport // inferred fi    |
| 568.46454      | 925.88586     | 0.0090012 | NM_009443//NM_009444  | 1.60 | <b>Tgolin1//Tgolin2</b>     | trans-golgi network protein//trans-golgi network protein 2                         | 0006351 // transcription, DNA-templated // inferred from electronic annotation//0006355 // regulation of transcription, DNA-templated // inferred from direct assay//000        |
| 282.7969       | 1336.2534     | 0.0090404 | NM_001039562//NM_0061 | 1.60 | <b>Ankrd37</b>              | ankyrin repeat domain 37                                                           | 0006895 // Golgi to endosome transport // not recorded                                                                                                                          |
| 2382.7917      | 3764.5945     | 0.0088671 | NM_001013296//NM_013  | 1.60 | <b>Hacd1</b>                | 3-hydroxyacyl-CoA dehydrogenase 1                                                  | 0006629 // lipid metabolic process // inferred from electronic annotation//0006631 // fatty acid metabolic process // inferred from electronic annotation//0006633 // fatt      |
| 136.20184      | 214.4599      | 0.0058589 | NM_008105//NM_023887  | 1.60 | <b>Gcn2c</b>                | glucosaminyl (N-acetyl) transferase 2, I-branched enzyme                           | 0005486 // protein glycosylation // not recorded//0007179 // transforming growth factor beta receptor signaling pathway // inferred from mutant phenotype//0007179 //           |
| 129.9166       | 204.78058     | 0.0066908 | NM_008381             | 1.60 | <b>Inhbb</b>                | inhibin beta-B                                                                     | 0001654 // eye development // traceable author statement//000287 // cellular response to starvation // inferred from expression pattern//0009612 // response to mech.           |
| 84.38545       | 132.56483     | 0.0058111 | NM_019510//NM_006535  | 1.60 | <b>Tp3c</b>                 | transient receptor potential cation channel, subfamily C, member 3                 | 0006810 // transport // inferred from electronic annotation//0006811 // ion transport // inferred from electronic annotation//0006816 // calcium ion transport // inferre       |
| 1063.3546      | 1711.0933     | 0.009452  | NM_00116420//NM_013   | 1.61 | <b>Vldlr</b>                | very low density lipoprotein receptor                                              | 0000122 // negative regulation of transcription from RNA polymerase II promoter // inferred from mutant phenotype//0001666 // response to hypoxia // inferred from elec         |
| 44.73098       | 71.795074     | 0.003657  | NM_021334//NR_378219  | 1.61 | <b>ItgaX</b>                | integrin alpha X                                                                   | 0007155 // cell adhesion // inferred from electronic annotation//0007229 // integrin-mediated signaling pathway // inferred from electronic annotation//0034113 // heter        |
| 103.922424     | 165.2464      | 0.0062819 | NM_001289740//NM_001  | 1.62 | <b>Mturm</b>                | maturnin, neural progenitor differentiation regulator homolog (Xenopus)            | 0007275 // multicellular organismal development // inferred from electronic annotation//0048666 // neuron development // inferred from sequence or structural simil             |
| 1211.821       | 1947.1868     | 0.0084354 | NM_007520//NM_006522  | 1.62 | <b>Bach1</b>                | BTB and CNC homology 1                                                             | 0000083 // regulation of transcription involved in G1/S transition of mitotic cell cycle // not recorded//0000117 // regulation of transcription involved in G2/M transition of |
| 3585.2346      | 5610.445      | 0.0097449 | NM_001289782//NM_001  | 1.62 | <b>Cryab</b>                | crystallin, alpha B                                                                | 0001666 // response to hypoxia // inferred from mutant phenotype//0002088 // lens development // inferred from genetic interaction//0006457 // prc                              |
| 255.14734      | 418.67978     | 0.006897  | NM_172689             | 1.62 | <b>Ddx58</b>                | DEAD (Asp-Glu-Ala-Asp) box polypeptide 58                                          | 0002230 // positive regulation of defense response to virus by host // not recorded//0002376 // immune system process // inferred from electronic annotation//0008152 //        |
| 671.4385       | 1107.8151     | 0.0086932 | NM_009320//NM_006505  | 1.63 | <b>Slc6a6</b>               | solute carrier family 6 (neurotransmitter transporter, taurine), member 6          | 0001762 // beta-alanine transport // inferred from direct assay//0006810 // transport // inferred from electronic annotation//0006836 // neurotransmitter transport // inf      |
| 326.3001       | 537.4946      | 0.0085208 | NM_028421//NM_028864  | 1.63 | <b>Zc3hav1</b>              | zinc finger CCHC type, antiviral 1                                                 | 0002376 // immune system process // inferred from electronic annotation//0008152 // metabolic process // inferred from electronic annotation//0009615 // response to            |
| 152.39314      | 245.42938     | 0.0096878 | NM_001145978//KR_3831 | 1.63 | <b>Parp4</b>                | poly (ADP-ribose) polymerase family, member 4                                      | 0006464 // cell cycle protein modification process // not recorded//0006471 // protein ADP-ribosylation // inferred from electronic annotation//0006954 // inflammatory re      |
| 1952.652       | 3163.9395     | 0.0084323 | NM_001287256//NM_011  | 1.64 | <b>Prmp</b>                 | prion protein                                                                      | 0001933 // negative regulation of protein phosphorylation // inferred from mutant phenotype//0006139 // nucleobase-containing compound metabolic process // traceabl            |
| 309.9866       | 513.1897      | 0.0075737 | NM_008580//NM_006512  | 1.64 | <b>Map3k5</b>               | mitogen-activated protein kinase kinase kinase 5                                   | 0000165 // MAPK cascade // not recorded//0000186 // activation of MAPK activity // not recorded//0000187 // activation of MAPK activity // inferred from direct assay,          |
| 806.08704      | 1336.9982     | 0.0030131 | NM_028757//NM_006497  | 1.64 | <b>Nebi</b>                 | nebulin                                                                            | 0071691 // cardiac muscle thin filament assembly // inferred from sequence or structural similarity                                                                             |
| 1660.4001      | 2668.2544     | 0.0066692 | NM_011326//NM_006507  | 1.64 | <b>Scnn1g</b>               | sodium channel, nonvoltage-gated J gamma                                           | 0006810 // transport // inferred from electronic annotation//0006811 // ion transport // inferred from electronic annotation//0006814 // sodium ion transport // inferre        |
| 32.117317      | 53.55617      | 0.0065276 | NM_177304//NM_006509  | 1.65 | <b>Enpp6</b>                | ectonucleotide pyrophosphatase/phosphodiesterase 6                                 | 0006629 // lipid metabolic process // not recorded//0008152 // metabolic process // inferred from electronic annotation//0016042 // lipid catabolic process // inferred fr      |
| 319.5472       | 531.4907      | 0.0095588 | NM_025831//NM_006516  | 1.65 | <b>Pxd1</b>                 | Px domain containing 1                                                             |                                                                                                                                                                                 |
| 93.669235      | 151.5203      | 0.0093601 | NM_001024478//NM_0061 | 1.65 | <b>Cdhr3</b>                | cadherin-related family member 3                                                   | 0007155 // cell adhesion // inferred from electronic annotation//0007156 // homophilic cell adhesion via plasma membrane adhesion molecules // inferred from electronic         |
| 159.03163      | 260.33548     | 0.0075048 | NM_001177571//NM_001  | 1.65 | <b>Ccdc162</b>              | collel-coil domain containing 162                                                  |                                                                                                                                                                                 |
| 987.3046       | 1643.0605     | 0.0098684 | NM_001291190//NM_177  | 1.65 | <b>Ssh2</b>                 | slingshot homolog 2 (Drosophila)                                                   | 0006470 // protein dephosphorylation // not recorded//0008064 // regulation of actin polymerization or depolymerization // not recorded//0010591 // regulation of lame          |
| 707.95465      | 1193.0107     | 0.0080529 | NM_133897//NM_006534  | 1.65 | <b>Lrrc8c</b>               | leucine rich repeat containing 8 family, member C                                  | 0006810 // transport // inferred from electronic annotation//0006811 // ion transport // inferred from electronic annotation//0005444 // fat cell differentiation // inferred   |
| 44.343937      | 73.260445     | 0.0080529 | NM_133868             | 1.65 | <b>Lrrc4</b>                | leucine rich repeat containing 4                                                   | 0005087 // regulation of synapse organization // inferred from mutant phenotype//0005088 // synapse organization // inferred from direct assay//0097119 // postsynapti          |
| 147.0674       | 239.3405      | 0.0096679 | NM_029094//NM_006511  | 1.65 | <b>Plk3cb</b>               | phosphatidylinositol 3-kinase, catalytic, beta polypeptide                         | 0001935 // endothelial cell proliferation // inferred from mutant phenotype//0001952 // regulation of cell-matrix adhesion // inferred from mutant phenotype//0001952 //        |
| 118.88309      | 192.06656     | 0.0096878 | NM_027629//NM_006508  | 1.65 | <b>Pgm2l1</b>               | phosphoglucomutase 2-like 1                                                        | 0005975 // carbohydrate metabolic process // inferred from electronic annotation//0005978 // glycogen biosynthetic process // --//0006006 // glucose metabolic proces           |
| 759.157        | 1269.0675     | 0.0088671 | NM_010234             | 1.65 | <b>Fos</b>                  | FBJ osteosarcoma oncogene                                                          | 0001661 // conditioned taste aversion // inferred from electronic annotation//0006355 // regulation of transcription, DNA-templated // inferred from direct assay//000631       |
| 2042.41571     | 3322.41139    | 0.0066908 | NM_001159518//NM_008  | 1.65 | <b>Igf1bp7</b>              | insulin-like growth factor binding protein 7                                       | 0001558 // regulation of cell growth // inferred from electronic annotation//0007155 // cell adhesion // not recorded//004839 // inner ear development // inferred from         |
| 28.98437       | 48.55488      | 0.0097449 | NM_001136181//NM_0061 | 1.66 | <b>Hsbp11</b>               | heat shock factor binding protein 1-like 1                                         |                                                                                                                                                                                 |
| 1176.2095      | 1945.0859     | 0.0075984 | NM_001039175//NM_001  | 1.66 | <b>Elov1</b>                | elongation of very long chain fatty acids (FEN1/Elo2, SUR4/Elo3, yeast)-like 1     | 0006629 // lipid metabolic process // inferred from electronic annotation//0006631 // fatty acid metabolic process // inferred from electronic annotation//0006633 // fatt      |
| 31.653519      | 52.989143     | 0.0070902 | NM_001271716//NM_001  | 1.66 | <b>Mct2</b>                 | monocarboxylate 2 receptor                                                         | 0001890 // placenta development // inferred from electronic annotation//0007165 // signal transduction // inferred from electronic annotation//0007186 // G-protein cou         |
| 59.853203      | 98.29669      | 0.004326  | NM_001272239//NM_177  | 1.66 | <b>Zmat4</b>                | zinc finger, matrix type 4                                                         | 0072332 // intrinsic apoptotic signaling pathway by p53 class mediator // not recorded                                                                                          |
| 393.0927       | 665.1955      | 0.0029632 | NM_025833             | 1.66 | <b>Balap2l1</b>             | BAL-associated protein 2-like 1                                                    | 0007009 // plasma membrane organization // inferred from electronic annotation//0008286 // insulin receptor signaling pathway // not recorded//0009617 // response to           |
| 493.04117      | 834.1128      | 0.0064729 | NM_001160018//NM_001  | 1.66 | <b>Tor1aip1</b>             | TOR1A interacting protein 1                                                        | 0032781 // positive regulation of ATPase activity // not recorded//0034504 // protein localization to nucleus // inferred from mutant phenotype//0071763 // nuclear mem         |
| 1778.2186      | 2918.9375     | 0.0059002 | NM_175930//NM_006515  | 1.67 | <b>Rapgef5</b>              | Rap guanine nucleotide exchange factor (GEF) 5                                     | 0007264 // small GTPase mediated signal transduction // inferred from electronic annotation//0003556 // intracellular signal transduction // inferred from electronic annot     |
| 291.30316      | 494.9083      | 0.0058111 | NM_001302376//NM_001  | 1.67 | <b>Ccr12</b>                | chemokine (C-C motif) receptor-like 2                                              | 0006935 // chemotaxis // inferred from electronic annotation//0006954 // inflammatory response // inferred from direct assay//0007165 // signal transduction // inferre         |
| 83.08191       | 135.89091     | 0.008149  | NM_001033443//NM_0061 | 1.67 | <b>Cdk1k</b>                | cyclin-dependent kinase-like 4                                                     | 0006468 // protein phosphorylation // inferred from electronic annotation//0016310 // phosphorylation // inferred from electronic annotation//0051726 // regulation of c        |
| 34.206284      | 57.88053      | 0.0081374 | NM_001033922//NM_001  | 1.68 | <b>Trem14</b>               | triggering receptor expressed on myeloid cells-like 4                              | 002457 // T cell antigen processing and presentation // inferred from mutant phenotype//0006911 // phagocytosis, engulfment // inferred from direct assay                       |
| 58.479546      | 97.6004       | 0.0065754 | NM_0010131741         | 1.68 | <b>Ddn</b>                  | dendrin                                                                            | 0045944 // positive regulation of transcription from RNA polymerase II promoter // not recorded                                                                                 |
| 255.40147      | 432.5907      | 0.0065464 | NM_001033348//NM_0061 | 1.68 | <b>Ralgapa2</b>             | Ral GTPase activating protein, alpha subunit 2 (catalytic)                         | 0032484 // Ral protein signal transduction // inferred from mutant phenotype//0032880 // regulation of protein localization // inferred from mutant phenotype//0051056          |
| 104.67884      | 171.46066     | 0.0098942 | NM_001177503//NM_0061 | 1.68 | <b>Plekhd1</b>              | pleckstrin homolog domain containing, family D (with collel-coil domains) member 1 |                                                                                                                                                                                 |
| 134.11865      | 223.32632     | 0.0070842 | NM_126166//NM_006509  | 1.68 | <b>Trl3</b>                 | tol-like receptor 3                                                                | 0001774 // microglial cell activation // not recorded//0001819 // positive regulation of cytokine production // inferred from electronic annotation//0001934 // positive reg    |
| 18.742228      | 31.431572     | 0.0091756 | NM_145467//NM_006518  | 1.69 | <b>Itgbl1</b>               | integrin, beta-like 1                                                              | </                                                                                                                                                                              |

| [C3H/HeN][raw] | [Gsr-KO][raw] | p [Corr]  | RefSeq Transcript ID   | FD   | Gene Symbol                | Gene Title                                                                            | Gene Ontology Biological Process                                                                                                                                              |
|----------------|---------------|-----------|------------------------|------|----------------------------|---------------------------------------------------------------------------------------|-------------------------------------------------------------------------------------------------------------------------------------------------------------------------------|
| 226.32802      | 386.1712      | 0.0092225 | NM_027288//NM_0065006  | 1.70 | <b>Mamba</b>               | mannosidase, beta A, lysosomal                                                        | 0005975 // carbohydrate metabolic process // inferred from electronic annotation//0006516 // glycoprotein catabolic process // inferred from direct assay//0008152 // m       |
| 249.0405       | 427.8245      | 0.0051715 | NM_001271356//NM_001   | 1.70 | <b>Fln</b>                 | follistatin                                                                           | 0000122 // negative regulation of transcription from RNA polymerase II promoter // inferred from mutant phenotype//0000122 // negative regulation of transcription from       |
| 130.01054      | 218.65361     | 0.0068697 | NM_001122635//NM_177   | 1.70 | <b>Cdhr4</b>               | cadherin-related family member 4                                                      | 0007155 // cell adhesion // inferred from electronic annotation//0007156 // homophilic cell adhesion via plasma membrane adhesion molecules // inferred from electronic       |
| 25.975962      | 44.556644     | 0.0045517 | XR_390980//XR_390981// | 1.70 | <b>LOC102631977</b>        | uncharacterized LOC102631977                                                          |                                                                                                                                                                               |
| 111.1445       | 188.18314     | 0.0093097 | NM_023044              | 1.70 | <b>Slc15a3</b>             | solute carrier family 15, member 3                                                    | 0006810 // transport // inferred from electronic annotation//0006857 // oligopeptide transport // inferred from electronic annotation//0015031 // protein transport // inf    |
| 155.87709      | 267.8136      | 0.0096864 | NM_01033149//NM_006    | 1.71 | <b>Tct9</b>                | tetratricopeptide repeat domain 9                                                     | 0000413 // protein peptidyl-prolyl isomerization // not recorded//0006107 // chaperone-mediated protein folding // not recorded                                               |
| 172.39857      | 294.61115     | 0.0065276 | NM_009841              | 1.71 | <b>Cd14</b>                | CD14 antigen                                                                          | 0002237 // response to molecule of bacterial origin // inferred from direct assay//0002376 // immune system process // inferred from electronic annotation//0006898 // r      |
| 1419.1439      | 2382.3271     | 0.008644  | NM_0103671             | 1.71 | <b>Sod2</b>                | superoxide dismutase 2, mitochondrial                                                 | 0000302 // response to reactive oxygen species // inferred from mutant phenotype//0000303 // response to superoxide // inferred from mutant phenotype//0000303 // r           |
| 186.20483      | 317.71875     | 0.0095919 | XR_387233//XR_387234// | 1.72 | <b>Gm29538</b>             | predicted gene 29538                                                                  |                                                                                                                                                                               |
| 321.45078      | 560.8739      | 0.003657  | NM_001286062//NM_009   | 1.72 | <b>Angpt1</b>              | angiopoietin 1                                                                        | 0001525 // angiogenesis // inferred from direct assay//0001525 // angiogenesis // inferred from mutant phenotype//0001541 // ovarian follicle development // not rec          |
| 141.70741      | 241.15158     | 0.0079092 | NM_001005740//NM_001   | 1.72 | <b>Phcrt1//Cst11</b>       | phosphatase and actin regulator 1//carbohydrate sulfotransferase 11                   | 0031032 // actomyosin structure organization // inferred from mutant phenotype//0031032 // actomyosin structure organization // not recorded//0031532 // actin cytos          |
| 451.15045      | 787.47424     | 0.0065464 | NM_029508//NM_006527   | 1.72 | <b>Pcgf5</b>               | polycomb group ring finger 5                                                          | 0006351 // transcription, DNA-templated // inferred from electronic annotation//0006355 // regulation of transcription, DNA-templated // inferred from electronic annotat     |
| 88.48398       | 147.9736      | 0.0097449 | NM_011033156//NM_001   | 1.72 | <b>Steap2</b>              | six transmembrane epithelial antigen of prostate 2                                    | 0006810 // transport // inferred from electronic annotation//0006811 // ion transport // inferred from electronic annotation//0006893 // Golgi to plasma membrane tran        |
| 287.14225      | 502.43848     | 0.0052567 | NM_001167860//NM_001   | 1.72 | <b>Wipf3</b>               | WAS/WASL interacting protein family, member 3                                         | 0000147 // actin cortical patch assembly // --//0006897 // endocytosis // --//0007275 // multicellular organismal development // inferred from electronic annotation//D       |
| 482.09055      | 853.3207      | 0.0089693 | NM_001039181//NM_001   | 1.73 | <b>Npr3</b>                | natriuretic peptide receptor 3                                                        | 0001501 // skeletal system development // inferred from direct assay//0001501 // skeletal system development // inferred from mutant phenotype//0002158 // osteoclas          |
| 7493.454       | 12037.867     | 0.0071126 | NM_025378              | 1.73 | <b>Ifitm3</b>              | interferon induced transmembrane protein 3                                            | 0002376 // immune system process // inferred from electronic annotation//0006898 // receptor-mediated endocytosis // inferred from mutant phenotype//0008285 // ne            |
| 245.71704      | 428.8852      | 0.0079038 | NM_01024139//NM_006    | 1.73 | <b>Adamts15</b>            | a disintegrin-like and metalloproteinase (reprolysin type) with thrombospondin type 1 | 0006508 // proteolysis // inferred from electronic annotation                                                                                                                 |
| 181.65309      | 314.36923     | 0.008368  | NM_001146342//NM_001   | 1.73 | <b>Rnk</b>                 | renalin, FAD-dependent amine oxidase                                                  | 0002931 // response to ischemia // inferred from electronic annotation//0003073 // regulation of systemic arterial blood pressure // inferred from mutant phenotype//000      |
| 236.38373      | 412.7049      | 0.0057397 | NM_001033213//NM_006   | 1.73 | <b>Tct7b</b>               | tetratricopeptide repeat domain 7B                                                    |                                                                                                                                                                               |
| 305.4366       | 536.0349      | 0.0075335 | NM_023755//NM_006529   | 1.73 | <b>Tfcp2l1</b>             | transcription factor CP2-like 1                                                       | 0000122 // negative regulation of transcription from RNA polymerase II promoter // inferred from direct assay//0000902 // cell morphogenesis // inferred from mutant phe      |
| 131.37415      | 225.08957     | 0.0086932 | NM_001289588//NM_001   | 1.74 | <b>Radi1</b>               | Ras association and Dbl domains                                                       | 0007155 // cell adhesion // inferred from electronic annotation//0007165 // signal transduction // inferred from electronic annotation//0007275 // multicellular organism     |
| 95.03452       | 161.67819     | 0.0075048 | NM_177855//NM_006501   | 1.75 | <b>Med12l</b>              | mediator complex subunit 12-like                                                      | 0006351 // transcription, DNA-templated // inferred from electronic annotation//0006355 // regulation of transcription, DNA-templated // inferred from electronic annotat     |
| 58.401875      | 102.86504     | 0.0085573 | NM_026955//NM_011242   | 1.75 | <b>Vstm5</b>               | V-set and transmembrane domain containing 5                                           |                                                                                                                                                                               |
| 104.39475      | 177.79718     | 0.0097449 | NM_021439//NM_006513   | 1.75 | <b>Cst11//Phcrt1</b>       | carbohydrate sulfotransferase 11//phosphatase and actin regulator 1                   | 0002063 // chondrocyte development // inferred from mutant phenotype//0005975 // carbohydrate metabolic process // inferred from electronic annotation//0007585 //            |
| 578.948        | 1033.826      | 0.0051039 | NM_001134191//NM_001   | 1.76 | <b>Gm21949//Schip1</b>     | predicted gene, 21949//schwannomin interacting protein 1                              | 0001553 // uterine invagination // inferred from genetic interaction//0001822 // kidney development // inferred from mutant phenotype//0006807 // nitrogen compound metab     |
| 43.128742      | 75.84508      | 0.0065464 | NM_178908              | 1.76 | <b>Fam26e</b>              | family with sequence similarity 26, member E                                          | 0006810 // transport // inferred from electronic annotation//0006811 // ion transport // inferred from electronic annotation//0006812 // cation transport // --//003422X      |
| 73.797386      | 129.19374     | 0.0086932 | NM_181748              | 1.77 | <b>Ffar4</b>               | free fatty acid receptor 4                                                            | 0007165 // signal transduction // inferred from electronic annotation//0007186 // G-protein coupled receptor signaling pathway // inferred from direct assay//0007186 //      |
| 177.39967      | 309.7365      | 0.0096878 | NM_008987              | 1.77 | <b>Ptx3</b>                | pentraxin related gene                                                                | 0001878 // response to yeast // inferred from mutant phenotype//0008228 // opsonization // inferred from mutant phenotype//0044869 // negative regulation by host of          |
| 35.71676       | 64.05593      | 0.0089296 | NM_009375//NM_006520   | 1.77 | <b>Tg</b>                  | thyroglobulin                                                                         | 0006590 // thyroid hormone generation // not recorded//0009268 // response to pH // not recorded//0015705 // iodide transport // inferred from mutant phenotype//D            |
| 87.682724      | 152.86406     | 0.0075124 | NM_009759              | 1.77 | <b>Bmx</b>                 | BMX non-receptor tyrosine kinase                                                      | 0002250 // adaptive immune response // not recorded//0006468 // protein phosphorylation // inferred from electronic annotation//0006915 // apoptotic process // infer         |
| 841.7611       | 1492.6134     | 0.0098942 | NM_138751              | 1.77 | <b>Tmem47</b>              | transmembrane protein 47                                                              | 0098609 // cell-cell adhesion // not recorded                                                                                                                                 |
| 206.18208      | 365.76892     | 0.0067139 | NM_001029838//NM_148   | 1.78 | <b>Pknox2</b>              | Pbx/knotted 1 homeobox 2                                                              | 0006355 // regulation of transcription, DNA-templated // inferred from electronic annotation//0006357 // regulation of transcription from RNA polymerase II promoter // ir    |
| 260.15036      | 469.4192      | 0.0091756 | NR_028300              | 1.78 | <b>Dubr</b>                | Dppa2 upstream binding RNA                                                            |                                                                                                                                                                               |
| 405.07373      | 739.9634      | 0.0055381 | NM_001002031//NM_008   | 1.79 | <b>Hspa2</b>               | heat shock protein 2                                                                  | 0001934 // positive regulation of protein phosphorylation // inferred from mutant phenotype//0007140 // male meiosis // inferred from mutant phenotype//0007141 // r          |
| 168.69484      | 301.58395     | 0.0096782 | NM_01162957            | 1.79 | <b>Rsph4a</b>              | radial spoke head 4 homolog A (Chlamydomonas)                                         | 0003341 // cilium movement // not recorded//0035082 // axonemal assembly // not recorded                                                                                      |
| 84.0419        | 147.38301     | 0.0079637 | NM_021427              | 1.79 | <b>Fam181b</b>             | family with sequence similarity 181, member B                                         |                                                                                                                                                                               |
| 600.61676      | 1099.8865     | 0.0089693 | NM_011498              | 1.79 | <b>Bhhel40</b>             | basic helix-loop-helix family, member 40                                              | 0000122 // negative regulation of transcription from RNA polymerase II promoter // not recorded//0006351 // transcription, DNA-templated // inferred from electronic ann      |
| 240.95113      | 436.5521      | 0.0065811 | NM_025807//NM_006513   | 1.79 | <b>Slc16a9</b>             | solute carrier family 16 (monocarboxylic acid transporters), member 9                 | 0006810 // transport // inferred from electronic annotation//0015718 // monocarboxylic acid transport // --//0034220 // ion transmembrane transport // not recorded//         |
| 1329.6221      | 2393.8083     | 0.0096679 | NM_019738              | 1.80 | <b>Nupr1</b>               | nucleolar protein transcription regulatory 1                                          | 0005226 // acute inflammatory response // inferred from mutant phenotype//0006351 // transcription, DNA-templated // inferred from electronic annotation//0006355 //          |
| 32.173088      | 57.879307     | 0.0052021 | NM_001142959//NM_001   | 1.80 | <b>Bcl2l15</b>             | BCL2-like 15                                                                          | 0006810 // transport // inferred from electronic annotation//0006886 // intracellular protein transport // traceable author statement//0006886 // intracellular protein tra   |
| 140.03128      | 251.22546     | 0.0086319 | NM_145523              | 1.80 | <b>Gcc</b>                 | granulin C                                                                            | 0006508 // proteolysis // not recorded                                                                                                                                        |
| 81.45403       | 143.87514     | 0.0066908 | NM_175522//NM_006504   | 1.80 | <b>Elfn1</b>               | leucine rich repeat and fibronectin type III, extracellular 1                         | 0010923 // negative regulation of phosphatase activity // not recorded//005808 // synapse organization // inferred from mutant phenotype                                      |
| 78.42289       | 140.94006     | 0.0086426 | NM_026358//NR_028121   | 1.80 | <b>Mgap9</b>               | mitochondrial localized glutamic acid rich protein                                    | 0006626 // protein targeting to mitochondrion // inferred from direct assay//0008089 // anterograde axon cargo transport // inferred from mutant phenotype//0008090 //        |
| 705.3691       | 1285.108      | 0.0085573 | NM_177715              | 1.81 | <b>Kctd12</b>              | potassium channel tetramerization domain containing 12                                | 0008277 // regulation of G-protein coupled receptor protein signaling pathway // inferred from genetic interaction//0051260 // protein homooligomerization // inferred fro    |
| 3539.897       | 6248.1313     | 0.0088655 | NM_009160              | 1.82 | <b>Sftpd</b>               | surfactant associated protein D                                                       | 0002376 // immune system process // inferred from electronic annotation//0007585 // respiratory gaseous exchange // inferred from electronic annotation//0008228 // o         |
| 124.19299      | 226.99611     | 0.0085929 | NM_001254747//NM_008   | 1.82 | <b>Il15</b>                | interleukin 15                                                                        | 0001779 // natural killer cell differentiation // inferred from genetic interaction//0001866 // NK T cell proliferation // inferred from mutant phenotype//0006954 // inflamm |
| 463.41934      | 865.88745     | 0.0078742 | NM_001281819//NM_009   | 1.83 | <b>Ace</b>                 | angiotensin I converting enzyme (peptidyl-dipeptidase A) 1                            | 0001822 // kidney development // inferred from mutant phenotype//0001822 // kidney development // not recorded//0002446 // neutrophil mediated immunity // infer              |
| 114.420746     | 205.82428     | 0.0071764 | NM_001190490//NM_001   | 1.83 | <b>Dmpk</b>                | dyostrophin myotonic-protein kinase                                                   | 0000082 // G1/S transition of mitotic cell cycle // --//0002028 // regulation of sodium ion transport // inferred from mutant phenotype//0006468 // protein phosphorylat      |
| 1092.0975      | 1994.2253     | 0.004449  | NM_001134191//NM_001   | 1.83 | <b>Gm21949//Schip1</b>     | predicted gene, 21949//schwannomin interacting protein 1                              | 0001553 // uterine invagination // inferred from genetic interaction//0001822 // kidney development // inferred from mutant phenotype//0006807 // nitrogen compound metab     |
| 165.57332      | 303.71582     | 0.0058281 | NM_001037221//NM_001   | 1.84 | <b>Samd4</b>               | sterile alpha motif domain containing 4                                               | 0006355 // regulation of transcription, DNA-templated // inferred from electronic annotation//0006417 // regulation of translation // inferred from electronic annotation//   |
| 81.79255       | 146.99629     | 0.008644  | NM_008032//NM_006527   | 1.84 | <b>Afp2</b>                | A1/FMR2 family, member 2                                                              | 0006397 // mRNA processing // inferred from electronic annotation//0007611 // learning or memory // inferred from mutant phenotype//0008380 // RNA splicing // infer          |
| 27.299326      | 50.68959      | 0.0080529 | NM_001081642//NM_001   | 1.84 | <b>Xlr4a//Xlr4b//Xlr4c</b> | X-linked lymphocyte-regulated 4A//X-linked lymphocyte-regulated 4B//X-linked lyr      | 0007286 // spermatid development // not recorded//0051965 // positive regulation of synapse assembly // inferred from mutant phenotype//00061003 // positive regulati         |
| 157.13287      | 286.29163     | 0.0097449 | NM_181073//NM_006515   | 1.85 | <b>Plekhh1</b>             | pleckstrin homology domain containing, family H (with MyTH domain) member 1           |                                                                                                                                                                               |
| 84.94911       | 154.22983     | 0.0070842 | NM_144810//NM_006529   | 1.85 | <b>Klhdc8a</b>             | kelch domain containing 8A                                                            | 0042787 // protein ubiquitination involved in ubiquitin-dependent protein catabolic process // not recorded                                                                   |
| 58.70021       | 109.41725     | 0.0096679 | NM_003150              | 1.85 | <b>Dhx58</b>               | DEXH (Asp-Glu-X-His) box polypeptide 58                                               | 0002376 // immune system process // inferred from electronic annotation//0008152 // metabolic process // inferred from electronic annotation//0009615 // response to          |
| 65.54396       | 119.71974     | 0.0089693 | NM_001083906//NM_006   | 1.85 | <b>Nr3c2</b>               | nuclear receptor subfamily 3, group C, member 2                                       | 0006351 // transcription, DNA-templated // inferred from electronic annotation//0006355 // regulation of transcription, DNA-templated // inferred from electronic annot       |
| 832.7405       | 1534.192      | 0.0086932 | NM_010156//NM_177590   | 1.85 | <b>Samd9l</b>              | sterile alpha motif domain containing 9-like                                          | 0002244 // hematopoietic progenitor cell differentiation // inferred from mutant phenotype//0017145 // stem cell division // inferred from mutant phenotype//0034058 //       |
| 195.23616      | 363.6839      | 0.0016791 | NM_008846//NM_006526   | 1.85 | <b>Pip5k1b</b>             | phosphatidylinositol-4-phosphate 5-kinase, type 1 beta                                | 0016310 // phosphorylation // inferred from electronic annotation//0046488 // phosphatidylinositol metabolic process // inferred from direct assay//0046484 // phosphat       |
| 469.6203       | 884.9181      | 0.0091547 | NM_026163              | 1.85 | <b>Pkp2</b>                | p plakophilin 2                                                                       | 0002159 // desmosome assembly // not recorded//0007507 // heart development // inferred from mutant phenotype//0008285 // negative regulation of cell proliferation           |
| 905.9772       | 1689.2041     | 0.0088871 | NM_0194142//NM_198048  | 1.85 | <b>Prx</b>                 | perixin                                                                               | 0019226 // transmission of nerve impulse // inferred from mutant phenotype//0019233 // sensory perception of pain // inferred from mutant phenotype//0032287 // peri          |
| 45.013584      | 83.33225      | 0.0079038 | NM_001161837//NM_001   | 1.86 | <b>Ptprr</b>               | protein tyrosine phosphatase, receptor type, R                                        | 0001701 // in utero embryonic development // inferred from sequence or structural similarity//0001701 // in utero embryonic development // inferred from electronic ann       |
| 570.0356       | 1069.675      | 0.0080529 | NM_011909              | 1.86 | <b>Usp18</b>               | UBR3 regulatory peptidase 18                                                          | 0006508 // proteolysis // inferred from electronic annotation//0006511 // ubiquitin-dependent protein catabolic process // inferred from electronic annotation//0016579 //    |
| 247.34767      | 466.3572      | 0.0022089 | NM_029870//NM_006525   | 1.87 | <b>Crefb1</b>              | CREB3 regulatory factor                                                               | 0000122 // negative regulation of transcription from RNA polymerase II promoter // not recorded//0006351 // transcription, DNA-templated // inferred from electronic ann      |
| 493.22305      | 934.52826     | 0.0065464 | NM_008591//NM_006504   | 1.87 | <b>Mct</b>                 | met proto-oncogene                                                                    | 0000122 // negative regulation of transcription from RNA polymerase II promoter // not recorded//0000187 // activation of MAPK activity // inferred from physical interacti   |
| 1139.4884      | 2124.53       | 0.0066692 | NM_001040005//NM_006   | 1.87 | <b>Rnf213</b>              | ring finger protein 213                                                               | 0008152 // metabolic process // inferred from electronic annotation//0016567 // protein ubiquitination // not recorded//0051865 // protein autoubiquitination // not rec      |
| 1570.9651      | 2895.2432     | 0.0065464 | NM_175386              | 1.87 | <b>Lhfp</b>                | lipian HMGIC fusion partner                                                           |                                                                                                                                                                               |
| 155.73012      | 293.67978     | 0.0089296 | NM_010266//NM_006526   | 1.87 | <b>Gda</b>                 | guanine deaminase                                                                     | 0006147 // guanine catabolic process // inferred from electronic annotation//0031116 // positive regulation of microtubule polymerization // not recorded//0040698 // gu      |
| 78.21652       | 143.29047     | 0.0093601 | NM_021560              | 1.88 | <b>Bhhle22</b>             | basic helix-loop-helix family, member e22                                             | 0006351 // transcription, DNA-templated // inferred from electronic annotation//0006355 // regulation of transcription, DNA-templated // inferred from electronic annot       |
| 31.886229      | 60.065887     | 0.0097449 | NM_001035042//NM_001   | 1.88 | <b>Spef2</b>               | spERM tagellar 2                                                                      | 0002520 // immune system development // inferred from mutant phenotype//0007283 // spermatogenesis // inferred from mutant phenotype//0009566 // fertilization //             |
| 271.8951       | 514.67596     | 0.0086932 | NM_001025379//NM_006   | 1.88 | <b>Sema3g</b>              | sema domain, immunoglobulin domain (Ig), short basic domain, secreted, (semaphor      | 0001755 // neural crest cell migration // not recorded//0003035 // positive regulation of cell migration // not recorded//0048843 // negative regulation of axon extensi      |
| 58.09308       | 108.905464    | 0.003657  | NM_028048//NM_006534   | 1.88 | <b>Slc25a35</b>            | solute carrier family 25, member 35                                                   | 0006810 // transport // inferred from electronic annotation                                                                                                                   |
| 160.99495      | 299.06546     | 0.0063393 | NM_0118801//NM_173067  | 1.88 | <b>Syt7</b>                | synaptotagmin VII                                                                     | 0001778 // plasma membrane repair // inferred from direct assay//0006887 // exocytosis // inferred from electronic annotation//0006906 // vesicle fusion // --//001607        |
| 422.0928       | 808.178       | 0.0098942 | NM_001289462//NM_001   | 1.89 | <b>Mme</b>                 | mannose metallo endopeptidase                                                         | 0001822 // kidney development // inferred from sequence or structural similarity//0001822 // kidney development // inferred from electronic annotation//0006508 // pr         |
| 391.24072      | 751.61505     | 0.0051039 | NM_178772//NM_011249   | 1.89 | <b>Nche1</b>               | neutral cholesterol ester hydrolase 1                                                 | 0006470 // protein dephosphorylation // inferred from direct assay//0006629 // lipid metabolic process // inferred from electronic annotation//0006805 // xenobiotic met      |
| 440.41406      | 847.1742      | 0.0091756 | NM_207237//NM_006538   | 1.89 | <b>Man1c1</b>              | mannosidase, alpha, class 1C, member 1                                                | 0006013 // mannose metabolic process // not recorded//0006491 // N-glycan processing // not recorded//0008152 // metabolic process // inferred from electronic annot          |
| 1695.592       | 3142.9358     | 0.003657  | NM_026432              | 1.89 | <b>Saraf</b>               | store-operated calcium entry-associated regulatory factor                             | 0006810 // transport // inferred from electronic annotation//0006811 // ion transport // inferred from electronic annotation//0006816 // calcium ion transport // infer       |
| 129.56706      | 243.19618     | 0.0085589 | NM_001316678//NM_001   | 1.89 | <b>Ptprc</b>               | protein tyrosine phosphatase, receptor type, E                                        | 0006470 // protein dephosphorylation // inferred from electronic annotation//0007185 // transmembrane receptor protein tyrosine phosphatase signaling pathway // infer        |
| 1264.7797      | 2382.2705     | 0.0071527 | NM_001135149//NM_001   | 1.90 | <b>Slc39a8</b>             | solute carrier family 39 (metal ion transporter), member 8                            | 0006810 // transport // inferred from electronic annotation//0006811 // ion transport // inferred from electronic annotation//0006829 // zinc II ion transport // not rec     |
| 171.44202      | 323.4576      | 0.0091557 | NM_009744              | 1.90 | <b>Bcl6</b>                | B cell leukemia/lymphoma 6                                                            | 0000060 // protein import into nucleus, translocation                                                                                                                         |

| [C3H/HeN][raw] | [Gsr-KO][raw] | p [Corr]  | RefSeq Transcript ID        | FD   | Gene Symbol     | Gene Title                                                                             | Gene Ontology Biological Process                                                                                                                                                                        |
|----------------|---------------|-----------|-----------------------------|------|-----------------|----------------------------------------------------------------------------------------|---------------------------------------------------------------------------------------------------------------------------------------------------------------------------------------------------------|
| 183.5103       | 352.99823     | 0.0075048 | NM_001085501                | 1.93 | <b>Ppp1r3d</b>  | protein phosphatase 1, regulatory subunit 3D                                           | 0005975 // carbohydrate metabolic process // inferred from electronic annotation//0005977 // glycogen metabolic process // inferred from electronic annotation//0005977                                 |
| 957.9298       | 1837.1918     | 0.0053533 | NM_0052347                  | 1.93 | <b>Bmper</b>    | BMP-binding endothelial regulator                                                      | 0001657 // ureteric bud development // inferred from expression pattern//0002043 // blood vessel endothelial cell proliferation involved in sprouting angiogenesis // not rec                           |
| 316.13116      | 618.3344      | 0.0066381 | NM_001042605//NM_010_1.93   |      | <b>Cd74</b>     | CD74 antigen (invariant polypeptide of major histocompatibility complex, class II anti | 0000187 // activation of MAPK activity // not recorded//0001516 // prostaglandin biosynthesis process // not recorded//0001961 // positive regulation of cytokine-mediat                                |
| 199.3179       | 388.6029      | 0.0070571 | NM_001290814//NM_010_1.93   |      | <b>Aff3</b>     | A4/FMR2 family, member 3                                                               | 0006351 // transcription, DNA-templated // traceable author statement//0006355 // regulation of transcription, DNA-templated // inferred from electronic annotation//0006351                            |
| 7611.6143      | 13720.644     | 0.0029632 | NM_013590                   | 1.94 | <b>Lyz1</b>     | lysozyme 1                                                                             | 0008152 // metabolic process // inferred from electronic annotation//0019835 // cytolysis // inferred from electronic annotation//0042742 // defense response to bacteri                                |
| 143.35594      | 278.46924     | 0.0064052 | NM_144547//XXM_006520_1.95  |      | <b>Amlr2</b>    | anti-Mullerian hormone type 2 receptor                                                 | 0006468 // metallophosphorylation // inferred from electronic annotation//0007165 // signal transduction // not recorded//0007178 // transmembrane receptor protein: /                                  |
| 170.1078       | 334.28027     | 0.0063393 | NM_001253872//NM_001_1.96   |      | <b>Itgal</b>    | integrin alpha L                                                                       | 0002291 // T cell activation via T cell receptor contact with antigen bound to MHC molecule on antigen presenting cell // not recorded//0007155 // cell adhesion // inferred /                          |
| 218.2756       | 431.7685      | 0.0093601 | NM_001291071//NM_019_1.97   |      | <b>Pfkap</b>    | phosphofuroctokinase, platelet                                                         | 0006002 // fructose 6-phosphate metabolic process // not recorded//0006096 // glycolytic process // not recorded//0006096 // metabolic process // inferred from electro                                 |
| 183.34116      | 360.3573      | 0.0062819 | NM_025285                   | 1.97 | <b>Stmn2</b>    | stathmin-like 2                                                                        | 0007230 // microtubule depolymerization // not recorded//0007026 // negative regulation of microtubule depolymerization // not recorded//0010976 // positive regulati                                   |
| 570.3194       | 1147.4928     | 0.0068707 | NM_013743                   | 1.98 | <b>Pdk4</b>     | pyruvate dehydrogenase kinase, isoenzyme 4                                             | 0000219 // positive regulation of defense response to virus by host // not recorded//0005975 // carbohydrate metabolic process // inferred from electronic annotation//0002122 //                       |
| 123.05497      | 239.6657      | 0.0065811 | NM_001127330//NM_001_1.98   |      | <b>Pparg</b>    | peroxisome proliferator activated receptor gamma                                       | 0000122 // negative regulation of transcription from RNA polymerase II promoter // inferred from direct assay//0000122 // negative regulation of transcription from RNA p                               |
| 166.21759      | 324.85428     | 0.0065811 | NM_0010109//NM_0207654_1.98 |      | <b>EfnA5</b>    | ephrin A5                                                                              | 0000122 // negative regulation of transcription from RNA polymerase II promoter // inferred from electronic annotation//0007399 // nervous system development // inferred from electronic annotation//, |
| 835.683        | 1664.1372     | 0.009206  | NM_010821//NM_006526_1.99   |      | <b>Mpeg1</b>    | macrophage expressed gene 1                                                            | 0006725 // cellular aromatic compound metabolic process // not recorded//0018879 // biphenyl metabolic process // not recorded//0018917 // fluorene metabolic proces                                    |
| 862.0359       | 1742.0831     | 0.0054206 | NM_007823                   | 1.99 | <b>Cyp4b1</b>   | cytochrome P450, family 4, subfamily b, polypeptide 1                                  | 0006725 // cellular aromatic compound metabolic process // not recorded//0018879 // biphenyl metabolic process // not recorded//0018917 // fluorene metabolic proces                                    |
| 346.9916       | 702.69035     | 0.0051039 | NM_001081369//XXM_006_2.00  |      | <b>Cxcl15</b>   | colled-coil domain containing 153                                                      | 0006725 // cellular aromatic compound metabolic process // not recorded//0018879 // biphenyl metabolic process // not recorded//0018917 // fluorene metabolic proces                                    |
| 110.81851      | 217.79674     | 0.0071292 | NM_026346                   | 2.00 | <b>Fbxo32</b>   | F-box protein 32                                                                       | 0014878 // response to electrical stimulus involved in regulation of muscle adaptation // not recorded//0014889 // muscle atrophy // not recorded//0014894 // response t                                |
| 205.68527      | 413.8293      | 0.0059714 | NM_146017//NM_006514_2.00   |      | <b>Gabbr</b>    | gamma-aminobutyric acid (GABA) A receptor, pi                                          | 0006810 // transport // inferred from electronic annotation//0006811 // ion transport // inferred from electronic annotation//0006821 // chloride transport // inferred fro                             |
| 44.236576      | 87.78764      | 0.0066908 | NM_183187//NM_006518_2.00   |      | <b>Fam107a</b>  | family with sequence similarity 107, member A                                          | 0001558 // regulation of cell growth // not recorded                                                                                                                                                    |
| 513.9294       | 1058.8928     | 0.0087842 | NM_008481//NM_006512_2.02   |      | <b>Lama2</b>    | laminin, alpha 2                                                                       | 0007155 // cell adhesion // inferred from electronic annotation//0007411 // axon guidance // inferred from genetic interaction//0022011 // myelination in peripheral nerv                               |
| 262.12515      | 531.6998      | 0.0066908 | NM_183180//NM_006499_2.02   |      | <b>Tspan18</b>  | tetraspanin 18                                                                         | 0007166 // cell surface receptor signaling pathway // not recorded                                                                                                                                      |
| 1361.3677      | 2712.8774     | 0.0029159 | NM_001034851//NM_001_2.02   |      | <b>Fam134b</b>  | family with sequence similarity 134, member B                                          | 0006914 // autophagy // inferred from electronic annotation//0019233 // sensory perception of pain // not recorded//0043524 // negative regulation of neuronal apoptotic                                |
| 670.5195       | 1381.5487     | 0.0051039 | NM_001177980//NM_001_2.03   |      | <b>Pde4b</b>    | phosphodiesterase 4B, cAMP specific                                                    | 0001780 // neurotrophin homeostasis // inferred from mutant phenotype//0006198 // cAMP catabolic process // inferred from direct assay//0006198 // cAMP catabolic proc                                  |
| 282.0061       | 580.5407      | 0.0068997 | NM_139200//XXM_006498_2.03  |      | <b>Cytip</b>    | cytohesin 1 interacting protein                                                        | 0030155 // regulation of cell adhesion // not recorded                                                                                                                                                  |
| 564.5124       | 1168.4445     | 0.0089693 | NM_001020927//XXM_006_2.03  |      | <b>Penk</b>     | preproenkephalin                                                                       | 0001662 // behavioral fear response // inferred from mutant phenotype//0001964 // startle response // inferred from mutant phenotype//0002118 // aggressive behavior                                    |
| 269.2509       | 550.75854     | 0.0087842 | NR_02845                    | 2.04 | <b>Copg2os2</b> | coatamer protein complex, subunit gamma 2, opposite strand 2                           |                                                                                                                                                                                                         |
| 72.43213       | 143.86687     | 0.0080529 | NM_177388//NM_006513_2.04   |      | <b>Slc41a2</b>  | solute carrier family 41, member 2                                                     | 0006810 // transport // inferred from electronic annotation//0006811 // ion transport // inferred from electronic annotation//0006812 // cation transport // inferred from                              |
| 102.79859      | 206.82564     | 0.0098162 | NM_009676//XXM_006495_2.04  |      | <b>Aox1</b>     | aldehyde oxidase 1                                                                     | 0055114 // oxidation-reduction process // inferred from electronic annotation                                                                                                                           |
| 243.65027      | 502.38266     | 0.0080529 | NM_025658                   | 2.04 | <b>Ms4d4d</b>   | membrane-spanning 4-domains, subfamily A, member 4D                                    |                                                                                                                                                                                                         |
| 234.50768      | 483.66772     | 0.0097449 | NM_172771//XXM_006511_2.05  |      | <b>Dmx12</b>    | Dmx-like 2                                                                             |                                                                                                                                                                                                         |
| 126.23253      | 255.52855     | 0.0080091 | NM_001284189//NM_011_2.05   |      | <b>Home1</b>    | homeo homolog 1 (Drosophila)                                                           | 0003009 // skeletal muscle contraction // inferred from mutant phenotype//0007216 // G-protein coupled glutamate receptor signaling pathway // not recorded//0007216                                    |
| 197.83577      | 408.99017     | 0.0085589 | NM_133969                   | 2.05 | <b>Cyp4v3</b>   | cytochrome P450, family 4, subfamily v, polypeptide 3                                  | 0006629 // lipid metabolic process // inferred from electronic annotation//0010430 // fatty acid omega-oxidation // not recorded//0055114 // oxidation-reduction proces                                 |
| 8346.263       | 15851.749     | 0.0028223 | NM_011339                   | 2.06 | <b>Cxcl15</b>   | chemokine (C-X-C motif) ligand 15                                                      | 0002690 // positive regulation of leukocyte chemotaxis // not recorded//0006935 // chemotaxis // inferred from direct assay//0006954 // inflammatory response // infer                                  |
| 112.669655     | 227.2316      | 0.0039361 | NM_001033336//NM_001_2.06   |      | <b>Abcc4</b>    | ATP-binding cassette, sub-family C (CFTR/MRP), member 4                                | 0006810 // transport // inferred from electronic annotation//0006855 // drug transmembrane transport // traceable author statement//0008152 // metabolic process // infer                               |
| 553.1897       | 1158.5629     | 0.0074508 | NM_001038917//NM_001_2.06   |      | <b>Scn3b</b>    | sodium channel, voltage-gated, type III, beta                                          | 0006810 // transport // inferred from electronic annotation//0006811 // ion transport // inferred from electronic annotation//0006814 // sodium ion transport // not reco                               |
| 272.63644      | 568.39166     | 0.0085634 | NM_145158//XXM_006524_2.07  |      | <b>Emilin2</b>  | elastin microfibril interactor 2                                                       | 0007155 // cell adhesion // inferred from electronic annotation                                                                                                                                         |
| 6952.505       | 13050.141     | 0.0098162 | NM_017372                   | 2.07 | <b>Lyz2</b>     | lysozyme 2                                                                             | 0008152 // metabolic process // inferred from electronic annotation//0019835 // cytolysis // inferred from electronic annotation//0042742 // defense response to bacteri                                |
| 1783.7448      | 3611.0603     | 0.0075737 | NM_021475                   | 2.07 | <b>Adamde1</b>  | ADAM-like, decysin 1                                                                   | 0006508 // proteolysis // inferred from electronic annotation                                                                                                                                           |
| 215.27951      | 446.15735     | 0.0088655 | NM_011104//XXM_006523_2.07  |      | <b>Prkce</b>    | protein kinase C, epsilon                                                              | 0002281 // macrophage activation involved in immune response // inferred from mutant phenotype//0002376 // immune system process // inferred from electronic annot                                      |
| 540.2403       | 1132.3718     | 0.0096782 | NM_001130479//NM_016_2.08   |      | <b>Nucb2</b>    | nucleobindin 2                                                                         | 0006874 // cellular calcium ion homeostasis // traceable author statement//0009749 // response to glucose // inferred from electronic annotation//0030818 // negative re                                |
| 201.31445      | 418.7091      | 0.0057594 | NM_178890                   | 2.08 | <b>Abtb2</b>    | ankyrin repeat and BTB (POZ) domain containing 2                                       | 0009737 // cellular response to toxic substance // inferred from mutant phenotype                                                                                                                       |
| 120.35099      | 248.19347     | 0.0029632 | NM_011395                   | 2.08 | <b>Slc22a3</b>  | solute carrier family 22 (organic cation transporter), member 3                        | 0006810 // transport // inferred from electronic annotation//0006811 // ion transport // inferred from electronic annotation//0015695 // organic cation transport // infer                              |
| 141.80731      | 292.08832     | 0.0075124 | NM_175460//NM_006529_2.08   |      | <b>Nnma12</b>   | nicotianamide nucleotide adenyltransferase 2                                           | 0006767 // water-soluble vitamin metabolic process // not recorded//0009058 // biosynthesis process // inferred from electronic annotation//0009425 // NAD biosynthesi                                  |
| 141.44603      | 291.13028     | 0.0045517 | NM_172887//NM_18781_2.08    |      | <b>Fry</b>      | furry homolog (Drosophila)                                                             | 0000902 // cell morphogenesis // not recorded//0031175 // neuron projection development // not recorded//0043086 // negative regulation of catalytic activity // infer                                  |
| 47.727184      | 98.83141      | 0.0075335 | NM_001039094//NM_177_2.08   |      | <b>Negr1</b>    | neuronal growth regulator 1                                                            | 0007155 // cell adhesion // inferred from electronic annotation//0007626 // locomotory behavior // inferred from mutant phenotype//0007631 // feeding behavior // infer                                 |
| 403.36682      | 859.81635     | 0.0065754 | NM_001159485//NM_001_2.09   |      | <b>Mcf2l</b>    | mcf2 transforming sequence-like                                                        | 0007266 // Rho protein signal transduction // inferred from direct assay//0035023 // regulation of Rho protein signal transduction // inferred from electronic annotation//C                            |
| 25.09648       | 53.149937     | 0.0066381 | NM_145838//XXM_006497_2.09  |      | <b>St8sia6</b>  | ST8 alpha-N-acetyl-neuraminidase alpha-2,8-sialyltransferase 6                         | 0001574 // ganglioside biosynthesis process // inferred from direct assay//0006486 // protein glycosylation // inferred from electronic annotation//0006493 // protein O-li                             |
| 82.79159       | 171.69635     | 0.0068697 | NM_009808//NM_006509_2.11   |      | <b>Casp12</b>   | caspace 12                                                                             | 0006508 // proteolysis // not recorded//0006508 // proteolysis // inferred from reviewed computational analysis//0006915 // apoptotic process // inferred from direct ass                               |
| 104.49214      | 217.39034     | 0.0058241 | NM_001164441//NM_026_2.12   |      | <b>Ankrd33b</b> | ankyrin repeat domain 33B                                                              |                                                                                                                                                                                                         |
| 3200.7126      | 6525.588      | 0.0029632 | NM_019759                   | 2.12 | <b>Dpt</b>      | dermatopontin                                                                          | 0007155 // cell adhesion // inferred from electronic annotation//0008285 // negative regulation of cell proliferation // inferred from direct assay//0030199 // collagen fibri                          |
| 84.07279       | 173.98712     | 0.0089693 | NM_001159583//NM_027_2.12   |      | <b>Fam219a</b>  | family with sequence similarity 219, member A                                          |                                                                                                                                                                                                         |
| 1165.376       | 2492.3284     | 0.0085589 | NM_010171                   | 2.13 | <b>F3</b>       | coagulation factor III                                                                 | 0001938 // positive regulation of endothelial cell proliferation // not recorded//0002541 // activation of plasma proteins involved in acute inflammatory response // not rec                           |
| 140.26965      | 294.8461      | 0.0059002 | NM_177708//XXM_006533_2.13  |      | <b>Rtn4r1l</b>  | reticulon 4 receptor-like 1                                                            | 0031103 // axon regeneration // traceable author statement                                                                                                                                              |
| 39.341496      | 83.005196     | 0.0080529 | NM_006543141//NM_012_2.13   |      | <b>Gm626</b>    | predicted gene 626                                                                     |                                                                                                                                                                                                         |
| 311.07205      | 674.5031      | 0.0053533 | NM_008332//XXM_006526_2.14  |      | <b>Ifit2</b>    | interferon-induced protein with tetratricopeptide repeats 2                            | 0002376 // immune system process // inferred from electronic annotation//0006915 // apoptotic process // inferred from electronic annotation//0006915 // response to v                                  |
| 77.038185      | 162.28484     | 0.0054667 | NM_010474                   | 2.14 | <b>H3st1</b>    | heparan sulfate (glucosamine) 3-O-sulfotransferase 1                                   | 0008152 // metabolic process // inferred from electronic annotation                                                                                                                                     |
| 499.13605      | 1098.2954     | 0.0096782 | NM_008343//XXM_011243_2.16  |      | <b>lgfbp3</b>   | insulin-like growth factor binding protein 3                                           | 0001588 // regulation of cell growth // inferred from genetic interaction//0001649 // osteoblast differentiation // inferred from expression pattern//0001933 // negative re                            |
| 146.05898      | 313.95056     | 0.0045556 | NM_001001179                | 2.18 | <b>BC048546</b> | cDNA sequence BC048546                                                                 | 0010466 // negative regulation of peptidase activity // inferred from electronic annotation//0010951 // negative regulation of endopeptidase activity // inferred from electr                           |
| 65.58282       | 141.8646      | 0.003657  | NM_007413                   | 2.18 | <b>Adora2b</b>  | adenosine A2b receptor                                                                 | 0001973 // adenosine receptor signaling pathway // inferred from electronic annotation//0002882 // positive regulation of chronic inflammatory response to non-antigenic                                |
| 143.07633      | 313.9796      | 0.0085929 | NM_197986//XXM_006506_2.18  |      | <b>Tmem140</b>  | transmembrane protein 140                                                              |                                                                                                                                                                                                         |
| 105.139244     | 225.87843     | 0.0093601 | NM_001143776//NM_001_2.18   |      | <b>Fam13c</b>   | family with sequence similarity 13, member C                                           |                                                                                                                                                                                                         |
| 1925.8959      | 4058.4963     | 0.0098878 | NM_001267695//NM_021_2.19   |      | <b>Cts5</b>     | cathepsin S                                                                            | 0002250 // adaptive immune response // inferred from electronic annotation//0006508 // proteolysis // inferred from direct assay//0006508 // proteolysis // not recordec                                |
| 505.31128      | 1128.7517     | 0.0091692 | NM_001252578//NM_001_2.19   |      | <b>Sulf2</b>    | sulfatase 2                                                                            | 0001822 // kidney development // inferred from genetic interaction//0002063 // chondrocyte development // inferred from mutant phenotype//0003094 // glomerular fil                                     |
| 277.31012      | 612.9941      | 0.0065811 | NM_011107//NM_006530_2.19   |      | <b>Plg2g1b</b>  | phospholipase A2, group IB, pancreas                                                   | 0002227 // innate immune response in mucosa // not recorded//0006629 // lipid metabolic process // inferred from electronic annotation//0006633 // fatty acid biosynthe                                 |
| 71.52299       | 155.01794     | 0.0068697 | NM_001163161//NM_010_2.20   |      | <b>Clec4d</b>   | cell-type lectin domain family 4, member d                                             | 0002250 // adaptive immune response // inferred from mutant phenotype//0002292 // T cell differentiation involved in immune response // inferred from mutant phenoty                                    |
| 82.66568       | 181.7305      | 0.0086841 | NM_001164059//NM_011_2.20   |      | <b>Seif</b>     | selectin, lymphocyte                                                                   | 0007155 // cell adhesion // inferred from electronic annotation//0033198 // response to ATP // inferred from direct assay//0034201 // response to oleic acid // inferred fr                             |
| 2931.3572      | 6099.77       | 0.0075737 | NM_021472//NM_201239_2.20   |      | <b>Rnase4</b>   | ribonuclease, RNase A family 4                                                         | 0001525 // angiogenesis // inferred from electronic annotation//0001525 // angiogenesis // inferred from sequence or structural similarity//                                                            |
| 65.77799       | 143.27281     | 0.0065726 | NM_00104867//XXM_006_2.20   |      | <b>Pm20d2</b>   | peptidase M20 domain containing 2                                                      | 0008152 // metabolic process // inferred from electronic annotation                                                                                                                                     |
| 412.89944      | 925.6845      | 0.0080529 | NM_172471//NM_006497_2.21   |      | <b>Ith5</b>     | inter-alpha (globulin) inhibitor h5                                                    | 0010466 // negative regulation of peptidase activity // inferred from electronic annotation//0010951 // negative regulation of endopeptidase activity // inferred from electr                           |
| 922.0197       | 2029.1315     | 0.0063393 | NM_001290549//NM_001_2.21   |      | <b>Tsk</b>      | endothelial-specific receptor tyrosine kinase                                          | 0001525 // angiogenesis // inferred from mutant phenotype//0001525 // angiogenesis // traceable author statement//0001569 // patterning of blood vessels // infer                                       |
| 221.3412       | 490.21185     | 0.0068707 | NM_028135//XXM_011248_2.21  |      | <b>Tmem163</b>  | transmembrane protein 163                                                              |                                                                                                                                                                                                         |
| 156.42018      | 340.83166     | 0.0089693 | NM_178405                   | 2.22 | <b>Atp1a2</b>   | ATPase, Na(+)/K(+)-transporting, alpha 2 polypeptide                                   | 0001504 // neurotransmitter uptake // inferred from mutant phenotype//0002026 // regulation of the force of heart contraction // inferred from mutant phenotype//0002                                   |
| 108.42433      | 239.35023     | 0.0016929 | NM_001025074//NM_001_2.22   |      | <b>Ntrk2</b>    | neurotrophic tyrosine kinase, receptor, type 2                                         | 0001570 // vasculogenesis // inferred from mutant phenotype//0001764 // neuron migration // inferred from mutant phenotype//0006468 // protein phosphorylation // i                                     |
| 2165.2852      | 4642.895      | 0.0058241 | NM_010406                   | 2.23 | <b>Hc</b>       | hemolytic complement                                                                   | 0001701 // in utero embryonic development // inferred from genetic interaction//0002376 // immune system process // inferred from electronic annotation//0006954 // i                                   |
| 174.98154      | 389.37378     | 0.0036447 | NM_009062                   | 2.23 | <b>Rgs4</b>     | regulator of G-protein signaling 4                                                     | 0007186 // G-protein coupled receptor signaling pathway // traceable author statement//0009968 // negative regulation of signal transduction // inferred from electronic ar                             |
| 303.26843      | 685.24176     | 0.0066555 | NM_001285833//NM_001_2.23   |      | <b>Nox4</b>     | NADPH oxidase 4                                                                        | 0009092 // cell morphogenesis // inferred from mutant phenotype//0001666 // response to hypoxia // inferred from electronic annotation//0006801 // superoxide metab                                     |
| 274.38187      | 616.9132      | 0.0065644 | NM_0019588//XXM_006527_2.23 |      | <b>Plice1</b>   | phospholipase C, epsilon 1                                                             | 0000187 // activation of MAPK activity // not recorded//0006629 // lipid metabolic process // inferred from electronic annotation//0007165 // signal transduction // infer                              |
| 206.79994      | 465.12817     | 0.0056277 | NM_001005422                | 2.24 | <b>Stmn1</b>    | stathmin domain containing 1                                                           | 0007019 // microtubule depolymerization // not recorded//0031110 // regulation of microtubule polymerization or depolymerization // inferred from electronic annotati                                   |
| 3339.0195      | 7139.971      | 0.0056422 | NM_023134//XXM_011244_2.24  |      | <b>Sftoa1</b>   | surfactant associated protein A1                                                       | 0001666 // response to hypoxia // inferred from electronic annotation//0007623 // circadian rhythm // inferred from electronic annotation//0009725 // response to horm                                  |
| 261.6693       | 595.74915     | 0.008644  | NM_008013                   | 2.24 | <b>Fgl2</b>     | fibrinogen-like protein 2                                                              | 0019835 // cytolysis // inferred from electronic annotation                                                                                                                                             |
| 46.226135      | 105.49858     | 0.0087756 | NM_001190869//NM_001_2.24   |      | <b>Kcnc3</b>    | potassium voltage-gated channel, Isk-related subfamily, gene 3                         | 0006810 // transport // inferred from electronic annotation//0006811 // ion transport // inferred from electronic annotation//0006813 // potassium ion transport // infer                               |
|                |               |           |                             |      |                 |                                                                                        |                                                                                                                                                                                                         |



| [C3H/HeN][raw] | [Gsr-KO][raw] | p [Corr]  | RefSeq Transcript ID        | FD   | Gene Symbol                     | Gene Title                                                                           | Gene Ontology Biological Process                                                                                                                                                                   |
|----------------|---------------|-----------|-----------------------------|------|---------------------------------|--------------------------------------------------------------------------------------|----------------------------------------------------------------------------------------------------------------------------------------------------------------------------------------------------|
| 248.62372      | 565.4211      | 0.0097449 | NM_001080707//NM_001_2.27   | 2.28 | <b>Gpr155</b>                   | G protein-coupled receptor 155                                                       | 0035556 // intracellular signal transduction // inferred from electronic annotation//0050890 // cognition // not recorded//0055085 // transmembrane transport // inferred                          |
| 66.32563       | 147.98506     | 0.0075737 | NM_0195177//NM_006523C_1.28 | 2.27 | <b>Bace2</b>                    | beta-site APP-cleaving enzyme 2                                                      | 0006508 // proteolysis // inferred from electronic annotation//0006509 // membrane protein ectodomain proteolysis // not recorded//0030163 // protein catabolic process                            |
| 299.9457       | 689.37805     | 0.0063393 | NM_0110566//NM_006517L_1.28 | 2.28 | <b>Pde4d</b>                    | phosphodiesterase 4D, cAMP specific                                                  | 0002027 // regulation of heart rate // inferred from mutant phenotype//0006198 // cAMP catabolic process // inferred from direct assay//0006198 // cAMP catabolic process                          |
| 1120.0814      | 2564.8206     | 0.0070842 | NM_029928//NM_006513C_1.28  | 2.28 | <b>Ptpnb</b>                    | protein tyrosine phosphatase, receptor type, B                                       | 0001525 // angiogenesis // inferred from direct assay//0001525 // angiogenesis // inferred from mutant phenotype//0006470 // protein dephosphorylation // inferred from                            |
| 170.89438      | 391.39023     | 0.0093457 | NM_177629                   | 2.29 | <b>Fam216b</b>                  | family with sequence similarity 216, member B                                        |                                                                                                                                                                                                    |
| 89.581764      | 207.10336     | 0.0081374 | NM_010350//NM_006532C_1.28  | 2.29 | <b>Grin2c</b>                   | glutamate receptor, ionotropic, NMDA2C (epsilon 3)                                   | 0001964 // startle response // inferred from mutant phenotype//0006810 // transport // inferred from electronic annotation//0006811 // ion transport // inferred from electronic annotation        |
| 71.34034       | 159.94627     | 0.0079020 | NM_001024474//NM_006_2.31   | 2.31 | <b>Diras2</b>                   | DIRAS family, GTP-binding RAS-like 2                                                 | 0007165 // signal transduction // inferred from electronic annotation//0007264 // small GTPase mediated signal transduction // inferred from electronic annotation                                 |
| 277.63974      | 649.59906     | 0.0030958 | NM_008926//NM_006534C_1.28  | 2.31 | <b>Prkg2</b>                    | protein kinase, cGMP-dependent, type II                                              | 0006468 // protein phosphorylation // inferred from electronic annotation//0007623 // circadian rhythm // inferred from mutant phenotype//0016310 // phosphorylation                               |
| 100.182076     | 229.4005      | 0.003839  | NM_013875//NM_006512C_1.28  | 2.31 | <b>Pde7b</b>                    | phosphodiesterase 7B                                                                 | 0006198 // cAMP catabolic process // inferred from electronic annotation//0007165 // signal transduction // inferred from electronic annotation//0008152 // metabolic p                            |
| 220.03156      | 514.675       | 0.0065754 | NM_001010937//NM_001_2.32   | 2.32 | <b>Gjb6</b>                     | gap junction protein, beta 6                                                         | 0006915 // apoptotic process // inferred from electronic annotation//0007154 // cell communication // inferred from electronic annotation//0007568 // aging // inferred f                          |
| 75.645226      | 172.8547      | 0.0083164 | NM_001163645//NM_027_2.32   | 2.32 | <b>Osbp13</b>                   | oxysterol binding protein-like 3                                                     | 0006810 // transport // inferred from electronic annotation//0006869 // lipid transport // inferred from electronic annotation                                                                     |
| 130.28003      | 298.87988     | 0.0063393 | NM_198612//NM_006506C_1.28  | 2.32 | <b>Gxylt2</b>                   | glucosyl xylosyltransferase 2                                                        | 0016266 // O-glycan processing // not recorded                                                                                                                                                     |
| 118.558075     | 280.851       | 0.0068697 | NM_029796                   | 2.33 | <b>Lrg1</b>                     | leucine-rich alpha-2-glycoprotein 1                                                  | 0001938 // positive regulation of endothelial cell proliferation // inferred from mutant phenotype//0030511 // positive regulation of transforming growth factor beta recept                       |
| 84.71815       | 195.9373      | 0.0066692 | NM_007609//NM_006508L_1.28  | 2.34 | <b>Casp4</b>                    | caspace-4, apoptosis-related cysteine peptidase                                      | 0006508 // proteolysis // inferred from reviewed computational analysis//0006915 // apoptotic process // not recorded//0007015 // actin filament organization // traceab                           |
| 125.147896     | 289.6305      | 0.0068697 | NM_001039530//NM_006_2.34   | 2.34 | <b>Panp14</b>                   | pankayin domain 29                                                                   | 0006351 // transcription, DNA-templated // inferred from electronic annotation//0006355 // regulation of transcription, DNA-templated // inferred from electronic annotat                          |
| 78.07248       | 178.92007     | 0.0084158 | NM_001190371                | 2.34 | <b>Ankrd29</b>                  | ankyrin repeat domain 29                                                             |                                                                                                                                                                                                    |
| 270.6297       | 645.497       | 0.003657  | NM_011584                   | 2.35 | <b>Nr1d2</b>                    | nuclear receptor subfamily 1, group D, member 2                                      | 0006355 // transcription, DNA-templated // inferred from electronic annotation//0006355 // regulation of transcription, DNA-templated // inferred from direct assay//001                           |
| 46.896732      | 109.975426    | 0.0088565 | NM_182839//NM_006517L_1.28  | 2.36 | <b>Tppp</b>                     | tubulin polymerization promoting protein                                             | 0001578 // microtubule bundle formation // not recorded//0031334 // positive regulation of protein complex assembly // inferred from sequence or structural similarity//0                          |
| 1191.6819      | 2793.941      | 0.0057397 | NM_001081178//NM_006_2.37   | 2.37 | <b>Adgrf5</b>                   | adhesion G-protein-coupled receptor F5                                               | 0006112 // energy reserve metabolic process // inferred from mutant phenotype//0007166 // cell surface receptor signaling pathway // inferred from electronic annotation                           |
| 62.762768      | 147.30373     | 0.0040505 | NM_139134//NM_006523C_1.28  | 2.38 | <b>Chodl</b>                    | chondrolectin                                                                        | 0010975 // regulation of neuron projection development // inferred from genetic interaction                                                                                                        |
| 367.12323      | 891.27124     | 0.003657  | NM_001037713//NM_001_2.39   | 2.39 | <b>Xaf1</b>                     | XIAP associated factor 1                                                             | 0006915 // apoptotic process // inferred from electronic annotation//0031333 // negative regulation of protein complex assembly // not recorded//0035456 // response t                             |
| 12435.358      | 26707.742     | 0.002626  | NM_011681                   | 2.39 | <b>Scgb1a1</b>                  | secretoglobin, family 1A, member 1 (uteroglobin)                                     | 0000122 // negative regulation of transcription from RNA polymerase II promoter // inferred from direct assay//0000122 // negative regulation of transcription from RNA p                          |
| 52.192047      | 126.30348     | 0.0029632 | NM_001291903//NM_009_2.41   | 2.41 | <b>Adcy8</b>                    | adenylyl cyclase 8                                                                   | 0006171 // cAMP biosynthetic process // not recorded//007189 // adenylyl cyclase-activating G-protein coupled receptor signaling pathway // not recorded//0007193                                  |
| 146.92699      | 350.37753     | 0.0063393 | NM_001113198//NM_001_2.42   | 2.42 | <b>Mitf</b>                     | microphthalmia-associated transcription factor                                       | 0000122 // negative regulation of transcription from RNA polymerase II promoter // not recorded//0006351 // transcription, DNA-templated // inferred from electronic ann                           |
| 59.913155      | 143.71056     | 0.0030958 | NM_00121297                 | 2.42 | <b>Tlr4</b>                     | tolllike receptor 4                                                                  | 0000187 // activation of MAPK activity // inferred from mutant phenotype//0001774 // microglial cell activation // not recorded//0002218 // activation of innate immune                            |
| 816.94666      | 1980.6986     | 0.0066908 | NM_001164724//NM_133_2.43   | 2.43 | <b>Il33</b>                     | interleukin 33                                                                       | 0002686 // negative regulation of leukocyte migration // inferred from genetic interaction//0002826 // negative regulation of T-helper 1 type immune response // inferred f                        |
| 19.55856       | 47.740593     | 0.0079038 | NM_00121718                 | 2.44 | <b>Ms4d4b</b>                   | membrane-spanning 4-domains, subfamily A, member 4B                                  |                                                                                                                                                                                                    |
| 399.34976      | 976.8734      | 0.0079038 | NM_020509                   | 2.44 | <b>Retna</b>                    | resistin like alpha                                                                  |                                                                                                                                                                                                    |
| 447.8262       | 1111.3579     | 0.0063393 | NM_001145886//NM_001_2.45   | 2.45 | <b>Tiam1</b>                    | T cell lymphoma invasion and metastasis 1                                            | 0003300 // cardiac muscle hypertrophy // not recorded//0007160 // cell-matrix adhesion // not recorded//0007165 // signal transduction // inferred from electronic anno                            |
| 46.329746      | 114.348724    | 0.0029632 | NM_009381                   | 2.45 | <b>Thrsp</b>                    | thyroid hormone responsive                                                           | 0006351 // transcription, DNA-templated // inferred from electronic annotation//0006355 // regulation of transcription, DNA-templated // inferred from electronic annotat                          |
| 3121.7246      | 7459.5205     | 0.0028223 | NM_009127                   | 2.47 | <b>Scd1</b>                     | sterol Coenzyme A desaturase 1                                                       | 0006629 // lipid metabolic process // inferred from electronic annotation//0006631 // fatty acid metabolic process // inferred from electronic annotation//0006633 // fatt                         |
| 187.52766      | 466.9856      | 7.89E-04  | NM_172892                   | 2.48 | <b>Slc13a4</b>                  | solute carrier family 13 (sodium/sulfate symporters), member 4                       | 0006814 // sodium ion transport // inferred from electronic annotation//0008272 // sulfate transport // --//0035725 // sodium ion transmembrane transport // --//0055                              |
| 249.69566      | 623.3437      | 0.0054644 | NM_001098799//NM_006_2.48   | 2.48 | <b>Tox2</b>                     | TOX high mobility group box family member 2                                          | 0006338 // chromatin remodeling // not recorded//0006355 // regulation of transcription, DNA-templated // not recorded//0045944 // positive regulation of transcrip                                |
| 36.784607      | 90.86002      | 0.0055381 | NM_001012324                | 2.50 | <b>Ecm2</b>                     | extracellular matrix protein 2, female organ and adipocyte specific                  | 0007409 // xenogenesis // not recorded//0010811 // positive regulation of cell-substrate adhesion // inferred from direct assay//0030198 // extracellular matrix organiza                          |
| 63.79858       | 159.57997     | 0.007891  | NM_144559                   | 2.51 | <b>Fcgr4</b>                    | Fc receptor, IgG, low affinity IV                                                    | 0001866 // NK T cell proliferation // not recorded//0051930 // regulation of sensory perception of pain // not recorded//0071222 // cellular response to lipopolysaccharid                         |
| 15.575886      | 37.80726      | 0.0099337 |                             | 2.51 | <b>Igic2//Ilgc3//Iglv1</b>      | immunoglobulin lambda constant 2//immunoglobulin lambda constant 3//immun            | 0006898 // receptor-mediated endocytosis // not recorded//0006910 // phagocytosis, recognition // not recorded//0006911 // phagocytosis, engulfment // not recorded//                              |
| 579.46643      | 1448.4227     | 0.0065464 | NM_023386//NM_006522C_1.28  | 2.51 | <b>Rtp4</b>                     | receptor transporter protein 4                                                       | 0001580 // detection of chemical stimulus involved in sensory perception of bitter taste // not recorded//0006612 // protein targeting to membrane // not recorded//0051                           |
| 282.9635       | 726.5134      | 0.0029632 | NR_045305                   | 2.55 | <b>AU049972</b>                 | expressed sequence AU049972                                                          |                                                                                                                                                                                                    |
| 313.8854       | 804.7225      | 0.0068697 | NM_011446                   | 2.55 | <b>Sox7</b>                     | SRY (sex determining region Y)-box 7                                                 | 0007306 // endoderm formation // not recorded//0006351 // transcription, DNA-templated // inferred from electronic annotation//0006355 // regulation of transcription,                             |
| 264.44065      | 689.82953     | 0.0055381 | NM_007592                   | 2.57 | <b>Car8</b>                     | carbonic anhydrase 8                                                                 | 0006730 // one-carbon metabolic process // inferred from electronic annotation//0048015 // phosphatidylinositol-mediated signaling // inferred from direct assay                                   |
| 88.28486       | 226.24412     | 0.0070842 | NM_001020898//NM_001_2.58   | 2.58 | <b>LOC10038947//Sirp1a1</b>     | Sigal-regulatory protein beta 1-like//signal-regulatory protein beta 1A//signal-regu | 0035556 // intracellular signal transduction // inferred from direct assay//0005766 // positive regulation of phagocytosis // inferred from direct assay                                           |
| 78.65452       | 201.84773     | 0.0056277 | NM_001101605//NM_001_2.59   | 2.59 | <b>Ifi1b1</b>                   | interferon induced protein with tetratricopeptide repeats 1B like 1                  | 0051607 // defense response to virus // not recorded//0002337 // type I interferon signaling pathway // not recorded                                                                               |
| 155.10568      | 399.486       | 0.0048754 | NM_001308641//NM_001_2.59   | 2.59 | <b>Aqp4</b>                     | aquaporin 4                                                                          | 0006810 // transport // inferred from electronic annotation//0006833 // water transport // inferred from mutant phenotype//0006833 // water transport // not recorded/                             |
| 476.5647       | 1249.7941     | 0.0055381 | NM_007734                   | 2.60 | <b>Col4a3</b>                   | collagen, type IV, alpha 3                                                           | 0006919 // activation of cysteine-type endopeptidase activity involved in apoptotic process // not recorded//0007155 // cell adhesion // inferred from electronic annotation/                      |
| 43.79667       | 111.05094     | 0.0029632 | NM_001034874//NM_006_2.60   | 2.60 | <b>Shis6</b>                    | shisa family member 6                                                                | 0048172 // regulation of short-term neuronal synaptic plasticity // not recorded                                                                                                                   |
| 169.33844      | 446.06946     | 0.0043221 | NM_001164437//NM_006_2.60   | 2.60 | <b>Tmem212</b>                  | transmembrane protein 212                                                            |                                                                                                                                                                                                    |
| 53.896458      | 142.30481     | 0.001878  | NM_001081088                | 2.64 | <b>Lrp2</b>                     | low density lipoprotein receptor-related protein 2                                   | 0003281 // ventricular septum development // inferred from mutant phenotype//0006766 // vitamin metabolic process // inferred from mutant phenotype//0006897 // ei                                 |
| 115.617325     | 305.10468     | 0.002626  | NM_153576                   | 2.64 | <b>Cxcl17</b>                   | chemokine (C-X-C motif) ligand 17                                                    | 0001525 // negative regulation of septum development // inferred from electronic annotation//0006935 // chemotaxis // inferred from electronic annotation//0007275 // multicellular organismal dev |
| 133.59479      | 355.50977     | 0.0066381 | NM_0118874                  | 2.65 | <b>Pnliprp1</b>                 | pancreatic lipase related protein 1                                                  | 0006629 // lipid metabolic process // inferred from electronic annotation                                                                                                                          |
| 110.56271      | 295.46518     | 0.0038113 | NM_001033450//NM_001_2.65   | 2.65 | <b>Ifi204//Ifi205//Mnda//Mm</b> | interferon activated gene 204//interferon activated gene 205//myeloid cell nuclear   | 0000122 // negative regulation of transcription from RNA polymerase II promoter // --//0006351 // transcription, DNA-templated // inferred from electronic annotation//0                           |
| 73.1712        | 196.85178     | 0.0068697 | NM_010780                   | 2.67 | <b>Cma1</b>                     | chymase 1, mast cell                                                                 | 0006508 // proteolysis // not recorded//0006518 // peptide metabolic process // inferred from electronic annotation//0016485 // protein processing // not recorded//00                             |
| 1158.1539      | 3081.4294     | 0.0030958 | NM_0019634//NM_006527C_1.28 | 2.69 | <b>Tspan7</b>                   | tetraspanin 7                                                                        | 0007166 // cell surface receptor signaling pathway // not recorded                                                                                                                                 |
| 115.40602      | 416.12753     | 0.003657  | NM_00121320                 | 2.69 | <b>Ntn4</b>                     | netrin 4                                                                             | 0016322 // neuron remodeling // inferred from direct assay//0006668 // regulation of branching involved in salivary gland morphogenesis by extracellular matrix-epithelial                         |
| 219.98262      | 592.2917      | 0.0017344 | NM_0023850//NM_006500C_1.28 | 2.69 | <b>Chst1</b>                    | carbohydrate (keratan sulfate Gal-6) sulfotransferase 1                              | 0005975 // carbohydrate metabolic process // inferred from electronic annotation//0006012 // galactose metabolic process // not recorded//0006790 // sulfur compound                               |
| 271.42337      | 734.7937      | 0.0038505 | NM_001276719//NM_021_2.69   | 2.69 | <b>Acr2</b>                     | atypical chemokine receptor 2                                                        | 0006898 // receptor-mediated endocytosis // not recorded//0006935 // chemotaxis // inferred from electronic annotation//0006954 // inflammatory response // inferred                               |
| 83.36129       | 224.26677     | 0.003657  | NM_001313712//NM_001_2.72   | 2.72 | <b>Sp100</b>                    | nuclear antigen Sp100                                                                | 0000723 // telomere maintenance // inferred from sequence or structural similarity//0006338 // chromatin remodeling // not recorded//0006351 // transcription, DNA-tem                             |
| 59.955883      | 163.16252     | 0.0083164 | NM_001316716//NM_001_2.72   | 2.72 | <b>Ddo</b>                      | D-aspartate oxidase                                                                  | 0006531 // aspartate metabolic process // inferred from mutant phenotype//0006533 // aspartate catabolic process // not recorded//0007320 // insemination // inferred                              |
| 26.73941       | 73.40502      | 0.0071527 | NM_001081215//NM_001_2.72   | 2.72 | <b>Ddx60</b>                    | DEAD (Asp-Glu-Ala-Asp) box polypeptide 60                                            | 0008152 // metabolic process // inferred from electronic annotation//0009615 // response to virus // not recorded//0051607 // defense response to virus // inferred from                           |
| 273.74947      | 637.3048      | 0.0084664 | NM_016808//NM_198091_1.28   | 2.72 | <b>Usp2</b>                     | ubiquitin specific peptidase 2                                                       | 0000122 // negative regulation of transcription from RNA polymerase II promoter // not recorded//0006355 // regulation of transcription, DNA-templated // not recorded//                           |
| 87.42301       | 238.32614     | 0.0038113 | NM_001033450//NM_001_2.72   | 2.72 | <b>Ifi204//Ifi205//Mnda//Mm</b> | interferon activated gene 204//interferon activated gene 205//myeloid cell nuclear   | 0006351 // transcription, DNA-templated // inferred from electronic annotation//0006355 // regulation of transcription, DNA-templated // inferred from electronic annotat                          |
| 22.355173      | 62.1911       | 0.0058428 | NM_021451                   | 2.81 | <b>Pmaip1</b>                   | phorbol-12-myristate-13-acetate-induced protein 1                                    | 0001836 // release of cytochrome c from mitochondria // inferred from direct assay//0001836 // release of cytochrome c from mitochondria // inferred from mutant phen                              |
| 179.624        | 509.33017     | 0.003945  | NM_001122899//NM_010_2.82   | 2.82 | <b>Lepc</b>                     | leptin receptor                                                                      | 0001525 // angiogenesis // not recorded//0007165 // signal transduction // traceable author statement//0007186 // G-protein coupled receptor signaling pathway // not r                            |
| 127.14587      | 362.2733      | 0.0071527 | NM_007753//NM_006535C_1.28  | 2.86 | <b>Cpa3</b>                     | carboxypeptidase A3, mast cell                                                       | 0002002 // regulation of angiotensin levels in blood // inferred from genetic interaction//0002230 // positive regulation of defense response to virus by host // not r                            |
| 72.75436       | 207.88339     | 0.0070571 | NM_00103671//NM_001_2.89    | 2.89 | <b>Pcdha11//Pcdha10//Pcdha1</b> | protocadherin alpha 11//protocadherin alpha 10//protocadherin alpha 11//protoc       | 0007155 // cell adhesion // inferred from electronic annotation//0007155 // cell adhesion // traceable author statement//0007156 // homophilic cell adhesion via plasma r                          |
| 338.25473      | 1145.30774    | 0.002629  | NM_026433//NM_006534C_1.28  | 2.93 | <b>Tmem100</b>                  | transmembrane protein 100                                                            | 0001525 // angiogenesis // inferred from mutant phenotype//0001570 // vasculogenesis // inferred from mutant phenotype//0001701 // in utero embryonic development                                  |
| 294.21704      | 873.9351      | 0.0056464 | NM_181579//NM_006528C_1.28  | 2.95 | <b>Pof1b</b>                    | premature ovarian failure 1B                                                         |                                                                                                                                                                                                    |
| 47.54183       | 140.87915     | 0.0010672 | NM_010720//NM_006525C_1.28  | 2.95 | <b>Lipg</b>                     | lipase, endothelial                                                                  | 0006629 // lipid metabolic process // inferred from electronic annotation//0007584 // response to nutrient // inferred from electronic annotation//0008152 // metabolic p                          |
| 49.676265      | 204.17834     | 0.0070571 | NM_00103671//NM_001_2.97    | 2.97 | <b>Pcdha11//Pcdha10//Pcdha1</b> | protocadherin alpha 11//protocadherin alpha 10//protocadherin alpha 11//protoc       | 0007155 // cell adhesion // inferred from electronic annotation//0007155 // cell adhesion // traceable author statement//0007156 // homophilic cell adhesion via plasma r                          |
| 278.57547      | 843.65344     | 0.00442   | NM_001170851//NM_006_3.02   | 3.02 | <b>Mnda//Ifi204//Ifi205//Mm</b> | myeloid nuclear differentiation antigen like//interferon activated gene 204//interfe | 0000122 // negative regulation of transcription from RNA polymerase II promoter // --//0030308 // negative regulation of cell growth // inferred from mutant phenotype//                           |
| 343.45944      | 1063.4453     | 0.0017344 | NM_001290541//NM_001_3.07   | 3.07 | <b>Acer2</b>                    | alkaline ceramidase 2                                                                | 0001953 // negative regulation of cell-matrix adhesion // not recorded//0006629 // lipid metabolic process // inferred from electronic annotation//0006672 // ceramide m                           |
| 82.15428       | 253.48254     | 0.0059793 | NM_029499//NM_006527C_1.30  | 3.09 | <b>Ms4a4c</b>                   | membrane-spanning 4-domains, subfamily A, member 4C                                  |                                                                                                                                                                                                    |
| 21.08036       | 64.9102       | 0.0085634 | NM_001081642//NM_001_3.09   | 3.09 | <b>Xlr4a//Xlr4b//Xlr4c</b>      | X-linked lymphocyte-regulated 4A//X-linked lymphocyte-regulated 4B//X-linked lrr     | 0007286 // spermatid development // not recorded//0051965 // positive regulation of synapse assembly // inferred from mutant phenotype//0061003 // positive regulati                               |
| 293.97482      | 932.5208      | 0.008644  | NM_00892//NM_145126C_1.14   | 3.14 | <b>Chil3//Chil4</b>             | chitinase-like 3//chitinase-like 4                                                   | 0000272 // polysaccharide catabolic process // inferred from electronic annotation//0005975 // carbohydrate metabolic process // inferred from electronic annotation//0k                           |
| 24.66331       | 67.95044      | 0.0063393 | NM_001281830//NM_029_3.15   | 3.15 | <b>Ifi272a</b>                  | interferon, alpha-inducible protein 27 like 2A                                       | 0007568 // aging // inferred from direct assay//0009615 // response to virus // inferred from direct assay                                                                                         |
| 84.34006       | 264.42447     | 0.0068697 | NM_00103671//NM_001_3.15    | 3.15 | <b>Pcdha11//Pcdha10//Pcdha1</b> | protocadherin alpha 11//protocadherin alpha 10//protocadherin alpha 11//protoc       | 0007155 // cell adhesion // inferred from electronic annotation//0007155 // cell adhesion // traceable author statement//0007156 // homophilic cell adhesion via plasma r                          |
| 363.27496      | 1157.218      | 0.0017358 | NM_007607//NM_006532C_1.15  | 3.15 | <b>Car4</b>                     | carbonic anhydrase 4                                                                 | 0006730 // one-carbon metabolic process // inferred from electronic annotation//0006885 // regulation of pH // inferred by curator//0008152 // metabolic process                                   |

| [C3H/HeN][raw] | [Gsr-KO][raw] | p (Corr)  | RefSeq Transcript ID       | FD   | Gene Symbol    | Gene Title                                                                           | Gene Ontology Biological Process                                                                                                                                              |
|----------------|---------------|-----------|----------------------------|------|----------------|--------------------------------------------------------------------------------------|-------------------------------------------------------------------------------------------------------------------------------------------------------------------------------|
| 148.76588      | 525.8434      | 0.0017344 | NM_001045481//NM_001:3.51  | 3.51 | <b>Gm16340</b> | interferon-activable protein 203-like//interferon activated gene 203//interferon-act | 0000122 // negative regulation of transcription from RNA polymerase II promoter // ---//0030308 // negative regulation of cell growth // inferred from mutant phenotype//     |
| 148.76588      | 525.8434      | 0.0017344 | NM_001045481//NM_001:3.51  | 3.51 | <b>Gm16340</b> | interferon-activable protein 203-like//interferon activated gene 203//interferon-act | 0000122 // negative regulation of transcription from RNA polymerase II promoter // ---//0030308 // negative regulation of cell growth // inferred from mutant phenotype//     |
| 122.42584      | 440.06717     | 0.0093457 | NM_001302559//NM_011:3.54  | 3.54 | <b>Sjfn4</b>   | schlafen 4//schlafen 3                                                               | 0008285 // negative regulation of cell proliferation // inferred from direct assay                                                                                            |
| 77.33128       | 277.4902      | 0.0044089 | NM_009978//XM_0064988:3.59 | 3.59 | <b>Cst8</b>    | cystatin 8 (cystatin-related epididymal spermatogenic)                               | 0010466 // negative regulation of peptidase activity // inferred from electronic annotation//0010951 // negative regulation of endopeptidase activity // inferred from electr |
| 19.270977      | 69.53402      | 0.0090404 | NM_0080847//XM_006505:3.59 | 3.59 | <b>Asb15</b>   | ankyrin repeat and SOCS box-containing 15                                            | 0016567 // protein ubiquitination // inferred from electronic annotation//0035556 // intracellular signal transduction // inferred from electronic annotation                 |
| 250.2713       | 918.66266     | 5.12E-04  | NM_028765//XM_006500:3.63  | 3.63 | <b>Acox1</b>   | acyl-Coenzyme A oxidase-like                                                         | 0006631 // fatty acid metabolic process // inferred from electronic annotation//0006635 // fatty acid beta-oxidation // inferred from electronic annotation//0008152 // m     |
| 248.67621      | 911.01575     | 0.0026157 | NM_028770//XM_006521:3.65  | 3.65 | <b>Krt80</b>   | keratin 80                                                                           |                                                                                                                                                                               |
| 311.6158       | 1145.917      | 0.0034655 | NM_133871//XM_006502:3.66  | 3.66 | <b>Ifi44</b>   | interferon-induced protein 44                                                        |                                                                                                                                                                               |
| 117.619316     | 433.94168     | 0.0028847 | NM_007689                  | 3.70 | <b>Chad</b>    | chondroadherin                                                                       | 0001502 // cartilage condensation // inferred from electronic annotation//0060348 // bone development // inferred from mutant phenotype//1900155 // negative regulat          |
| 68.84327       | 254.50429     | 0.0089772 | XR_389090//XR_393604//     | 3.71 | <b>Gm11716</b> | predicted gene 11716                                                                 |                                                                                                                                                                               |
| 109.76887      | 399.0587      | 0.0096679 | NM_008744                  | 3.71 | <b>Ntn1</b>    | netrin 1                                                                             | 0001764 // neuron migration // inferred from mutant phenotype//0006915 // apoptotic process // inferred from electronic annotation//0006930 // substrate-dependent c          |
| 127.171875     | 498.67465     | 0.0022089 | NM_010501//XM_011247:3.88  | 3.88 | <b>Ifi13</b>   | interferon-induced protein with tetratricopeptide repeats 3                          | 0002376 // immune system process // inferred from electronic annotation//0008285 // negative regulation of cell proliferation // inferred from sequence or structural simil   |
| 240.64757      | 932.2404      | 0.0040953 | NM_011854//XM_006530:3.89  | 3.89 | <b>Oasl2</b>   | 2'-5' oligoadenylate synthetase-like 2                                               | 0002376 // immune system process // inferred from electronic annotation//0006164 // purine nucleotide biosynthetic process // inferred from direct assay//0006955 // in       |
| 21.40042       | 83.14979      | 0.0079632 | NM_198192                  | 3.95 | <b>Orfp1</b>   | pyroglutamylated RFamide peptide receptor                                            | 0007165 // signal transduction // inferred from electronic annotation//0007186 // G-protein coupled receptor signaling pathway // not recorded//0007218 // neuropeptid        |
| 81.53489       | 330.30823     | 0.0080529 | NM_027491                  | 4.11 | <b>Rragd</b>   | Ras-related GTP binding D                                                            | 0009267 // cellular response to starvation // not recorded//0010506 // regulation of autophagy // not recorded//0032008 // positive regulation of TOR signaling // not rec    |
| 24.4407        | 99.06813      | 0.0089693 | NM_001081180//XM_0064:4.18 | 4.18 | <b>Spink5</b>  | serine peptidase inhibitor, Kazal type 5                                             | 0002787 // negative regulation of antibacterial peptide production // inferred from mutant phenotype//0009913 // epidermal cell differentiation // not recorded//0010951      |
| 1292.4209      | 5602.4985     | 0.0029632 | NM_001099217//NM_001:4.35  | 4.35 | <b>Ly6c1</b>   | lymphocyte antigen 6 complex, locus C1//lymphocyte antigen 6 complex, locus C2       |                                                                                                                                                                               |
| 284.9526       | 1298.0779     | 0.0058237 | NM_001039160//NM_001:4.52  | 4.52 | <b>Gm4070</b>  | predicted gene 4070//GTPase, very large interferon inducible 1                       |                                                                                                                                                                               |
| 97.2642        | 456.6046      | 0.0059002 | NM_001204201//NM_001:4.62  | 4.62 | <b>Spp1</b>    | secreted phosphoprotein 1                                                            | 0001503 // ossification // inferred from electronic annotation//0001649 // osteoblast differentiation // not recorded//0006954 // inflammatory response // inferred from c    |
| 1081.0643      | 5144.0933     | 8.76E-04  | NM_009349                  | 4.83 | <b>Inmt</b>    | indolethylamine N-methyltransferase                                                  | 0009308 // amine metabolic process // not recorded//0009636 // response to toxic substance // inferred from electronic annotation//0032259 // methylation // not recon        |
| 105.83715      | 517.7283      | 0.0016929 | NM_001004173//XM_0064:4.91 | 4.91 | <b>Sgpp2</b>   | sphingosine-1-phosphate phosphatase 2                                                | 0006470 // protein dephosphorylation // ---//0006470 // protein dephosphorylation // inferred from electronic annotation//0006670 // sphingosine metabolic process // n       |
| 732.7444       | 3666.9175     | 0.0010806 | NM_007695//XM_006529:5.00  | 5.00 | <b>Chit1</b>   | chitinase-like 1                                                                     | 0005975 // carbohydrate metabolic process // inferred from electronic annotation//0006032 // chitin catabolic process // inferred from electronic annotation//0006915 //      |
| 75.53567       | 381.17316     | 0.0022352 | NM_022983                  | 5.03 | <b>Lpar3</b>   | lysophosphatidic acid receptor 3                                                     | 0000187 // activation of MAPK activity // inferred from direct assay//0007165 // signal transduction // inferred from electronic annotation//0007186 // G-protein coupled     |
| 335.8451       | 1698.0586     | 7.20E-05  | NM_001081346//NM_133:5.07  | 5.07 | <b>Rtkn2</b>   | receptor tyrosine kinase 2                                                           | 0008284 // positive regulation of cell proliferation // inferred from direct assay//0030097 // hemopoiesis // inferred from direct assay                                      |
| 39.824207      | 215.54616     | 0.0089693 | NM_024435//XM_006513:5.38  | 5.38 | <b>Nts</b>     | neurotensin                                                                          | 0001889 // liver development // inferred from electronic annotation//0001975 // response to amphetamine // inferred from electronic annotation//0006972 // hyperosm           |
| 1546.6343      | 8505.589      | 8.76E-04  | NM_001271416//NM_001:5.65  | 5.65 | <b>Ly6a</b>    | lymphocyte antigen 6 complex, locus A                                                |                                                                                                                                                                               |
| 285.31845      | 1651.0138     | 0.0053407 | NM_001289492//NM_001:5.86  | 5.86 | <b>Gbp3</b>    | guanylate binding protein 3                                                          | 0008152 // metabolic process // inferred from electronic annotation//0035458 // cellular response to interferon-beta // inferred from direct assay//0042832 // defense res    |
| 113.93021      | 760.41766     | 0.003657  | NM_008331                  | 6.73 | <b>Ifi11</b>   | interferon-induced protein with tetratricopeptide repeats 1                          | 0002376 // immune system process // inferred from electronic annotation//0009615 // response to virus // inferred from mutant phenotype//0035457 // cellular response         |
