# Supplementary material for: Glutathione reductase deficiency alters lung development and hyperoxic responses in neonatal mice
Source: PubMed Central journal article supplement — Redox Biol. 2020 Nov 13;38:101797. doi: 10.1016/j.redox.2020.101797 (PMC7708869; doi:10.1016/j.redox.2020.101797), 2020-11-13
Supplement: mmc2.pdf [file mmc2.pdf]

Table S2. Lung genes (n=448) significantly different between wild-type (Gsr-WT) and glutathione reductase-deficient (Gsr-KO) mouse neonates at PND5 (moderated t-test, p < 0.01).

Blue(-): fold lower in Gsr-KO. Red(+): fold higher in Gsr-KO.

| p (Corr) | [C3H/HeN, P5][raw] | [Gsr-KO, P5][raw] | RefSeq Transcript ID     | FD     | Gene Symbol                                     | Gene Title                                                                                          | Gene Ontology Biological Process                                                                                          |
|----------|--------------------|-------------------|--------------------------|--------|-------------------------------------------------|-----------------------------------------------------------------------------------------------------|---------------------------------------------------------------------------------------------------------------------------|
| 0.008322 | 816.4111           | 20.499601         | NM_001252569//NM_1-39.83 |        | <i>Serpina1a</i> // <i>Serpina1d</i>            | serine (or cysteine) peptidase inhibitor, clade A, member 1A//serine (or cysteine) peptidase inhibi | 0001701 // in utero embryonic development // inferred from mutant phenotype//0005487 // protein N-linked glycosyl         |
| 0.007904 | 1212.1318          | 31.046421         | NM_001111048//NM_1-39.04 |        | <i>Fga</i>                                      | fibrinogen alpha chain                                                                              | 0002250 // adaptive immune response // inferred from electronic annotation//0002376 // immune system process // i         |
| 0.007904 | 3976.5908          | 111.966354        | NM_007423                | -35.52 | <i>Afp</i>                                      | alpha fetoprotein                                                                                   | 0001542 // ovulation from ovarian follicle // inferred from mutant phenotype//0001889 // liver development // infer       |
| 0.007904 | 10688.147          | 387.60977         | NM_009654                | -27.57 | <i>Alb</i>                                      | albumin                                                                                             | 0001895 // retina homeostasis // inferred from electronic annotation//0006810 // transport // inferred from electronic    |
| 0.007904 | 2191.248           | 93.23511          | NM_013697                | -23.50 | <i>Ttr</i>                                      | transthyretin                                                                                       | 0006810 // transport // inferred from electronic annotation//0042572 // retinol metabolic process // not recorded//0      |
| 0.007904 | 1061.1097          | 49.17563          | NM_009245                | -21.58 | <i>Serpina1c</i>                                | serine (or cysteine) peptidase inhibitor, clade A, member 1C                                        | 0010466 // negative regulation of peptidase activity // inferred from electronic annotation//0010951 // negative regula   |
| 0.009035 | 769.831            | 35.87392          | NM_009244//XM_0061-21.46 |        | <i>Serpina1b</i> // <i>Serpina1e</i>            | serine (or cysteine) peptidase inhibitor, clade A, member 1B//serine (or cysteine) peptidase inhibi | 0001701 // in utero embryonic development // inferred from mutant phenotype//0006487 // protein N-linked glycosyl         |
| 0.007904 | 1290.831           | 66.092            | NM_001317105//NM_1-19.53 |        | <i>Fgg</i>                                      | fibrinogen gamma chain                                                                              | 0002250 // adaptive immune response // inferred from electronic annotation//0002376 // immune system process // i         |
| 0.007904 | 848.1587           | 45.2978           | NM_181849                | -18.72 | <i>Fgb</i>                                      | fibrinogen beta chain                                                                               | 0000050 // urea cycle // not recorded//0000050 // urea cycle // inferred by curator//0001889 // liver development //      |
| 0.007904 | 1642.4264          | 98.6514           | NM_009692                | -16.65 | <i>Apoa1</i>                                    | apolipoprotein A-I                                                                                  | 0001932 // regulation of protein phosphorylation // inferred from direct assay//0001935 // endothelial cell proliferati   |
| 0.007904 | 716.4201           | 51.838066         | NM_001080809//XM_1-13.82 |        | <i>Cps1</i>                                     | carbamoyl-phosphate synthetase 1                                                                    | 0000050 // urea cycle // not recorded//0000050 // urea cycle // inferred by curator//0001889 // liver development //      |
| 0.008322 | 375.42416          | 34.417618         | NM_008096                | -10.91 | <i>Gc</i>                                       | group specific component                                                                            | 0006810 // transport // inferred from electronic annotation//0007565 // female pregnancy // inferred from electronic      |
| 0.009035 | 359.7782           | 36.298824         | NM_001102411//NM_1-9.91  |        | <i>Kng1</i>                                     | kininogen 1                                                                                         | 0006954 // inflammatory response // inferred from electronic annotation//0007204 // positive regulation of cytosolic c    |
| 0.008322 | 377.97778          | 38.284813         | NM_007376                | -9.87  | <i>Pxp</i>                                      | pregnancy zone protein                                                                              | 0007566 // embryo implantation // inferred from genetic interaction//0010466 // negative regulation of peptidase acti     |
| 0.009035 | 803.4665           | 85.73314          | NM_001276449//NM_1-9.37  |        | <i>Ahs9</i>                                     | alpha 2-HS-glycoprotein                                                                             | 0001503 // ossification // inferred from direct assay//0006461 // protein complex assembly // not recorded//0006953       |
| 0.009035 | 589.5441           | 63.61869          | NM_016668                | -9.27  | <i>Bhmt</i>                                     | betaine-homocysteine methyltransferase                                                              | 0006479 // protein methylation // not recorded//0006577 // amino-acid betaine metabolic process // not recorded//K        |
| 0.007904 | 415.43906          | 45.725254         | NM_008407//XM_0061-9.09  |        | <i>Ith3</i>                                     | inter-alpha trypsin inhibitor, heavy chain 3                                                        | 0010466 // negative regulation of peptidase activity // inferred from electronic annotation//0010951 // negative regula   |
| 0.009539 | 376.79904          | 42.170784         | NM_008341                | -8.94  | <i>Igfbp1</i>                                   | insulin-like growth factor binding protein 1                                                        | 0001558 // regulation of cell growth // inferred from electronic annotation//0008286 // insulin receptor signaling pathw  |
| 0.008514 | 410.85446          | 46.395454         | NM_133997                | -8.86  | <i>ApoF</i>                                     | apolipoprotein F                                                                                    | 0006629 // lipid metabolic process // inferred from electronic annotation//0006641 // triglyceride metabolic process //   |
| 0.00824  | 321.74286          | 36.345715         | NM_008444//XM_0061-8.85  |        | <i>Serpinc1</i>                                 | serine (or cysteine) peptidase inhibitor, clade C (antithrombin), member 1                          | 0007584 // response to nutrient // not recorded//0007596 // blood coagulation // inferred from electronic annotation/     |
| 0.008579 | 677.73535          | 76.81403          | NM_008877                | -8.82  | <i>Plg</i>                                      | plasminogen                                                                                         | 0006508 // proteolysis // inferred from electronic annotation//0007596 // blood coagulation // not recorded//000759       |
| 0.007904 | 931.0161           | 106.86725         | NM_001305549//NM_1-8.71  |        | <i>Apoa2</i>                                    | apolipoprotein A-II                                                                                 | 0002526 // acute inflammatory response // inferred from electronic annotation//0002740 // negative regulation of cyt      |
| 0.007904 | 784.26904          | 90.57742          | NM_019395//XM_0111-8.66  |        | <i>Fbp1</i>                                     | fructose biphosphate 1                                                                              | 0005975 // carbohydrate metabolic process // not recorded//0006002 // fructose 6-phosphate metabolic process // no        |
| 0.008295 | 354.58105          | 41.410778         | NM_017399                | -8.56  | <i>Fabp1</i>                                    | fatty acid binding protein 1, liver                                                                 | 0002230 // positive regulation of defense response to virus by host // not recorded//0006810 // transport // inferred fr  |
| 0.009035 | 460.40594          | 54.565132         | NM_007443                | -8.44  | <i>Ambp</i>                                     | alpha 1 microglobulin/bikunin                                                                       | 0010466 // negative regulation of peptidase activity // inferred from electronic annotation//0010951 // negative regula   |
| 0.009035 | 364.10437          | 44.204582         | NM_175628//XM_0111-8.24  |        | <i>A2m</i>                                      | alpha 2-macroglobulin                                                                               | 0001869 // negative regulation of complement activation, lectin pathway // not recorded//0007565 // female pregnan        |
| 0.007904 | 117.096016         | 14.251434         | NM_029562//XM_0061-8.22  |        | <i>Cyp2d26</i>                                  | cytochrome P450, family 2, subfamily d, polypeptide 26                                              | 0006805 // xenobiotic metabolic process // not recorded//0007565 // female pregnancy // inferred from electronic anr      |
| 0.009035 | 569.55914          | 72.32811          | NM_013475//XM_0061-7.87  |        | <i>ApoH</i>                                     | apolipoprotein H                                                                                    | 0001937 // negative regulation of endothelial cell proliferation // not recorded//000641 // triglyceride metabolic proc   |
| 0.008933 | 297.7368           | 42.9369           | NM_001039555//XM_1-6.93  |        | <i>Cyp2c68</i>                                  | cytochrome P450, family 2, subfamily c, polypeptide 68                                              | 0006805 // xenobiotic metabolic process // not recorded//0019373 // epoxigenase P450 pathway // not recorded//0           |
| 0.009515 | 530.3659           | 79.21489          | NM_144903                | -6.70  | <i>Aldob</i>                                    | aldolase B, fructose-bisphosphate                                                                   | 0001889 // liver development // inferred from electronic annotation//0006000 // fructose metabolic process // not rec     |
| 0.009035 | 107.0329           | 16.240175         | NM_001150749//NM_1-6.59  |        | <i>Rdh7</i>                                     | retinol dehydrogenase 7                                                                             | 0008152 // metabolic process // inferred from electronic annotation//0042572 // retinol metabolic process // inferred 1   |
| 0.008933 | 101.333954         | 16.885468         | NM_031164//XM_0061-6.00  |        | <i>F13b</i>                                     | coagulation factor XIII, beta subunit                                                               | 0007596 // blood coagulation // inferred from electronic annotation//0007599 // hemostasis // inferred from electroni     |
| 0.00121  | 567.4212           | 95.492805         | NM_010344                | -5.94  | <i>Gsr</i>                                      | glutathione reductase                                                                               | 0006749 // glutathione metabolic process // inferred by curator//0006749 // glutathione metabolic process // not reco     |
| 0.009035 | 123.63873          | 21.02113          | NM_019775                | -5.88  | <i>Cpb2</i>                                     | carboxypeptidase B2 (plasma)                                                                        | 0003331 // positive regulation of extracellular matrix constituent secretion // not recorded//0006508 // proteolysis // r |
| 0.009515 | 115.26279          | 20.11462          | NM_008777                | -5.73  | <i>Pah</i>                                      | phenylalanine hydroxylase                                                                           | 0006559 // L-phenylalanine metabolic process // not recorded//0006559 // L-phenylalanine catabolic process // infer       |
| 0.007904 | 323.92343          | 60.301983         | NM_053149//XM_0111-5.37  |        | <i>Hemgn</i>                                    | hemogen                                                                                             | 0007275 // multicellular organismal development // inferred from electronic annotation//0030154 // cell differentiatio    |
| 0.009035 | 97.145935          | 21.40032          | NM_001277944//NM_1-4.54  |        | <i>ApoC2</i> // <i>ApoC4-apoc2</i>              | apolipoprotein C-II//ApoC4-ApoC2 readthrough                                                        | 0006629 // lipid metabolic process // inferred from electronic annotation//0006810 // transport // inferred from electr   |
| 0.009035 | 97.145935          | 21.40032          | NM_001277944//NM_1-4.54  |        | <i>ApoC2</i> // <i>ApoC4-apoc2</i>              | apolipoprotein C-II//ApoC4-ApoC2 readthrough                                                        | 0006629 // lipid metabolic process // inferred from electronic annotation//0006810 // transport // inferred from electr   |
| 0.009362 | 275.06216          | 60.65339          | NM_011318                | -4.53  | <i>Apc5</i>                                     | serum amyloid P-component                                                                           | 0006461 // protein complex assembly // not recorded//0044869 // negative regulation by host of viral exo-alpha-sialid     |
| 0.009035 | 205.81808          | 48.39711          | NM_009474                | -4.25  | <i>Uox</i>                                      | urate oxidase                                                                                       | 0006144 // purine nucleobase metabolic process // traceable author statement//0019628 // urate catabolic process //       |
| 0.009035 | 366.01755          | 88.19856          | NM_007686//XM_0061-4.15  |        | <i>Cfi</i>                                      | complement component factor i                                                                       | 0002376 // immune system process // inferred from electronic annotation//0006508 // proteolysis // inferred from ele      |
| 0.009035 | 369.15646          | 89.358025         | NM_017371                | -4.13  | <i>Hpx</i>                                      | hemopexin                                                                                           | 0002639 // positive regulation of immunoglobulin production // inferred from mutant phenotype//0002925 // positiv         |
| 0.009393 | 79.1952            | 19.251446         | NM_007768                | -4.11  | <i>Crp</i>                                      | C-reactive protein, pentraxin-related                                                               | 0006953 // acute-phase response // inferred from electronic annotation//0006958 // complement activation, classical /     |
| 0.009539 | 46.109886          | 11.378008         | NM_022884                | -4.05  | <i>Bhmt2</i>                                    | betaine-homocysteine methyltransferase 2                                                            | 0009086 // methionine biosynthetic process // not recorded//0032259 // methylation // inferred from electronic annot      |
| 0.009539 | 79.056564          | 20.695496         | NM_009258                | -3.82  | <i>Spink1</i>                                   | serine peptidase inhibitor, Kazal type 1                                                            | 0010466 // negative regulation of peptidase activity // inferred from direct assay//0010751 // negative regulation of nit |
| 0.009838 | 94.33337           | 24.844864         | NM_008277                | -3.80  | <i>Hpd</i>                                      | 4-hydroxyphenylpyruvic acid dioxygenase                                                             | 0006559 // L-phenylalanine catabolic process // inferred from electronic annotation//0006572 // tyrosine catabolic pro    |
| 0.009035 | 76.63665           | 20.551262         | NM_031197                | -3.73  | <i>Slc2a2</i>                                   | solute carrier family 2 (facilitated glucose transporter), member 2                                 | 0006810 // transport // inferred from electronic annotation//0008643 // carbohydrate transport // traceable author st     |
| 0.009539 | 266.90024          | 73.43783          | NM_009060//XM_0061-3.63  |        | <i>Rgn</i>                                      | regucalcin                                                                                          | 0001822 // kidney development // inferred from electronic annotation//0001889 // liver development // inferred from       |
| 0.009035 | 328.84247          | 91.71179          | NM_010582                | -3.59  | <i>Ith2</i>                                     | inter-alpha trypsin inhibitor, heavy chain 2                                                        | 0010466 // negative regulation of peptidase activity // inferred from electronic annotation//0010951 // negative regula   |
| 0.009035 | 103.575714         | 29.131329         | NM_013913                | -3.56  | <i>Angptl3</i>                                  | angiopoietin-like 3                                                                                 | 0006071 // glycerol metabolic process // not recorded//0006631 // fatty acid metabolic process // not recorded//0006      |
| 0.009838 | 59.324883          | 17.908747         | NM_008769//XM_0111-3.31  |        | <i>Otc</i>                                      | ornithine transcarbamylase                                                                          | 0000050 // urea cycle // not recorded//0001889 // liver development // inferred from electronic annotation//000652        |
| 0.007904 | 1182.6617          | 61.0509           | NM_009921                | -3.28  | <i>Camp</i>                                     | cathelicidin antimicrobial peptide                                                                  | 0001878 // immune system process // not recorded//0001934 // positive regulation of protein phosphorylation // not rec    |
| 0.008579 | 210.20525          | 66.2185           | NM_010391//XM_0111-3.17  |        | <i>H2-Q10</i>                                   | histocompatibility 2, Q region locus 10                                                             | 0002376 // immune system process // inferred from electronic annotation//0002474 // antigen processing and present        |
| 0.008322 | 680.87775          | 216.48624         | NM_008522                | -3.15  | <i>Ltf</i>                                      | lactotransferrin                                                                                    | 0001503 // ossification // inferred from electronic annotation//0001817 // regulation of cytokine production // not rec   |
| 0.009515 | 132.50206          | 43.66293          | NM_145499//XM_0111-3.03  |        | <i>Cyp2c70</i>                                  | cytochrome P450, family 2, subfamily c, polypeptide 70                                              | 0006805 // xenobiotic metabolic process // not recorded//0019373 // epoxigenase P450 pathway // not recorded//0           |
| 0.008322 | 46.314484          | 15.829743         | NM_153598                | -2.93  | <i>Ugt2b34</i>                                  | UDP glucuronosyltransferase 2 family, polypeptide B34                                               | 0008152 // metabolic process // inferred from electronic annotation//0009813 // flavonoid biosynthetic process // I       |
| 0.008322 | 35.96051           | 12.506638         | NM_009244//NM_0091-2.88  |        | <i>Serpina1b</i> // <i>Serpina1e</i>            | serine (or cysteine) peptidase inhibitor, clade A, member 1B//serine (or cysteine) peptidase inhibi | 0001701 // in utero embryonic development // inferred from mutant phenotype//0006487 // protein N-linked glycosyl         |
| 0.009515 | 1939.3445          | 687.6849          | NM_008694                | -2.82  | <i>Ngp</i>                                      | neutrophilic granule protein                                                                        | 0006952 // defense response // inferred from electronic annotation//0010466 // negative regulation of peptidase acti      |
| 0.009539 | 152.1246           | 58.687115         | NM_009693//XM_0061-2.59  |        | <i>ApoB</i>                                     | apolipoprotein B                                                                                    | 0001701 // in utero embryonic development // inferred from mutant phenotype//0006629 // lipid metabolic process //        |
| 0.008514 | 4169.445           | 1656.9628         | NM_001281852//NM_1-2.52  |        | <i>S100a9</i>                                   | S100 calcium binding protein A9 (calgranulin B)                                                     | 0002376 // immune system process // inferred from electronic annotation//0002523 // leukocyte migration involved in       |
| 0.00948  | 51.676186          | 70.72546          | NM_001174170//NM_1-2.49  |        | <i>Serpib2</i>                                  | serine (or cysteine) peptidase inhibitor, clade B, member 2                                         | 0010466 // negative regulation of peptidase activity // inferred from electronic annotation//0010951 // negative regula   |
| 0.009515 | 36.6129            | 15.245841         | NM_009060//XM_0061-2.40  |        | <i>A195470</i>                                  | expressed sequence A195470                                                                          |                                                                                                                           |
| 0.009035 | 2648.2278          | 1103.3864         | NM_025288//NM_0011-2.40  |        | <i>Stfa3</i> // <i>BC100530</i> // <i>Stfa1</i> | stefin A3//cDNA sequence BC100530//stefin A1                                                        | 0010466 // negative regulation of peptidase activity // inferred from electronic annotation//0010951 // negative regula   |
| 0.008322 | 3385.8508          | 1448.3231         | NM_001082543//NM_1-2.34  |        | <i>BC100530</i> // <i>Stfa1</i> // <i>Stfa3</i> | cDNA sequence BC100530//stefin A1//stefin A3                                                        | 0010466 // negative regulation of peptidase activity // inferred from electronic annotation//0010951 // negative regula   |
| 0.009515 | 463.5324           | 198.47755         | NM_001030294//XM_1-2.34  |        | <i>Olfm4</i>                                    | olfactomedin 4                                                                                      | 0007155 // cell adhesion // inferred from electronic annotation//0043124 // negative regulation of I-kappaB kinase/NF     |
| 0.009515 | 29.197231          | NM_009467         | NM_009467                | -2.33  | <i>Ugt2b5</i>                                   | UDP glucuronosyltransferase 2 family, polypeptide B5                                                | 0008152 // metabolic process // inferred from electronic annotation//0009813 // flavonoid biosynthetic process // not     |
| 0.009539 | 130.07101          | 56.527664         | NM_010824//XM_0061-2.30  |        | <i>Mpo</i>                                      | myeloperoxidase                                                                                     | 0001878 // response to yeast // inferred from mutant phenotype//0002149 // hypochlorous acid biosynthetic process ,       |
| 0.009539 | 68.18764           | 29.641487         | NM_020495//NM_178-2.27   |        | <i>9430047L24Rik</i>                            | RIKEN cDNA 9430047L24 gene                                                                          |                                                                                                                           |
| 0.009035 | 38.63272           | 17.025496         | NM_026414                | -2.25  | <i>Sco1b2</i>                                   | solute carrier organic anion transporter family, member 1b2                                         | 0001889 // liver development // inferred from electronic annotation//0006810 // transport // inferred from electronic     |
| 0.009035 | 213.84431          | 95.23019          | NM_001159299//NM_1-2.22  |        | <i>Asprv1</i>                                   | aspartic peptidase, retroviral-like 1                                                               | 0006508 // proteolysis // inferred from electronic annotation//0016485 // protein processing // inferred from direct as   |
| 0.009035 | 380.6708           | 171.54848         | NM_001159487//NM_1-2.22  |        | <i>Ith4</i>                                     | inter alpha-trypsin inhibitor, heavy chain 4                                                        | 0006953 // acute-phase response // inferred from electronic annotation//0010466 // negative regulation of peptidase ;     |
| 0.009539 | 821.34784          | 370.5598          | NM_001159487//NM_1-2.22  |        | <i>Rbp4</i>                                     | retinol binding protein 4, plasma                                                                   | 0001654 // eye development // inferred from mutant phenotype//0001654 // eye development // not recorded//000             |
| 0.009539 | 109.62054          | 49.707043         | NM_001042767//NM_1-2.21  |        | <i>Proc</i>                                     | protein C                                                                                           | 0006508 // proteolysis // inferred from electronic annotation//0007596 // blood coagulation // inferred from electronic   |
| 0.009035 | 85.57101           | 40.139442         | NM_030611//XM_0061-2.13  |        | <i>Akr1c6</i>                                   | aldo-keto reductase family 1, member C6                                                             | 0006629 // lipid metabolic process // inferred from electronic annotation//0006694 // steroid biosynthetic process // ir  |

| p (Corr) | [C3H/HeN, P5](raw) | [Gsr-KO, P5](raw) | RefSeq Transcript ID     | FD    | Gene Symbol                  | Gene Title                                                                                       | Gene Ontology Biological Process                                                                                            |
|----------|--------------------|-------------------|--------------------------|-------|------------------------------|--------------------------------------------------------------------------------------------------|-----------------------------------------------------------------------------------------------------------------------------|
| 0.009035 | 6512.8364          | 3080.731          | NM_0113650               | -2.11 | <b>S100a8</b>                | S100 calcium binding protein A8 (calgranulin A)                                                  | 0002376 // immune system process // inferred from electronic annotation//0002523 // leukocyte migration involved in         |
| 0.009539 | 91.161674          | 43.631207         | NM_01083904//NM_1-2.09   |       | <b>Fetub</b>                 | fetuin beta                                                                                      | 0007338 // single fertilization // inferred from mutant phenotype//0007339 // binding of sperm to zona pellucida // inf     |
| 0.007904 | 45.47442           | 22.273838         | NM_001291131//NM_1-2.04  |       | <b>Asgr1</b>                 | asialoglycoprotein receptor 1                                                                    | 0006897 // endocytosis // inferred from electronic annotation//0006898 // receptor-mediated endocytosis // not recor        |
| 0.00931  | 161.25824          | 79.039925         | NM_008572//XM_0065-2.04  |       | <b>Mcp18</b>                 | mast cell protease 8                                                                             | 0006508 // proteolysis // inferred from electronic annotation//0006955 // immune response // not recorded//001648           |
| 0.009539 | 72.10932           | 35.654472         | NM_027427//XM_0065-2.02  |       | <b>Taf15</b>                 | TAF15 RNA polymerase II, TATA box binding protein (TBP)-associated factor                        |                                                                                                                             |
| 0.009515 | 34.55852           | 17.145666         | NM_010001                | -2.02 | <b>Cyp2c37</b>               | cytochrome P450, family 2, subfamily c, polypeptide 37                                           | 0006805 // xenobiotic metabolic process // not recorded//0019373 // epoxygenase P450 pathway // not recorded//00            |
| 0.009035 | 142.16702          | 70.81732          | NM_133653//XM_0065-2.01  |       | <b>Matt1a</b>                | methionine adenosyltransferase 1, alpha                                                          | 0006556 // S-adenosylmethionine biosynthetic process // not recorded//0006730 // one-carbon metabolic process // w          |
| 0.009539 | 88.50968           | 44.16997          | NM_001302496//NM_1-2.00  |       | <b>Gjb1</b>                  | gap junction protein, beta 1                                                                     | 0007154 // cell communication // inferred from electronic annotation//0015868 // purine ribonucleotide transport // n       |
| 0.008514 | 114.84889          | 57.78398          | NM_001301404//NM_1-1.99  |       | <b>Serpina10</b>             | serine (or cysteine) peptidase inhibitor, clade A (alpha-1 antiprotease, antitrypsin), member 10 | 0007596 // blood coagulation // inferred from electronic annotation//0007599 // hemostasis // inferred from electroni       |
| 0.009035 | 170.41675          | 88.12699          | NM_011575                | -1.93 | <b>Tff3</b>                  | trefoil factor 3, intestinal                                                                     | 0010906 // regulation of glucose metabolic process // inferred from direct assay                                            |
| 0.007958 | 369.59058          | 191.68193         | NM_001159564//NM_1-1.93  |       | <b>Itgb6</b>                 | integrin beta 6                                                                                  | 0006954 // inflammatory response // inferred from mutant phenotype//0007155 // cell adhesion // inferred from elect         |
| 0.007904 | 115.297844         | 60.250324         | NM_020504                | -1.91 | <b>Cldn13</b>                | claudin 13                                                                                       |                                                                                                                             |
| 0.009035 | 74.39093           | 39.278843         | NM_019447//XM_0065-1.89  |       | <b>Hgfac</b>                 | hepatocyte growth factor activator                                                               |                                                                                                                             |
| 0.009035 | 203.5702           | 107.778244        | NM_001142706//NM_1-1.89  |       | <b>Cfb</b>                   | complement factor B                                                                              | 0006508 // proteolysis // inferred from electronic annotation                                                               |
| 0.007904 | 469.32083          | 251.78458         | NM_029784//XM_0065-1.86  |       | <b>Fam81a</b>                | family with sequence similarity 81, member A                                                     | 0002376 // immune system process // inferred from electronic annotation//0006508 // proteolysis // inferred from ele        |
| 0.009515 | 74.15848           | 39.8889           | NM_145146                | -1.86 | <b>Afm</b>                   | afamin                                                                                           |                                                                                                                             |
| 0.009035 | 82.129814          | 46.073097         | NM_001082960//NM_1-1.78  |       | <b>Itgam</b>                 | integrin alpha M                                                                                 | 0006810 // transport // inferred from electronic annotation//0051180 // vitamin transport // not recorded                   |
| 0.008322 | 287.88992          | 161.85806         | NM_008256                | -1.78 | <b>Hmgcs2</b>                | 3-hydroxy-3-methylglutaryl-Coenzyme A synthase 2                                                 | 0002523 // leukocyte migration involved in inflammatory response // inferred from mutant phenotype//0006412 // tra          |
| 0.009515 | 121.671135         | 69.7707           | NM_001122683//NM_1-1.74  |       | <b>Bdh1</b>                  | 3-hydroxybutyrate dehydrogenase, type 1                                                          | 0001822 // kidney development // inferred from electronic annotation//0001889 // liver development // inferred from         |
| 0.009035 | 109.09615          | 62.895817         | NM_032540//XM_0065-1.73  |       | <b>Kel</b>                   | Kell blood group                                                                                 | 0008152 // metabolic process // inferred from electronic annotation//0055114 // oxidation-reduction process // not re       |
| 0.004229 | 111.313835         | 64.34137          | NM_001168515//NM_1-1.73  |       | <b>Rgprip1</b>               | retinitis pigmentosa GTPase regulator interacting protein 1                                      | 0006508 // proteolysis // inferred from electronic annotation//0006874 // cellular calcium ion homeostasis // inferred f    |
| 0.009035 | 20.140684          | 11.720101         | NM_0015787               | -1.72 | <b>Hist1h1e</b>              | histone cluster 1, H1e                                                                           | 0007601 // visual perception // inferred from mutant phenotype//0042462 // eye photoreceptor cell development // ir         |
| 0.009838 | 85.03456           | 49.78549          | NM_001271777//NM_1-1.71  |       | <b>C8g</b>                   | complement component 8, gamma polypeptide                                                        | 0000122 // negative regulation of transcription from RNA polymerase II promoter // inferred from genetic interaction//      |
| 0.009539 | 265.6635           | 156.26965         | NM_001110827//NM_1-1.70  |       | <b>Rbfox2</b>                | RNA binding protein, fox-1 homolog (C. elegans) 2                                                | 0002376 // immune system process // inferred from electronic annotation//0006957 // complement activation, alterna          |
| 0.009838 | 71.19826           | 42.00909          | NM_001276710//NM_1-1.69  |       | <b>Aqxt</b>                  | alanine-glyoxylate aminotransferase                                                              | 0000381 // regulation of alternative mRNA splicing, via spliceosome // inferred from genetic interaction//0000381 // re     |
| 0.00948  | 32.087597          | 18.967062         | NM_001289755//NM_1-1.69  |       | <b>Apoc3</b>                 | apolipoprotein C-III                                                                             | 0007219 // Notch signaling pathway // inferred from direct assay//0008152 // metabolic process // inferred from elect       |
| 0.009757 | 82.98969           | 49.437355         | XR_380276//XR_39286-1.68 |       | <b>Gm33916</b>               | predicted gene, 33916                                                                            | 0006629 // lipid metabolic process // inferred from electronic annotation//0006641 // triglyceride metabolic process //     |
| 0.009515 | 521.6738           | 311.00317         | NM_016966//NR_0335-1.68  |       | <b>Gm8096//Phgdh//Gm6753</b> | 3-phosphoglycerate dehydrogenase pseudogene//3-phosphoglycerate dehydrogenase                    | 0006541 // glutamine metabolic process // inferred from mutant phenotype//0006544 // glycine metabolic process // i         |
| 0.007904 | 209.88908          | 125.27118         | NM_010635                | -1.68 | <b>Klf1</b>                  | Kruppel-like factor 1 (erythroid)                                                                | 0001701 // in utero embryonic development // inferred from mutant phenotype//0001889 // liver development // infe           |
| 0.008322 | 31.614925          | 19.28061          | NM_001290645//NM_1-1.64  |       | <b>C8a</b>                   | complement component 8, alpha polypeptide                                                        | 0002376 // immune system process // inferred from electronic annotation//0006955 // immune response // inferred fr          |
| 0.009161 | 68.87866           | 42.34007          | NM_009398                | -1.63 | <b>Tnfaip6</b>               | tumor necrosis factor alpha induced protein 6                                                    | 0007155 // cell adhesion // inferred from electronic annotation//0030335 // positive regulation of cell migration // not    |
| 0.008933 | 163.9482           | 101.6475          | NM_011270                | -1.61 | <b>Rhd</b>                   | Rh blood group, D antigen                                                                        | 0015696 // ammonium transport // inferred from mutant phenotype//0048821 // erythrocyte development // inferred             |
| 0.009035 | 146.27252          | 91.4925           | NM_009690                | -1.60 | <b>Cd5l</b>                  | CD5 antigen-like                                                                                 | 0006898 // receptor-mediated endocytosis // inferred from electronic annotation//0006915 // apoptotic process // inf        |
| 0.009539 | 318.34985          | 200.75731         | NM_008638//XM_0065-1.59  |       | <b>Mthfd2</b>                | methylene tetrahydrofolate dehydrogenase (NAD+ dependent), methenyltetrahydrofolate cyclohy      | 0006730 // one-carbon metabolic process // not recorded//0008152 // metabolic process // inferred from electronic ar        |
| 0.009035 | 182.09444          | 114.99019         | NM_177271                | -1.58 | <b>Samd5</b>                 | sterile alpha motif domain containing 5                                                          |                                                                                                                             |
| 0.008322 | 203.05083          | 128.72978         | NM_100000                | -1.58 | <b>Gm10401</b>               | predicted gene 10401                                                                             |                                                                                                                             |
| 0.00824  | 1346.5383          | 856.39703         | NM_133243//XR_0023-1.57  |       | <b>AY036118</b>              | cDNA sequence AY036118                                                                           |                                                                                                                             |
| 0.007904 | 432.43604          | 275.88815         | NM_027711//XM_0111-1.57  |       | <b>Igapp2</b>                | IQ motif containing GTPase activating protein 2                                                  | 0007165 // signal transduction // inferred from electronic annotation//0007264 // small GTPase mediated signal transd       |
| 0.009515 | 159.25708          | 102.108574        | NM_007976                | -1.56 | <b>F5</b>                    | coagulation factor V                                                                             | 0007596 // blood coagulation // inferred from direct assay//0007596 // blood coagulation // inferred from mutant phe        |
| 0.009539 | 49.777195          | 31.949018         | XM_011243805             | -1.56 | <b>Gm40824</b>               | predicted gene, 40824                                                                            |                                                                                                                             |
| 0.009539 | 404.84216          | 260.87363         | NM_028013                | -1.55 | <b>Endod1</b>                | endonuclease domain containing 1                                                                 |                                                                                                                             |
| 0.009539 | 107.88894          | 69.59727          | NM_198414                | -1.55 | <b>Paq9r</b>                 | progesterin and adipoQ receptor family member IX                                                 | 0008152 // metabolic process // inferred from electronic annotation//0090305 // nucleic acid phosphodiester bond hyc        |
| 0.009515 | 75.23336           | 48.9117           | NM_010024//XM_0065-1.54  |       | <b>Dct</b>                   | dopachrome tautomerase                                                                           |                                                                                                                             |
| 0.009657 | 71.39743           | 46.500046         | NM_023530//XM_0065-1.54  |       | <b>Pla2g12b</b>              | phospholipase A2, group XIIb                                                                     | 0002052 // positive regulation of neuroblast proliferation // inferred from mutant phenotype//0006583 // melanin bio        |
| 0.009539 | 327.16165          | 213.19955         | NR_015519                | -1.53 | <b>Al662270</b>              | expressed sequence Al662270                                                                      | 0016042 // lipid metabolic process // inferred from electronic annotation//0042632 // cholesterol homeostasis // infer      |
| 0.009515 | 380.11133          | 251.04103         | NM_010369//XM_0065-1.51  |       | <b>Gypa</b>                  | glycophorin A                                                                                    | 0007016 // cytoskeletal anchoring at plasma membrane // inferred from mutant phenotype//0047484 // regulation of            |
| 0.009539 | 231.7885           | 153.44604         | NM_015767//XM_0111-1.51  |       | <b>Tpa</b>                   | tocopherol (alpha) transfer protein                                                              | 0001890 // placenta development // inferred from mutant phenotype//0001892 // embryonic placenta development //             |
| 0.007904 | 149.97658          | 99.34097          | NM_001289507//NM_1-1.51  |       | <b>Tfr2</b>                  | transferrin receptor 2                                                                           | 0006879 // cellular iron ion homeostasis // traceable author statement//0006898 // receptor-mediated endocytosis //         |
| 0.009035 | 99.47614           | 66.52702          | NM_027903//XM_0065-1.50  |       | <b>Dhdh</b>                  | dihydrodiol dehydrogenase (dimeric)                                                              | 0042843 // D-xylose catabolic process // inferred from direct assay//0055114 // oxidation-reduction process // infer        |
| 0.009035 | 50.317238          | 33.86893          | NM_008952//XM_0111-1.49  |       | <b>Pipox</b>                 | pipeocic acid oxidase                                                                            | 0003514 // L-lysine catabolic process to acetyl-CoA via L-pipecolate // not recorded//0033514 // L-lysine catabolic proc    |
| 0.009141 | 174.4411           | 117.53102         | NM_007788//XM_0064-1.48  |       | <b>Csk2a1//Gm10031</b>       | casein kinase 2, alpha 1 polypeptide//predicted pseudogene 10031                                 | 0006351 // transcription, DNA-templated // inferred from electronic annotation//0006355 // regulation of transcription      |
| 0.009161 | 60.244728          | 40.656837         | NM_145539                | -1.48 | <b>Tm45f4</b>                | transmembrane 4 superfamily member 4                                                             | 0042246 // tissue regeneration // inferred from electronic annotation                                                       |
| 0.009035 | 146.79344          | 99.46615          | NM_007994                | -1.48 | <b>Fbp2</b>                  | fructose biphosphatase 2                                                                         | 0005975 // carbohydrate metabolic process // inferred from electronic annotation//0006094 // gluconeogenesis // not         |
| 0.009515 | 307.14972          | 209.08922         | NM_027457                | -1.47 | <b>Tmem242</b>               | transmembrane protein 242                                                                        |                                                                                                                             |
| 0.009035 | 50.580288          | 34.443153         | NM_008061                | -1.47 | <b>G6pc</b>                  | glucose-6-phosphatase, catalytic                                                                 | 0005977 // glycogen metabolic process // inferred from mutant phenotype//0005980 // glycogen catabolic process // i         |
| 0.009515 | 192.03654          | 130.93428         | NM_001161667//NM_1-1.47  |       | <b>Acox2</b>                 | acyl-Coenzyme A oxidase 2, branched chain                                                        | 0006629 // lipid metabolic process // inferred from electronic annotation//0006631 // fatty acid metabolic process // i     |
| 0.009838 | 294.8808           | 201.16042         | NM_007633                | -1.47 | <b>Ccne1</b>                 | cyclin E1                                                                                        | 0000082 // G1/S transition of mitotic cell cycle // inferred from electronic annotation//0001547 // antral ovarian follicle |
| 0.007904 | 136.62427          | 93.20229          | NM_025310                | -1.47 | <b>Ftsj3</b>                 | Ftsj3 homolog 3 (E. coli)                                                                        | 0000453 // enzyme-directed rRNA 2'-O-methylation // inferred from electronic annotation//0000463 // maturation of t         |
| 0.009035 | 47.06415           | 32.44323          | NR_040338                | -1.45 | <b>Redrum</b>                | Redrum, erythroid developmental long intergenic non-protein coding transcript                    |                                                                                                                             |
| 0.008933 | 872.99396          | 606.62067         | NM_001110251//NM_1-1.44  |       | <b>Hmbs</b>                  | hydroxymethylbilan synthase                                                                      | 0001666 // response to hypoxia // inferred from electronic annotation//0006779 // porphyrin-containing compound bi          |
| 0.009539 | 5428.973           | 3773.0276         | NM_001048061//NM_1-1.44  |       | <b>Hnrmpab</b>               | heterogeneous nuclear ribonucleoprotein A/B                                                      | 0000122 // negative regulation of transcription from RNA polymerase II promoter // inferred from genetic interaction//      |
| 0.009035 | 78.971115          | 54.98317          | NM_026085//NM_026-1.44   |       | <b>Pblid1//Pblid2</b>        | phenazine biosynthesis-like protein domain containing 1//phenazine biosynthesis-like protein do  | 0009058 // biosynthetic process // inferred from electronic annotation//0010633 // negative regulation of epithelial cel    |
| 0.009035 | 109.25326          | 76.39132          | NM_178931//XM_0065-1.43  |       | <b>Tnfrsf14</b>              | tumor necrosis factor receptor superfamily, member 14 (herpesvirus entry mediator)               | 0002741 // positive regulation of cytokine secretion involved in immune response // inferred from mutant phenotype//        |
| 0.009539 | 62.149387          | 44.175636         | NM_001136237//NM_1-1.41  |       | <b>Slc39a5</b>               | solute carrier family 39 (metal ion transporter), member 5                                       | 0001654 // eye development // not recorded//0006810 // transport // inferred from electronic annotation//0006811,           |
| 0.009035 | 279.50458          | 198.9557          | NM_008698//XM_0065-1.40  |       | <b>Nipsanp1</b>              | 4-nitrophenylphosphatase domain and non-neuronal SNAP25-like protein homolog 1 (C. elegans)      | 0019233 // sensory perception of pain // inferred from mutant phenotype                                                     |
| 0.009035 | 1414.5854          | 1008.10645        | NM_00131723//NM_1-1.40   |       | <b>Tuba4a</b>                | tubulin, alpha 4A                                                                                | 0007017 // microtubule-based process // inferred from electronic annotation//0008152 // metabolic process // inferre        |
| 0.009838 | 555.4557           | 398.02176         | NM_001024945//NM_1-1.40  |       | <b>Qsox1</b>                 | quiescin Q6 sulfhydryl oxidase 1                                                                 | 0006457 // protein folding // not recorded//0016242 // negative regulation of macroautophagy // not recorded//0045          |
| 0.008953 | 2961.0923          | 2127.6135         | NM_011239                | -1.39 | <b>Ranbp1</b>                | RAN binding protein 1                                                                            | 0007051 // spindle organization // inferred from direct assay//0010976 // positive regulation of neuron projection deve     |
| 0.009539 | 48.109287          | 34.59443          | XR_880475//XR_88855-1.39 |       | <b>Gm42127</b>               | predicted gene, 42127                                                                            |                                                                                                                             |
| 0.009539 | 638.3205           | 459.50595         | NM_010104                | -1.39 | <b>Edn1</b>                  | endothelin 1                                                                                     | 0000122 // negative regulation of transcription from RNA polymerase II promoter // not recorded//0001501 // skeletal        |
| 0.009515 | 26.50757           | 19.083727         | NM_172881                | -1.39 | <b>Ugt2b35</b>               | UDP glucuronosyltransferase 2 family, polypeptide B35                                            | 0008152 // metabolic process // inferred from electronic annotation//0009813 // flavonoid biosynthetic process // not       |
| 0.009647 | 20.862589          | 15.07787          | NM_001195596             | -1.38 | <b>Smlr1</b>                 | small leucine-rich protein 1                                                                     |                                                                                                                             |
| 0.009838 | 575.3545           | 415.9078          | NM_027421//XM_0065-1.38  |       | <b>Ints2</b>                 | integrator complex subunit 2                                                                     |                                                                                                                             |
| 0.009539 | 81.67399           | 59.150433         | NM_013754                | -1.38 | <b>Insl6</b>                 | insulin-like 6                                                                                   | 0016180 // snRNA processing // not recorded                                                                                 |
| 0.009539 | 178.88324          | 130.4749          | NM_010792//XM_0065-1.37  |       | <b>Mettl1</b>                | methyltransferase like 1                                                                         | 0007283 // spermatogenesis // inferred from mutant phenotype//0007286 // spermatid development // inferred from             |
| 0.009035 | 1982.2194          | 1451.1311         | NM_177730                | -1.37 | <b>Impad1</b>                | inositol monophosphatase domain containing 1                                                     | 0006400 // tRNA modification // not recorded//0008033 // tRNA processing // inferred from electronic annotation//00         |
|          |                    |                   |                          |       |                              |                                                                                                  | 0001501 // skeletal system development // inferred from mutant phenotype//0001958 // endochondral ossification //           |

| p (Corr) | [C3H/HeN, P5][raw] | [Gsr-KO, P5][raw] | RefSeq       | Transcript ID  | FD | Gene Symbol               | Gene Title                                                                    | Gene Ontology Biological Process                                                                                          |
|----------|--------------------|-------------------|--------------|----------------|----|---------------------------|-------------------------------------------------------------------------------|---------------------------------------------------------------------------------------------------------------------------|
| 0.009035 | 96.40056           | 70.88627          | NM_001161515 | //NM_1-1.36    |    | <b>Dctd</b>               | dCMP deaminase                                                                | 0006220 // pyrimidine nucleotide metabolic process // inferred from electronic annotation//0008152 // metabolic proc      |
| 0.009393 | 145.70305          | 107.20567         | NM_020591    | //NR_0278-1.36 |    | <b>Chd3os</b>             | chromodomain helicase DNA binding protein 3, opposite strand                  |                                                                                                                           |
| 0.009539 | 248.24391          | 183.27887         | NM_028228    | //XM_0061-1.35 |    | <b>Pinx1</b>              | PIN2/TERF1 interacting, telomerase inhibitor 1                                | 0007004 // telomere maintenance via telomerase // inferred from direct assay//0007080 // mitotic metaphase plate co       |
| 0.009317 | 1118.0834          | 826.66895         | NM_146229    | -1.35          |    | <b>Dync1li1</b>           | dynein cytoplasmic 1 light intermediate chain 1                               | 0006810 // transport // inferred from electronic annotation//0007018 // microtubule-based movement // inferred from       |
| 0.007904 | 422.27673          | 312.24203         | NM_007682    | -1.35          |    | <b>Cenpb</b>              | centromere protein B                                                          | 0006355 // regulation of transcription, DNA-templated // inferred from electronic annotation                              |
| 0.009539 | 828.747            | 613.9402          | NM_024193    | //XM_0061-1.35 |    | <b>Nops6</b>              | NOPS6 ribonucleoprotein                                                       | 000154 // rRNA modification // not recorded//0042254 // ribosome biogenesis // inferred from electronic annotation        |
| 0.009539 | 194.61078          | 144.30522         |              | -1.35          |    | <b>Tes3-ps</b>            | testis derived transcript 3, pseudogene                                       |                                                                                                                           |
| 0.009515 | 115.65555          | 85.826584         | NM_054094    | //XM_0061-1.35 |    | <b>Acsm1</b>              | acyl-CoA synthetase medium-chain family member 1                              | 0006629 // lipid metabolic process // inferred from electronic annotation//0006631 // fatty acid metabolic process // ir  |
| 0.009393 | 197.96646          | 146.96428         | NM_001102404 | //NM_1-1.35    |    | <b>Acp5</b>               | acyl phosphatase 5, tartrate-resistant family                                 | 0006470 // protein dephosphorylation // inferred from electronic annotation//0016311 // dephosphorylation // inferre      |
| 0.009393 | 82.71533           | 61.67905          | NR_003964    | //NM_0237-1.34 |    | <b>Tubb2o-ps2//Tubb2b</b> | tubulin, beta 2a, pseudogene 2//tubulin, beta 2B class IIB                    | 0001764 // neuron migration // not recorded//0007017 // microtubule-based process // inferred from electronic annot       |
| 0.009035 | 416.94724          | 312.54208         | NM_001127233 | //NM_1-1.33    |    | <b>Trp53</b>              | transformation related protein 53                                             | 0000660 // protein import into nucleus, translocation // inferred from direct assay//0000122 // negative regulation of t  |
| 0.009539 | 2649.8318          | 1989.797          | NM_001252476 | //NM_1-1.33    |    | <b>Prmt1</b>              | protein arginine N-methyltransferase 1                                        | 0001701 // in utero embryonic development // inferred from mutant phenotype//0006355 // regulation of transcrip           |
| 0.009539 | 225.13934          | 169.49669         | NM_019547    | //XM_0061-1.33 |    | <b>Rbm38</b>              | RNA binding motif protein 38                                                  | 0006397 // mRNA processing // inferred from electronic annotation//0006977 // DNA damage response, signal transdu         |
| 0.009539 | 343.71655          | 259.67032         | NM_010478    | -1.32          |    | <b>Hspa1b</b>             | heat shock protein 1B                                                         | 0007339 // binding of sperm to zona pellucida // inferred from direct assay//0009408 // response to heat // inferred fr   |
| 0.009539 | 634.3614           | 479.27847         | NM_001290667 | //NM_1-1.32    |    | <b>Chac2</b>              | ChaC, cation transport regulator 2                                            | 0008152 // metabolic process // inferred from electronic annotation                                                       |
| 0.007904 | 782.0202           | 591.61865         | NM_025954    | -1.32          |    | <b>Pgp</b>                | phosphoglycolate phosphatase                                                  | 0005975 // carbohydrate metabolic process // inferred from electronic annotation//0008152 // metabolic process // in      |
| 0.009838 | 676.9084           | 515.1457          | NM_015800    | //XM_0061-1.31 |    | <b>Crim1</b>              | cysteine rich transmembrane BMP regulator 1 (chordin like)                    | 0001558 // regulation of cell growth // inferred from electronic annotation//0010951 // negative regulation of endopep    |
| 0.009515 | 138.16159          | 105.437546        | NM_001202445 | //NM_1-1.31    |    | <b>Mapk8ip1</b>           | mitogen-activated protein kinase 8 interacting protein 1                      | 0006355 // regulation of transcription, DNA-templated // inferred from direct assay//0007165 // signal transduction //    |
| 0.00948  | 151.6453           | 115.771126        | NM_008396    | -1.31          |    | <b>Itna2</b>              | integrin alpha 2                                                              | 0002687 // positive regulation of leukocyte migration // not recorded//0006929 // substrate-dependent cell migration ,    |
| 0.009035 | 514.3032           | 393.19016         | NM_009266    | -1.31          |    | <b>Seps2</b>              | selenophosphate synthetase 2                                                  | 0001887 // selenium compound metabolic process // inferred from direct assay//0001887 // selenium compound meta           |
| 0.009035 | 857.5765           | 656.29474         | NM_001030307 | //XM_1-1.31    |    | <b>Dkc1</b>               | dykerkeratosis congenita 1, dyskerin                                          | 0000154 // rRNA modification // not recorded//0000495 // box H/AACA snoRNA 3'-end processing // not recorded//000         |
| 0.009539 | 85.157585          | 65.53217          | NM_009400    | //NM_0211-1.30 |    | <b>Tnfrsf18</b>           | tumor necrosis factor receptor superfamily, member 18                         | 0002687 // positive regulation of leukocyte migration // not recorded//0006915 // apoptotic process // inferred from e    |
| 0.009539 | 454.66617          | 351.08884         | NM_001291128 | //NM_1-1.30    |    | <b>Nnat</b>               | neuronatin                                                                    | 0007275 // multicellular organismal development // inferred from electronic annotation//0007420 // brain developme        |
| 0.009515 | 1189.5702          | 919.7363          | NM_025584    | -1.29          |    | <b>Cd99</b>               | CD99 antigen                                                                  | 0001773 // myeloid dendritic cell activation // inferred from direct assay                                                |
| 0.009657 | 1411.8641          | 1096.1992         | NM_018868    | //XM_0061-1.29 |    | <b>Nops8</b>              | NOPS8 ribonucleoprotein                                                       | 0000154 // rRNA modification // not recorded//0006608 // snRNP protein import into nucleus // not recorded//00422         |
| 0.009515 | 698.4649           | 542.6236          | NM_001001493 | //XM_1-1.29    |    | <b>Gm2573//Wdr83os</b>    | predicted gene 2573//WD repeat domain 83 opposite strand                      |                                                                                                                           |
| 0.009515 | 785.9864           | 613.72473         | NM_001033536 | //XM_1-1.28    |    | <b>Rfx7</b>               | regulatory factor X, 7                                                        | 0006355 // regulation of transcription, DNA-templated // inferred from electronic annotation//0006357 // regulation o     |
| 0.009539 | 1795.9786          | 1406.2979         | NM_026027    | -1.28          |    | <b>Pfdn1</b>              | profilin 1                                                                    | 0006457 // protein folding // inferred from electronic annotation//0021537 // telencephalon development // inferred fr    |
| 0.009539 | 1325.4642          | 1038.1267         | NM_026122    | //NM_1751-1.28 |    | <b>Himgn3</b>             | high mobility group nucleosomal binding domain 3                              | 0006357 // regulation of transcription from RNA polymerase II promoter // inferred from mutant phenotype//0016568         |
| 0.009035 | 572.92474          | 451.67682         | NM_023203    | -1.27          |    | <b>Dctpp1</b>             | dCTP pyrophosphatase 1                                                        | 0009143 // nucleoside triphosphate catabolic process // inferred from direct assay//0051289 // protein homotetramer       |
| 0.009539 | 663.1274           | 525.63696         | NM_026845    | -1.26          |    | <b>Ppil1</b>              | peptidylprolyl isomerase (cyclophilin)-like 1                                 | 0000413 // protein peptidyl-prolyl isomerization // not recorded//0006397 // mRNA processing // inferred from direct      |
| 0.009539 | 589.9028           | 467.6986          | NM_001302163 | //NM_1-1.26    |    | <b>Acs1l</b>              | acyl-CoA synthetase long-chain family member 1                                | 0001676 // long-chain fatty acid metabolic process // not recorded//0006629 // lipid metabolic process // inferred from   |
| 0.009035 | 1009.2893          | 804.79645         | NM_010411    | //XR_3859-1.25 |    | <b>Hdac3</b>              | histone deacetylase 3                                                         | 0001022 // negative regulation of transcription from RNA polymerase II promoter // inferred from genetic interaction//    |
| 0.009515 | 259.44144          | 206.95248         | NM_027297    | //XM_0061-1.25 |    | <b>Prpf4</b>              | PRP4 pre-mRNA processing factor 4 homolog (yeast)                             | 0000398 // mRNA splicing, via spliceosome // not recorded//0006397 // mRNA processing // inferred from electronic ar      |
| 0.009035 | 453.9274           | 362.52117         | NM_019816    | //XM_0061-1.25 |    | <b>Autf</b>               | apoptosis antagonizing transcription factor                                   | 0006357 // regulation of transcription from RNA polymerase II promoter // not recorded//0006974 // cellular response      |
| 0.009515 | 687.4245           | 549.7506          | NM_001252450 | //NM_1-1.25    |    | <b>Cldnd1</b>             | claudin domain containing 1                                                   |                                                                                                                           |
| 0.009539 | 1186.0769          | 950.7319          | NM_025507    | -1.25          |    | <b>Snw1</b>               | SNW domain containing 1                                                       | 0000122 // negative regulation of transcription from RNA polymerase II promoter // not recorded//0000398 // mRNA s        |
| 0.009539 | 695.9858           | 558.87134         | NM_026742    | -1.25          |    | <b>Ndujaf4</b>            | NADH dehydrogenase (ubiquinone) 1 alpha subcomplex, assembly factor 4         | 0008284 // positive regulation of cell proliferation // not recorded//0010257 // NADH dehydrogenase complex assembl       |
| 0.009515 | 963.01416          | 774.43896         | NM_025544    | -1.24          |    | <b>Mras15</b>             | mitochondrial ribosomal protein S15                                           | 0006412 // translation // inferred from electronic annotation//0032543 // mitochondrial translation // inferred from se   |
| 0.009539 | 1239.7227          | 997.7482          | NM_019657    | -1.24          |    | <b>Hsd17b12</b>           | hydroxysteroid (17-beta) dehydrogenase 12                                     | 0006629 // lipid metabolic process // inferred from electronic annotation//0006633 // fatty acid biosynthetic process //  |
| 0.009035 | 871.2057           | 701.7155          | NM_001035228 | //NM_1-1.24    |    | <b>St3gal5</b>            | ST3 beta-galactoside alpha-2,3-sialyltransferase 5                            | 0001574 // ganglioside biosynthetic process // not recorded//0006486 // protein glycosylation // inferred from elect      |
| 0.009393 | 1185.0565          | 954.66797         | NM_001003913 | //NM_1-1.24    |    | <b>Mars</b>               | methionine-tRNA synthetase                                                    | 0006412 // translation // inferred from electronic annotation//0006418 // tRNA aminoacylation for protein translation     |
| 0.009515 | 334.53293          | 269.49628         | NM_025903    | //XM_0111-1.24 |    | <b>Ifrd2</b>              | interferon-related developmental regulator 2                                  |                                                                                                                           |
| 0.009393 | 337.53903          | 272.58347         | NM_016856    | //XM_0061-1.24 |    | <b>Cpsf2</b>              | cleavage and polyadenylation specific factor 2                                |                                                                                                                           |
| 0.009539 | 64.897865          | 52.419785         | NM_001312906 | //NM_1-1.24    |    | <b>Hnf4a</b>              | hepatic nuclear factor 4, alpha                                               | 0006378 // mRNA polyadenylation // inferred from electronic annotation//0006379 // mRNA cleavage // inferred from         |
| 0.009539 | 503.20862          | 406.62573         | NM_019553    | -1.24          |    | <b>Ddx21</b>              | DEAD (Asp-Glu-Ala-Asp) box polypeptide 21                                     | 0006351 // transcription, DNA-templated // inferred from electronic annotation//0006355 // regulation of transcrip        |
| 0.009515 | 909.7652           | 738.1548          | NM_001033966 | //NM_1-1.23    |    | <b>Ak2</b>                | adenylate kinase 2                                                            | 0001649 // osteoblast differentiation // not recorded//0006351 // transcription, DNA-templated // inferred from electr    |
| 0.009838 | 159.77129          | 129.77583         | NM_080457    | //NM_183-1.23  |    | <b>Muc4</b>               | mucin 4                                                                       | 0006139 // nucleobase-containing compound metabolic process // inferred from electronic annotation//0006172 // AC         |
| 0.009539 | 285.77148          | 232.21115         | NM_027242    | //XM_0061-1.23 |    | <b>Ppp1r35</b>            | protein phosphatase 1, regulatory subunit 35                                  | 0001923 // negative regulation of phosphatase activity // not recorded                                                    |
| 0.009838 | 64.23175           | 52.348244         | NM_001077514 | //NM_1-1.23    |    | <b>Slc1a2</b>             | solute carrier family 1 (glial high affinity glutamate transporter), member 2 | 0006810 // transport // inferred from electronic annotation//0006835 // dicarboxylic acid transport // inferred from ele  |
| 0.009539 | 266.27518          | 217.09465         | NM_001163283 | //NM_1-1.23    |    | <b>Zbtb5</b>              | zinc finger and BTB domain containing 5                                       | 0006351 // transcription, DNA-templated // inferred from electronic annotation//0006355 // regulation of transcrip        |
| 0.009515 | 429.2057           | 350.48245         | NM_001085390 | -1.22          |    | <b>Dusp5</b>              | dual specificity phosphatase 5                                                | 0000188 // inactivation of MAPK activity // not recorded//0001706 // endoderm formation // not recorded//0006470          |
| 0.009539 | 231.37968          | 189.52222         | NM_033573    | -1.22          |    | <b>Prcc</b>               | papillary renal cell carcinoma (translocation-associated)                     | 0007093 // mitotic cell cycle checkpoint // not recorded                                                                  |
| 0.009515 | 1644.7557          | 1353.1824         | NM_001304528 | //NM_1-1.22    |    | <b>Ahcy//Gm4737</b>       | S-adenosylhomocysteine hydrolase//predicted gene 4737                         | 0002439 // chronic inflammatory response to antigenic stimulus // not recorded//0006730 // one-carbon metabolic pr        |
| 0.009755 | 432.92596          | 357.80963         | NM_026660    | //XM_0061-1.21 |    | <b>Mfsd10</b>             | major facilitator superfamily domain containing 10                            | 0006810 // transport // inferred from electronic annotation//0006915 // apoptotic process // inferred from electronic     |
| 0.009539 | 235.79848          | 194.93832         | NM_145365    | //XM_0111-1.21 |    | <b>Creb3lf</b>            | cAMP responsive element binding protein 3-like 3                              | 0006351 // transcription, DNA-templated // inferred from electronic annotation//0006355 // regulation of transcrip        |
| 0.009515 | 439.4294           | 364.59235         | NM_001038230 | //NM_1-1.21    |    | <b>Anapc11</b>            | anaphase promoting complex subunit 11                                         | 0007049 // cell cycle // inferred from electronic annotation//0007067 // mitotic nuclear division // inferred from electr |
| 0.009539 | 510.38306          | 424.5472          | NM_010817    | -1.20          |    | <b>Psm2</b>               | proteasome (prosome, macropain) 26S subunit, non-ATPase, 7                    | 0043161 // proteasome-mediated ubiquitin-dependent protein catabolic process // not recorded                              |
| 0.009539 | 2587.43            | 2155.1052         | NM_144784    | -1.20          |    | <b>Acat1</b>              | acyetyl-Coenzyme A acetyltransferase 1                                        | 0001889 // liver development // inferred from electronic annotation//0007420 // brain development // inferred from e      |
| 0.009539 | 328.1385           | 275.55862         | NM_028428    | -1.19          |    | <b>Fut11</b>              | fucosyltransferase 11                                                         | 0006486 // protein glycosylation // inferred from electronic annotation//0036065 // fucosylation // inferred from elect   |
| 0.009539 | 551.38324          | 464.7824          | NM_025840    | //XM_0061-1.19 |    | <b>Bzw2</b>               | basic leucine zipper and W2 domains 2                                         | 0007275 // multicellular organismal development // inferred from electronic annotation//0007399 // nervous system d       |
| 0.009515 | 15.254267          | 17.774426         | NM_008671    | 1.17           |    | <b>Nap12</b>              | nucleosome assembly protein 1-like 2                                          | 0006334 // nucleosome assembly // inferred from electronic annotation//0035066 // positive regulation of histone ac       |
| 0.009393 | 15.830147          | 18.650099         | NM_011023    | 1.18           |    | <b>Otx1</b>               | orthodenticle homolog 1                                                       | 0006355 // regulation of transcription, DNA-templated // inferred from electronic annotation//0006357 // regulation o     |
| 0.009539 | 44.71552           | 53.331398         | NM_001177366 | //NM_1-1.19    |    | <b>Fut7</b>               | fucosyltransferase 7                                                          | 0002361 // CD4-positive, CD25-positive, alpha-beta regulatory T cell differentiation // inferred from mutant phenotype/   |
| 0.009838 | 98.30729           | 117.45883         | NM_001024700 | 1.19           |    | <b>Igh-V1558//Igha</b>    | immunoglobulin heavy chain (I558 family)//immunoglobulin heavy constant alpha | 0002385 // mucosal immune response // inferred from direct assay//0002455 // humoral immune response mediated i           |
| 0.009539 | 25.095377          | 30.028923         | NR_110482    | 1.20           |    | <b>Gm38403</b>            | predicted gene, 38403                                                         |                                                                                                                           |
| 0.009838 | 71.126236          | 85.54989          | NM_176987    | //XM_0061-1.20 |    | <b>Simc1</b>              | SUMO-interacting motifs containing 1                                          |                                                                                                                           |
| 0.009539 | 20.03472           | 24.266289         | NM_176848    | //XM_0061-1.21 |    | <b>Fbxo2</b>              | F-box protein 2                                                               | 0006511 // ubiquitin-dependent protein catabolic process // inferred from direct assay//0006516 // glycoprotein catab     |
| 0.009539 | 90.46158           | 109.88717         | NM_053255    | //XM_0111-1.21 |    | <b>Elac1</b>              | elaC homolog 1 (E. coli)                                                      | 0008033 // rRNA processing // inferred from electronic annotation//0034414 // tRNA 3'-trailer cleavage, endonucleolyt     |
| 0.009838 | 177.27383          | 216.18193         | NM_023750    | 1.22           |    | <b>Zfp84</b>              | zinc finger protein 84                                                        | 0006355 // regulation of transcription, DNA-templated // inferred from electronic annotation                              |
| 0.009539 | 34.521523          | 42.238297         | NR_033221    | 1.22           |    | <b>BC031361</b>           | cDNA sequence BC031361                                                        |                                                                                                                           |
| 0.009515 | 40.641575          | 49.79235          | NM_001079873 | //NM_1-1.23    |    | <b>Brdt</b>               | bromodomain, testis-specific                                                  | 0001207 // histone displacement // inferred from mutant phenotype//0006338 // chromatin remodeling // inferred fr         |
| 0.009515 | 81.076225          | 99.432945         | NM_013904    | 1.23           |    | <b>Hey2</b>               | hairly/enhancer-of-split related with YRPW motif 2                            | 0000122 // negative regulation of transcription from RNA polymerase II promoter // inferred from direct assay//000012     |
| 0.009515 | 40.186634          | 49.31             | NM_010341    | 1.23           |    | <b>Nmur1</b>              | neuromedin I receptor 1                                                       | 0006816 // calcium ion transport // not recorded//0006821 // chloride transport // not recorded//0006939 // smooth        |
| 0.009539 | 41.73369           | 51.33612          | NM_145603    | //NR_0337-1.23 |    | <b>Ces2c//Ces2d-ps</b>    | carboxylesterase 2C//carboxylesterase 2D, pseudogene                          | 0001101 // response to acid chemical // inferred from direct assay//0008152 // metabolic process // inferred from elec    |
| 0.009515 | 117.33529          | 145.04886         | NM_025943    | //NR_1307-1.24 |    | <b>Dzip1</b>              | DAZ interacting protein 1                                                     | 0007224 // smoothened signaling pathway // inferred from mutant phenotype//0007275 // multicellular organismal de         |

| p (Corr) | [C3H/HeN, P5][raw] | [Gsr-KO, P5][raw] | RefSeq       | Transcript ID | FD   | Gene Symbol                      | Gene Title                                                                                                    | Gene Ontology Biological Process                                                                                                                      |
|----------|--------------------|-------------------|--------------|---------------|------|----------------------------------|---------------------------------------------------------------------------------------------------------------|-------------------------------------------------------------------------------------------------------------------------------------------------------|
| 0.009539 | 68.9773            | 85.47465          | NM_001243741 | NM_1.24       | 1.24 | <b>C87436</b> ///Gm38849         | expressed sequence C87436//predicted gene, 38849                                                              |                                                                                                                                                       |
| 0.009838 | 666.24347          | 826.46735         | NM_020625    | XM_0061.24    | 1.24 | <b>Zbtb22</b>                    | zinc finger and BTB domain containing 22                                                                      | 0006351 // transcription, DNA-templated // inferred from electronic annotation//0006355 // regulation of transcription                                |
| 0.009838 | 9509.946           | 11800.324         | NM_013755    | XM_0061.24    | 1.24 | <b>Gyg</b>                       | glycogen                                                                                                      | 0005978 // glycogen biosynthetic process // not recorded//0008152 // metabolic process // inferred from electronic annotation                         |
| 0.009838 | 329.86398          | 409.743           | NM_145151    | NR_0734.124   | 1.24 | <b>Crebf</b>                     | CREB/ATF bZIP transcription factor                                                                            | 0006351 // transcription, DNA-templated // not recorded//0006355 // regulation of transcription, DNA-templated // inferred from electronic annotation |
| 0.009539 | 62.271606          | 77.42998          | XR_377689    | NR_40338.124  | 1.24 | <b>Gm16499</b>                   | predicted gene 16499                                                                                          |                                                                                                                                                       |
| 0.009393 | 118.81321          | 147.82677         | NM_130882    | XM_0061.24    | 1.24 | <b>Cyp4f13</b>                   | cytochrome P450, family 4, subfamily 1, polypeptide 13                                                        | 0006691 // leukotriene metabolic process // not recorded//0055114 // oxidation-reduction process // inferred from electronic annotation               |
| 0.009539 | 115.48705          | 143.71123         | NM_001168564 | NM_1.24       | 1.24 | <b>Kcns3</b>                     | potassium voltage-gated channel, delayed-rectifier, subfamily 5, member 3                                     | 0006810 // transport // inferred from electronic annotation//0006811 // ion transport // inferred from electronic annotation                          |
| 0.009539 | 244.16508          | 304.57812         | NM_194346    | XM_0061.25    | 1.25 | <b>Rnf31</b>                     | ring finger protein 31                                                                                        | 0002029 // protein polyubiquitination // not recorded//0016567 // protein ubiquitination // inferred from mutant phenotype                            |
| 0.009838 | 2020.9365          | 2524.2908         | NM_001163635 | XM_1.25       | 1.25 | <b>Tnks2</b>                     | tankyrase, TRF1-interacting ankyrin-related ADP-ribose polymerase 2                                           | 0002029 // protein polyubiquitination // not recorded//0000723 // telomere maintenance // inferred from mutant phenotype                              |
| 0.009539 | 8101.5117          | 10130.0625        | NM_009932    |               | 1.25 | <b>Col4a2</b>                    | collagen, type IV, alpha 2                                                                                    | 0001525 // angiogenesis // inferred from electronic annotation//0006351 // transcription, DNA-templated // inferred from mutant phenotype             |
| 0.009539 | 1276.4156          | 1596.5925         | NM_001081364 | NM_1.25       | 1.25 | <b>Arhgap21</b>                  | Rho GTPase activating protein 21                                                                              | 0007030 // Golgi organization // not recorded//0007165 // signal transduction // inferred from electronic annotation//                                |
| 0.009515 | 37.730293          | 47.209244         | NM_175514    | XM_0061.25    | 1.25 | <b>Fam171b</b>                   | family with sequence similarity 171, member 8                                                                 |                                                                                                                                                       |
| 0.009539 | 1140.678           | 1428.8904         | NM_019767    |               | 1.25 | <b>Arpc1a</b>                    | actin related protein 2/3 complex, subunit 1A                                                                 | 0030833 // regulation of actin filament polymerization // inferred from electronic annotation//0034314 // Arp2/3 complex                              |
| 0.009838 | 27.220903          | 34.211407         | NM_001272057 | NM_1.26       | 1.26 | <b>Adam5</b>                     | a disintegrin and metalloproteinase domain 5                                                                  | 0006508 // proteolysis // inferred from electronic annotation                                                                                         |
| 0.009838 | 328.1849           | 412.80176         | NM_001110253 | NM_1.26       | 1.26 | <b>Fyca1</b>                     | FYVE and coiled-coil domain containing 1                                                                      | 0006810 // transport // inferred from electronic annotation//0072383 // plus-end-directed vesicle transport along microtubule                         |
| 0.009539 | 33.495815          | 42.134575         | NM_053250    | NM_1811.26    | 1.26 | <b>Crip3</b>                     | cysteine-rich protein 3                                                                                       | 0042098 // cell proliferation // inferred from mutant phenotype                                                                                       |
| 0.009838 | 360.62012          | 453.7087          | NM_0017378   |               | 1.26 | <b>Pcdh12</b>                    | protocadherin 12                                                                                              | 0005977 // glycogen metabolic process // inferred from mutant phenotype//0007155 // cell adhesion // inferred from mutant phenotype                   |
| 0.009539 | 70.070786          | 88.25277          | NM_001136496 | NM_1.26       | 1.26 | <b>Zfp935</b>                    | zinc finger protein 935                                                                                       | 0006355 // regulation of transcription, DNA-templated // inferred from electronic annotation                                                          |
| 0.009582 | 192.0062           | 241.86015         | NM_173865    |               | 1.26 | <b>Sic41a1</b>                   | solute carrier family 41, member 1                                                                            | 0006810 // transport // inferred from electronic annotation//0006811 // ion transport // inferred from electronic annotation                          |
| 0.009035 | 132.09906          | 166.5039          | NM_027007    | XM_0061.26    | 1.26 | <b>Zfp397</b>                    | zinc finger protein 397                                                                                       | 0006351 // transcription, DNA-templated // inferred from electronic annotation//0006355 // regulation of transcription                                |
| 0.009838 | 760.297            | 961.42017         | NM_001081241 | XM_1.26       | 1.26 | <b>Fam65a</b>                    | family with sequence similarity 65, member A                                                                  |                                                                                                                                                       |
| 0.009721 | 1276.3322          | 1616.231          | NM_010761    | XM_0061.27    | 1.27 | <b>Cndbp1</b>                    | cyclin D-type binding-protein 1                                                                               | 0007049 // cell cycle // inferred from electronic annotation//0051726 // regulation of cell cycle // inferred from electronic annotation              |
| 0.009539 | 133.90605          | 169.81232         | XM_006517803 | XM_1.27       | 1.27 | <b>D130037M23Rik</b>             | RIKEN cDNA D130037M23 gene                                                                                    |                                                                                                                                                       |
| 0.009393 | 435.22348          | 552.22626         | NM_029788    |               | 1.27 | <b>Rnft1</b>                     | ring finger protein, transmembrane 1                                                                          |                                                                                                                                                       |
| 0.009801 | 165.18332          | 210.24138         | NM_001039951 | NM_1.27       | 1.27 | <b>Zfp606</b>                    | zinc finger protein 606                                                                                       | 0006355 // regulation of transcription, DNA-templated // not recorded                                                                                 |
| 0.009539 | 37.738472          | 48.03753          | NM_001005232 |               | 1.27 | <b>Dbx1</b>                      | developing brain homeobox 1                                                                                   | 0006355 // regulation of transcription, DNA-templated // inferred from electronic annotation//0006357 // regulation of transcription                  |
| 0.009515 | 30.937084          | 39.39259          | NM_001104482 | NM_1.27       | 1.27 | <b>Mrap2</b>                     | melanocortin 2 receptor accessory protein 2                                                                   | 0006112 // energy reserve metabolic process // inferred from mutant phenotype//0007631 // feeding behavior // inferred from mutant phenotype          |
| 0.009035 | 98.88922           | 126.10651         | NM_025981    | XM_0061.28    | 1.28 | <b>2810416G20Rik</b> ///LOC10264 | RIKEN cDNA 2810416G20 gene//uncharacterized LOC102642487                                                      |                                                                                                                                                       |
| 0.009515 | 56.52688           | 71.152306         | NR_045164    |               | 1.28 | <b>Sic2a4rg-ps</b>               | Sic2a4 regulator, pseudogene                                                                                  |                                                                                                                                                       |
| 0.009539 | 357.88156          | 456.92197         | NM_007772    | XM_0061.28    | 1.28 | <b>Hivep1</b>                    | human immunodeficiency virus type I enhancer binding protein 1                                                | 0000122 // negative regulation of transcription from RNA polymerase II promoter // inferred from direct assay//000012                                 |
| 0.009035 | 23.108797          | 29.550993         | NM_010846    | NR_0035.28    | 1.28 | <b>Mx1</b>                       | MX dynamin-like GTPase 1                                                                                      | 0002376 // immune system process // inferred from electronic annotation//0008152 // metabolic process // inferred from mutant phenotype               |
| 0.009515 | 155.8945           | 199.79364         | NM_001311069 | NM_1.28       | 1.28 | <b>Dixdc1</b>                    | DIX domain containing 1                                                                                       | 0007049 // cell cycle // inferred from mutant phenotype//0007275 // multicellular organismal development // inferred from mutant phenotype            |
| 0.009539 | 27.122637          | 34.801304         | NM_198621    |               | 1.28 | <b>Cct8l1</b>                    | chaperonin containing TCP1, subunit 8 (theta)-like 1                                                          | 0006457 // protein folding // inferred from electronic annotation                                                                                     |
| 0.009515 | 389.0285           | 499.26144         | NM_001164056 | NM_1.28       | 1.28 | <b>Pld1</b>                      | phospholipase D1                                                                                              | 0006629 // lipid metabolic process // inferred from electronic annotation//0006643 // membrane lipid metabolic process                                |
| 0.009539 | 126.22039          | 162.15186         | NM_001291047 | NM_1.28       | 1.28 | <b>Ypel1</b>                     | yippee-like 1 (Drosophila)                                                                                    |                                                                                                                                                       |
| 0.009515 | 3079.7148          | 3961.3894         | NM_024473    |               | 1.29 | <b>BC005537</b>                  | cDNA sequence BC005537                                                                                        |                                                                                                                                                       |
| 0.009035 | 153.61166          | 197.64618         | NM_001290720 | NM_1.29       | 1.29 | <b>Tsgo10</b>                    | testis specific 10                                                                                            | 0030031 // cell projection assembly // inferred from mutant phenotype                                                                                 |
| 0.009515 | 561.0085           | 723.5869          | NM_001163475 | XM_1.29       | 1.29 | <b>Zfp746</b>                    | zinc finger protein 746                                                                                       | 0000122 // negative regulation of transcription from RNA polymerase II promoter // inferred from direct assay//000012                                 |
| 0.009539 | 1456.5138          | 1881.6926         | NM_175134    | XM_0061.29    | 1.29 | <b>Ankrd46</b>                   | ankyrin repeat domain 46                                                                                      |                                                                                                                                                       |
| 0.009515 | 64.59649           | 83.649956         | NM_001146046 | NM_1.29       | 1.29 | <b>Lrrc49</b>                    | leucine rich repeat containing 49                                                                             |                                                                                                                                                       |
| 0.009539 | 125.48795          | 162.6137          | NM_001159317 | NM_1.30       | 1.30 | <b>Il1rap</b>                    | interleukin 1 receptor accessory protein                                                                      | 0002376 // immune system process // inferred from electronic annotation//0006954 // inflammatory response // inferred from mutant phenotype           |
| 0.009515 | 234.31003          | 303.73087         | NM_001133333 | NM_1.30       | 1.30 | <b>Cry2</b>                      | cryptochrome 2 (photolyase-like)                                                                              | 0000122 // negative regulation of transcription from RNA polymerase II promoter // not recorded//0006281 // DNA replication                           |
| 0.009539 | 308.44458          | 399.93097         | NM_001195633 | XM_1.30       | 1.30 | <b>Epg5</b>                      | ectopic P-granules autophagy protein 5 homolog (C. elegans)                                                   | 0006914 // autophagy // inferred from mutant phenotype//0032456 // endocytic recycling // inferred from mutant phenotype                              |
| 0.009394 | 585.879            | 760.0992          | NM_001098233 | NM_1.30       | 1.30 | <b>Purg</b>                      | purine-rich element binding protein 6                                                                         |                                                                                                                                                       |
| 0.009539 | 626.092            | 812.32465         | NM_133821    |               | 1.30 | <b>Phlpp1</b>                    | PH domain and leucine rich repeat protein phosphatase 1                                                       | 0001932 // regulation of protein phosphorylation // not recorded//0002667 // regulation of T cell energy // inferred from mutant phenotype            |
| 0.009515 | 484.48434          | 628.6416          | NM_009811    |               | 1.30 | <b>Casp6</b>                     | caspace 6                                                                                                     | 0002525 // acute inflammatory response to non-antigenic stimulus // not recorded//0006508 // proteolysis // not recorded                              |
| 0.009539 | 603.2058           | 782.78564         | NM_018869    | XM_0061.30    | 1.30 | <b>Grk5</b>                      | G protein-coupled receptor kinase 5                                                                           | 0002029 // desensitization of G-protein coupled receptor protein signaling pathway // not recorded//0006468 // protein processing                     |
| 0.009539 | 296.29507          | 384.67972         | NM_172689    |               | 1.30 | <b>Ddx58</b>                     | DEAD (Asp-Glu-Ala-Asp) box polypeptide 58                                                                     | 0002230 // positive regulation of defense response to virus by host // not recorded//0002376 // immune system process                                 |
| 0.009539 | 329.23483          | 428.31912         | NM_177732    | XM_0061.30    | 1.30 | <b>Sic35d1</b>                   | solute carrier family 35 (UDP-glucuronic acid/UDP-N-acetylgalactosamine dual transporter), member 1           | 0015781 // pyrimidine nucleotide-sugar transport // inferred from direct assay//0030206 // chondroitin sulfate biosynthesis                           |
| 0.009539 | 418.5663           | 546.51855         | NM_030253    | XM_0061.31    | 1.31 | <b>Parp9</b>                     | poly (ADP-ribose) polymerase family, member 9                                                                 | 0006281 // DNA repair // inferred from electronic annotation//0006302 // double-strand break repair // not recorded//                                 |
| 0.009539 | 770.3314           | 1006.33606        | NM_001161817 | NM_1.31       | 1.31 | <b>Myo1b</b>                     | myosin IB                                                                                                     | 0006892 // post-Golgi vesicle-mediated transport // not recorded//0007015 // actin filament organization // not recorded                              |
| 0.009539 | 36.510136          | 47.803246         | NM_009509    | XM_0111.31    | 1.31 | <b>Vil1</b>                      | villin 1                                                                                                      | 0001951 // intestinal D-glucose absorption // inferred from genetic interaction//0006915 // apoptotic process // inferred from mutant phenotype       |
| 0.009035 | 41.369984          | 54.34814          | XR_106421    | XR_10756.131  | 1.31 | <b>Gm17501</b>                   | predicted gene, 17501                                                                                         |                                                                                                                                                       |
| 0.009515 | 136.4876           | 180.40723         | NM_172919    | XM_0061.32    | 1.32 | <b>Zfp846</b>                    | zinc finger protein 846                                                                                       | 0006355 // regulation of transcription, DNA-templated // not recorded                                                                                 |
| 0.009539 | 171.21489          | 226.58789         | NM_001164792 | NM_1.32       | 1.32 | <b>Tpbp</b>                      | trophoblast glycoprotein                                                                                      | 0051965 // positive regulation of synapse assembly // inferred from direct assay                                                                      |
| 0.009539 | 220.0344           | 291.39944         | NM_009180    | XR_3883.132   | 1.32 | <b>St6galnac2</b>                | ST6 (alpha-N-acetyl-neuraminyl-2,3-beta-galactosyl-1,3)-N-acetylgalactosaminide alpha-2,6-sialyltransferase 2 | 0001574 // ganglioside biosynthetic process // not recorded//0006486 // protein glycosylation // inferred from mutant phenotype                       |
| 0.009035 | 208.12044          | 275.67743         | NM_008137    |               | 1.32 | <b>Gna14</b>                     | guanine nucleotide binding protein, alpha 14                                                                  | 0007165 // signal transduction // inferred from electronic annotation//0007186 // G-protein coupled receptor signaling                                |
| 0.009515 | 62.23488           | 82.47314          | NM_020262    | XM_0061.33    | 1.33 | <b>Zfp109</b>                    | zinc finger protein 109                                                                                       | 0006355 // regulation of transcription, DNA-templated // inferred from electronic annotation                                                          |
| 0.009539 | 755.15295          | 1001.0058         | NM_010332    |               | 1.33 | <b>Ednra</b>                     | endothelin receptor type A                                                                                    | 0001569 // patterning of blood vessels // inferred from genetic interaction//0001666 // response to hypoxia // inferred from mutant phenotype         |
| 0.009515 | 525.23474          | 697.06226         | NM_001033217 | XM_1.33       | 1.33 | <b>Prickle1</b>                  | prickle homolog 1 (Drosophila)                                                                                | 0001843 // neural tube closure // not recorded//0006606 // protein import into nucleus // not recorded//00031398 //                                   |
| 0.009831 | 64.66972           | 85.87017          | NM_001200023 |               | 1.33 | <b>Zfp963</b>                    | zinc finger protein 963                                                                                       | 0006355 // regulation of transcription, DNA-templated // not recorded                                                                                 |
| 0.009141 | 175.53862          | 233.50746         | NM_153782    | XM_0061.33    | 1.33 | <b>Fam20a</b>                    | family with sequence similarity 20, member A                                                                  | 0001934 // positive regulation of protein phosphorylation // inferred from direct assay//0001934 // positive regulation of transcription              |
| 0.009515 | 138.31209          | 184.2994          | NM_001177752 | NM_1.33       | 1.33 | <b>Pfkfb3</b>                    | 6-phosphofructo-2-kinase/fructose-2,6-bisphosphatase 3                                                        | 0006000 // fructose metabolic process // inferred from electronic annotation//0006003 // fructose 2,6-bisphosphate metabolism                         |
| 0.009539 | 204.77612          | 273.3012          | NM_030168    | XM_0061.33    | 1.33 | <b>Rictor</b>                    | RICTOR independent companion of MTOR, complex 2                                                               | 0001932 // regulation of protein phosphorylation // inferred from mutant phenotype//0001938 // positive regulation of transcription                   |
| 0.009539 | 417.60373          | 557.38226         | NM_001164289 | NM_1.33       | 1.33 | <b>Phf11c</b> ///Phf11d          | PHD finger protein 11c//PHD finger protein 11d                                                                | 0006351 // transcription, DNA-templated // inferred from electronic annotation//0006355 // regulation of transcription                                |
| 0.00985  | 93.8642            | 125.77775         | NM_183254    | XM_0061.34    | 1.34 | <b>Fam229b</b>                   | family with sequence similarity 229, member B                                                                 |                                                                                                                                                       |
| 0.009035 | 1969.3298          | 2662.9504         | NM_001199186 | NM_1.35       | 1.35 | <b>Sic44a2</b>                   | solute carrier family 44, member 2                                                                            | 0006810 // transport // inferred from electronic annotation//0007165 // signal transduction // not recorded//004312                                   |
| 0.009035 | 579.5005           | 787.2598          | NM_001113386 | NM_1.36       | 1.36 | <b>Lifr</b>                      | leukemia inhibitory factor receptor                                                                           | 0008284 // positive regulation of cell proliferation // inferred from genetic interaction//0008284 // positive regulation of transcription            |
| 0.009539 | 27.542223          | 37.46456          | NM_175532    |               | 1.36 | <b>Nlrp10</b>                    | NLR family, pyrin domain containing 10                                                                        | 0002250 // adaptive immune response // inferred from electronic annotation//0002376 // immune system process // inferred from mutant phenotype        |
| 0.009539 | 452.46844          | 615.86365         | NM_001243908 | XM_1.36       | 1.36 | <b>Zfp383</b>                    | zinc finger protein 383                                                                                       | 0006355 // regulation of transcription, DNA-templated // inferred from electronic annotation                                                          |
| 0.009539 | 979.5401           | 1336.2693         | NM_001290659 | NM_1.36       | 1.36 | <b>Tanc1</b>                     | tetratricopeptide repeat, ankyrin repeat and coiled-coil containing 1                                         | 0007520 // myoblast fusion // inferred from mutant phenotype//0008542 // visual learning // inferred from mutant phenotype                            |
| 0.009539 | 186.42381          | 254.51581         | NM_001199048 | NR_0.137      | 1.37 | <b>Zfp942</b>                    | zinc finger protein 942                                                                                       | 0006355 // regulation of transcription, DNA-templated // inferred from electronic annotation                                                          |
| 0.009035 | 194.84016          | 266.33487         | NM_144873    | XM_0061.37    | 1.37 | <b>Uhrf2</b>                     | ubiquitin-like, containing PHD and RING finger domains 2                                                      | 0006511 // ubiquitin-dependent protein catabolic process // not recorded//0006511 // ubiquitin-dependent protein catabolic process                    |
| 0.009515 | 2735.611           | 3748.7139         | NM_001243199 | NM_1.37       | 1.37 | <b>Gimap4</b>                    | GTPase, IMAP family member 4                                                                                  |                                                                                                                                                       |
| 0.009035 | 280.86273          | 385.044           | NM_013881    | XM_0061.37    | 1.37 | <b>Ulk2</b>                      | unc-51 like kinase 2                                                                                          | 0000045 // autophagosome assembly // not recorded//0006468 // protein phosphorylation // inferred from electronic annotation                          |
| 0.009515 | 26.97145           | 37.005226         | NR_038032    |               | 1.37 | <b>Gm15663</b>                   | predicted gene 15663                                                                                          |                                                                                                                                                       |

| p [Corr] | [C3H/HeN, P5][raw] | [Gsr-KO, P5][raw] | RefSeq Transcript ID    | FD    | Gene Symbol                 | Gene Title                                                                                | Gene Ontology Biological Process                                                                                       |
|----------|--------------------|-------------------|-------------------------|-------|-----------------------------|-------------------------------------------------------------------------------------------|------------------------------------------------------------------------------------------------------------------------|
| 0.008771 | 97.42562           | 134.67738         | NM_007911//XM_0061.38   | 1.38  | <b>Efnb3</b>                | ephrin B3                                                                                 | 0007275 // multicellular organismal development // inferred from electronic annotation//0007399 // nervous system d    |
| 0.009035 | 356.06174          | 495.6695          | NM_001033851//NM_1.139  | 1.39  | <b>Cpne8</b>                | copine VIII                                                                               |                                                                                                                        |
| 0.009515 | 35.75946           | 49.786163         | NM_001081084            | 1.39  | <b>Cubn</b>                 | cubilin (intrinsic factor-cobalamin receptor)                                             | 0001701 // in utero embryonic development // not recorded//0006629 // lipid metabolic process // inferred from elect   |
| 0.009035 | 98.064575          | 137.12593         | NM_001143776//NM_1.140  | 1.40  | <b>Fam13c</b>               | family with sequence similarity 13, member C                                              |                                                                                                                        |
| 0.007904 | 101.20299          | 141.52968         | XR_870188//XR_87018     | 1.40  | <b>Gm29782</b>              | predicted gene, 29782                                                                     |                                                                                                                        |
| 0.009515 | 119.81094          | 168.41316         | NM_001039530//XM_1.141  | 1.41  | <b>Parp1</b>                | poly (ADP-ribose) polymerase family, member 14                                            | 0006351 // transcription, DNA-templated // inferred from electronic annotation//0006355 // regulation of transcription |
| 0.009838 | 241.15141          | 341.40613         | NM_175460//XM_0061.142  | 1.42  | <b>Nmnat2</b>               | nicotinamide nucleotide adenyltransferase 2                                               | 0006767 // water-soluble vitamin metabolic process // not recorded//0009058 // biosynthetic process // inferred from   |
| 0.009035 | 32.524933          | 46.156807         | NM_001045550//NM_1.142  | 1.42  | <b>Gm2083//Gm21320//Mup</b> | major urinary protein LOC100048885//predicted gene, 21320//major urinary protein 1//major | 0006112 // energy reserve metabolic process // inferred from sequence or structural similarity//0006112 // energy rese |
| 0.009838 | 438.85696          | 624.98376         | NM_001276719//NM_1.142  | 1.42  | <b>Ackr2</b>                | atypical chemokine receptor 2                                                             | 0006898 // receptor-mediated endocytosis // not recorded//0006935 // chemotaxis // inferred from electronic annotat    |
| 0.009515 | 87.13523           | 124.178055        | NM_027560//XM_0111.143  | 1.43  | <b>Arredc2</b>              | arrestin domain containing 2                                                              | 0007165 // signal transduction // inferred from electronic annotation                                                  |
| 0.009035 | 1273.1368          | 1817.7776         | NR_002321//NR_00231.143 | 1.43  | <b>Tug1</b>                 | taurine upregulated gene 1                                                                | 0042461 // photoreceptor cell development // inferred from mutant phenotype                                            |
| 0.009539 | 564.8375           | 806.9806          | NM_001310534//NM_1.143  | 1.43  | <b>Txndc16</b>              | thioredoxin domain containing 16                                                          | 0045454 // cell redox homeostasis // inferred from electronic annotation                                               |
| 0.009539 | 241.2777           | 347.8312          | NM_001033633            | 1.44  | <b>Slc2a13</b>              | solute carrier family 2 (facilitated glucose transporter), member 13                      | 0006810 // transport // inferred from electronic annotation//0008643 // carbohydrate transport // inferred from elect  |
| 0.009539 | 111.349304         | 160.87154         | NM_001164573//NM_1.144  | 1.44  | <b>Myo1h</b>                | myosin 1H                                                                                 | 0008152 // metabolic process // inferred from electronic annotation                                                    |
| 0.009515 | 78.335976          | 114.08768         | NM_175140//XM_0061.146  | 1.46  | <b>Chst8</b>                | carbohydrate (N-acetylgalactosamine 4-O) sulfotransferase 8                               | 0005975 // carbohydrate metabolic process // inferred from electronic annotation//0006790 // sulfur compound meta      |
| 0.009035 | 230.2688           | 339.45102         | NM_008987               | 1.47  | <b>Ptx3</b>                 | pentraxin related gene                                                                    | 0001878 // response to yeast // inferred from mutant phenotype//0008228 // opsonization // inferred from mutant pH     |
| 0.009035 | 93.00372           | 137.63376         | NM_001012324            | 1.48  | <b>Ecm2</b>                 | extracellular matrix protein 2, female organ and adipocyte specific                       | 0007409 // axonogenesis // not recorded//0010811 // positive regulation of cell-substrate adhesion // inferred from di |
| 0.009582 | 53.519703          | 79.219284         | NM_001164374//XM_1.148  | 1.48  | <b>Gm17455</b>              | predicted gene, 17455                                                                     |                                                                                                                        |
| 0.009035 | 816.0237           | 1209.8616         | NM_020052               | 1.48  | <b>Scube2</b>               | signal peptide, CUB domain, EGF-like 2                                                    |                                                                                                                        |
| 0.009539 | 783.3385           | 1162.6428         | NR_002840//NR_02851.148 | 1.48  | <b>Gas5//Snord47</b>        | growth arrest specific 5//small nucleolar RNA, C/D box 47                                 |                                                                                                                        |
| 0.009539 | 664.98114          | 992.8802          | NR_002896//NR_00441.149 | 1.49  | <b>Snhg1//Snord22</b>       | small nucleolar RNA host gene 1//small nucleolar RNA, C/D box 22                          |                                                                                                                        |
| 0.009539 | 1330.5524          | 1999.7644         | NM_053109//XM_0061.150  | 1.50  | <b>Clec2d</b>               | C-type lectin domain family 2, member d                                                   | 0006968 // cellular defense response // traceable author statement//0007165 // signal transduction // inferred from se |
| 0.007904 | 98.97489           | 153.05981         | NM_001289740//NM_1.155  | 1.55  | <b>Mturn</b>                | maturin, neural progenitor differentiation regulator homolog (Xenopus)                    | 0007275 // multicellular organismal development // inferred from electronic annotation//0048666 // neuron developm     |
| 0.009035 | 489.15015          | 765.87396         | NM_008326//XM_0061.157  | 1.57  | <b>Irgm1</b>                | immunity-related GTPase family M member 1                                                 | 0002376 // immune system process // inferred from electronic annotation//0006914 // autophagy // inferred from elec    |
| 0.009515 | 313.42593          | 493.61218         | NR_029656               | 1.57  | <b>Mirlet7d</b>             | microRNA let7d                                                                            | 0007566 // embryo implantation // inferred from direct assay//0030509 // BMP signaling pathway // inferred from dire   |
| 0.009838 | 238.08238          | 376.7505          | NM_019440               | 1.58  | <b>Irgm2</b>                | immunity-related GTPase family M member 2                                                 | 0034341 // response to interferon-gamma // inferred from direct assay//0034341 // response to interferon-gamma // i    |
| 0.009838 | 432.136            | 687.02563         | NM_001289492//NM_1.159  | 1.59  | <b>Gbp3</b>                 | guanylate binding protein 3                                                               | 0008152 // metabolic process // inferred from electronic annotation//0035458 // cellular response to interferon-beta / |
| 0.009539 | 305.10446          | 503.60126         | NM_001316729//NM_1.165  | 1.65  | <b>Qcct</b>                 | glutaminyl-peptide cyclotransferase (glutaminy) cyclase                                   | 0017186 // peptidyl-pyroglutamic acid biosynthetic process, using glutaminy-peptide cyclotransferase // not recorded   |
| 0.009515 | 142.237            | 236.04419         | NM_010114//NM_010.166   | 1.66  | <b>Klk1b22//Klk1b9</b>      | kallikrein 1-related peptidase b22//kallikrein 1-related peptidase b9                     | 0002526 // acute inflammatory response // --//0003073 // regulation of systemic arterial blood pressure // --//00061   |
| 0.009515 | 142.237            | 236.04419         | NM_010114//NM_010.166   | 1.66  | <b>Klk1b22//Klk1b9</b>      | kallikrein 1-related peptidase b22//kallikrein 1-related peptidase b9                     | 0002526 // acute inflammatory response // --//0003073 // regulation of systemic arterial blood pressure // --//00061   |
| 0.009539 | 23.49422           | 39.586937         | NM_027770//XM_0061.168  | 1.68  | <b>Col24a1</b>              | collagen, type XXIV, alpha 1                                                              | 0002244 // hematopoietic progenitor cell differentiation // inferred from mutant phenotype                             |
| 0.009539 | 305.28564          | 521.377           | NM_016704//XM_0061.171  | 1.71  | <b>C6</b>                   | complement component 6                                                                    | 0001701 // in utero embryonic development // inferred from genetic interaction//0001970 // positive regulation of act  |
| 0.009539 | 551.9062           | 970.214           | NM_001177980//NM_1.176  | 1.76  | <b>Pde4b</b>                | phosphodiesterase 4B, cAMP specific                                                       | 0001780 // neutrophil homeostasis // inferred from mutant phenotype//0006198 // cAMP catabolic process // inferred     |
| 0.009515 | 191.56723          | 340.33087         | NM_194330//XM_0061.178  | 1.78  | <b>Gbp6</b>                 | guanylate binding protein 6                                                               | 0006955 // immune response // inferred from mutant phenotype//0008152 // metabolic process // inferred from elect      |
| 0.003126 | 1671.4963          | 3212.4534         | NM_026432               | 1.92  | <b>Saraf</b>                | store-operated calcium entry-associated regulatory factor                                 | 0006810 // transport // inferred from electronic annotation//0006811 // ion transport // inferred from electronic anno |
| 0.009515 | 198.83435          | 450.50763         | NM_011854//XM_0061.227  | 2.27  | <b>Oas12</b>                | 2'-5' oligoadenylate synthetase-like 2                                                    | 0002376 // immune system process // inferred from electronic annotation//0006164 // purine nucleotide biosynthetic     |
| 0.009035 | 214.45288          | 1245.4403         | NM_010861//XM_0061.581  | 5.81  | <b>Myl2</b>                 | myosin, light polypeptide 2, regulatory, cardiac, slow                                    | 0002026 // regulation of the force of heart contraction // not recorded//0003007 // heart morphogenesis // inferred fr |
| 0.008933 | 92.58727           | 1654.6576         | NM_008725               | 17.87 | <b>Nppa</b>                 | natriuretic peptide type A                                                                | 0001666 // response to hypoxia // inferred from electronic annotation//0003085 // negative regulation of systemic art  |
