# Supplementary material for: Glutathione reductase deficiency alters lung development and hyperoxic responses in neonatal mice
Source: PubMed Central journal article supplement — Redox Biol. 2020 Nov 13;38:101797. doi: 10.1016/j.redox.2020.101797 (PMC7708869; doi:10.1016/j.redox.2020.101797), 2020-11-13
Supplement: mmc3.pdf [file mmc3.pdf]

Table S3. Lung genes (n=318) significantly different between wild-type (Gsr-WT) and glutathione reductase-deficient (Gsr-KO) mice at PND56 (moderated t-test, p < 0.01).

Blue(-): fold lower in Gsr-KO. Red : fold higher in Gsr-KO.

| p [Corr] | [C3H/HeN, P56][raw] | [Gsr-KO, P56][raw] | RefSeq Transcript ID | FD @PND56 | Gene Symbol       | Gene Title                                                                 | Gene Ontology Biological Process                                                                                                                                          |
|----------|---------------------|--------------------|----------------------|-----------|-------------------|----------------------------------------------------------------------------|---------------------------------------------------------------------------------------------------------------------------------------------------------------------------|
| 1.61E-04 | 1048.2871           | 101.53538          | NM_010344            | -10.32    | <i>Gsr</i>        | glutathione reductase                                                      | 0006749 // glutathione metabolic process // inferred by curator//0006749 // glutathione metabolic process // not recorded//0007283 // spermatogenesis // not r            |
| 0.04568  | 1695.0776           | 668.1192           | NM_172399//XM_006508 | -2.54     | <i>Ndnf</i>       | neuron-derived neurotrophic factor                                         | 0001525 // angiogenesis // not recorded//0001764 // neuron migration // not recorded//0002931 // response to ischemia // inferred from direct assay//0007263 // nec       |
| 0.040763 | 1907.629            | 848.30896          | NM_054077//XM_006525 | -2.25     | <i>Prepl</i>      | proline arginine-rich end leucine-rich repeat                              | 0007409 // axonogenesis // ---//0007569 // cell aging // inferred from direct assay//0018146 // keratan sulfate biosynthetic process // not recorded//0042340 // kera     |
| 0.041704 | 434.2309            | 221.01195          | NM_001081161//NM_00_ | -1.95     | <i>Fam117a1</i>   | family with sequence similarity 171, member A1                             |                                                                                                                                                                           |
| 0.026022 | 593.0906            | 305.6782           | NM_009252//XM_011244 | -1.94     | <i>Serpina3n</i>  | serine (or cysteine) peptidase inhibitor, clade A, member 3N               | 0006953 // acute-phase response // inferred from electronic annotation//0010466 // negative regulation of peptidase activity // inferred from electronic annotation//     |
| 0.034382 | 111.22671           | 57.724236          | NM_021332            | -1.93     | <i>Glyr</i>       | glycylglycine-like peptide 1 receptor                                      | 0006190 // response to stress // inferred from mutant phenotype//0007165 // signal transduction // inferred from electronic annotation//0007166 // cell surface rece      |
| 0.038405 | 338.4938            | 177.95528          | NM_145434            | -1.90     | <i>Nr1d1</i>      | nuclear receptor subfamily 1, group D, member 1                            | 000122 // negative regulation of transcription from RNA polymerase II promoter // not recorded//0005978 // glycogen biosynthetic process // inferred from mutant p        |
| 0.043007 | 1053.2932           | 563.1152           | NM_007734            | -1.87     | <i>Col4a3</i>     | collagen, type IV, alpha 3                                                 | 0006919 // activation of cysteine-type endopeptidase activity involved in apoptotic process // not recorded//0007155 // cell adhesion // inferred from electronic annot.  |
| 0.04941  | 2822.9595           | 1516.9738          | NM_009371//NM_02957  | -1.86     | <i>Tajfb2</i>     | transforming growth factor, beta receptor II                               | 0001569 // patterning of blood vessels // inferred from mutant phenotype//0001570 // vasculogenesis // inferred from mutant phenotype//0001701 // in utero embri          |
| 0.038405 | 1639.2592           | 889.60785          | NM_009538            | -1.84     | <i>Plagl1</i>     | pleiomorphic adenoma gene-like 1                                           | 0006351 // transcription, DNA-templated // inferred from electronic annotation//0006357 // regulation of transcription from RNA polymerase II promoter // inferred fr     |
| 0.024562 | 513.21954           | 279.34222          | NM_027289//XM_006518 | -1.84     | <i>Ntsdc2</i>     | 5'-nucleotidase domain containing 2                                        | 0006470 // protein dephosphorylation // ---//0016311 // dephosphorylation // ---                                                                                          |
| 0.038405 | 2763.3057           | 1514.9174          | NM_009502//XM_006518 | -1.82     | <i>Vcl</i>        | vinculin                                                                   | 0002009 // morphogenesis of an epithelium // not recorded//0007155 // cell adhesion // inferred from direct assay//0007160 // cell-matrix adhesion // inferred from       |
| 0.038405 | 2526.5679           | 1398.8287          | NM_010740            | -1.81     | <i>Cd93</i>       | CD93 antigen                                                               | 0002230 // positive regulation of defense response to virus by host // not recorded//0007155 // cell adhesion // inferred from electronic annotation//0016337 // singl    |
| 0.0401   | 4443.3164           | 269.60785          | NM_011595            | -1.79     | <i>Timpp3</i>     | tissue inhibitor of metalloproteinase 3                                    | 0007417 // central nervous system development // inferred from electronic annotation//0007568 // aging // inferred from electronic annotation//0009612 // respons         |
| 0.04941  | 480.23367           | 269.20834          | NM_027946            | -1.78     | <i>Dcaf7</i>      | DDI1 and CUL4 associated factor 7                                          | 0007275 // multicellular organismal development // inferred from electronic annotation//0016567 // protein ubiquitination // inferred from electronic annotati            |
| 0.038405 | 1142.0466           | 645.12634          | NM_033565//XM_006498 | -1.77     | <i>Klf7</i>       | Kruppel-like factor 7 (ubiquitous)                                         | 0006351 // transcription, DNA-templated // inferred from electronic annotation//0006355 // regulation of transcription, DNA-templated // inferred from electronic ann     |
| 0.041949 | 1290.8439           | 733.1305           | NM_007590            | -1.76     | <i>Calm3</i>      | calmodulin 3                                                               | 0000086 // G2/M transition of mitotic cell cycle // inferred from direct assay//0001975 // response to amphetamine // inferred from electronic annotation//0002027 //     |
| 0.038405 | 3275.4446           | 1875.4241          | NM_008306//XM_006525 | -1.75     | <i>Nds1</i>       | N-deacetylase/N-sulfotransferase (heparan glucosaminyl) 1                  | 0000165 // MAPK cascade // inferred from mutant phenotype//0000271 // polysaccharide biosynthetic process // inferred from mutant phenotype//0003279 // cardi             |
| 0.038405 | 1098.0709           | 630.346            | NM_019472//XM_006525 | -1.74     | <i>Myo10</i>      | myosin X                                                                   | 0006810 // transport // inferred from electronic annotation//0007165 // signal transduction // inferred from electronic annotation//0008152 // metabolic process // i     |
| 0.040179 | 483.47977           | 277.98203          | NM_001199113//NM_00_ | -1.74     | <i>Slc29a1</i>    | solute carrier family 29 (nucleoside transporters), member 1               | 0006810 // transport // inferred from electronic annotation//0007595 // lactation // inferred from electronic annotation//0015858 // nucleoside transport // inferred f   |
| 0.04232  | 2567.0747           | 1476.0676          | NM_001159941//NM_02_ | -1.74     | <i>Kctd10</i>     | potassium channel tetramerisation domain containing 10                     | 0016567 // protein ubiquitination // inferred from sequence or structural similarity//0016567 // protein ubiquitination // inferred from electronic annotation//004316:   |
| 0.022647 | 1067.3907           | 614.3084           | NM_025446//XM_006518 | -1.74     | <i>Aig1</i>       | androgen-induced 1                                                         |                                                                                                                                                                           |
| 0.024493 | 157.4052            | 90.6929            | NM_007619//XM_006508 | -1.74     | <i>Cbl</i>        | Casitas B-lineage lymphoma                                                 | 0006468 // protein phosphorylation // inferred from sequence or structural similarity//0007166 // cell surface receptor signaling pathway // inferred from electronic an  |
| 0.028133 | 2361.1665           | 1361.4855          | NM_153423//XM_006538 | -1.73     | <i>Waf2f2</i>     | WAS protein family, member 2                                               | 0001525 // angiogenesis // inferred from mutant phenotype//0001667 // ameoboid-type cell migration // inferred from mutant phenotype//0006897 // endocytosis /            |
| 0.037886 | 259.154             | 149.68216          | NM_001201470//NM_01_ | -1.73     | <i>Paps2</i>      | 3'-phosphoadenosine 5'-phosphosulfate synthase 2                           | 0001003 // sulfate assimilation // inferred from direct assay//0007596 // blood coagulation // inferred from mutant phenotype//0008152 // metabolic process // infer      |
| 0.038405 | 500.5909            | 289.55228          | NM_023755//XM_006525 | -1.73     | <i>Tjfc2l1</i>    | transcription factor CP2-like 1                                            | 000122 // negative regulation of transcription from RNA polymerase II promoter // inferred from direct assay//0009092 // cell morphogenesis // inferred from mutant       |
| 0.038405 | 1474.4878           | 854.76874          | NM_001277928//NM_00_ | -1.73     | <i>Lamb3</i>      | laminin, beta 3                                                            | 0007155 // cell adhesion // inferred from electronic annotation//0035987 // endodermal cell differentiation // inferred from electronic annotation//0050873 // brow       |
| 0.046012 | 123.13911           | 71.58008           | NM_025310            | -1.72     | <i>Ftsj3</i>      | FtsJ homolog 3 (E. coli)                                                   | 0000453 // enzyme-directed rRNA 2'-O-methylation // inferred from electronic annotation//0000463 // maturation of LSU-rRNA from tricistronic rRNA transcript (SSU-r       |
| 0.0486   | 4349.991            | 2534.636           | NM_080555            | -1.72     | <i>Ptp3</i>       | phosphophilip phosphatase 3                                                | 0001568 // blood vessel development // inferred from mutant phenotype//0001702 // gastrulation with mouth forming second // inferred from mutant phenotype//0             |
| 0.024493 | 1178.2483           | 687.4245           | NM_001166584//NM_00_ | -1.71     | <i>Tea1</i>       | TEA domain family member 1                                                 | 0003143 // embryonic heart tube morphogenesis // inferred from genetic interaction//0006351 // transcription, DNA-templated // inferred from electronic annotation,       |
| 0.038405 | 8260.866            | 4822.33            | NM_007929            | -1.71     | <i>Emp2</i>       | epithelial membrane protein 2                                              | 0001765 // membrane raft assembly // inferred from direct assay//0001913 // T cell mediated cytotoxicity // inferred from direct assay//0001952 // regulation of cell-l   |
| 0.038405 | 972.1052            | 571.09314          | NM_001024955//NM_00_ | -1.70     | <i>Plk3r1</i>     | phosphatidylinositol 3-kinase, regulatory subunit, polypeptide 1 (p        | 0001678 // cellular glucose homeostasis // inferred from direct assay//0001934 // positive regulation of protein phosphorylation // not recorded//0001953 // negative     |
| 0.038405 | 2010.098            | 1185.7617          | NM_019760            | -1.70     | <i>Serinc1</i>    | serine incorporator 1                                                      | 0006629 // lipid metabolic process // inferred from electronic annotation//0006658 // phosphatidylserine metabolic process // not recorded//0000665 // sphingolipid       |
| 0.032292 | 5139.1206           | 3044.7122          | NM_009931//XR_378656 | -1.69     | <i>Col1a1</i>     | collagen, type I, alpha 1                                                  | 0001525 // angiogenesis // inferred from electronic annotation//0001569 // patterning of blood vessels // not recorded//0007420 // brain development // not recorde       |
| 0.04034  | 3779.0332           | 2240.2678          | NM_001164036//NM_00_ | -1.69     | <i>Ly6e</i>       | lymphocyte antigen 6 complex, locus E                                      | 0001701 // in utero embryonic development // inferred from mutant phenotype//0003025 // adrenal gland development // inferred from mutant phenotype//0003526              |
| 0.047911 | 231.7017            | 137.50171          | NM_021506//NM_19867  | -1.69     | <i>Sh3f1</i>      | SH3 domain containing ring finger 1                                        | 0006915 // apoptotic process // inferred from electronic annotation//0016567 // protein ubiquitination // inferred from electronic annotation//0043066 // negative re     |
| 0.038405 | 957.0747            | 568.5649           | NM_172530            | -1.68     | <i>She</i>        | src homology 2 domain-containing transforming protein E                    |                                                                                                                                                                           |
| 0.038405 | 390.36908           | 232.65388          | NM_013813//XM_006525 | -1.68     | <i>Epb41b3</i>    | erythrocyte membrane protein band 4.1 like 3                               | 0001558 // regulation of cell growth // inferred from electronic annotation//0002175 // protein localization to paranode region of axon // inferred from mutant phenot    |
| 0.045263 | 1538.4482           | 917.0651           | NM_001163354//NM_01_ | -1.68     | <i>Cytk3</i>      | cytohesin 3                                                                | 0001692 // vesicle-mediated transport // ---//0032012 // regulation of ARF protein signal transduction // inferred from electronic annotation//0043547 // positive reg,   |
| 0.038405 | 2406.5662           | 1434.6732          | NM_001081146//NM_00_ | -1.68     | <i>Prickle2</i>   | prickle homolog 2 (Drosophila)                                             | 0031175 // neuron-projection development // inferred from mutant phenotype//0045197 // establishment or maintenance of epithelial cell apical/basal polarity // infe      |
| 0.038405 | 74.02675            | 44.182262          | NM_053147            | -1.68     | <i>Pcdhb22</i>    | protocadherin beta 22                                                      | 0007155 // cell adhesion // inferred from electronic annotation//0007156 // homophilic cell adhesion via plasma membrane adhesion molecules // inferred from elect        |
| 0.042664 | 919.9881            | 552.4643           | NM_144552//XM_006518 | -1.67     | <i>Sinx6p6</i>    | syntaxin binding protein 6 (amisyn)                                        | 0006887 // exocytosis // not recorded//0006893 // Golgi to plasma membrane transport // not recorded//0016192 // vesicle-mediated transport // inferred from elect        |
| 0.038405 | 5288.5454           | 3176.2969          | NM_009932            | -1.67     | <i>Col2a2</i>     | collagen, type IV, alpha 2                                                 | 0001525 // angiogenesis // inferred from electronic annotation//0006351 // transcription, DNA-templated // inferred from direct assay//00016525 // negative regula        |
| 0.04034  | 94.17975            | 56.642086          | NM_001113246//NM_00_ | -1.66     | <i>Chimerin1</i>  | chimerin 1                                                                 | 0007165 // signal transduction // inferred from electronic annotation//0007399 // nervous system development // inferred from electronic annotation//0008045 // m         |
| 0.038405 | 1183.4149           | 714.85333          | NM_007901            | -1.66     | <i>S1pr1</i>      | sphingosine-1-phosphate receptor 1                                         | 0001525 // angiogenesis // inferred from direct assay//0001955 // blood vessel maturation // inferred from mutant phenotype//0003245 // cardiac muscle tissue gro         |
| 0.026847 | 731.1027            | 441.8175           | NM_153393//XM_011244 | -1.65     | <i>Col23a1</i>    | collagen, type XXIII, alpha 1                                              | 0072027 // protein homotrimerization // not recorded                                                                                                                      |
| 0.03755  | 440.11227           | 267.1456           | NM_001195031//NM_05_ | -1.65     | <i>Pag1</i>       | phosphoprotein associated with glycosphingolipid microdomains 1            | 0002250 // adaptive immune response // inferred from electronic annotation//0002376 // immune system process // inferred from electronic annotation//0035556 //           |
| 0.038405 | 191.66026           | 117.12714          | NM_001286468//NM_02_ | -1.64     | <i>RhoGAP24</i>   | Rho GTPase activating protein 24                                           | 0001525 // angiogenesis // inferred from electronic annotation//0007165 // signal transduction // inferred from electronic annotation//0007275 // multicellular organ     |
| 0.048819 | 831.3               | 510.80463          | NM_001085492//XM_00_ | -1.63     | <i>Rere</i>       | arginine glutamic acid dipeptide (RE) repeats                              | 000122 // negative regulation of transcription from RNA polymerase II promoter // inferred from mutant phenotype//0006338 // chromatin remodeling // inferred fr          |
| 0.024562 | 1328.2279           | 820.05664          | NM_178357            | -1.62     | <i>Klf11</i>      | Kruppel-like factor 11                                                     | 0000083 // regulation of transcription involved in G1/S transition of mitotic cell cycle // not recorded//0000122 // negative regulation of transcription from RNA polyme |
| 0.048611 | 1729.504            | 1073.1603          | NM_009320//XM_006505 | -1.61     | <i>Slc6a6</i>     | solute carrier family 6 (neurotransmitter transporter, tauroine), member 6 | 0001762 // beta-alanine transport // inferred from direct assay//0006810 // transport // inferred from electronic annotation//0006836 // neurotransmitter transport //    |
| 0.041117 | 574.2601            | 363.6274           | NM_010332            | -1.61     | <i>Ednra</i>      | endothelin receptor type A                                                 | 0001569 // patterning of blood vessels // inferred from genetic interaction//0001666 // response to hypoxia // inferred from mutant phenotype//0001701 // in utero e      |
| 0.04568  | 1159.851            | 724.24347          | NM_001136065//NM_00_ | -1.60     | <i>Hpk2</i>       | homeodomain interacting protein kinase 2                                   | 000122 // negative regulation of transcription from RNA polymerase II promoter // inferred from direct assay//0001934 // positive regulation of protein phosphorylat      |
| 0.038405 | 123.47199           | 77.43215           | NM_030556//XM_006498 | -1.59     | <i>Slc19a3</i>    | solute carrier family 19, member 3                                         | 0006810 // transport // inferred from electronic annotation//0015884 // folic acid transport // not recorded//0015888 // thiamine transport // not recorded//004272       |
| 0.0401   | 2224.1606           | 1395.728           | NM_033314//XM_006518 | -1.59     | <i>Slc20a1</i>    | solute carrier organic anion transporter family, member 2a1                | 0006810 // transport // inferred from electronic annotation//0006811 // ion transport // inferred from electronic annotation//0015732 // prostaglandin transport // in    |
| 0.024562 | 208.39694           | 131.20868          | NM_178395//XM_006508 | -1.59     | <i>Zdhc2</i>      | zinc finger, DHHC domain containing 2                                      | 0006612 // protein targeting to membrane // ---//0018230 // peptidyl-L-cysteine S-palmitoylation // ---//0018345 // protein palmitoylation // inferred from direct assa   |
| 0.048728 | 443.21927           | 280.0098           | NM_020510            | -1.58     | <i>Frd2</i>       | frizzled homolog 2 (Drosophila)                                            | 0003149 // membranous septum morphogenesis // inferred from genetic interaction//0003150 // muscular septum morphogenesis // inferred from genetic interaction            |
| 0.038405 | 294.4626            | 186.95341          | NM_008005//NR_102395 | -1.58     | <i>Fgf18</i>      | fibroblast growth factor 18                                                | 0001503 // ossification // inferred from mutant phenotype//0001525 // angiogenesis // inferred from mutant phenotype//0001957 // intramembranous ossification //          |
| 0.038405 | 221.46472           | 140.78758          | NM_001190448//NM_01_ | -1.57     | <i>Ddc</i>        | dopa decarboxylase                                                         | 0006520 // cellular amino acid metabolic process // inferred from electronic annotation//0007623 // circadian rhythm // inferred from electronic annotation//0009636      |
| 0.04789  | 30.130987           | 19.231869          |                      | -1.57     | <i>Igkv15-103</i> | immunoglobulin kappa chain variable 15-103                                 | 0006898 // receptor-mediated endocytosis // ---//0006910 // phagocytosis, recognition // ---//0006911 // phagocytosis, engulfment // ---//0006958 // complement ac        |
| 0.038405 | 136.74263           | 87.35392           | NM_001081349//NM_00_ | -1.57     | <i>Slc43a1</i>    | solute carrier family 43, member 1                                         | 0006810 // transport // inferred from electronic annotation//0006865 // amino acid transport // inferred from electronic annotation//0015804 // neutral amino acid tr     |
| 0.048728 | 1049.4797           | 674.76886          | NM_001098799//XM_00_ | -1.56     | <i>Tox2</i>       | TOX high mobility group box family member 2                                | 0006338 // chromatin remodeling // not recorded//0006355 // regulation of transcription, DNA-templated // not recorded//0045944 // positive regulation of transcrip       |
| 0.038405 | 678.3445            | 436.1575           | NM_198023//XM_006518 | -1.56     | <i>Rcor1</i>      | REST corepressor 1                                                         | 000122 // negative regulation of transcription from RNA polymerase II promoter // not recorded//0006351 // transcription, DNA-templated // inferred from electronic       |
| 0.038405 | 329.11517           | 213.00853          | NM_015755//XM_011244 | -1.55     | <i>Hunk</i>       | horizontally upregulated Neu-associated kinase                             | 0006468 // protein phosphorylation // inferred from direct assay//00016310 // phosphorylation // inferred from electronic annotation//0035556 // intracellular signal t   |
| 0.040179 | 799.8799            | 521.3591           | NM_183186//XM_006518 | -1.53     | <i>Foxn3</i>      | forkhead box protein 3                                                     | 0006351 // transcription, DNA-templated // inferred from electronic annotation//0006355 // regulation of transcription, DNA-templated // inferred from electronic ann     |
| 0.041134 | 2590.2878           | 1688.9473          | NM_001080774//NM_00_ | -1.53     | <i>Myo1c</i>      | myosin IC                                                                  | 0006605 // protein targeting // not recorded//0006612 // protein targeting to membrane // not recorded//0006810 // transport // inferred from direct assay//00081:        |
| 0.038405 | 2260.475            | 1475.6559          | NM_001170341//NM_14_ | -1.53     | <i>Mjfl2</i>      | myeloid leukemia factor 2                                                  | 0006952 // defense response // not recorded                                                                                                                               |
| 0.041209 | 148.01059           | 96.73844           | NM_020505//NM_14613  | -1.53     | <i>Vav3</i>       | vav 3 oncogene                                                             | 0001525 // angiogenesis // inferred from electronic annotation//0006906 // vesicle fusion // inferred from genetic interaction//0006974 // cellular response to DNA d     |
| 0.042664 | 3332.377            | 2182.652           | NM_139149//XM_006507 | -1.53     | <i>Fuz1</i>       | fused in sarcoma                                                           | 0007127 // cellular response to calcium ion // not recorded//1903506 // regulation of nucleic acid-templated transcription // inferred from electronic annotation         |
| 0.04941  | 314.04416           | 205.67297          | NM_027265//NM_13443  | -1.53     | <i>Il17rd</i>     | interleukin 17 receptor D                                                  | 0019221 // cytokine-mediated signaling pathway // not recorded                                                                                                            |
| 0.038405 | 1085.1791           | 712.9826           | NM_001304757//NM_00_ | -1.52     | <i>Col13a1</i>    | collagen, type XIII, alpha 1                                               | 0001503 // ossification // inferred from electronic annotation//0001763 // morphogenesis of a branching structure // inferred from expression pattern//0001958 // en      |
| 0.038405 | 716.9844            | 471.4302           | NM_001271584//NM_00_ | -1.52     | <i>Dnaic5</i>     | Dnal (Hsp40) homolog, subfamily C, member 5                                | 0043524 // negative regulation of neuron apoptotic process // inferred from genetic interaction                                                                           |
| 0.048728 | 461.2156            | 304.12143          | NM_177839//XM_006498 | -1.52     | <i>Tnn</i>        | tenascin N                                                                 | 0007160 // cell-matrix adhesion // inferred from direct assay//0007409 // axonogenesis // inferred from direct assay//0016049 // cell growth // inferred from direct as   |
| 0.038405 | 522.45447           | 344.89117          | NM_008029            | -1.51     | <i>Fit4</i>       | FMS-like tyrosine kinase 4                                                 | 0001525 // angiogenesis // inferred from electronic annotation//0001934 // positive regulation of protein phosphorylation // not recorded//0001938 // positive regula     |
| 0.038405 | 366.60474           | 242.18045          | NM_001042779//NM_00_ | -1.51     | <i>Sema3b</i>     | sema domain, immunoglobulin domain (Ig), short basic domain, semaphorin 3B | 0001755 // neural crest cell migration // not recorded//0007275 // multicellular organismal development // inferred from electronic annotation//0007399 // nervous s      |
| 0.041704 | 192.55879           | 127.45899          | NM_001081420//XM_01_ | -1.51     | <i>Fam206a</i>    | family with sequence similarity 206, member A                              |                                                                                                                                                                           |
| 0.024562 | 32.793064           | 21.708841          | NM_001301370//NM_18_ | -1.51     | <i>Syt14</i>      | synaptotagmin XIV                                                          | 0006906 // vesicle fusion // ---//0016079 // synaptic vesicle exocytosis // not recorded//0017158 // regulation of calcium ion-dependent exocytosis // ---//0048791 //    |

| p [Corr] | [C3H/HeN, P56][raw] | [Gsr-KO, P56][raw] | RefSeq Transcript ID      | FD @PND56 | Gene Symbol             | Gene Title                                                             | Gene Ontology Biological Process                                                                                                                                               |
|----------|---------------------|--------------------|---------------------------|-----------|-------------------------|------------------------------------------------------------------------|--------------------------------------------------------------------------------------------------------------------------------------------------------------------------------|
| 0.032292 | 165.37949           | 109.610146         | NM_001163154//NM_00_1-51  |           | <b>Etv1</b>             | ets variant 1                                                          | 0006351 // transcription, DNA-templated // inferred from electronic annotation // 0006355 // regulation of transcription, DNA-templated // inferred from electronic annotation |
| 0.038405 | 877.2441            | 582.276            | NM_001081098//NM_011-151  |           | <b>Zfp362</b>           | zinc finger protein 362                                                | 0007264 // small GTPase mediated signal transduction // inferred from electronic annotation // 0015031 // protein transport // inferred from electronic annotation // 001000   |
| 0.04941  | 1159.0638           | 769.6117           | NM_001040459//NM_00_1-51  |           | <b>Shroom4</b>          | shroom family member 4                                                 | 0000902 // cell morphogenesis // inferred from sequence or structural similarity // 0007015 // actin filament organization // inferred from direct assay // 0007275 // mu      |
| 0.038405 | 855.61957           | 568.6709           | NM_1133685                | -1.50     | <b>Rab31</b>            | RAB31, member RAS oncogene family                                      | 0007264 // small GTPase mediated signal transduction // inferred from electronic annotation // 0015031 // protein transport // inferred from electronic annotation // 001000   |
| 0.043007 | 3468.1067           | 2307.2063          | NM_001276481//NM_00_1-50  |           | <b>Dag1</b>             | dyagroglycan 1                                                         | 0002011 // morphogenesis of an epithelial sheet // inferred from mutant phenotype // 0006509 // membrane protein ectodomain proteolysis // not recorded // 000660              |
| 0.04941  | 1402.9282           | 935.90622          | NM_0052994//NM_006514-150 |           | <b>Spack2</b>           | sparc/osteonectin, cwcv and kazal-like domains proteoglycan 2          | 0007165 // signal transduction // inferred from electronic annotation // 0010811 // positive regulation of cell-substrate adhesion // inferred from direct assay // 0001980C   |
| 0.040434 | 562.2537            | 375.09845          | NM_023785                 | -1.50     | <b>Pppb</b>             | pro-platelet basic protein                                             | 0002523 // leukocyte migration involved in inflammatory response // inferred from mutant phenotype // 0002690 // positive regulation of leukocyte chemotaxis // not r          |
| 0.049711 | 1739.3824           | 1163.3354          | NM_0111239                | -1.50     | <b>Ranbp1</b>           | RAN binding protein 1                                                  | 0007051 // spindle organization // inferred from direct assay // 0010976 // positive regulation of neuron projection development // not recorded // 00035690 // cellular n     |
| 0.040698 | 178.26881           | 119.235756         | NM_001135657//NM_00_1-50  |           | <b>Ptpri1//Gm38718/</b> | protein tyrosine phosphatase, receptor type, 1 // predicted gene, 3    | 0001570 // vasculogenesis // inferred from mutant phenotype // 0001954 // positive regulation of cell-matrix adhesion // inferred from direct assay // 0006470 // protei       |
| 0.041949 | 432.15854           | 289.1162           | NM_199299//NM_006534-149  |           | <b>Jade2</b>            | jade family PHD finger 2                                               | 0043966 // histone H3 acetylation // not recorded // 0043981 // histone H4-K4 acetylation // not recorded // 0043982 // histone H4-K8 acetylation // not recorded // 004       |
| 0.028116 | 276.0881            | 184.87575          | NM_001080813//NM_02_1-49  |           | <b>Rab11fp1</b>         | RAB11 family interacting protein 1 (class I)                           | 0006810 // transport // inferred from electronic annotation // 0015031 // protein transport // inferred from electronic annotation // 0045055 // regulated secretory pat       |
| 0.046461 | 272.19382           | 182.57698          | NM_139294//NM_006505-149  |           | <b>Braf</b>             | Braf transforming gene                                                 | 0000165 // MAPK cascade // not recorded // 0000186 // activation of MAPKK activity // not recorded // 00002318 // myeloid progenitor cell differentiation // inferred fr       |
| 0.047179 | 892.29755           | 599.9184           | NM_010415                 | -1.49     | <b>Hbecf</b>            | heparin-binding EGF-like growth factor                                 | 0001525 // angiogenesis // non-traceable author statement // 0001832 // blastocyst growth // traceable author statement // 0007173 // epidermal growth factor recept           |
| 0.038405 | 1397.2965           | 939.61255          | NM_001024624              | -1.49     | <b>Cdk15</b>            | cyclin-dependent kinase-like 5                                         | 0001764 // neuron migration // not recorded // 0006468 // protein phosphorylation // inferred from electronic annotation // 0016310 // phosphorylation // inferred fr          |
| 0.038405 | 340.83203           | 229.91806          | NM_001003671//NM_00_1-48  |           | <b>Pcdha11//Pcdha10</b> | protocadherin alpha 11 // protocadherin alpha 10 // protocadherin      | 0007155 // cell adhesion // inferred from electronic annotation // 0007155 // cell adhesion // traceable author statement // 0007156 // homophilic cell adhesion via plas      |
| 0.04941  | 3203.1              | 2173.2795          | NM_001029836//NM_00_1-47  |           | <b>Npnt</b>             | nephronectin                                                           | 0001657 // ureteric bud development // inferred from mutant phenotype // 0001658 // branching involved in ureteric bud morphogenesis // inferred from mutant phen              |
| 0.04941  | 3227.47             | 2193.964           | NM_001025600//NM_00_1-47  |           | <b>Cadm1</b>            | cell adhesion molecule 1                                               | 0001889 // liver development // not recorded // 0002376 // immune system process // inferred from electronic annotation // 0006915 // apoptotic process // inferred fr         |
| 0.038405 | 261.20563           | 177.58998          | NM_001003671//NM_00_1-47  |           | <b>Pcdha11//Pcdha10</b> | protocadherin alpha 11 // protocadherin alpha 10 // protocadherin      | 0007155 // cell adhesion // inferred from electronic annotation // 0007155 // cell adhesion // traceable author statement // 0007156 // homophilic cell adhesion via plas      |
| 0.048728 | 2347.2542           | 1598.9901          | NM_172145//NM_006505-147  |           | <b>Evai1b</b>           | eva-1 homolog B (C. elegans)                                           | 0098779 // mitophagy in response to mitochondrial depolarization // not recorded                                                                                               |
| 0.043007 | 1352.7505           | 922.9179           | NM_007478//NM_011242-147  |           | <b>Arf3</b>             | ADP-ribosylation factor 3                                              | 0006810 // transport // inferred from electronic annotation // 0007264 // small GTPase mediated signal transduction // inferred from electronic annotation // 0015031 /        |
| 0.041704 | 83.124756           | 56.806545          | NM_013475//NM_006534-146  |           | <b>Apj</b>              | apolipoprotein H                                                       | 0001937 // negative regulation of endothelial cell proliferation // not recorded // 0006641 // triglyceride metabolic process // not recorded // 0007596 // blood coagulat     |
| 0.043007 | 75.47448            | 51.586594          | NM_013848//NM_006505-146  |           | <b>Ermapp</b>           | erythroblast membrane-associated protein                               |                                                                                                                                                                                |
| 0.041117 | 497.23718           | 339.93472          | NM_001005740//NM_00_1-46  |           | <b>Phactr1//Chst11</b>  | phosphatase and actin regulator 1 // carboxypeptidase sulfotransferase | 0031032 // actomyosin structure organization // inferred from mutant phenotype // 0031032 // actomyosin structure organization // not recorded // 0031532 // actin cy          |
| 0.04941  | 1123.7413           | 768.2795           | NM_001038625//NM_02_1-46  |           | <b>Srtad2</b>           | SERTA domain containing 2                                              | 0006351 // transcription, DNA-templated // inferred from electronic annotation // 0006355 // regulation of transcription, DNA-templated // inferred from electronic ann        |
| 0.04941  | 936.5158            | 604.2987           | NM_001313977//NM_00_1-46  |           | <b>Pekc</b>             | protein kinase C, eta                                                  | 0006468 // protein phosphorylation // not recorded // 0010744 // positive regulation of macrophage derived foam cell differentiation // inferred from mutant phenotyp          |
| 0.04356  | 447.06488           | 305.67294          | NM_178608                 | -1.46     | <b>Reep1</b>            | receptor accessory protein 1                                           | 0032386 // regulation of intracellular transport // inferred from direct assay // 0051205 // protein insertion into membrane // not recorded // 0071786 // endoplasmic re      |
| 0.038405 | 3695.5808           | 2528.6582          | NM_001001183//NM_00_1-46  |           | <b>Tram204</b>          | transmembrane protein 204                                              | 0001945 // lymph vessel development // inferred from genetic interaction // 0001945 // lymph vessel development // inferred from mutant phenotype // 00030947 // req           |
| 0.04232  | 7164.845            | 4905.9795          | NM_032398//NM_011242-146  |           | <b>Plvap</b>            | plasmaless vesicle associated protein 2                                | 0000165 // MAPK cascade // not recorded // 0002693 // positive regulation of cellular extravasation // inferred from mutant phenotype // 0002693 // positive regulati          |
| 0.04232  | 476.4661            | 326.4861           | NM_025729//NM_006521-146  |           | <b>Tab3</b>             | TGF-beta activated kinase 1/MAP3K7 binding protein 3                   | 0016310 // phosphorylation // inferred from electronic annotation                                                                                                              |
| 0.049219 | 209.23053           | 143.5325           | NM_001290489//NM_02_1-46  |           | <b>Med27</b>            | mediator complex subunit 27                                            | 0006351 // transcription, DNA-templated // inferred from electronic annotation // 0006355 // regulation of transcription, DNA-templated // inferred from electronic ann        |
| 0.049219 | 1171.1486           | 804.0398           | NM_010228//NM_006504-146  |           | <b>Fit1</b>             | FMS-like tyrosine kinase 1                                             | 0001525 // angiogenesis // inferred from mutant phenotype // 0001525 // angiogenesis // traceable author statement // 0001569 // patterning of blood vessels // infern         |
| 0.038405 | 257.90628           | 177.10294          | NM_033622//NM_006504-146  |           | <b>Tnfr1f3b</b>         | tumor necrosis factor (ligand) superfamily, member 13b                 | 0001782 // B cell homeostasis // inferred from mutant phenotype // 0002636 // positive regulation of germinal center formation // inferred from mutant phenotype // 0          |
| 0.04941  | 2174.0627           | 1493.8977          | NM_011202//NM_20124-146   |           | <b>Mrip1</b>            | myosin phosphatase Rho interacting protein                             | 0001934 // positive regulation of protein phosphorylation // not recorded // 0032507 // maintenance of protein location in cell // not recorded // 0035509 // negative re      |
| 0.049545 | 2060.2314           | 1416.2219          | NM_175341//NM_20751-145   |           | <b>Mbnl2</b>            | muscleblind-like 2                                                     | 000381 // regulation of alternative mRNA splicing, via spliceosome // inferred from mutant phenotype // 0000381 // regulation of alternative mRNA splicing, via splicee        |
| 0.038405 | 949.74506           | 654.44745          | NM_018884//NM_006504-145  |           | <b>Pdm3</b>             | PDZ domain containing RING finger 3                                    | 0007528 // neuromuscular junction development // inferred from mutant phenotype // 0016567 // protein ubiquitination // inferred from direct assay                             |
| 0.043007 | 301.5806            | 208.10634          | NM_001163505//NM_14_1-45  |           | <b>Ait3</b>             | atastin GTPase 3                                                       | 0007029 // endoplasmic reticulum organization // not recorded // 0007030 // Golgi organization // not recorded // 0008152 // metabolic process // inferred from electr         |
| 0.04201  | 452.33777           | 312.7535           | NM_024286//NM_006514-145  |           | <b>Popdc3</b>           | popye domain containing 3                                              | 0042391 // regulation of membrane potential // inferred from genetic interaction                                                                                               |
| 0.041117 | 4692.4355           | 3246.059           | NM_001289895//NM_02_1-45  |           | <b>Tns1</b>             | tensin 1                                                               | 0007044 // cell-substrate junction assembly // inferred from mutant phenotype // 0010761 // fibroblast migration // inferred from mutant phenotype // 0035556 // intra         |
| 0.038405 | 219.95209           | 152.24667          | NM_022980                 | -1.44     | <b>Rcan3</b>            | regulator of calcineurin 3                                             | 0019722 // calcium-mediated signaling // inferred from electronic annotation // 0050790 // regulation of catalytic activity // -- // 0070884 // regulation of calcineurin-NF   |
| 0.04232  | 344.3199            | 238.81123          | NM_183106//NM_006504-144  |           | <b>Tct17</b>            | retrotransposon repeat domain 17                                       | 0030030 // cell projection organization // inferred from electronic annotation // 0030041 // actin filament polymerization // not recorded // 0044782 // cilium organizati     |
| 0.044532 | 344.19833           | 239.34137          | NM_010731//NM_006514-144  |           | <b>Zbtb7a</b>           | zinc finger and BTB domain containing 7a                               | 0000122 // negative regulation of transcription from RNA polymerase II promoter // inferred from direct assay // 0006351 // transcription, DNA-templated // inferred fr        |
| 0.04789  | 535.3437            | 372.38577          | NM_0010037136//NM_17_1-44 |           | <b>Argap1</b>           | ARF-GAP with GTPase domain, ankyrin repeat and PH domain 1             | 0006810 // transport // inferred from electronic annotation // 0007165 // signal transduction // inferred from electronic annotation // 0007264 // small GTPase mediat         |
| 0.049568 | 421.48666           | 293.28323          | NM_001145830//NM_01_1-44  |           | <b>Pfcb1</b>            | phospholipase C, beta 1                                                | 0000086 // G2/M transition of mitotic cell cycle // inferred from direct assay // 0000086 // G2/M transition of mitotic cell cycle // non-traceable author statement // 000    |
| 0.038405 | 243.71495           | 169.61202          | NM_001043355//NM_00_1-44  |           | <b>Map6</b>             | microtubule-associated protein 6                                       | 0000226 // microtubule cytoskeleton organization // inferred from electronic annotation // 0006810 // transport // inferred from electronic annotation // 00032418 // lysi     |
| 0.048728 | 1404.8986           | 977.93884          | NM_145130//NM_006505-144  |           | <b>Lncp3</b>            | lysophosphatidylcholine acyltransferase 3                              | 0006629 // lipid metabolic process // inferred from electronic annotation // 0006644 // phospholipid metabolic process // inferred from electronic annotation // 000865-       |
| 0.047646 | 571.37335           | 444.2544           | NM_025664                 | -1.44     | <b>Sxpr1</b>            | sorting nexin 9                                                        | 000281 // mitotic cytokinesis // not recorded // 0006810 // transport // inferred from electronic annotation // 0006886 // intracellular protein transport // inferred fr      |
| 0.038405 | 1207.6235           | 841.2943           | NM_001285805//NM_01_1-44  |           | <b>Zbtb20</b>           | zinc finger and BTB domain containing 20                               | 0000122 // negative regulation of transcription from RNA polymerase II promoter // inferred from mutant phenotype // 0006351 // transcription, DNA-templated // infe           |
| 0.04941  | 3716.0823           | 2591.874           | NM_009128                 | -1.43     | <b>Sdc2</b>             | stearyl-Coenzyme A desaturase 2                                        | 0006629 // lipid metabolic process // inferred from electronic annotation // 0006631 // fatty acid metabolic process // inferred from electronic annotation // 00006633 //     |
| 0.038405 | 927.2107            | 646.7869           | NM_147219//NM_006534-143  |           | <b>Abc5a</b>            | ATP-binding cassette, sub-family A (ABC1), member 5                    | 0006810 // transport // inferred from electronic annotation // 0008152 // metabolic process // inferred from electronic annotation // 0010745 // negative regulation of r      |
| 0.048611 | 348.89117           | 243.37679          | NM_021439//NM_006514-143  |           | <b>Phactr1//Phactr1</b> | carbohydrate sulfotransferase 11 // phosphatase and actin regulat      | 0002063 // chondrocyte development // inferred from mutant phenotype // 0005975 // carbohydrate metabolic process // inferred from electronic annotation // 00075              |
| 0.04232  | 659.69305           | 461.06625          | NM_198631//NM_006544-143  |           | <b>Zc3h4</b>            | zinc finger CCHC-type containing 4                                     |                                                                                                                                                                                |
| 0.042435 | 1120.1317           | 783.55286          | NM_001204915//NM_17_1-43  |           | <b>Reep3</b>            | receptor accessory protein 3                                           | 0006998 // nuclear envelope organization // not recorded // 0007049 // cell cycle // inferred from electronic annotation // 0007067 // mitotic nuclear division // inferred    |
| 0.040179 | 701.4039            | 490.79355          | NM_001081016//NM_01_1-43  |           | <b>Zc3h7b</b>           | zinc finger CCHC type containing 7b                                    |                                                                                                                                                                                |
| 0.038405 | 525.3361            | 368.1724           | NM_001081750              | -1.43     | <b>Zfp664</b>           | zinc finger protein 664                                                | 0006351 // transcription, DNA-templated // inferred from electronic annotation // 0006355 // regulation of transcription, DNA-templated // not recorded                        |
| 0.04941  | 1364.7068           | 957.38416          | NM_010590                 | -1.43     | <b>Ajuab</b>            | ajuba LIM protein                                                      | 0000122 // negative regulation of transcription from RNA polymerase II promoter // inferred from mutant phenotype // 0001666 // response to hypoxia // not recorded,           |
| 0.048728 | 344.255             | 242.27428          | NM_001276461//NM_00_1-42  |           | <b>Asp1</b>             | ARF-GAP with SH3 domain, ankyrin repeat and PH domain1                 | 0030030 // cell projection organization // inferred from electronic annotation // 0043547 // positive regulation of GTPase activity // inferred from electronic annotation/    |
| 0.049864 | 189.51044           | 133.46808          | NM_026186                 | -1.42     | <b>Cwc25</b>            | CWC25 spliceosome-associated protein homolog (S. cerevisiae)           |                                                                                                                                                                                |
| 0.047853 | 1317.6952           | 928.29004          | NM_028763                 | -1.42     | <b>Cbx6</b>             | chromobox 6                                                            | 0000122 // negative regulation of transcription from RNA polymerase II promoter // not recorded // 0006351 // transcription, DNA-templated // inferred from electronic         |
| 0.044232 | 473.55157           | 333.81567          | NM_001311112//NM_17_1-42  |           | <b>Ccd126</b>           | coiled-coil domain containing 126                                      | 0006487 // protein N-linked glycosylation // inferred from electronic annotation                                                                                               |
| 0.04789  | 2008.2811           | 1417.9764          | NM_175414//NM_006505-142  |           | <b>Tspan9</b>           | tetraspanin 9                                                          | 0007166 // cell surface receptor signaling pathway // not recorded                                                                                                             |
| 0.048728 | 304.9978            | 215.579            | NM_009199                 | -1.41     | <b>Sic1a</b>            | solute carrier family 1 (neuronal/epithelial high affinity glutamate t | 0006810 // transport // inferred from electronic annotation // 0006835 // dicarboxylic acid transport // inferred from electronic annotation // 0010460 // positive regulat    |
| 0.048728 | 292.65384           | 207.17819          | NM_176958                 | -1.41     | <b>Hif1a</b>            | hypoxia-inducible factor 1, alpha subunit inhibitor                    | 0006351 // transcription, DNA-templated // inferred from electronic annotation // 0006355 // regulation of transcription, DNA-templated // inferred from electronic ann        |
| 0.04941  | 192.37997           | 136.22414          | NM_029037                 | -1.41     | <b>Ponk</b>             | protein-O-mannose kinase                                               | 0001764 // neuron migration // inferred from mutant phenotype // 0006468 // protein phosphorylation // inferred from electronic annotation // 0006493 // protein O-li          |
| 0.041117 | 331.8189            | 235.22113          | NM_021528//NM_006504-141  |           | <b>Chst12</b>           | carbohydrate sulfotransferase 12                                       | 0005975 // carbohydrate metabolic process // inferred from electronic annotation // 0016051 // carbohydrate biosynthesis process // inferred from electronic annotatio         |
| 0.049864 | 254.88866           | 180.70114          | NM_201519//NM_006514-141  |           | <b>Map4k5</b>           | mitogen-activated protein kinase kinase kinase 5                       | 0000165 // MAPK cascade // not recorded // 0000185 // activation of MAPKK activity // -- // 0000185 // activation of MAPKK activity // inferred from electronic annota         |
| 0.04941  | 213.7468            | 151.6481           | NM_013818//NM_006524-141  |           | <b>Gtpbp1</b>           | GTP binding protein 1                                                  | 0006413 // translational initiation // -- // 0008152 // metabolic process // inferred from electronic annotation // 0006104 // positive regulation of mRNA catabolic proce     |
| 0.044232 | 519.01294           | 368.33963          | NM_008881                 | -1.41     | <b>Plexn1</b>           | plexin A1                                                              | 0007165 // signal transduction // inferred from electronic annotation // 0014910 // regulation of smooth muscle cell migration // inferred from mutant phenotype // 000        |
| 0.04941  | 4282.401            | 3046.8162          | NM_172621//NM_006524-141  |           | <b>Clic5</b>            | chloride intracellular channel 5                                       | 0002021 // response to dietary excess // inferred from mutant phenotype // 0002024 // diet induced thermogenesis // inferred from mutant phenotype // 0006749 // gl            |
| 0.04232  | 505.34937           | 360.12274          | NM_001003955//NM_17_1-40  |           | <b>Rab11fp5</b>         | RAB11 family interacting protein 5 (class I)                           | 0006810 // transport // inferred from electronic annotation // 0015031 // protein transport // inferred from electronic annotation // 0035773 // insulin secretion involv      |
| 0.0401   | 513.92395           | 366.2639           | NM_001003529//NM_00_1-40  |           | <b>Tulp4</b>            | tubby like protein 4                                                   | 0016567 // protein ubiquitination // inferred from electronic annotation // 0035556 // intracellular signal transduction // inferred from electronic annotation // 0061512     |
| 0.038405 | 384.71835           | 275.97717          | NM_001001883//NM_17_1-39  |           | <b>Hecw2</b>            | HECT, C2 and WW domain containing E3 ubiquitin protein ligase 2        | 0016567 // protein ubiquitination // not recorded // 0042787 // protein ubiquitination involved in ubiquitin-dependent protein catabolic process // --                         |
| 0.048728 | 879.9232            | 632.8017           | NM_183016//NM_006514-139  |           | <b>Cdc42bbp</b>         | CDC42 binding protein kinase beta                                      | 0006468 // protein phosphorylation // not recorded // 0016310 // phosphorylation // inferred from electronic annotation // 0016477 // cell migration // not recorded //        |
| 0.04941  | 1067.7323           | 769.5822           | NM_181415//NM_006524-139  |           | <b>Attractin1</b>       | attractin like 1                                                       | 0007186 // G-protein coupled receptor signaling pathway // inferred from physical interaction                                                                                  |
| 0.044568 | 254.41515           | 183.1787           | NM_177409                 | -1.38     | <b>Tram2</b>            | translocating chain-associated membrane protein 2                      | 0006810 // transport // inferred from electronic annotation // 0015031 // protein transport // inferred from electronic annotation // 0032964 // collagen biosynthetic pri     |
| 0.041117 | 238.1474            | 172.13155          | NM_030256//NM_006514-138  |           | <b>C9orf2</b>           | B cell CLL/lymphoma 9-like                                             | 0006351 // transcription, DNA-templated // inferred from electronic annotation // 0006355 // regulation of transcription, DNA-templated // inferred from electronic ann        |
| 0.04941  | 83.60875            | 60.45419           | NM_019732//NM_006534-138  |           | <b>Rum3</b>             | runf related transcription factor 3                                    | 0000122 // negative regulation of transcription from RNA polymerase II promoter // inferred from direct assay // 0001503 // ossification // not recorded // 0002062 // ct      |
| 0.0486   | 919.9784            | 665.8952           | NM_026301//NM_006524-138  |           | <b>Rif125</b>           | runt finger protein 125                                                | 0002250 // adaptive immune response // inferred from electronic annotation // 0002376 // immune system process // inferred from electronic annotation // 0016567 //            |
| 0.041704 | 266.5603            | 193.26584          | NM_029397//NM_170594-138  |           | <b>Rbm12</b>            | RNA binding motif protein 12                                           | 0006351 // transcription, DNA-templated // inferred from electronic annotation // 0006355 // regulation of transcription, DNA-templated // inferred from electronic ann        |
| 0.049711 |                     |                    |                           |           |                         |                                                                        |                                                                                                                                                                                |

| p [Corr] | [C3H/HeN, P56][raw] | [Gsr-KO, P56][raw] | RefSeq Transcript ID       | FD @PND56 | Gene Symbol            | Gene Title                                                                                                                                            | Gene Ontology Biological Process                                                                                                                                        |
|----------|---------------------|--------------------|----------------------------|-----------|------------------------|-------------------------------------------------------------------------------------------------------------------------------------------------------|-------------------------------------------------------------------------------------------------------------------------------------------------------------------------|
| 0.04941  | 506.8478            | 368.49817          | NM_001253890//NM_001-1.38  |           | <b>Prkar1b</b>         | protein kinase, cAMP dependent regulatory, type I beta                                                                                                | 0001932 // regulation of protein phosphorylation // inferred from electronic annotation//0006468 // protein phosphorylation // traceable author statement//0007611      |
| 0.048728 | 309.95627           | 226.64578          | NM_001039079//NM_001-1.37  |           | <b>Prkcz</b>           | protein kinase C, zeta                                                                                                                                | 0000226 // microtubule cytoskeleton organization // inferred from genetic interaction//0000226 // microtubule cytoskeleton organization // inferred from mutant ph      |
| 0.045259 | 318.1437            | 233.03137          | NM_001146687//NM_001-1.37  |           | <b>Pip5k1c</b>         | phosphatidylinositol-4-phosphate 5-kinase, type 1 gamma                                                                                               | 0006887 // exocytosis // inferred from electronic annotation//0006897 // endocytosis // inferred from electronic annotation//0006909 // phagocytosis // inferred from   |
| 0.04941  | 147.24838           | 100.05353          | NM_001040026//XM_000-1.36  |           | <b>Sco1</b>            | SCO cytochrome oxidase deficient homologue 1 (yeast)                                                                                                  | 0006825 // copper ion transport // inferred from electronic annotation//0006878 // cellular copper ion homeostasis // inferred from electronic annotation//0008535 /    |
| 0.04941  | 259.1912            | 190.93745          | NM_053273                  | -1.36     | <b>Ttyh2</b>           | twenty homolog 2 (Drosophila)                                                                                                                         | 0006810 // transport // inferred from electronic annotation//0006811 // ion transport // inferred from electronic annotation//0006821 // chloride transport // inferre  |
| 0.04941  | 391.65328           | 289.13334          | NM_029770//XM_006511-1.35  |           | <b>Unc5b</b>           | unc-5 homolog B (C. elegans)                                                                                                                          | 0001525 // angiogenesis // inferred from electronic annotation//0006915 // apoptotic process // inferred from electronic annotation//0007165 // signal transduction /   |
| 0.04232  | 249.01794           | 184.08096          | NM_001114361//NM_001-1.35  |           | <b>Emil4</b>           | echinoderm microtubule associated protein like 4                                                                                                      | 0007026 // negative regulation of microtubule depolymerization // inferred from mutant phenotype                                                                        |
| 0.044264 | 200.35493           | 148.59875          | NM_033509//XM_006491-1.35  |           | <b>Vangl2</b>          | vang-like 2 (van gogh, Drosophila)                                                                                                                    | 0001569 // patterning of blood vessels // traceable author statement//0001736 // establishment of planar polarity // inferred from genetic interaction//0001736 // est  |
| 0.038405 | 97.365265           | 72.2618            | NM_025519                  | -1.35     | <b>Chmp4c</b>          | charged multivesicular body protein 4C                                                                                                                | 0000920 // cell separation after cytokinesis // not recorded//0006810 // transport // inferred from electronic annotation//0006997 // nucleus organization // not reco  |
| 0.038405 | 128.85724           | 95.66023           | NM_145700//XM_006511-1.35  |           | <b>Ackr4</b>           | atypical chemokine receptor 4                                                                                                                         | 0006898 // receptor-mediated endocytosis // inferred from electronic annotation//0006935 // chemotaxis // inferred from electronic annotation//0007165 // signal tr     |
| 0.049303 | 134.66531           | 100.621735         | NM_178793//XM_006524-1.34  |           | <b>Ccbe1</b>           | collagen and calcium binding EGF domains 1                                                                                                            | 0001525 // angiogenesis // inferred from electronic annotation//0001946 // lymphangiogenesis // inferred from mutant phenotype//0001946 // lymphangiogenesis //         |
| 0.04941  | 353.18076           | 264.94797          | NM_001042623//NM_001-1.33  |           | <b>Phc1</b>            | polyhomeotic-like 1 (Drosophila)                                                                                                                      | 0007275 // multicellular organismal development // inferred from electronic annotation//0016574 // histone ubiquitination // not recorded//0071300 // cellular respo    |
| 0.045259 | 36.328278           | 27.450245          | NM_013596//XR_385979-1.32  |           | <b>Mcsr</b>            | melanocortin 5 receptor                                                                                                                               | 0007165 // signal transduction // inferred from electronic annotation//0007186 // G-protein coupled receptor signaling pathway // inferred from electronic annotation,  |
| 0.04941  | 57.860466           | 44.106277          | NM_008730                  | -1.31     | <b>Nptx1</b>           | neuronal pentraxin 1                                                                                                                                  | 0006839 // mitochondrial transport // not recorded//0035865 // cellular response to potassium ion // not recorded//0043653 // mitochondrial fragmentation involv        |
| 0.041949 | 163.54807           | 124.994736         | NM_175022                  | -1.31     | <b>Prr12</b>           | proline rich 12                                                                                                                                       |                                                                                                                                                                         |
| 0.04941  | 324.36267           | 248.02576          | NM_001081149//XM_000-1.31  |           | <b>Kat6a</b>           | K[lysine] acetyltransferase 6A                                                                                                                        | 0003007 // heart morphogenesis // inferred from genetic interaction//0003007 // heart morphogenesis // inferred from mutant phenotype//0006334 // nucleosome            |
| 0.049864 | 367.79852           | 281.6287           | NM_001256104//NM_14-1.31   |           | <b>Slc10a3</b>         | solute carrier family 10 (sodium/bile acid cotransporter family), member 3                                                                            | 0006810 // transport // inferred from electronic annotation//0010033 // response to organic substance // inferred from direct assay//0015721 // bile acid and bile salt |
| 0.04941  | 161.53345           | 127.06176          | NM_001038607//NM_001-1.27  |           | <b>Kcnh1</b>           | potassium voltage-gated channel, subfamily H (eag-related), member 1                                                                                  | 0000160 // phosphorelay signal transduction system // inferred from electronic annotation//0001964 // startle response // not recorded//0006810 // transport // infe    |
| 0.049219 | 562.8476            | 735.7147           | NM_182805                  | 1.31      | <b>Gp95t</b>           | glutamic pyruvic transaminase, soluble                                                                                                                | 0009058 // biosynthetic process // inferred from electronic annotation//0042853 // L-alanine catabolic process // inferred from electronic annotation                   |
| 0.049864 | 691.3509            | 924.1627           | NM_0011155//XM_006538-1.34 |           | <b>Ppp5c</b>           | protein phosphatase 5, catalytic subunit                                                                                                              | 0001933 // negative regulation of protein phosphorylation // not recorded//0006470 // protein dephosphorylation // not recorded//0007165 // signal transduction //      |
| 0.048728 | 1232.7087           | 1668.4021          | NM_028281//XM_006511-1.35  |           | <b>Pcb2d</b>           | pterin 4 alpha carbinolamine dehydratase/dimerization cofactor of                                                                                     | 0006729 // tetrahydrobiopterin biosynthetic process // inferred from electronic annotation//0045893 // positive regulation of transcription, DNA-templated // not reco  |
| 0.042825 | 860.3127            | 1167.1267          | NM_009676//XM_006491-1.36  |           | <b>Aox1</b>            | aldehyde oxidase 1                                                                                                                                    | 0005514 // oxidation-reduction process // inferred from electronic annotation                                                                                           |
| 0.038405 | 3502.844            | 4765.1333          | NM_025650                  | 1.36      | <b>Uqc11</b>           | ubiquinol-cytochrome c reductase, complex III subunit XI                                                                                              | 0006810 // transport // inferred from electronic annotation//0055114 // oxidation-reduction process // inferred from electronic annotation//1902600 // hydrogen ion     |
| 0.04941  | 1140.442            | 1560.2775          | NM_001114970//NM_001-1.37  |           | <b>Slc16a11</b>        | solute carrier family 16 (monocarboxylic acid transporters), member 11                                                                                | 0006629 // lipid metabolic process // not recorded//0006810 // transport // inferred from electronic annotation//0015718 // monocarboxylic acid transport // ---//00    |
| 0.0489   | 872.35706           | 1197.4795          | NM_001302138//NM_001-1.37  |           | <b>Vamp17</b>          | vesicle-associated membrane protein 17                                                                                                                | 0006810 // transport // inferred from electronic annotation//0006887 // exocytosis // not recorded//0006888 // ER to Golgi vesicle-mediated transport // not record     |
| 0.038713 | 540.09784           | 741.47784          | NM_144844//XM_006511-1.37  |           | <b>Pcca</b>            | propionyl-Coenzyme A carboxylase, alpha polypeptide                                                                                                   | 0008152 // metabolic process // inferred from electronic annotation                                                                                                     |
| 0.049864 | 621.2741            | 415.4482           | NM_007713//XM_006511-1.38  |           | <b>Clk3</b>            | CDK-like kinase 3                                                                                                                                     | 0006468 // protein phosphorylation // inferred from direct assay//0006468 // protein phosphorylation // not recorded//0016310 // phosphorylation // inferred from e     |
| 0.049219 | 1558.7548           | 2147.0571          | NM_001010930//NM_001-1.38  |           | <b>Gml12540//Mrps3</b> | predicted gene 12540//mitochondrial ribosomal protein 533                                                                                             |                                                                                                                                                                         |
| 0.0486   | 3012.044            | 4194.0224          | NR_003513//NR_131212-1.38  |           | <b>Neat1</b>           | nuclear paraspeckle assembly transcript 1 (non-protein coding)                                                                                        | 0030575 // nuclear body organization // inferred from mutant phenotype//0043954 // cellular component maintenance // inferred from direct assay//0043954 // cellu       |
| 0.041197 | 236.48164           | 326.7122           | XM_977361                  | 1.38      | <b>Tcrb-1//LOC6550</b> | T cell receptor beta, joining region//T cell receptor beta-2 chain C                                                                                  | region-like//T cell receptor beta, constant region 1//T cell receptor beta, constant 2                                                                                  |
| 0.045259 | 485.95206           | 675.1463           | NM_026765//XM_006500-1.39  |           | <b>Uck1</b>            | uridine-cytidine kinase 1-like 1                                                                                                                      | 0006206 // pyrimidine nucleobase metabolic process // not recorded//0006222 // UMP biosynthetic process // ---//0006222 // UMP biosynthetic process // inferred fr      |
| 0.048728 | 296.35696           | 412.21576          | NM_138951                  | 1.39      | <b>Ttc36</b>           | tetratricopeptide repeat domain 36                                                                                                                    |                                                                                                                                                                         |
| 0.038405 | 843.4365            | 1173.7635          | NM_016665//XM_006531-1.39  |           | <b>Str13</b>           | stimulated by retinoic acid 13                                                                                                                        | 0000712 // resolution of meiotic recombination intermediates // not recorded//0006281 // DNA repair // inferred from electronic annotation//0006974 // cellular resp    |
| 0.044264 | 1082.6326           | 1507.5061          | NM_007620                  | 1.39      | <b>Cbr1</b>            | carboxyl reductase 1                                                                                                                                  | 0008152 // metabolic process // inferred from electronic annotation//0017144 // drug metabolic process // not recorded//0030855 // epithelial cell differentiation // i |
| 0.048728 | 616.8076            | 870.6265           | NM_026686                  | 1.41      | <b>Tefm</b>            | transcription elongation factor, mitochondrial                                                                                                        | 0006119 // oxidative phosphorylation // not recorded//0006259 // DNA metabolic process // not recorded//0006351 // transcription, DNA-templated // inferred from        |
| 0.038405 | 1103.6636           | 1574.5457          | NM_025353//XM_006531-1.43  |           | <b>Uqcq</b>            | ubiquinol-cytochrome c reductase, complex III subunit VII                                                                                             | 0006810 // transport // inferred from electronic annotation//0021539 // subthalamus development // inferred from expression pattern//0021548 // pons developer          |
| 0.041134 | 498.89755           | 711.9223           | NM_001286217//NM_001-1.43  |           | <b>Fuocm</b>           | fucoase mutarotase                                                                                                                                    | 0005996 // monosaccharide metabolic process // inferred from electronic annotation//0006004 // fucoase metabolic process // inferred from direct assay//0036065 //      |
| 0.044232 | 19.238907           | 27.458847          |                            | 1.43      | <b>C76798</b>          | expressed sequence C76798                                                                                                                             |                                                                                                                                                                         |
| 0.041197 | 1766.3695           | 2552.7488          | NM_025559                  | 1.45      | <b>Mien1</b>           | migration and invasion enhancer 1                                                                                                                     | 0006915 // apoptotic process // inferred from electronic annotation//0030335 // positive regulation of cell migration // not recorded//0043066 // negative regulation   |
| 0.046012 | 1141.71             | 1650.7617          | NM_027204                  | 1.45      | <b>Mrp12</b>           | mitochondrial ribosomal protein L12                                                                                                                   | 0006390 // transcription from mitochondrial promoter // not recorded//0006412 // translation // inferred from sequence or structural similarity//0045893 // positive    |
| 0.047179 | 292.8371            | 424.46414          | NM_027460//XM_011251-1.45  |           | <b>Slc25a33</b>        | solute carrier family 25, member 33                                                                                                                   | 0000002 // mitochondrial genome maintenance // not recorded//0002082 // regulation of oxidative phosphorylation // not recorded//0006264 // mitochondrial DNA           |
| 0.049711 | 439.25894           | 637.5859           | NM_011220                  | 1.45      | <b>Pts</b>             | 6-pyruvyl-tetrahydropterin synthase                                                                                                                   | 0006729 // tetrahydrobiopterin biosynthetic process // inferred from direct assay                                                                                       |
| 0.04941  | 4502.7183           | 6539.9336          | NM_025641                  | 1.45      | <b>Ahr</b>             | ubiquinol-cytochrome c reductase hinge protein                                                                                                        | 0006122 // mitochondrial electron transport, ubiquinol to cytochrome c // inferred from electronic annotation//0006810 // transport // inferred from electronic annota  |
| 0.046012 | 37.01822            | 53.875175          | NM_001081070//XM_000-1.46  |           | <b>Pdia2</b>           | protein disulfide isomerase associated 2                                                                                                              | 0006457 // protein folding // traceable author statement//0006457 // protein folding // inferred from electronic annotation//0008152 // metabolic process // inferred   |
| 0.038405 | 349.09006           | 485.4858           | XM_977361                  | 1.46      | <b>LOC65506//Tcrb</b>  | T cell receptor beta-2 chain C region-like//T cell receptor beta, constant 2//T cell receptor beta, joining region//T cell receptor beta, variable 26 | 0018023 // peptidyl-lysine trimethylation // inferred from mutant phenotype//0032259 // methylation // inferred from electronic annotation//1904733 // negative reg     |
| 0.0486   | 318.0146            | 464.25732          | NM_001252094//NM_001-1.46  |           | <b>Mettl20</b>         | methyltransferase like 20                                                                                                                             | 0008283 // cell proliferation // not recorded//0042127 // regulation of cell proliferation // not recorded//0042254 // ribosome biogenesis // not recorded//1902895 /   |
| 0.045259 | 661.1228            | 970.5638           | NM_153547//NM_17884-1.47   |           | <b>Zbtb11</b>          | zinc finger and BTB domain containing 11                                                                                                              | 0006351 // transcription, DNA-templated // inferred from electronic annotation//0006355 // regulation of transcription, DNA-templated // inferred from electronic ann   |
| 0.039357 | 235.25885           | 346.95377          | NM_001040686//NM_001-1.47  |           | <b>Zfp692</b>          | zinc finger protein 692                                                                                                                               |                                                                                                                                                                         |
| 0.037386 | 721.05054           | 1069.5739          | NM_173026//XM_011242-1.48  |           | <b>Zbtb11</b>          | zinc finger and BTB domain containing 11                                                                                                              |                                                                                                                                                                         |
| 0.038405 | 951.30585           | 1425.4102          | NM_025349//XM_006511-1.50  |           | <b>Lsm7</b>            | LSM7 homolog, U6 small nuclear RNA associated (S. cerevisiae)                                                                                         | 0000398 // mRNA splicing, via spliceosome // inferred from electronic annotation//0006396 // RNA processing // not recorded//0006397 // mRNA processing // infer        |
| 0.04941  | 310.8811            | 466.65048          | NM_001145948//NM_001-1.50  |           | <b>Ttc39a</b>          | tetratricopeptide repeat domain 39A                                                                                                                   |                                                                                                                                                                         |
| 0.04723  | 457.8883            | 692.8698           | NM_001160378//NM_001-1.51  |           | <b>Fam46a</b>          | family with sequence similarity 46, member A                                                                                                          | 0010468 // regulation of gene expression // not recorded//0030193 // regulation of blood coagulation // not recorded                                                    |
| 0.044568 | 40.306248           | 61.026524          |                            | 1.51      | <b>A930007D18rik</b>   | RIKEN cDNA A930007D18 gene                                                                                                                            |                                                                                                                                                                         |
| 0.038405 | 61.677505           | 63.433083          | NM_009162                  | 1.52      | <b>Srg5</b>            | secretogranin V                                                                                                                                       | 0006810 // transport // inferred from electronic annotation//0006886 // intracellular protein transport // inferred from direct assay//0007218 // neuropeptide signalr  |
| 0.038405 | 260.5462            | 397.86157          | XM_977361                  | 1.53      | <b>LOC65506//Tcrb</b>  | T cell receptor beta-2 chain C region-like//T cell receptor beta, constant 2//T cell receptor beta, joining region//T cell receptor beta, variable 26 | 0006351 // transcription, DNA-templated // inferred from electronic annotation//0006355 // regulation of transcription, DNA-templated // inferred from electronic ann   |
| 0.040334 | 428.5794            | 657.0457           | NM_001114879//NM_001-1.53  |           | <b>Fam208a</b>         | family with sequence similarity 208, member A                                                                                                         | 0006779 // porphyrin-containing compound biosynthetic process // not recorded//0006810 // transport // not recorded//0007420 // brain development // not record         |
| 0.038405 | 306.48367           | 469.9942           | NM_023732//XM_006491-1.53  |           | <b>Acb6b</b>           | ATP-binding cassette, sub-family B (MDR/TAP), member 6                                                                                                | 0002082 // regulation of oxidative phosphorylation // inferred from mutant phenotype//0002082 // regulation of oxidative phosphorylation // not recorded//0034551       |
| 0.041949 | 1135.9435           | 1747.348           | NM_028063//XM_006524-1.54  |           | <b>Uqc2c</b>           | ubiquinol-cytochrome c reductase complex assembly factor 2                                                                                            | 0007368 // determination of left/right symmetry // inferred from mutant phenotype//0007507 // heart development // inferred from mutant phenotype                       |
| 0.041949 | 53.28974            | 82.348274          | NM_027725//XM_027636-1.55  |           | <b>Daw1</b>            | dynein assembly factor with WDR repeat domains 1                                                                                                      | 0006351 // transcription, DNA-templated // inferred from electronic annotation//0006355 // regulation of transcription, DNA-templated // inferred from electronic ann   |
| 0.049336 | 2274.0522           | 3525.3977          | NM_170777                  | 1.55      | <b>Elof1</b>           | elongation factor 1 homolog (ELF1, S. cerevisiae)                                                                                                     |                                                                                                                                                                         |
| 0.049864 | 836.24603           | 1297.9843          | NM_001037913//XM_000-1.55  |           | <b>Ccdc107</b>         | coiled-coil domain containing 107                                                                                                                     |                                                                                                                                                                         |
| 0.04941  | 711.8731            | 1107.1307          | NM_021788                  | 1.56      | <b>Sap30</b>           | sin3 associated polypeptide                                                                                                                           | 0000122 // negative regulation of transcription from RNA polymerase II promoter // inferred from direct assay//0000183 // chromatin silencing at rDNA // traceable au   |
| 0.038405 | 170.08076           | 265.13123          | NM_027829//XM_006514-1.56  |           | <b>Izumo4</b>          | IZUMO family member 4                                                                                                                                 |                                                                                                                                                                         |
| 0.049864 | 103.268234          | 161.00058          | NM_029801//XM_006500-1.56  |           | <b>Tsac</b>            | TSK6 activating co-chaperone                                                                                                                          | 0045860 // positive regulation of protein kinase activity // not recorded//1904030 // negative regulation of cyclin-dependent protein kinase activity // ---            |
| 0.038405 | 267.83148           | 419.3986           | NM_026633//XM_006524-1.57  |           | <b>Fam195a</b>         | family with sequence similarity 195, member A                                                                                                         |                                                                                                                                                                         |
| 0.04941  | 272.86652           | 428.1105           | NM_001164190//NM_001-1.57  |           | <b>Mtm1</b>            | X-linked myotubular myopathy gene 1                                                                                                                   | 0006470 // protein dephosphorylation // not recorded//0006629 // lipid metabolic process // inferred from electronic annotation//0006810 // transport // inferred fr    |
| 0.038405 | 666.018             | 1062.4897          | NM_009402                  | 1.60      | <b>Pglyrp1</b>         | peptidoglycan recognition protein 1                                                                                                                   | 0002221 // pattern recognition receptor signaling pathway // not recorded//0002376 // immune system process // inferred from electronic annotation//0006915 // a        |
| 0.038405 | 26.72522            | 42.908756          |                            | 1.61      | <b>C77805</b>          | expressed sequence C77805                                                                                                                             |                                                                                                                                                                         |
| 0.038405 | 904.64264           | 1464.0131          | NM_030677                  | 1.62      | <b>Gpx2</b>            | glutathione peroxidase 2                                                                                                                              | 0001659 // temperature homeostasis // inferred from genetic interaction//0002862 // negative regulation of inflammatory response to antigenic stimulus // inferred fr   |
| 0.04941  | 529.1728            | 873.3403           | NM_001033261//XM_000-1.65  |           | <b>Zfc3h1</b>          | zinc finger, C3H1-type containing chemokine (C-X-C motif) ligand 2                                                                                    | 0006396 // RNA processing // inferred from electronic annotation                                                                                                        |
| 0.038405 | 30.241604           | 50.01674           | NM_009140                  | 1.65      | <b>Cxcl2</b>           | chemokine (C-X-C motif) ligand 2                                                                                                                      | 0001975 // response to amphetamine // inferred from electronic annotation//0002237 // response to molecule of bacterial origin // inferred from direct assay//00026     |
| 0.043007 | 228.67743           | 378.75113          | NM_030075//XM_006511-1.66  |           | <b>Klhdcb8</b>         | kelch domain containing 8B                                                                                                                            |                                                                                                                                                                         |
| 0.04941  | 416.41345           | 697.16455          | NM_001254761//NM_001-1.67  |           | <b>Rnf128</b>          | ring finger protein 128                                                                                                                               | 0016567 // protein ubiquitination // inferred from direct assay//0016567 // protein ubiquitination // inferred from electronic annotation//0016567 // protein ubiquitin |
| 0.038405 | 45.30973            | 75.9462            | NM_001110506//NM_001-1.68  |           | <b>Efcab12</b>         | EF-hand calcium binding domain 12                                                                                                                     |                                                                                                                                                                         |
| 0.038405 | 19.481081           | 33.880554          |                            | 1.74      | <b>AU021001</b>        | expressed sequence AU021001                                                                                                                           |                                                                                                                                                                         |
| 0.038405 | 311.3006            | 545.1864           | NM_007931//XR_374059-1.75  |           | <b>Endog</b>           | endonuclease G                                                                                                                                        | 0001701 // in utero embryonic development // inferred from mutant phenotype//0006308 // DNA catabolic process // traceable author statement//0006309 // apopt           |
| 0.046461 | 47.03804            | 83.95114           | NM_001164785//NM_001-1.78  |           | <b>Adams20</b>         | a disintegrin-like and metallopeptidase (repolyrin type) with thrombospondin type 1 motifs                                                            | 0006508 // proteolysis // inferred from direct assay//0007229 // integrin-mediated signaling pathway // inferred from electronic annotation//0009967 // positive regu   |
| 0.038405 | 259.65488           | 464.33987          | NM_133660//XM_006531-1.79  |           | <b>Ces1e</b>           | carboxylesterase 1E                                                                                                                                   | 0008152 // metabolic process // inferred from electronic annotation//0016042 // lipid catabolic process // ---                                                          |

| p [Corr] | [C3H/HeN, P56][raw] | [Gsr-KO, P56][raw] | RefSeq Transcript ID | FD @PND56 | Gene Symbol         | Gene Title                                                      | Gene Ontology Biological Process                                                                                                                                      |
|----------|---------------------|--------------------|----------------------|-----------|---------------------|-----------------------------------------------------------------|-----------------------------------------------------------------------------------------------------------------------------------------------------------------------|
| 0.038405 | 108.183136          | 193.67982          | XR_870188//XR_870189 | 1.79      | <b>Gm29782</b>      | predicted gene, 29782                                           |                                                                                                                                                                       |
| 0.033755 | 807.6589            | 1450.5835          | NR_045471//NR_130109 | 1.80      | <b>Fendrr</b>       | Foxf1 adjacent non-coding developmental regulatory RNA          | 0009791 // post-embryonic development // inferred from mutant phenotype//0031061 // negative regulation of histone methylation // inferred from mutant phenotyp       |
| 0.035203 | 152.70503           | 275.17526          | NM_001081069         | 1.80      | <b>Rgs11</b>        | regulator of G-protein signaling 11                             | 0007186 // G-protein coupled receptor signaling pathway // traceable author statement//0009968 // negative regulation of signal transduction // inferred from electri |
| 0.026847 | 269.7194            | 510.2515           | NM_013487//XM_006505 | 1.89      | <b>Cd3d</b>         | CD3 antigen, delta polypeptide                                  | 0006461 // protein complex assembly // non-traceable author statement//0007166 // cell surface receptor signaling pathway // inferred from electronic annotation//C   |
| 0.038405 | 151.41887           | 293.8693           | NM_177290//XM_006516 | 1.94      | <b>Irgb8</b>        | integrin beta 8                                                 | 0001573 // ganglioside metabolic process // inferred from mutant phenotype//0007155 // cell adhesion // inferred from electronic annotation//0007160 // cell-matrix   |
| 0.049711 | 1115.6477           | 2169.2866          | NM_001290740//NM_01  | 1.94      | <b>Cwc22//Xdh</b>   | CWC22 spliceosome-associated protein homolog (S. cerevisiae)//> | 0000398 // mRNA splicing, via spliceosome // not recorded//0001933 // negative regulation of protein phosphorylation // not recorded//0001937 // negative regulatic   |
| 0.04941  | 422.68167           | 846.8321           | NM_001302559//NM_01  | 2.00      | <b>Sjfn4//Sjfn3</b> | schlafen 4//schlafen 3                                          | 0008285 // negative regulation of cell proliferation // inferred from direct assay                                                                                    |
| 0.022647 | 82.04181            | 172.38866          | NM_001254953//XM_006 | 2.10      | <b>Ankrd66</b>      | ankyrin repeat domain 66                                        |                                                                                                                                                                       |
| 0.038405 | 2049.9666           | 4665.2554          | NM_001281830//NM_02  | 2.28      | <b>Ijz712a</b>      | interferon, alpha-inducible protein 27 like 2A                  | 0007568 // aging // inferred from direct assay//0009615 // response to virus // inferred from direct assay                                                            |
| 0.033755 | 455.56992           | 1119.032           | NM_011315            | 2.46      | <b>Saa3</b>         | serum amyloid A 3                                               | 0006953 // acute-phase response // inferred from electronic annotation//0007252 // i-kappaB phosphorylation // inferred from direct assay//0035634 // response to s   |
| 0.023287 | 111.20848           | 277.16113          | NM_001291131//NM_00  | 2.49      | <b>Asgr1</b>        | asialoglycoprotein receptor 1                                   | 0006897 // endocytosis // inferred from electronic annotation//0006898 // receptor-mediated endocytosis // not recorded//0031668 // cellular response to extracellu   |
| 0.030801 | 241.65337           | 618.6185           | NM_144930//XR_387740 | 2.56      | <b>Ces1f</b>        | carboxylesterase 1F                                             | 0019626 // short-chain fatty acid catabolic process // inferred from direct assay                                                                                     |
