# Supplementary material for: Glutathione reductase deficiency alters lung development and hyperoxic responses in neonatal mice
Source: PubMed Central journal article supplement — Redox Biol. 2020 Nov 13;38:101797. doi: 10.1016/j.redox.2020.101797 (PMC7708869; doi:10.1016/j.redox.2020.101797), 2020-11-13
Supplement: mmc4.pdf [file mmc4.pdf]

| [CBH/HeN, Air][raw] | [CBH/HeN, O2][raw] | [Gsr-KO, Air][raw] | [Gsr-KO, O2][raw] | RefSeq Transcript ID | p (Genotype-Exposure) | FC [WT, Air vs O2] | FC [KO, Air vs O2] | FD [WT O2 vs KO O2] | Gene Symbol                      | Gene Title                                                               | Gene Ontology Biological Process                                                                                                                                        |
|---------------------|--------------------|--------------------|-------------------|----------------------|-----------------------|--------------------|--------------------|---------------------|----------------------------------|--------------------------------------------------------------------------|-------------------------------------------------------------------------------------------------------------------------------------------------------------------------|
| 78.50476            | 83.57728           | 81.85938           | 74.15306          | NM_153061//NR_10     | 0.009946417           | 1.065              | -1.104             | -1.127              | <b>Tsp2</b>                      | TGF-beta1-induced anti-apoptotic factor 2                                |                                                                                                                                                                         |
| 548.4758            | 680.0645           | 770.6171           | 601.928           | NM_001039181//NM     | 0.005818703           | 1.240              | -1.280             | -1.130              | <b>Npr3</b>                      | natriuretic peptide receptor 3                                           | 0001501 // skeletal system development // inferred from direct assay//0001501 // skeletal system development // inferred from mutant phenotype//0002158 // osteob       |
| 498.83173           | 577.6723           | 542.535            | 504.32684         | NM_001039215//NM     | 0.001658322           | 1.156              | -1.076             | -1.145              | <b>Pfkfb4</b>                    | 6-phosphofructo-2-kinase/fructose-2,6-bisphosphatase 4                   | 0006000 // fructose metabolic process // inferred from electronic annotation//0006003 // fructose 2,6-bisphosphate metabolic process // inferred from electronic annota |
| 760.32666           | 871.6596           | 893.9743           | 759.65546         | NM_001081150         | 0.001133994           | 1.167              | -1.177             | -1.147              | <b>Lonf1</b>                     | LON peptidase N-terminal domain and ring finger 1                        | 0006508 // proteolysis // inferred from electronic annotation                                                                                                           |
| 385.27368           | 449.71663          | 483.1919           | 387.40793         | NM_013867//NM_OC     | 1.30E-04              | 1.146              | -1.247             | -1.161              | <b>Bca3</b>                      | breast cancer anti-estrogen resistance 3                                 | 0002089 // lens morphogenesis in camera-type eye // inferred from mutant phenotype//0007165 // signal transduction // inferred from electronic annotation//0007264      |
| 554.0281            | 765.62036          | 619.1688           | 656.87244         | NM_001114098//NM     | 0.00805221            | 1.382              | 1.061              | -1.166              | <b>Mtn1</b>                      | microtubule crosslinking factor 1                                        | 0001578 // microtubule bundle formation // inferred from direct assay//0010506 // regulation of autophagy // inferred from electronic annotation//0045197 // establis   |
| 110.14734           | 123.800865         | 115.75199          | 105.61847         |                      | 0.000804004           | 1.124              | -1.096             | -1.172              | <b>C77097</b>                    | expressed sequence C77097                                                |                                                                                                                                                                         |
| 67.583115           | 38.96788           | 36.072266          | 33.06806          | NM_145146            | 0.005742774           | -1.734             | -1.091             | -1.178              | <b>Afm</b>                       | afamin                                                                   | 0006810 // transport // inferred from electronic annotation//0051180 // vitamin transport // not recorded                                                               |
| 2915.611            | 3436.7405          | 3575.5144          | 2819.8708         | NM_133725//NM_1      | 0.00999848            | 1.179              | -1.268             | -1.219              | <b>Secibp2l</b>                  | SECS binding protein 2-like                                              |                                                                                                                                                                         |
| 1710.4757           | 2207.7852          | 1961.248           | 1809.4072         | NM_001025250//NM     | 0.003167039           | 1.291              | -1.084             | -1.220              | <b>Vegfa</b>                     | vascular endothelial growth factor A                                     | 0000122 // negative regulation of transcription from RNA polymerase II promoter // not recorded//0001525 // angiogenesis // inferred from direct assay//0001525 // ar   |
| 355.8095            | 425.62427          | 379.70976          | 347.82846         | NM_175187//NR_O2     | 0.004542776           | 1.196              | -1.092             | -1.224              | <b>Tmm151b</b>                   | transmembrane protein 151B                                               |                                                                                                                                                                         |
| 37.44921            | 44.33614           | 38.355804          | 36.149307         |                      | 0.009915507           | 1.184              | -1.061             | -1.226              | <b>D11rat644e</b>                | DNA segment, Chr 1, ERATO Dsl 646, expressed                             |                                                                                                                                                                         |
| 66.743034           | 73.25703           | 68.7475            | 59.705116         | NM_177052//NM_OC     | 0.004596748           | 1.098              | -1.151             | -1.227              | <b>Kif6</b>                      | kinesin family member 6                                                  | 0007018 // microtubule-based movement // not recorded//0008152 // metabolic process // inferred from electronic annotation                                              |
| 605.0476            | 679.1741           | 614.92474          | 544.8614          | NM_026368//NM_OC     | 0.001098655           | 1.123              | -1.129             | -1.247              | <b>Coap1</b>                     | casepase activity and apoptosis inhibitor 1                              | 0006915 // apoptotic process // inferred from electronic annotation                                                                                                     |
| 32.1485             | 32.640057          | 30.868538          | 25.986841         |                      | 0.008977985           | 1.015              | -1.188             | -1.256              | <b>943008723Rik</b>              | RIKEN cDNA 943008723 gene                                                |                                                                                                                                                                         |
| 28.196205           | 36.272247          | 32.59862           | 28.606833         |                      | 0.005570435           | 1.266              | -1.140             | -1.268              | <b>D71rat558e</b>                | DNA segment, Chr 7, ERATO Dsl 558, expressed                             |                                                                                                                                                                         |
| 166.81755           | 211.61995          | 168.47212          | 166.18628         | NM_030110//NM_OC     | 0.006348874           | 1.269              | -1.014             | -1.273              | <b>Micu3</b>                     | mitochondrial calcium uptake family, member 3                            |                                                                                                                                                                         |
| 143.05722           | 28.310953          | 20.604244          | 21.480125         | NM_001150749//NM     | 0.007889654           | -5.053             | 1.043              | -1.318              | <b>Rdh7</b>                      | retinol dehydrogenase 7                                                  | 0008152 // metabolic process // inferred from electronic annotation//0042572 // retinol metabolic process // inferred from electronic annotation//0055114 // oxidator   |
| 511.498             | 723.33057          | 550.2367           | 547.33636         | NM_007707//NM_O1     | 0.006182605           | 1.414              | -1.005             | -1.322              | <b>Soc3</b>                      | suppressor of cytokine signaling 3                                       | 0001666 // response to hypoxia // inferred from electronic annotation//0001932 // regulation of protein phosphorylation // inferred from direct assay//0006469 // negi  |
| 1531.4441           | 1833.0116          | 1756.8998          | 1347.1793         | NM_001012766//NM     | 0.003918618           | 1.197              | -1.304             | -1.361              | <b>Eorps2//Eor1//Eor2//Eor2l</b> | eosinophili-associated, ribonuclease A family, pseudogene 2//eosinophili | 0006935 // chemotaxis // inferred from direct assay//0008152 // metabolic process // inferred from electronic annotation//0050305 // nucleic acid phosphodiester bon    |
| 128.37373           | 20.784555          | 15.921132          | 15.100804         | NM_029562//NM_OC     | 0.005814837           | -6.176             | -1.053             | -1.375              | <b>Cyp2d6</b>                    | cytochrome P450, family 2, subfamily 6, polypeptide 2c                   | 0006865 // xenobiotic metabolic process // not recorded//0007565 // female pregnancy // inferred from electronic annotation//0003969 // arachidonic acid metabolic p    |
| 125.92949           | 179.2413           | 2265.6091          | 118.197014        | NM_008725            | 0.008516206           | 1.423              | -19.168            | -1.516              | <b>Napa</b>                      | natriuretic peptide type A                                               | 0001666 // response to hypoxia // inferred from electronic annotation//0003085 // negative regulation of systemic arterial blood pressure // not recorded//0006182 //   |
| 481.74808           | 49.186993          | 36.431168          | 30.955608         | NM_007376            | 0.004647014           | -9.794             | -1.177             | -1.589              | <b>Pzp</b>                       | pregnancy zone protein                                                   | 0007566 // embryo implantation // inferred from genetic interaction//0010466 // negative regulation of peptidase activity // inferred from electronic annotation//0010  |
