# Supplementary material for: Glutathione reductase deficiency alters lung development and hyperoxic responses in neonatal mice
Source: PubMed Central journal article supplement — Redox Biol. 2020 Nov 13;38:101797. doi: 10.1016/j.redox.2020.101797 (PMC7708869; doi:10.1016/j.redox.2020.101797), 2020-11-13
Supplement: mmc5.pdf [file mmc5.pdf]

**Table S5. Lung genes (n=1033) significantly changed by hyperoxia (O2) in wild-type (Gsr- WT) mouse neonates at PND5 (moderated t-test, p < 0.001).**

Blue(-): fold decreased by O2. Red (+): fold increased by O2.

| [CH/Hen, Air/rw] | [CH/Hen, O2/rw] | RefSeq       | Transcript ID  | p        | FC (Air:O2 at PND5) | Gene Symbol             | Gene Title                                                                                               | Gene Ontology Biological Process                                                                                                                                                                                      |
|------------------|-----------------|--------------|----------------|----------|---------------------|-------------------------|----------------------------------------------------------------------------------------------------------|-----------------------------------------------------------------------------------------------------------------------------------------------------------------------------------------------------------------------|
| 37.38233         | 123.414505      | NM_008036    | XM_006710006.1 | 5.84E-04 | 3.30                | <b>Fosb</b>             | FB1 osteoblast oncogene B                                                                                | 0006355 // regulation of transcription, DNA-templated // inferred from electronic annotation // 0006357 // regulation of transcription from RNA polymerase II promoter // inferred from electronic annotation         |
| 37.79392         | 231.76727       | NM_009704    | 0.005845343    | 2.97     | 2.97                | <b>Amyg</b>             | amygdalin                                                                                                | 0007172 // epidermal growth factor receptor signaling pathway // not recorded // 0007186 // G-protein coupled receptor signaling pathway // not recorded // 0008284 // positive regulation of cell                    |
| 152.11726        | 409.99592       | NM_011198    | 0.005421948    | 2.63     | 2.63                | <b>Ptgs2</b>            | prostaglandin-endoperoxide synthase 2                                                                    | 0001516 // prostaglandin biosynthetic process // inferred from direct assay // 0001516 // prostaglandin biosynthetic process // not recorded // 0001525 // angiogenesis // not recorded // 0000629                    |
| 183.2235         | 1995.0363       | NM_010234    | 6.40E-04       | 2.45     | 2.45                | <b>Fos</b>              | FB1 osteoblast oncogene                                                                                  | 0001661 // conditioned taste aversion // inferred from electronic annotation // 0006355 // regulation of transcription, DNA-templated // inferred from direct assay // 0006355 // regulation of transcription         |
| 140.6054         | 339.85855       | NM_139134    | 0.001574421    | 2.42     | 2.42                | <b>Chodl</b>            | cholesterolin                                                                                            | 0010975 // regulation of neuron projection development // inferred from genetic interaction                                                                                                                           |
| 980.0045         | 2356.3657       | NM_010444    | 0.000670000    | 2.86E-04 | 2.40                | <b>Nr4a1</b>            | nuclear receptor subfamily 4, group A, member 1                                                          | 0001938 // positive regulation of endothelial cell proliferation // not recorded // 0002042 // cell migration involved in sprouting angiogenesis // not recorded // 0006351 // transcription, DNA-templated           |
| 1424.2388        | 3373.7683       | NM_007913    | 1.86E-05       | 2.37     | 2.37                | <b>Egr1</b>             | early growth response 1                                                                                  | 0000012 // negative regulation of transcription from RNA polymerase II promoter // inferred from direct assay // 00001975 // response to amphetamine // not recorded // electronic annotation // 00001300             |
| 439.88135        | 960.6826        | NM_008871    | 0.001247915    | 2.18     | 2.18                | <b>Serpine1</b>         | serpine (or cysteine) peptidase inhibitor, clade E, member 1                                             | 00001300 // chronological cell aging // inferred from electronic annotation // 0001525 // angiogenesis // not recorded // inferred from electronic annotation // 00001890 // placenta development // inferred from mu |
| 56.472225        | 56.36958        | NM_011990    | 0.001099438    | 2.13     | 2.13                | <b>Slc7a11</b>          | solute carrier family 7 (cationic amino acid transporter, y system), member 11                           | 0003335 // amino acid transmembrane transport // inferred from electronic annotation // 0006810 // transport // inferred from electronic annotation // 0006865 // amino acid transport // inferred                    |
| 162.35665        | 328.37933       | NM_001099774 | 0.001789968    | 2.04     | 2.04                | <b>Krtap17-1</b>        | keratin associated protein 17-1                                                                          |                                                                                                                                                                                                                       |
| 54.131863        | 105.7784        |              | 0.002377528    | 1.95     | 1.95                | <b>Aa407107</b>         | expressed sequence AA407107                                                                              |                                                                                                                                                                                                                       |
| 1931.0345        | 3541.6222       | NM_019738    | 0.001172722    | 1.83     | 1.83                | <b>Nupr1</b>            | nuclear protein transcription regulator 1                                                                | 0002526 // acute inflammatory response // inferred from mutant phenotype // 0006351 // transcription, DNA-templated // inferred from electronic annotation // 0006355 // regulation of transcription                  |
| 479.9306         | 879.5057        | NM_001291892 | 0.002088835    | 1.83     | 1.83                | <b>Litrb4b//Litrb4a</b> | leukocyte immunoglobulin-like receptor, subfamily B, member 4B // leukocyte immunoglobulin-like receptor | 0000250 // adaptive immune response // inferred from electronic annotation // 0002376 // immune system process // inferred from electronic annotation                                                                 |
| 3730.86          | 6707.5347       | NM_005247    | 0.0005247      | 1.80     | 1.80                | <b>Lyve1</b>            | lymphatic vessel endothelial hyaluronan receptor 1                                                       | 0006027 // glycosaminoglycan catabolic process // inferred from direct assay // 0006810 // transport // inferred from electronic annotation // 0007155 // cell adhesion // inferred from electronic annotation        |
| 1112.6222        | 1998.9093       | NM_010295    | 0.005294423    | 1.80     | 1.80                | <b>Gck</b>              | glutamate-cysteine ligase, catalytic subunit                                                             | 0006534 // cysteine metabolic process // not recorded // 0006536 // glutamate metabolic process // not recorded // 0006749 // glutathione metabolic process // inferred from mutant phenotype //                      |
| 796.40405        | 1414.1843       | NM_153127    | 0.008906208    | 1.78     | 1.78                | <b>Mmrn2</b>            | multimerin 2                                                                                             | 0001255 // angiogenesis // inferred from electronic annotation // 0003948 // negative regulation of vascular endothelial growth factor receptor signaling pathway // not recorded // 0009051 // neg                   |
| 272.83315        | 481.5459        | NM_001083894 | 0.006772635    | 1.76     | 1.76                | <b>Lipb</b>             | lipase, member B                                                                                         | 0006629 // lipid metabolic process // inferred from electronic annotation // 0016042 // lipid catabolic process // not recorded                                                                                       |
| 1284.7445        | 2238.7104       | NM_009549    | 0.003307177    | 1.74     | 1.74                | <b>Imnt</b>             | iodoethane N-methyltransferase                                                                           | 0009308 // amine metabolic process // not recorded // 0009636 // response to toxic substance // inferred from electronic annotation // 0032259 // methylation // not recorded                                         |
| 326.0312         | 571.71          | NM_008416    | 5.02E-04       | 1.72     | 1.72                | <b>Jamb</b>             | jun B proto-oncogene                                                                                     | 0000122 // negative regulation of transcription from RNA polymerase II promoter // not recorded // 0001570 // vasculogenesis // inferred from mutant phenotype // 0001649 // osteoblast different                     |
| 29.427765        | 49.945538       | NM_144555    | 0.002754304    | 1.70     | 1.70                | <b>Lncipnt</b>          | long non-protein-coding RNA, Trp53 induced transcript                                                    | 0032624 // multicellular organism growth // inferred from mutant phenotype                                                                                                                                            |
| 29.02982         | 49.20545        | NM_137377    | 0.002880002    | 1.69     | 1.69                | <b>Olfm2</b>            | olfactomedin 2                                                                                           | 0007601 // visual perception // inferred from mutant phenotype // 0007626 // locomotory behavior // inferred from mutant phenotype // 0009306 // protein secretion // not recorded // 0005152 //                      |
| 231.71495        | 3607.0237       | NM_013642    | 0.003945669    | 1.69     | 1.69                | <b>Dusp1</b>            | dual specificity phosphatase 1                                                                           | 0000188 // inactivation of MAPK activity // inferred from sequence or structural similarity // 0000188 // inactivation of MAPK activity // inferred from electronic annotation // 0001706 // endoderm                 |
| 194.57767        | 328.3086        | NM_00169153  | 0.006524343    | 1.69     | 1.69                | <b>Cd300f</b>           | CD300 antigen like family member F                                                                       | 0002073 // immune system process // inferred from electronic annotation // 00030316 // osteoclast differentiation // inferred from direct assay                                                                       |
| 268.94742        | 450.1406        | NM_029415    | 0.003441845    | 1.67     | 1.67                | <b>Slc10a6</b>          | solute carrier family 10 (sodium/bile acid cotransporter family), member 6                               | 0006810 // transport // inferred from electronic annotation // 0006811 // ion transport // inferred from electronic annotation // 0006814 // sodium ion transport // inferred from electronic annotation              |
| 112.42752        | 187.6374        | NM_001289925 | 4.54E-04       | 1.67     | 1.67                | <b>Egr3</b>             | early growth response 3                                                                                  | 0001938 // positive regulation of endothelial cell proliferation // not recorded // 0002042 // cell migration involved in sprouting angiogenesis // not recorded // 0006351 // transcription, DNA-templated           |
| 1042.2667        | 1726.719        | NM_010516    | 5.67E-04       | 1.66     | 1.66                | <b>Cyr61</b>            | cysteine rich protein 61                                                                                 | 0001558 // regulation of cell growth // inferred from electronic annotation // 0001649 // osteoblast differentiation // inferred from genetic interaction // 0001934 // positive regulation of protein pi             |
| 1421.7599        | 2333.789        | NR_003513    | 5.60E-04       | 1.64     | 1.64                | <b>Nect1</b>            | neural paraspindel assembly transcript 1 (non-protein coding)                                            | 0003575 // nuclear body organization // inferred from mutant phenotype // 0043954 // cellular component maintenance // inferred from direct assay // 0043954 // cellular component maintenance                        |
| 94.76352         | 190.0893        | NR_045032    | 0.004866362    | 1.64     | 1.64                | <b>Golp10</b>           | ganglioside-induced differentiation-associated-protein 10                                                |                                                                                                                                                                                                                       |
| 310.55615        | 507.42877       | NM_001127382 | 6.97E-04       | 1.63     | 1.63                | <b>Rbm47</b>            | RNA binding motif protein 47                                                                             |                                                                                                                                                                                                                       |
| 337.13852        | 540.2177        | NM_145839    | 0.0031381      | 1.63     | 1.63                | <b>Rasgef1b</b>         | RasGEF domain family, member 1B                                                                          | 0002244 // hematopoietic progenitor cell differentiation // inferred from mutant phenotype // 0016554 // cytidine to uridine editing // inferred from genetic interaction                                             |
| 4063.339         | 6472.9634       | NM_010406    | 0.007343931    | 1.59     | 1.59                | <b>Hc</b>               | hemolytic complement                                                                                     | 0007264 // small GTPase mediated signal transduction // inferred from electronic annotation // 0043547 // positive regulation of GTPase activity // inferred from electronic annotation                               |
| 42.479637        | 67.51076        | NM_007950    | 0.005589217    | 1.59     | 1.59                | <b>Ereg</b>             | epiregulin                                                                                               | 0001701 // in utero embryonic development // inferred from genetic interaction // 0002376 // immune system process // inferred from electronic annotation // 0006954 // inflammatory response //                      |
| 389.20187        | 616.508         | NM_001167860 | 1.63E-04       | 1.58     | 1.58                | <b>Wif3</b>             | WAS/WASF interacting protein family, member 3                                                            | 0000187 // activation of MAPK activity // not recorded // 0001525 // angiogenesis // inferred from electronic annotation // 0001550 // ovarian cumulus expansion // not recorded // 0001556 // ooc                    |
| 207.88284        | 328.71164       | NM_0101062   | 0.006640752    | 1.58     | 1.58                | <b>Dnase2a//Gm38426</b> | deoxyribonuclease II alpha // predicted gene, 38426                                                      | 0000147 // actin cortical patch assembly // -- // 0006891 // endocytosis // -- // 0007275 // multicellular organismal development // inferred from electronic annotation // 0000728 // spermatogen                    |
| 384.6075         | 603.5137        | NM_00109564  | 0.0021516      | 1.57     | 1.57                | <b>Igfb6</b>            | integrin beta 6                                                                                          | 0000737 // DNA catabolic process, endonucleolytic // inferred from mutant phenotype // 0006259 // DNA metabolic process // inferred from electronic annotation // 0006308 // DNA catabolic proc                       |
| 219.49326        | 343.8702        | NM_175437    | 0.006732043    | 1.57     | 1.57                | <b>Gisp</b>             | gamma-secretase activating protein                                                                       | 0006954 // inflammatory response // inferred from mutant phenotype // 0007155 // cell adhesion // inferred from electronic annotation // 0007160 // cell-matrix adhesion // inferred from electronic annotation       |
| 329.9717         | 514.5321        | NM_023755    | 5.74E-04       | 1.57     | 1.57                | <b>Tgcp11</b>           | transmembrane protein 245                                                                                | 0003162 // regulation of proteolysis // not recorded // 1902004 // positive regulation of beta-amyloid formation // inferred from direct assay // 1902004 // positive regulation of beta-amyloid form                 |
| 273.80663        | 422.76328       | NM_011391    | 0.007875001    | 1.55     | 1.55                | <b>Slc16a7</b>          | solute carrier family 16 (monocarboxylic acid transporters), member 7                                    | 0000122 // negative regulation of transcription from RNA polymerase II promoter // inferred from direct assay // 0009092 // cell morphogenesis // inferred from mutant phenotype // 0002070 // ep                     |
| 607.5148         | 936.553         | NM_178772    | 0.00530027     | 1.54     | 1.54                | <b>Nceh1</b>            | neural cholesteryl ester hydrolase 1                                                                     | 0006810 // transport // inferred from electronic annotation // 0001718 // monocarboxylic acid transport // inferred from electronic annotation // 0003587 // lactate transmembrane transport // not                   |
| 136.17421        | 209.46509       | NM_175388    | 0.00733492     | 1.54     | 1.54                | <b>Rnf169</b>           | ring finger protein 169                                                                                  | 0006470 // protein dephosphorylation // inferred from direct assay // 0006629 // lipid metabolic process // inferred from electronic annotation // 0006805 // xenobiotic metabolic process // infer                   |
| 214.55724        | 214.55724       | NM_001190400 | 0.001119591    | 1.53     | 1.53                | <b>Bend7</b>            | BEN domain containing 7                                                                                  | 0006974 // cellular response to DNA damage stimulus // not recorded // 0016567 // protein ubiquitination // inferred from electronic annotation // 2000780 // negative regulation of double-strand                    |
| 202.60489        | 309.27942       | NM_007498    | 0.008897428    | 1.53     | 1.53                | <b>Atf3</b>             | activating transcription factor 3                                                                        | 0000012 // negative regulation of transcription from RNA polymerase II promoter // not recorded // 0000122 // negative regulation of transcription from RNA polymerase II promoter //                                 |
| 961.4649         | 1450.4319       | NM_001038999 | 0.006759967    | 1.51     | 1.51                | <b>Atg18a1</b>          | ATPase, aminophosphotransferase (APLT), class I, type B, member 1                                        | 0006810 // transport // inferred from electronic annotation // 0006869 // ion transport // inferred from electronic annotation // 0007612 // learning // inferred from mutant phenotype // 000815:                    |
| 713.4025         | NM_175181       | 0.00131378   |                | 1.50     | 1.50                | <b>Tmem245</b>          | transmembrane protein 245                                                                                |                                                                                                                                                                                                                       |
| 57.84358         | 86.04273        | NM_001034874 | 0.002429239    | 1.49     | 1.49                | <b>Shisa6</b>           | shisa family member 6                                                                                    | 0048172 // regulation of short-term neuronal synaptic plasticity // not recorded                                                                                                                                      |
| 249.0627         | 367.32254       | NM_177628    | 0.002632302    | 1.47     | 1.47                | <b>Fam167a</b>          | family with sequence similarity 167, member A                                                            |                                                                                                                                                                                                                       |
| 47.12992         | 69.1932         |              | 0.003396256    | 1.47     | 1.47                | <b>C7648</b>            | expressed sequence C7648                                                                                 |                                                                                                                                                                                                                       |
| 187.11278        | 273.19156       | NM_001039056 | 6.02E-04       | 1.46     | 1.46                | <b>Kcnj15</b>           | potassium inwardly-rectifying channel, subfamily J, member 15                                            | 0006810 // transport // inferred from electronic annotation // 0006811 // ion transport // inferred from electronic annotation // 0006813 // potassium ion transport // inferred from data analysis //                |
| 2036.5303        | 2967.486        | NM_010664    | 0.003392058    | 1.46     | 1.46                | <b>Krt18</b>            | keratin 18                                                                                               | 0003209 // tumor necrosis factor-mediated signaling pathway // inferred from genetic interaction // 0043000 // Golgi to plasma membrane CFTR protein transport // not recorded // 0043066 // neg                      |
| 706.1365         | 1028.781        | NM_010573    | 0.009133884    | 1.46     | 1.46                | <b>Irx1</b>             | Iroquois related homeobox 1 (Drosophila)                                                                 | 0001656 // metanephros development // inferred from expression pattern // 0006355 // gene regulation // transcription, DNA-templated // inferred from electronic annotation // 0072086 // specification               |
| 31.268293        | 45.46484        | NM_001110506 | 0.003066656    | 1.45     | 1.45                | <b>Efcab12</b>          | EF-hand calcium binding domain 12                                                                        | 0006810 // transport // inferred from electronic annotation // 0006811 // ion transport // inferred from electronic annotation // 0006814 // sodium ion transport // inferred from direct assay // 0006               |
| 825.2685         | 1199.2144       | NM_0111324   | 3.66E-04       | 1.45     | 1.45                | <b>Scn10a</b>           | sodium channel, non-voltage-gated 1 alpha                                                                |                                                                                                                                                                                                                       |
| 271.50986        | 394.1254        | NM_177604    | 0.009171821    | 1.45     | 1.45                | <b>Aa98660</b>          | expressed sequence Aa98660                                                                               |                                                                                                                                                                                                                       |
| 257.6483         | 372.8141        | NM_001033348 | 5.02E-04       | 1.45     | 1.45                | <b>Ralgap2a</b>         | Ral GTPase activating protein, alpha subunit 2 (catalytic)                                               | 0003284 // Ral protein signal transduction // inferred from mutant phenotype // 0003280 // regulation of protein localization // inferred from mutant phenotype // 0005105 // regulation of small G                   |
| 297.86356        | 430.5035        | NM_00103258  | 0.001747617    | 1.45     | 1.45                | <b>Arfgap3</b>          | ARFGAP family member 3                                                                                   | 0001293 // negative regulation of phosphatase activity // not recorded // 0001692 // vesicle-mediated transport // not recorded // 00032012 // regulation of ARF protein signal transduction // infer                 |
| 633.51276        | 621.4129        | NM_001159367 | 0.00828187     | 1.43     | 1.43                | <b>Per1</b>             | period circadian clock 1                                                                                 | 0000212 // negative regulation of transcription from RNA polymerase II promoter // inferred from direct assay // 0000122 // negative regulation of transcription from RNA polymerase II promoter //                   |
| 404.45593        | 862.9674        | NM_008037    | 7.55E-04       | 1.43     | 1.43                | <b>Fosl2</b>            | fos-like antigen 2                                                                                       | 0001666 // response to hypoxia // not recorded // 0003334 // keratinocyte development // inferred from mutant phenotype // 0006351 // transcription, DNA-templated // inferred from electronic annotation             |
| 233.05194        | 323.2972        | NM_008381    | 0.005944416    | 1.43     | 1.43                | <b>Inhbb</b>            | inhibin beta-B                                                                                           | 0001654 // eye development // traceable autor statement // 0009267 // cellular response to starvation // inferred from expression pattern // 0009612 // response to mechanical stimulus // not re                     |
| 105.16504        | 146.81528       | NM_001033324 | 0.008637991    | 1.42     | 1.42                | <b>Zbtb16</b>           | zinc finger and BTB domain containing 16                                                                 | 0000012 // negative regulation of transcription from RNA polymerase II promoter // not recorded // 0001501 // skeletal system development // inferred from mutant phenotype // 0001823 // meso                        |
| 281.4342         | 399.89764       | NM_001037937 | 0.001361269    | 1.42     | 1.42                | <b>Dpdr</b>             | DEP domain containing MTOR-interacting protein                                                           | 0006468 // negative regulation of protein kinase activity // not recorded // 0003200 // negative regulation of TOR signaling // not recorded // 0003555 // intracellular signal transduction // inferred              |
| 293.3034         | 415.9969        | NM_009861    | 1.86E-04       | 1.42     | 1.42                | <b>Celsr1</b>           | cadherin, EGF-LAG seven-pass G-type receptor 1 (flamingo homolog, Drosophila)                            | 0001702 // gastrulation with mouth forming second // non-traceable autor statement // 0001736 // establishment of planar polarity // inferred from mutant phenotype // 0011764 // neuron mig                          |
| 234.62474        | 323.48288       | NM_144484    | 0.002238819    | 1.42     | 1.42                | <b>Eppk1</b>            | epiplakin 1                                                                                              |                                                                                                                                                                                                                       |
| 906.28265        | 1284.151        | NM_010019    | 0.005420953    | 1.42     | 1.42                | <b>Dapk2</b>            | death-associated protein kinase 2                                                                        | 0006468 // protein phosphorylation // not recorded // 0006468 // protein phosphorylation // inferred from sequence or structural similarity // 0006915 // apoptotic process // inferred from electronic annotation    |
| 520.8303         | 737.6758        | NM_010574    | 0.002051145    | 1.42     | 1.42                | <b>Irx2</b>             | Iroquois related homeobox 2 (Drosophila)                                                                 | 0001656 // metanephros development // inferred from expression pattern // 0006355 // regulation of transcription, DNA-templated // inferred from electronic annotation // 0072086 // specification                    |
| 511.498          | 723.3057        | NM_007707    | 0.001083782    | 1.41     | 1.41                | <b>Socs3</b>            | suppressor of cytokine signaling 3                                                                       | 0001666 // response to hypoxia // inferred from electronic annotation // 0001932 // regulation of protein phosphorylation // inferred from direct assay // 0006469 // negative regulation of protein I                |
| 746.323          | 1001.2252       | NM_01024602  | 0.00270068     | 1.41     | 1.41                | <b>Cep170b</b>          | centrosomal protein 170B                                                                                 |                                                                                                                                                                                                                       |
| 146.90018        | 206.62752       | NM_001031516 | 0.007301306    | 1.41     | 1.41                | <b>Steep2</b>           | six transmembrane epithelial antigen of prostate 2                                                       | 0006810 // transport // inferred from electronic annotation // 0006811 // ion transport // inferred from electronic annotation // 0006893 // Golgi to plasma membrane transport // not recorded //                    |
| 373.51614        | 521.92156       | NM_007885    | 4.17E-04       | 1.40     | 1.40                | <b>Slc26a2</b>          | solute carrier family 26 (sulfate transporter), member 2                                                 | 0005150 // ossification // not recorded // 0006810 // transport // inferred from electronic annotation // 0006811 // ion transport // inferred from electronic annotation // 0008272 // sulfate transp                |
| 809.0021         | 1300.971        | NM_009721    | 0.000740000    | 1.40     | 1.40                | <b>Atp2b1</b>           | ATPase, Na+/K+ transporting, beta 1 polypeptide                                                          | 0001666 // response to hypoxia // not recorded // 0001824 // blastocyst development // inferred from mutant phenotype // 0002230 // positive regulation of defense response to virus by host // no                    |
| 3267.633         | 4573.598        | NM_001271538 | 6.07E-04       | 1.40     | 1.40                | <b>Amy1a4</b>           | amylin heavy polypeptide 14                                                                              | 0003009 // skeletal muscle contraction // not recorded // 0007519 // skeletal muscle tissue development // not recorded // 00007605 // sensory perception of sound // not recorded // 0008353 // m                    |
| 420.33865        | 586.3509        | NM_010831    | 0.007045759    | 1.39     | 1.39                | <b>Srk1</b>             | sarfin inducible kinase 1                                                                                | 0000122 // negative regulation of transcription from RNA polymerase II promoter // not recorded // 0002028 // regulation of sodium ion transport // not recorded // 0006468 // protein phosphorylation //             |
| 74.23192         | 103.8791        | NM_001477212 | 0.00285816     | 1.39     | 1.39                | <b>Gsm356</b>           | predicted gene 3556                                                                                      |                                                                                                                                                                                                                       |
| 407.57462        | 567.2956        | NM_183029    | 0.001714329    | 1.39     | 1.39                | <b>Igf2bp2</b>          | insulin-like growth factor 2 mRNA binding protein 2                                                      | 0006417 // regulation of translation // inferred from electronic annotation // 0006810 // transport // inferred from electronic annotation // 0051028 // mRNA transport // inferred from electronic annotation        |
| 161.55202        | 224.64705       | NM_178061    | 0.002905194    | 1.39     | 1.39                | <b>Moab3</b>            | MOB kinase activator 3                                                                                   |                                                                                                                                                                                                                       |

| [CH/HeN, Air][raw] | [CH/HeN, O2][raw] | RefSeq       | Transcript ID | p | FC (Air:O2 at PND5) | Gene Symbol           | Gene Title                                                               | Gene Ontology Biological Process                                                                                                                                                                                                                                                                                                                                                             |
|--------------------|-------------------|--------------|---------------|---|---------------------|-----------------------|--------------------------------------------------------------------------|----------------------------------------------------------------------------------------------------------------------------------------------------------------------------------------------------------------------------------------------------------------------------------------------------------------------------------------------------------------------------------------------|
| 407.10663          | 553.0156          | NM_001033287 |               |   | 0.003309002         | <b>1.36 Ptpn14</b>    | protein tyrosine phosphatase, non-receptor type 14                       | 0001946 // lymphangiogenesis // inferred from mutant phenotype//0001946 // lymphangiogenesis // not recorded//0006353 // transcription, DNA-templated // inferred from electronic annotation                                                                                                                                                                                                 |
| 383.62408          | 520.78455         | NM_001025566 |               |   | 0.001913004         | <b>1.36 Chka</b>      | choline kinase alpha                                                     | 0006580 // ethanolanine metabolic process // inferred from mutant phenotype//0006269 // lipid metabolic process // not recorded// inferred from electronic annotation//0006646 // phosphatidylethanolamine biosynthetic process                                                                                                                                                              |
| 520.5742           | 706.25085         | NM_029166    |               |   | 0.00143661          | <b>1.36 Uhrf1bp1</b>  | UHRF1 (ICBP90) binding protein 1-like                                    |                                                                                                                                                                                                                                                                                                                                                                                              |
| 121.74554          | NM_001001737      |              |               |   | 0.003053795         | <b>1.36 Zfp950</b>    | Zinc finger protein 950                                                  |                                                                                                                                                                                                                                                                                                                                                                                              |
| 20.843884          | 28.194956         | NR_864485    | NR_86448      |   | 0.009262349         | <b>1.36 Mjfae</b>     | predicted gene, 381939                                                   |                                                                                                                                                                                                                                                                                                                                                                                              |
| 101.050804         | 136.6212          |              |               |   | 0.009754568         | <b>1.35 Wt1775</b>    | expressed sequence Wt1775                                                |                                                                                                                                                                                                                                                                                                                                                                                              |
| 348.197            | 469.72803         | NM_010266    |               |   | 0.003637469         | <b>1.35 Gdn</b>       | guanine deaminase                                                        | 0006147 // guanine catabolic process // inferred from electronic annotation//0031116 // positive regulation of microtubule polymerization // not recorded//0046098 // guanine metabolic process                                                                                                                                                                                              |
| 370.55664          | 498.78146         | NR_002853    | NR_0277       |   | 0.007353815         | <b>1.35 Airn</b>      | antisense lgr2r RNA                                                      | 0006349 // regulation of gene expression by genetic imprinting // inferred from mutant phenotype//0051570 // regulation of histone H3-K9 methylation // inferred from mutant phenotype                                                                                                                                                                                                       |
| 68.51983           | 92.09003          | NM_001195617 |               |   | 0.006191571         | <b>1.34 Dcdc2a</b>    | doublecortin domain containing 2a                                        | 0001764 // neuron migration // inferred from genetic interaction//0001764 // neuron migration // not recorded//0007399 // neuron system development // inferred from electronic annotation//0001332 // establishment of mitotic spindle orientation // inferred from genetic interaction//0007275 // multicellular organismal development // inferred from electronic annotation//0007605 // |
| 438.96487          | 589.52893         | NM_011897    |               |   | 0.002410484         | <b>1.34 Spry2</b>     | sprouty homolog 2 (Drosophila)                                           | 0006468 // protein phosphorylation // inferred from electronic annotation//00016310 // phosphorylation // inferred from electronic annotation//0051726 // regulation of cell cycle // inferred from                                                                                                                                                                                          |
| 117.457664         | 157.41004         | NM_001033443 |               |   | 0.008349649         | <b>1.34 Cdk4</b>      | cyclin-dependent kinase-like 4                                           | 0007165 // signal transduction // inferred from electronic annotation//0043547 // positive regulation of GTPase activity // inferred from electronic annotation                                                                                                                                                                                                                              |
| 1129.9148          | 1513.6592         | NM_001099288 |               |   | 0.007812212         | <b>1.34 Arhgap44</b>  | Rho GTPase activating protein 44                                         | 001250 // adaptive immune response // inferred from electronic annotation//0002376 // immune system process // inferred from electronic annotation//0001939 // positive regulation of endothelial cell proliferation // n                                                                                                                                                                    |
| 558.0418           | 747.2911          | NM_133829    | NM_178        |   | 0.001811663         | <b>1.34 Mjfae</b>     | major facilitator superfamily domain containing 6                        | 0006480 // protein glycosylation // inferred from electronic annotation//0006152 // metabolic process // inferred from electronic annotation//0035269 // protein O-linked mannosylation // infer                                                                                                                                                                                             |
| 210.15689          | 280.93929         | NM_001166633 |               |   | 0.006577869         | <b>1.34 Gylt1b</b>    | glycosyltransferase-like 1b                                              | 0000122 // negative regulation of transcription from RNA polymerase II promoter // not recorded//0001122 // negative regulation of transcription from RNA polymerase II prom                                                                                                                                                                                                                 |
| 197.9558           | 264.5334          | NM_001179955 |               |   | 0.007480026         | <b>1.34 Prdm16</b>    | PR domain containing 16                                                  | 0006468 // protein phosphorylation // inferred from electronic annotation//0007399 // nervous system development // inferred from electronic annotation//001242 // negative regulation of me                                                                                                                                                                                                 |
| 406.2252           | 894.3502          | NM_144847    |               |   | 0.001185593         | <b>1.33 Nr3p2</b>     | nuclear receptor binding protein 2                                       | 0006470 // protein dephosphorylation // inferred from electronic annotation//0007185 // transmembrane receptor protein tyrosine phosphatase signaling pathway // inferred from direct assay//                                                                                                                                                                                                |
| 27.39146           | 36.46692          |              |               |   | 0.007256189         | <b>1.33 AU015536</b>  | expressed sequence AU015536                                              | 0007018 // microtubule-based movement // not recorded//0008152 // metabolic process // inferred from electronic annotation                                                                                                                                                                                                                                                                   |
| 356.23785          | 474.2256          | NM_001316678 |               |   | 0.006101126         | <b>1.33 Ptpre</b>     | protein tyrosine phosphatase, receptor type, E                           | 0000165 // MAPK cascade // inferred from physical interaction//0006470 // protein dephosphorylation // inferred from electronic annotation//0001778 // transmembrane receptor protein serine                                                                                                                                                                                                 |
| 256.62045          | 341.09824         | NM_001109040 |               |   | 0.003957991         | <b>1.33 Kif21a</b>    | kinasin family member 21A                                                | 0001503 // ossification // inferred from electronic annotation//0001525 // angiogenesis // inferred from electronic annotation//0001939 // positive regulation of endothelial cell proliferation // n                                                                                                                                                                                        |
| 356.75464          | 473.79205         | NM_178726    |               |   | 0.002081277         | <b>1.33 Ppm1l</b>     | protein phosphatase 1 (formerly 2C)-like                                 | 0001934 // positive regulation of protein phosphorylation // not recorded//0002029 // desensitization of G-protein coupled receptor protein signaling pathway // not recorded//0006468 // prot                                                                                                                                                                                               |
| 1518.4796          | 2014.3811         | NM_001252553 |               |   | 0.0035598545        | <b>1.33 Ecn1</b>      | extracellular matrix protein 1                                           | 0006351 // transcription, DNA-templated // inferred from electronic annotation//0006355 // regulation of transcription, DNA-templated // inferred from electronic annotation//0006974 // cellu                                                                                                                                                                                               |
| 398.76205          | 528.15375         | NM_001035531 |               |   | 0.004632358         | <b>1.33 Adibr2</b>    | adrenergic receptor kinase, beta 2                                       | 0000122 // negative regulation of transcription from RNA polymerase II promoter // not recorded//0006351 // transcription, DNA-templated // inferred from electronic annotation//0006355 // re                                                                                                                                                                                               |
| 406.8077           | 64.69279          | NM_008719    |               |   | 0.007165891         | <b>1.33 Npas2</b>     | neuronal PAS domain protein 2                                            | 0007015 // actin filament organization // inferred from mutant phenotype//0007155 // cell adhesion // inferred from electronic annotation//0007156 // homophilic cell adhesion via plasma mem                                                                                                                                                                                                |
| 810.3151           | 1070.7461         | NM_130779    |               |   | 0.0019197171        | <b>1.33 Wwv1</b>      | WW, C2 and coiled-coil domain containing 1                               | 0006486 // protein glycosylation // not recorded//0007179 // transforming growth factor beta receptor signaling pathway // inferred from mutant phenotype//0007179 // transforming grow                                                                                                                                                                                                      |
| 4760.889           | 6282.781          | NM_001081286 |               |   | 0.004660445         | <b>1.33 Fcrl1</b>     | FAT tumor suppressor homolog 1 (Drosophila)                              | 0003286 // glomerular basement membrane development // inferred from mutant phenotype//0032836 // glomerular basement membrane development // not recorded                                                                                                                                                                                                                                   |
| 203.83978          | 268.46323         | NM_008105    | NM_0238       |   | 0.001016067         | <b>1.33 Gcmt2</b>     | glucosaminyl (N-acetyl) transferase 2, l-branching enzyme                | 0001525 // angiogenesis // inferred from electronic annotation//0007175 // neural crest cell migration // inferred from mutant phenotype//0001764 // neuron migration // inferred from mutant                                                                                                                                                                                                |
| 2637.189           | 3470.8955         | NM_007735    | NM_0111       |   | 0.009288732         | <b>1.33 Col4a4</b>    | collagen, type IV, alpha 4                                               | 0000122 // negative regulation of transcription from RNA polymerase II promoter // not recorded//0001837 // epithelial to mesenchymal transition // inferred from sequence or structural similarit                                                                                                                                                                                           |
| 983.2645           | 1293.6791         | NM_001077403 |               |   | 0.009066828         | <b>1.33 Nr2p</b>      | neuropilin 2                                                             | 0006974 // cellular response to DNA damage stimulus // not recorded//0008219 // cell death // not recorded                                                                                                                                                                                                                                                                                   |
| 167.76083          | 220.68974         | NM_010441    |               |   | 0.007354527         | <b>1.33 Hmg2p</b>     | high mobility group AT-hook 2                                            | 0010628 // positive regulation of gene expression // not recorded//0031032 // actomyosin structure organization // not recorded//0042060 // wound healing // not recorded//0045785 // posit                                                                                                                                                                                                  |
| 995.9826           | 1295.6543         | NM_001292419 |               |   | 0.009746431         | <b>1.31 Susd6</b>     | sushi domain containing 6                                                | 000810 // transport // inferred from electronic annotation//0006899 // lipid transport // inferred from electronic annotation                                                                                                                                                                                                                                                                |
| 322.6954           | 423.25653         | NM_019427    |               |   | 0.003100493         | <b>1.31 Epsb144b</b>  | erythrocyte membrane protein band 4.1 like 4b                            | 0001701 // in utero embryonic development // inferred from genetic interaction//0006351 // transcription, DNA-templated // inferred from electronic annotation//0006355 // regulation of trans                                                                                                                                                                                               |
| 131.23123          | 172.09679         | NM_001290733 |               |   | 0.006146731         | <b>1.31 Osbpl6</b>    | oxysterol binding protein-like 6                                         | 0006810 // transport // inferred from electronic annotation//000811 // ion transport // inferred from electronic annotation//00015746 // citrate transport // not recorded//0034220 // ion tra                                                                                                                                                                                               |
| 500.67035          | 656.1234          | NM_010756    |               |   | 0.004947939         | <b>1.31 Mjof</b>      | v-maf musculoaponeurotic fibrosarcoma oncogene family, protein G (avian) | 0001666 // response to hypoxia // inferred from electronic annotation//0007623 // circadian rhythm // inferred from electronic annotation//0009725 // response to hormone // inferred from ele                                                                                                                                                                                               |
| 132.92372          | 173.78185         | NM_178639    |               |   | 0.005445516         | <b>1.31 Sfn5s</b>     | serfatelin 5                                                             | 0006810 // transport // inferred from electronic annotation//0006869 // lipid transport // inferred from electronic annotation//0008152 // metabolic process // inferred from electronic annotation                                                                                                                                                                                          |
| 6080.784           | 7945.0317         | NM_023134    |               |   | 0.00609484          | <b>1.31 Sftpa1</b>    | surfactant associated protein 1A                                         | 0007155 // cell adhesion // inferred from electronic annotation//0007156 // homophilic cell adhesion via plasma membrane adhesion molecules // inferred from mutant phenotype//0007157 // h                                                                                                                                                                                                  |
| 221.80902          | 289.80542         | NM_207202    |               |   | 0.004484124         | <b>1.31 Ccdc120</b>   | coiled-coil domain containing 120                                        | 0000122 // negative regulation of transcription from RNA polymerase II promoter // inferred from direct assay//0001706 // endoderm formation // not recorded//0001714 // endodermal cell fate                                                                                                                                                                                                |
| 2038.3118          | 2720.7524         | NM_001293667 |               |   | 0.001472988         | <b>1.31 Atp11a</b>    | ATPase, class VI, type 11A                                               | 0006470 // protein dephosphorylation // inferred from electronic annotation                                                                                                                                                                                                                                                                                                                  |
| 437.01465          | 570.63116         | NM_001057784 |               |   | 0.003554036         | <b>1.31 Inad1</b>     | InaD-like (Drosophila)                                                   | 0001022 // negative regulation of transcription from RNA polymerase II promoter // not recorded//0006351 // transcription, DNA-templated // inferred from electronic annotation//0006355 // res                                                                                                                                                                                              |
| 335.82             | 438.40463         | NM_008478    |               |   | 0.00742429          | <b>1.31 L1cam</b>     | L1 cell adhesion molecule                                                | 0007155 // cell adhesion // inferred from electronic annotation//0007156 // homophilic cell adhesion via plasma membrane adhesion molecules // inferred from mutant phenotype//0007157 // h                                                                                                                                                                                                  |
| 250.2933           | 324.36548         | NM_177721    |               |   | 0.007636873         | <b>1.30 Soma5</b>     | sterile alpha motif domain containing 5                                  | 0000122 // negative regulation of transcription from RNA polymerase II promoter // inferred from direct assay//0001706 // endoderm formation // not recorded//0001714 // endodermal cell fate                                                                                                                                                                                                |
| 107.44085          | 140.06169         | NM_001291268 |               |   | 0.008189959         | <b>1.30 Hnf1b</b>     | HNFI homeobox B                                                          | 0006470 // protein dephosphorylation // inferred from electronic annotation                                                                                                                                                                                                                                                                                                                  |
| 230.51567          | 300.45352         | NM_001101218 |               |   | 0.008262175         | <b>1.30 Ppm1h</b>     | protein phosphatase 1H (PP2C domain containing)                          | 0001022 // negative regulation of transcription from RNA polymerase II promoter // inferred from mutant phenotype//000122 // negative regulation of transcription from RNA polymerase II prom                                                                                                                                                                                                |
| 1509.2809          | 1961.9949         | NM_008259    |               |   | 0.005939459         | <b>1.30 Fxh1</b>      | forkhead box A1                                                          | 0006198 // cAMP catabolic process // inferred from electronic annotation//0007165 // signal transduction // inferred from electronic annotation//0008152 // metabolic process // inferred from e                                                                                                                                                                                             |
| 401.71042          | 521.7765          | NM_00112759  |               |   | 0.003972929         | <b>1.30 Pde7a</b>     | phosphodiesterase 7A                                                     | 0022409 // positive regulation of cell-cell adhesion // inferred from mutant phenotype//0043087 // regulation of GTPase activity // not recorded//0043547 // positive regulation of GTPase activity                                                                                                                                                                                          |
| 287.8727           | 373.5391          | NM_001081355 |               |   | 0.008889131         | <b>1.30 Rap2ap3</b>   | Rap2 GTPase-activating protein                                           | 0006468 // protein phosphorylation // not recorded//0006915 // apoptotic process // inferred from electronic annotation//0035310 // phosphorylation // inferred from electronic annotation//0                                                                                                                                                                                                |
| 403.9457           | 520.9204          | NM_001057784 |               |   | 0.003554036         | <b>1.30 Inad1</b>     | InaD-like (Drosophila)                                                   | 0007165 // signal transduction // inferred from electronic annotation//0009314 // response to radiation // not recorded//0010286 // heat acclimation // not recorded//0001921 // cytokine-med                                                                                                                                                                                                |
| 939.82996          | 1126.3904         | NM_001123382 |               |   | 0.002127687         | <b>1.30 Htr1</b>      | interleukin 1 receptor, type 1                                           | 0006500 // proteolysis // inferred from electronic annotation//0008989 // immune-mediated endocytosis // inferred from electronic annotation//0009655 // immune response // inferred from el                                                                                                                                                                                                 |
| 1528.3681          | 1977.9941         | NM_001168333 |               |   | 0.002030536         | <b>1.30 Tinsg1</b>    | tubulin-interstitial nephritis antigen-like 1                            | 0006355 // regulation of transcription, DNA-templated // inferred from electronic annotation//0008340 // determination of adult lifespan // inferred from mutant phenotype//0032355 // respons                                                                                                                                                                                               |
| 361.6311           | 468.0062          | NM_001081355 |               |   | 0.003970692         | <b>1.30 Prdm2</b>     | PR domain containing 2, with ZNF domain                                  | 0006874 // cellular calcium ion homeostasis // inferred from genetic interaction//0036092 // phosphatidylinositol-3-phosphate biosynthetic process // not recorded//0004567 // negative regulati                                                                                                                                                                                             |
| 185.50215          | 239.77614         | NM_001024617 |               |   | 0.007355195         | <b>1.29 Inpp4b</b>    | inositol polyphosphate 4-phosphatase, type II                            | 0000432 // positive regulation of transcription from RNA polymerase II promoter by glucose // inferred from direct assay//0000433 // negative regulation of transcription from RNA polymerase II p                                                                                                                                                                                           |
| 1603.2427          | 2070.9624         | NM_001291065 |               |   | 0.007149878         | <b>1.29 Foxa2</b>     | forkhead box A2                                                          | 0000122 // negative regulation of transcription from RNA polymerase II promoter // not recorded//0001525 // angiogenesis // inferred from direct assay//0001525 // angiogenesis // inferred fr                                                                                                                                                                                               |
| 1170.4575          | 2207.7852         | NM_001025250 |               |   | 0.002878465         | <b>1.29 Vegfa</b>     | vascular endothelial growth factor A                                     | 0001764 // neuronal migration // not recorded//0006468 // protein phosphorylation // inferred from electronic annotation//0016310 // phosphorylation // inferred from electronic annotation//0                                                                                                                                                                                               |
| 592.0897           | 763.7925          | NM_001024624 |               |   | 0.00146201          | <b>1.29 Cdk5</b>      | cyclin-dependent kinase-like 5                                           | 0003197 // endocardial cushion development // inferred from mutant phenotype//0006468 // protein phosphorylation // inferred from electronic annotation//0007162 // negative regulation of c                                                                                                                                                                                                 |
| 466.96338          | 602.07007         | NM_010153    |               |   | 0.003649187         | <b>1.29 Erb3</b>      | v-erb-b2 erythroblastic leukemia viral oncogene homolog 3 (avian)        | 0000122 // negative regulation of transcription from RNA polymerase II promoter // not recorded//0000122 // negative regulation of transcription from RNA polymerase II prom                                                                                                                                                                                                                 |
| 945.8543           | 1218.3705         | NM_011756    |               |   | 0.001165486         | <b>1.29 Zfp36</b>     | zinc finger protein 36                                                   | 0001525 // angiogenesis // inferred from direct assay//0001942 // hair follicle development // inferred from mutant phenotype//0002053 // positive regulation of mesenchymal cell proliferation,                                                                                                                                                                                             |
| 28.196205          | 36.27247          |              |               |   | 0.007101238         | <b>1.29 Dfcr5d58e</b> | DNA segment, chr 7, ERATO D01_58, expressed                              | 0006810 // transport // inferred from electronic annotation//0006820 // anion transport // not recorded//0035435 // phosphate ion transmembrane transport // --//0050602 // phosphate ion t                                                                                                                                                                                                  |
| 2222.579           | 2858.4988         | NM_008080    |               |   | 0.001829359         | <b>1.29 Ptpn22</b>    | platelet derived growth factor receptor tyrosine phosphatase 22          | 0006082 // organic acid metabolic process // not recorded//0006803 // NADP metabolic process // not recorded//0006803 // xenobiotic metabolic process // not recorded//0009404 // toxin me                                                                                                                                                                                                   |
| 330.54477          | 424.83102         | NM_001242427 |               |   | 0.001493512         | <b>1.29 Slc37a1</b>   | solute carrier family 37 (glycerol-3-phosphate transporter), member 1    | 0001656 // metanephros development // inferred from mutant phenotype//0001656 // metanephros development // traceable author statement//0001658 // branching involved in ureteric bud r                                                                                                                                                                                                      |
| 1006.2722          | 1292.6781         | NM_018881    |               |   | 0.004505317         | <b>1.28 Fmo2</b>      | flavin containing monooxygenase 2                                        | 0007155 // cell adhesion // inferred from electronic annotation//0007157 // heterophilic cell-cell adhesion via plasma membrane cell adhesion molecules // inferred from sequence or structural sin                                                                                                                                                                                          |
| 278.695            | 357.85294         | NM_009523    |               |   | 0.002435394         | <b>1.28 Wnt4</b>      | wingless-type MMTV integration site family, member 4                     | 0006810 // transport // inferred from electronic annotation                                                                                                                                                                                                                                                                                                                                  |
| 2445.0894          | 3135.405          | NM_009655    |               |   | 0.006525636         | <b>1.28 Aicm</b>      | activated leukocyte cell adhesion molecule                               | 0006810 // transport // inferred from electronic annotation                                                                                                                                                                                                                                                                                                                                  |
| 292.50104          | 374.82904         | NM_146013    |               |   | 0.004768179         | <b>1.28 Sec14</b>     | SEC14-like lipid binding 4                                               | 0006810 // transport // inferred from electronic annotation//0015031 // protein transport // inferred from electronic annotation//0016567 // protein ubiquitination // inferred from direct assay                                                                                                                                                                                            |
| 1497.366           | 1916.3384         | NM_001285870 |               |   | 0.004520725         | <b>1.28 Trim3</b>     | tripartite motif-containing 3                                            | 0032386 // regulation of intracellular transport // inferred from direct assay                                                                                                                                                                                                                                                                                                               |
| 210.75037          | 269.5759          | NM_001204931 |               |   | 0.003290566         | <b>1.28 Reep6</b>     | receptor accessory protein 6                                             | 0003435 // procardiac cell migration involved in pericardium morphogenesis // inferred from mutant phenotype//0007155 // cell adhesion // inferred from electronic annotation//0007275 //                                                                                                                                                                                                    |
| 166.97786          | 213.40076         | XR_379375    | XR_40567      |   | 0.004812483         | <b>1.28 Gm32819</b>   | predicted gene, 32819                                                    | 0006810 // transport // inferred from electronic annotation//0006886 // intracellular protein transport // not recorded//0006904 // vesicle docking involved in exocytosis // not recorded//0007,                                                                                                                                                                                            |
| 1200.5897          | 1593.7145         | NM_001172160 |               |   | 0.001586058         | <b>1.28 Firt3</b>     | fibronectin leucine rich transmembrane protein 3                         | 0007165 // signal transduction // inferred from electronic annotation//0007175 // negative regulation of epidermal growth factor-activated receptor activity // inferred from mutant phenotype//0                                                                                                                                                                                            |
| 32.180107          | 41.09088          | NM_023852    |               |   | 0.007803954         | <b>1.28 Rab3c</b>     | RAB3C, member RAS oncogene family                                        | 0010224 // response to UV-B // inferred from electronic annotation//0018149 // peptide cross-linking // inferred from electronic annotation//0018153 // peptide cross-linking via NG-1 (L-isoletu)                                                                                                                                                                                           |
| 1913.2311          | 2440.413          | NM_181444    |               |   | 0.002394067         | <b>1.28 Gprc5a</b>    | G protein-coupled receptor, family G, group 5, member A                  | 0006954 // inflammatory response // inferred from genetic interaction//0007166 // cell surface receptor signaling pathway // not recorded//0007420 // brain development // inferred from electr                                                                                                                                                                                              |
| 41.73875           | 53.2297           | NM_008412    |               |   | 0.004702997         | <b>1.28 Ivi</b>       | involucrin                                                               | 0006810 // transport // inferred from electronic annotation//0006810 // transport // inferred from electronic annotation//0006887 // exocytosis // not recorded//0006893 // Golgi to plasma membrane tra                                                                                                                                                                                     |
| 846.31726          | 1077.7935         | NM_001243132 |               |   | 0.003912692         | <b>1.27 Tspan2</b>    | tetraspanin 2                                                            | 0001881 // lipid metabolic process // not recorded//0006655 // phosphatidylglycerol biosynthetic process // inferred from sequence or structural similarity//0006655 // ph                                                                                                                                                                                                                   |
| 381.76462          | 479.6195          | NM_001109975 |               |   | 0.001572782         | <b>1.27 Smpg3</b>     | small GTP-binding protein kinase kinase kinase 9                         | 0003085 // cortical cytoskeleton organization // not traceable author statement//0032233 // positive regulation of actin filament bundle assembly // inferred from direct assay//0051492 // regul                                                                                                                                                                                            |
| 2057.0906          | 2611.735          | NM_201529    |               |   | 0.002841721         | <b>1.27 Lmo7</b>      | LIM domain only 7                                                        | 0007015 // actin filament organization // inferred from physical interaction//0010976 // positive regulation of neuron projection development // not recorded//0019722 // calcium-mediated sig                                                                                                                                                                                               |
| 1569.542           | 1992.6072         | NM_001034851 |               |   | 0.003107579         | <b>1.27 Fom134b</b>   | FYF domain-containing ion transport regulator 5                          | 0006810 // transport // inferred from electronic annotation//0006811 // ion transport // inferred from electronic annotation//0034320 // ion transmembrane transport // inferred from electronic                                                                                                                                                                                             |
| 57.509842          | 73.08081          | NM_001162970 |               |   | 0.002583854         | <b>1.27 Aim1</b>      | absent in melanoma 1-like                                                | 0006355 // regulation of transcription, DNA-templated // not recorded                                                                                                                                                                                                                                                                                                                        |
| 70.0157            | 925.0214          | NM_173038    |               |   | 0.003904908         | <b>1.27 Tbccl</b>     | tubulin folding cofactor E-like                                          | 0001541 // ovarian follicle development // inferred from electronic annotation//0001666 // response to hypoxia // inferred from electronic annotation//0001975 // response to amphetamine // si                                                                                                                                                                                              |
| 632.7603           | 801.61237         | NM_00        |               |   |                     |                       |                                                                          |                                                                                                                                                                                                                                                                                                                                                                                              |

| [CH/HeN, Air][raw] | [CH/HeN, O2][raw] | RefSeq               | Transcript ID | p            | FC (Air:O2 at PND5) | Gene Symbol         | Gene Title                                                                                 | Gene Ontology Biological Process                                                                                                                                                                              |
|--------------------|-------------------|----------------------|---------------|--------------|---------------------|---------------------|--------------------------------------------------------------------------------------------|---------------------------------------------------------------------------------------------------------------------------------------------------------------------------------------------------------------|
| 789.1126           | 985.4984          | NM_008654            |               | 0.005799206  | 1.25                | <b>Ppp1r15a</b>     | protein phosphatase 1, regulatory (inhibitor) subunit 15A                                  | 0006417 // regulation of translation // inferred from electronic annotation//0006915 // apoptotic process // inferred from electronic annotation//0010628 // positive regulation of gene expression           |
| 950.3166           | 1186.4846         | NM_001038643//NM..L  |               | 0.020910278  | 1.25                | <b>Sclca3a1</b>     | solute carrier organic anion transporter family, member 3a1                                | 0006810 // regulation of transport // inferred from electronic annotation//0006811 // ion transport // inferred from electronic annotation//0006857 // oligopeptide transport // not recorded//0015711 // org |
| 8145.351           | 10165.925         | NM_001029937//NM..L  |               | 0.009392737  | 1.25                | <b>Sect14c</b>      | SECT14-like ligand binding 3                                                               | 0006810 // transport // inferred from electronic annotation                                                                                                                                                   |
| 275.76782          | 343.7545          | NM_029291//NM..006E  |               | 0.006149239  | 1.25                | <b>Ausc2</b>        | actin-binding signal coligurator 1 complex subunit 2                                       | 0006351 // transcription, DNA-templated // inferred from electronic annotation//0006355 // regulation of transcription, DNA-templated // inferred from electronic annotation                                  |
| 452.89276          | 564.2718          | NM_001034030//NM..L  |               | 0.008969214  | 1.25                | <b>Limk2</b>        | lim motif-containing protein kinase 2                                                      | 0006468 // protein phosphorylation // inferred from mutant phenotype//0006468 // protein phosphorylation // not recorded//0007283 // spermatogenesis // inferred from mutant phenotype//                      |
| 218.59479          | 272.117           | NM_183183//NM..006E  |               | 0.006962176  | 1.24                | <b>Gprin3</b>       | GPRIN family member 3                                                                      | 0000082 // G1/S transition of mitotic cell cycle // inferred from mutant phenotype//0001975 // response to amphetamine // inferred from electronic annotation//0006470 // protein dephosphorylation           |
| 1687.3281          | 2099.2078         | NM_001293622//NM..L  |               | 0.005596881  | 1.24                | <b>Ppp3ca</b>       | protein phosphatase 3, catalytic subunit, alpha isoform                                    | 0000082 // G1/S transition of mitotic cell cycle // inferred from mutant phenotype//0001975 // response to amphetamine // inferred from electronic annotation//0006470 // protein dephosphorylation           |
| 1279.319           | 1591.5577         | NM_001028591//NM..L  |               | 0.005087391  | 1.24                | <b>Dapk1</b>        | dact associated protein kinase 1                                                           | 0006417 // regulation of translation // inferred from electronic annotation//0006468 // protein phosphorylation // inferred from direct assay//0006468 // protein phosphorylation // not recorded             |
| 248.21167          | 308.5953          | NM_053169//NM..006E  |               | 0.006915159  | 1.24                | <b>Trim16</b>       | tripartite motif-containing 16                                                             | 0043966 // histone H3 acetylation // not recorded//0043967 // histone H4 acetylation // not recorded//0045618 // positive regulation of keratinocyte differentiation // not recorded//0045893 //              |
| 3122.544           | 3877.6018         | NM_0115195           |               | 0.007898194  | 1.24                | <b>Timp3</b>        | tissue inhibitor of metalloproteinase 3                                                    | 0007417 // central nervous system development // inferred from electronic annotation//0007568 // aging // inferred from electronic annotation//0009612 // response to mechanical stimulus // i                |
| 338.4052           | 420.1267          | NM_007514            |               | 0.006594795  | 1.24                | <b>Pvr</b>          | poliovirus receptor                                                                        | 0002860 // positive regulation of natural killer cell mediated cytotoxicity directed against tumor cell target // --//0007156 // homophilic cell adhesion via plasma membrane adhesion molecules // i         |
| 548.4758           | 680.0645          | NM_001039181//NM..L  |               | 0.006998207  | 1.24                | <b>Npr3</b>         | natriuretic peptide receptor 3                                                             | 0001501 // skeletal system development // inferred from direct assay//0001501 // skeletal system development // inferred from mutant phenotype//0002158 // osteoclast proliferation // inferred               |
| 3529.805           | 4353.9326         | NM_001305440//NM..L  |               | 0.0009559083 | 1.23                | <b>Spry1</b>        | CCAT/enhancer binding protein (C/EBP), alpha                                               | 0003133 // establishment of mitotic spindle orientation // inferred from genetic interaction//0001656 // melanophos development // inferred from genetic interaction//0001657 // uretic bud                   |
| 400.3698           | 493.3865          | NM_0007885//NM..011L |               | 0.008344945  | 1.23                | <b>Dlit1</b>        | delta-like 1 (Drosophila)                                                                  | 0001701 // in utero embryonic development // non-traceable author statement//0001705 // somitogenesis // inferred from genetic interaction//0001756 // somitogenesis // inferred from mutant                  |
| 1782.3717          | 2194.9504         | NM_001004468//NM..L  |               | 0.003032173  | 1.23                | <b>Tacc2</b>        | transforming, acidic coiled-coil containing protein 2                                      | 0000226 // microtubule cytoskeleton organization // inferred from mutant phenotype//0008283 // cell proliferation // inferred from mutant phenotype//0021987 // cerebral cortex development                   |
| 381.49026          | 469.6352          | NM_001253866//NM..L  |               | 0.008596059  | 1.23                | <b>Serin2</b>       | serine incorporator 2                                                                      | 0006658 // phosphatidylycerol metabolic process // not recorded//0006665 // sphingolipid metabolic process // inferred from electronic annotation//0015825 // L-serine transport // not record                |
| 184.15356          | 225.44762         | NM_001163749//NM..L  |               | 0.00960717   | 1.23                | <b>Camsap3</b>      | calmodulin regulated spectrin-associated protein family, member 3                          | 0000226 // microtubule cytoskeleton organization // not recorded//0010923 // negative regulation of phosphatase activity // not recorded//0031175 // neuron projection development // inferred                |
| 71.19115           | 87.00784          | NM_175666            |               | 0.008873613  | 1.22                | <b>Hist2h2bb</b>    | histone cluster 2, H2bb                                                                    | 0006334 // nucleosome assembly // not recorded                                                                                                                                                                |
| 503.03867          | 613.9215          | NM_007711//NM..L73b  |               | 0.002525878  | 1.22                | <b>Cln3</b>         | chloride channel, voltage-sensitive 3                                                      | 0006810 // transport // inferred from electronic annotation//0006811 // ion transport // not recorded//0006821 // chloride transport // not recorded//0006911 // phagocytosis, engulfment // i                |
| 2445.0586          | 2974.7217         | NM_001161413//NM..L  |               | 0.006994822  | 1.22                | <b>Slc3a2</b>       | solute carrier family 3 (activators of dibasic and neutral amino acid transport), member 2 | 0005975 // carbohydrate metabolic process // inferred from electronic annotation//0006810 // transport // inferred from electronic annotation//0006865 // amino acid transport // inferred from               |
| 1279.4628          | 1555.5124         | NM_00128754//NM..L   |               | 0.0005531842 | 1.22                | <b>Ccpgp</b>        | CCAAT/enhancer binding protein (C/EBP), alpha                                              | 0000050 // urec cycle // inferred from direct assay//0000122 // negative regulation of transcription from RNA polymerase II promoter // inferred from direct assay//0001889 // liver development              |
| 429.69196          | 521.9765          | NM_001162375//NM..L  |               | 0.007404229  | 1.21                | <b>Fam73a</b>       | family with sequence similarity 73, member A                                               | 0000050 // urec cycle // inferred from direct assay//0000122 // negative regulation of transcription from RNA polymerase II promoter // inferred from direct assay//0001889 // liver development              |
| 1259.392           | 1529.7999         | NM_011803            |               | 0.006202603  | 1.21                | <b>Klf6</b>         | Kruppel-like factor 6                                                                      | 0006351 // transcription, DNA-templated // inferred from electronic annotation//0006355 // regulation of transcription, DNA-templated // inferred from electronic annotation//0019221 // cytoki               |
| 1826.7445          | 2217.0193         | NM_001081274//NM..L  |               | 0.006474663  | 1.21                | <b>Pgd</b>          | phosphogluconate dehydrogenase                                                             | 0005975 // carbohydrate metabolic process // not recorded//0006098 // pentose-phosphate shunt // not recorded//0006739 // NADP metabolic process // not recorded//0009051 // pentose-ph                       |
| 1324.7793          | 1760.9137         | NM_007734            |               | 0.007148852  | 1.21                | <b>Cc1a3</b>        | collagen, type IV, alpha 3                                                                 | 0006019 // activation of cysteine-type endopeptidase activity involved in apoptosis process // not recorded//0007155 // cell adhesion // inferred from electronic annotation//0007166 // cell surfa           |
| 555.607            | 672.00195         | NM_0295008//NM..006E |               | 0.007366358  | 1.21                | <b>Pcgef5</b>       | polycomb group ring finger 5                                                               | 0006351 // transcription, DNA-templated // inferred from electronic annotation//0006355 // regulation of transcription, DNA-templated // inferred from electronic annotation//0005494 // posit                |
| 142.42418          | 172.15913         | NM_031880//NM..006E  |               | 0.007749506  | 1.21                | <b>Tnk1</b>         | tyrosine kinase, non-receptor, 1                                                           | 0006468 // protein phosphorylation // inferred from electronic annotation//0007169 // transmembrane receptor protein tyrosine kinase signaling pathway // not recorded//0016310 // phosphor                   |
| 33.161358          | 40.02322          | NM_001164767//NM..L  |               | 0.008009913  | 1.21                | <b>Robo3</b>        | roundabout homolog 3 (Drosophila)                                                          | 00001764 // neuron migration // inferred from mutant phenotype//0006935 // chemotaxis // inferred from electronic annotation//0007275 // multicellular organismal development // inferred fr                  |
| 471.20993          | 586.0679          | NM_00131358//NM..L   |               | 0.004545672  | 1.21                | <b>Ej2a3</b>        | eukaryotic translation initiation factor 2 alpha kinase 3                                  | 0001501 // skeletal system development // inferred from mutant phenotype//0001503 // ossification // not recorded//0001525 // angiogenesis // not recorded//0020263 // chondrocyte develop                    |
| 927.7281           | 1152.0266         | NM_153389//NR..0039  |               | 0.006121195  | 1.20                | <b>Atp10d</b>       | ATPase, class V, type 10D                                                                  | 0006810 // transport // inferred from electronic annotation//0006812 // cation transport // non-traceable author statement//0006859 // lipid transport // inferred from electronic annotation//               |
| 437.2646           | 523.69025         | NM_001159394//NM..L  |               | 0.008714629  | 1.20                | <b>Nfkbiu</b>       | nuclear factor of kappa light polypeptide gene enhancer in B cells inhibitor, zeta         | 0006351 // transcription, DNA-templated // inferred from electronic annotation//0006355 // regulation of transcription, DNA-templated // inferred from electronic annotation//0006357 // regula               |
| 1793.3213          | 2147.0642         | NM_001166408//NM..L  |               | 0.008957124  | 1.20                | <b>Ra14</b>         | retic acid induced factor 14                                                               | 0000082 // G1/S transition of mitotic cell cycle // inferred from mutant phenotype//0001975 // response to amphetamine // inferred from electronic annotation//0006470 // protein dephosphorylation           |
| 474.6698           | 567.26447         | NM_001038602//NM..L  |               | 0.007153812  | 1.20                | <b>Marvel2</b>      | MARVEL (membrane-associating) domain containing 2                                          | 0007605 // sensory perception of sound // inferred from mutant phenotype//0007605 // sensory perception of sound // not recorded//0045216 // cell-cell junction organization // inferred from n               |
| 4808.496           | 5742.4917         | NM_033073            |               | 0.007291713  | 1.19                | <b>Krt7</b>         | keratin 7                                                                                  | 0000122 // negative regulation of transcription from RNA polymerase II promoter // not recorded//0006351 // transcription, DNA-templated // inferred from mutant phenotype//0006355 // regu                   |
| 2655.6184          | 3164.502          | NM_010637            |               | 0.00802799   | 1.19                | <b>Klf4</b>         | Kruppel-like factor 4 (gut)                                                                | 0007155 // cell adhesion // inferred from electronic annotation//0007165 // signal transduction // inferred from electronic annotation//0007165 // signal transduction // --//0007229 // integrin             |
| 2308.3855          | 2740.9998         | NM_0105811//NM..006E |               | 0.007570742  | 1.19                | <b>CC47</b>         | CD47 antigen (RH-related integrin, integrin-associated signal transducer)                  | 0000122 // negative regulation of transcription from RNA polymerase II promoter // not recorded//0006351 // transcription, DNA-templated // inferred from mutant phenotype//0006355 // regu                   |
| 1005.0988          | 1191.934          | NM_133791            |               | 0.009684668  | 1.19                | <b>Wwc2</b>         | WW, C2 and coiled-coil domain containing 2                                                 | 0000122 // negative regulation of transcription from RNA polymerase II promoter // not recorded//0003331 // negative regulation of hippo signaling // not recorded//0046623 // negative regulat               |
| 206.99976          | 24.8089792        | NR_065726            |               | 0.004247976  | 1.18                | <b>LOC105244007</b> | uncharacterized LOC105244007                                                               | 0007275 // multicellular organismal development // inferred from electronic annotation//0007283 // spermatogenesis // inferred from electronic annotation//0030154 // cell differentiation // int             |
| 233.1591           | 205.92485         | NM_001163511//NM..L  |               | 0.009366385  | 1.18                | <b>Spot5s</b>       | spermatogenesis associated 5                                                               | 0002866 // positive regulation of acute inflammatory response to antigenic stimulus // not recorded//0007165 // signal transduction // inferred from electronic annotation//0007186 // G-protein              |
| 147.00795          | 129.42291         | NM_007726//NM..006E  |               | 0.009855953  | 1.18                | <b>Cnr1</b>         | cannabinoid receptor 1 (brain)                                                             | 0008544 // epidermis development // inferred from electronic annotation//0018149 // peptide cross-linking // not recorded//0030216 // keratinocyte differentiation // not recorded                            |
| 252.76439          | 220.2298          | NM_133677//NR..00279 |               | 0.008649599  | 1.18                | <b>Zbtb11a1</b>     | zinc finger and BTB domain containing 11, opposite strand 1                                | 0007162 // negative regulation of cell adhesion // inferred from genetic interaction                                                                                                                          |
| 248.4654           | 216.06413         | NM_033175            |               | 0.006386783  | 1.18                | <b>Lce3c</b>        | late cornified envelope 3C                                                                 | 0005894 // male gonad development // inferred from expression pattern//0008585 // female gonad development // inferred from expression pattern                                                                |
| 184.01167          | 159.92508         | NM_023844//NM..006E  |               | 0.007789469  | 1.18                | <b>Jam2</b>         | junction adhesion molecule 2                                                               | 0000122 // negative regulation of transcription from RNA polymerase II promoter // inferred from direct assay//0000122 // negative regulation of transcription from RNA polymerase II promoter // i           |
| 115.64928          | 100.45263         | NM_009936//NM..006E  |               | 0.009519205  | 1.18                | <b>Oa9a</b>         | collagen, type IX, alpha 3                                                                 | 0006281 // DNA repair // inferred from electronic annotation//0006310 // DNA recombination // inferred from physical interaction//0006974 // cellular response to DNA damage stimulus // infer                |
| 186.73788          | 161.4204          | NM_011764//NM..006E  |               | 0.009554279  | 1.18                | <b>Zfp90</b>        | zinc finger protein 90                                                                     | 0002376 // immune system process // inferred from electronic annotation//0002504 // antigen processing and presentation of peptide or polysaccharide antigen via MHC class II // inferred from el             |
| 178.89636          | 154.15787         | NM_010835            |               | 0.005008502  | 1.18                | <b>Nfix1</b>        | nif-1 homeobox 1                                                                           | 0007165 // signal transduction // inferred from electronic annotation//0007186 // G-protein coupled receptor signaling pathway // not recorded                                                                |
| 263.56796          | 216.98973         | NM_177857//NM..006E  |               | 0.009853996  | 1.18                | <b>Denn2c2</b>      | DENM/MADD domain containing 2C                                                             | 0002329 // pre-B cell differentiation // inferred from mutant phenotype//0006810 // transport // inferred from electronic annotation//0006811 // ion transport // inferred from electronic annota             |
| 395.6713           | 304.30524         | NM_0090113//NM..006E |               | 0.006633704  | 1.18                | <b>Rads1a1p1</b>    | RADS1 associated protein 1                                                                 | 0001503 // ossification // inferred from electronic annotation//0001649 // osteoblast differentiation // inferred from direct assay//0033687 // osteoblast proliferation // inferred from direct assa         |
| 298.2584           | 255.43314         | NM_0103881//NM..003E |               | 0.008802823  | 1.17                | <b>H2-E-ps</b>      | histocompatibility 2, class II antigen E, pseudogene                                       | 0006351 // transcription, DNA-templated // inferred from electronic annotation//0006355 // regulation of transcription, DNA-templated // inferred from electronic annotation//0007275 // multic               |
| 124.185074         | 106.27043         | NM_173365//NM..006E  |               | 0.006449269  | 1.17                | <b>Gpr20</b>        | G protein-coupled receptor 20                                                              | 0006810 // transport // inferred from electronic annotation//0006843 // carbohydrate transport // inferred from electronic annotation//0010021 // amylopectin biosynthetic process // inferred f              |
| 270.6594           | 321.2604          | NM_001252568//NM..L  |               | 0.003521152  | 1.17                | <b>Phyd1</b>        | phytanoyl-CoA dioxygenase domain containing 1                                              | 0002002 // regulation of angiogenesis levels in blood // inferred from mutant phenotype//0006024 // glycosaminoglycan biosynthetic process // traceable author statement//0008152 // metabolic                |
| 740.3509           | 632.4095          | NM_0082977           |               | 0.008499008  | 1.17                | <b>Lncr1</b>        | leucine rich repeat containing 17                                                          | 0000278 // mitotic cell cycle // not recorded//0007049 // cell cycle // inferred from electronic annotation//0007059 // chromosome segregation // not recorded//0007067 // mitotic nuclear divi               |
| 345.43604          | 294.9927          | NM_1454942//NM..L    |               | 0.007478691  | 1.17                | <b>Zfp521</b>       | zinc finger protein 521                                                                    | 0006810 // transport // inferred from electronic annotation//0007584 // response to nutrient // inferred from electronic annotation//0007588 // excretion // inferred from mutant phenotype//D                |
| 157.20836          | 133.80429         | NM_008101//NM..006E  |               | 0.006889862  | 1.17                | <b>Gscr</b>         | glucagon receptor                                                                          | 0001846 // phagolysosome assembly // inferred from mutant phenotype//0006914 // autophagy // inferred from mutant phenotype//0034976 // response to endoplasmic reticulum stress // infer                     |
| 101.431564         | 93.892321         | NM_019058//NM..006E  |               | 0.009051858  | 1.17                | <b>Ints19</b>       | interleukin 17B                                                                            | 0006629 // lipid metabolic process // inferred from electronic annotation//0006631 // fatty acid metabolic process // inferred from electronic annotation//0006928 // movement of cell or subcell             |
| 234.96635          | 199.74162         | NM_0092004//NM..006E |               | 0.008736748  | 1.18                | <b>Slc2a4</b>       | solute carrier family 2 (facilitated glucose transporter), member 4                        | 0006810 // transport // inferred from electronic annotation//0006843 // carbohydrate transport // inferred from electronic annotation//0010021 // amylopectin biosynthetic process // inferred f              |
| 165.90924          | 141.00389         | NM_177391//NM..006E  |               | 0.006563343  | 1.18                | <b>Fam109b</b>      | family with sequence similarity 109, member B                                              | 0001881 // receptor recycling // not recorded//0007032 // endosome organization // not recorded//0042147 // retrograde transport, endosome to Golgi // not recorded                                           |
| 399.10037          | 339.0597          | NM_010811//NM..011L  |               | 0.006226222  | 1.18                | <b>Ndst2</b>        | N-deacetylase-N-sulfotransferase (heparan glucosaminyl) 2                                  | 0002002 // regulation of angiogenesis levels in blood // inferred from mutant phenotype//0006024 // glycosaminoglycan biosynthetic process // traceable author statement//0008152 // metabolic                |
| 269.62973          | 228.8949          | NM_023637//NM..006E  |               | 0.008349040  | 1.18                | <b>Sars2</b>        | seryl-aminocyclitol synthetase 2                                                           | 0006412 // translation // inferred from electronic annotation//0006418 // rRNA aminoacylation for protein translation // inferred from electronic annotation//0006434 // seryl-tRNA aminoacylati              |
| 140.7646           | 348.21103         | NM_172705//NM..011L  |               | 0.004020016  | 1.18                | <b>Pfif13</b>       | PHD finger protein 13                                                                      | 0000278 // mitotic cell cycle // not recorded//0007049 // cell cycle // inferred from electronic annotation//0007059 // chromosome segregation // not recorded//0007067 // mitotic nuclear divi               |
| 164.69235          | 139.59233         | NM_001286005//NM..L  |               | 0.003508852  | 1.18                | <b>Abcg8</b>        | ATP-binding cassette, sub-family G (WHITE), member 8                                       | 0006810 // transport // inferred from electronic annotation//0007584 // response to nutrient // inferred from electronic annotation//0007588 // excretion // inferred from mutant phenotype//D                |
| 280.2898           | 237.42984         | NM_0105911           |               | 0.006688685  | 1.18                | <b>Srxp</b>         | sushi-repeat-containing protein                                                            | 0001846 // phagolysosome assembly // inferred from mutant phenotype//0006914 // autophagy // inferred from mutant phenotype//0034976 // response to endoplasmic reticulum stress // infer                     |
| 297.25888          | 247.92035         | NM_007440//NM..011L  |               | 0.009530907  | 1.18                | <b>Alix2</b>        | arichonate 12-epoxide lyase                                                                | 0006629 // lipid metabolic process // inferred from electronic annotation//0006631 // fatty acid metabolic process // inferred from electronic annotation//0006928 // movement of cell or subcell             |
| 4018.3362          | 3389.8147         | NM_010494//NM..006E  |               | 0.00600007   | 1.19                | <b>Icam2</b>        | intercellular adhesion molecule 2                                                          | 0007155 // cell adhesion // not recorded//0016337 // single organismal cell-cell adhesion // inferred from electronic annotation                                                                              |
| 459.4576           | 387.014           | NM_028306//NM..006E  |               | 0.008276964  | 1.19                | <b>Hspa12b</b>      | heat shock protein 12B                                                                     | 000625 // chromatin organization // not recorded//0006342 // chromatin silencing // not recorded                                                                                                              |
| 2760.5708          | 2323.3743         | NM_029938            |               | 0.00770698   | 1.19                | <b>H2afv</b>        | H2A histone family, member V                                                               | 0006325 // chromatin organization // not recorded//0006342 // chromatin silencing // not recorded                                                                                                             |
| 60.661728          | 51.03382          | NM_011251757         |               | 0.009236917  | 1.19                | <b>LOC102641619</b> | uncharacterized LOC102641619                                                               | 0006508 // proteolysis // inferred from electronic annotation//0007229 // integrin-mediated signaling pathway // inferred from electronic annotation                                                          |
| 549.53625          | 462.12872         | NM_145974//NM..006E  |               | 0.007414868  | 1.19                | <b>N4bp3</b>        | NEDD4 binding protein 3                                                                    | 0006955 // immune response // inferred from electronic annotation//0010820 // positive regulation of T cell chemotaxis // inferred from direct assay//0060326 // cell chemotaxis // inferred from             |
| 163.50677          | 137.46642         | NR_131182//XR_86173  |               | 0.0099725694 | 1.19                | <b>Hoxaas2</b>      | Hoxa cluster antisense RNA 2                                                               | 0008152 // metabolic process // inferred from electronic annotation                                                                                                                                           |
| 423.30942          | 355.19946         | NM_024257            |               | 0.007082052  | 1.19                | <b>Hdhx3</b>        | haloalkal dehalogenase-like hydrolase domain containing 3                                  | 0006508 // proteolysis // inferred from electronic annotation//0007229 // integrin-mediated signaling pathway // inferred from electronic annotation                                                          |
| 149.3137           | 125.25706         | NM_175251//NM..006E  |               | 0.006019953  | 1.19                | <b>Srsf2</b>        | serine splicing factor 2                                                                   | 0006955 // immune response // inferred from electronic annotation//0010820 // positive regulation of T cell chemotaxis // inferred from direct assay//0060326 // cell chemotaxis // inferred from             |
| 90.75447           | 76.14254          | NM_130453            |               | 0.00757058   | 1.19                | <b>Guba2</b>        | glycoprotein hormone alpha 2                                                               |                                                                                                                                                                                                               |



| [CH/HeN_Air][raw] | [CH/HeN_O2][raw]    | [CH/HeN_PND5]        | RefSeq | Protein     | FC (Air/O2 at PND5) | Gene Symbol                | Gene Title                                                                                                                                                                                                                                                                                                                                                                                                                                                                                                                                                                                                                                | Gene Ontology Biological Process                                                                                                                                                                                              |
|-------------------|---------------------|----------------------|--------|-------------|---------------------|----------------------------|-------------------------------------------------------------------------------------------------------------------------------------------------------------------------------------------------------------------------------------------------------------------------------------------------------------------------------------------------------------------------------------------------------------------------------------------------------------------------------------------------------------------------------------------------------------------------------------------------------------------------------------------|-------------------------------------------------------------------------------------------------------------------------------------------------------------------------------------------------------------------------------|
| 189.0283          | 145.87575           | NM_0277361           |        | 0.00339819  | -1.30               | <b>LOC655506//Ttrbc21</b>  | T-cell receptor beta-2 chain C region-III/TT cell receptor beta, constant 2/TT cell receptor beta, joining region/TT cell receptor beta, constant region 1                                                                                                                                                                                                                                                                                                                                                                                                                                                                                |                                                                                                                                                                                                                               |
| 168.86008         | 130.30035           | NM_027402//XXM_0066  |        | 0.00258949  | -1.30               | <b>Fndc5</b>               | fibronectin type III domain containing 5                                                                                                                                                                                                                                                                                                                                                                                                                                                                                                                                                                                                  | 0014850 // response to muscle activity // inferred from direct assay//0090336 // positive regulation of brown fat cell differentiation // inferred from direct assay                                                          |
| 166.71684         | 128.41515           | NM_001311062//NM_1   |        | 0.001128667 | -1.30               | <b>Nmnt</b>                | nicotinamide N-methyltransferase                                                                                                                                                                                                                                                                                                                                                                                                                                                                                                                                                                                                          | 0010243 // response to organonitrogen compound // inferred from electronic annotation//0031100 // organ regeneration // inferred from electronic annotation//0003259 // methylation // inferred from electronic annotation    |
| 158.5534          | 152.48564           | NM_00104712//NM_1    |        | 0.009323349 | -1.30               | <b>Gm10406//Gm2897</b>     | predicted gene 10406//predicted gene 2897//predicted gene 2956//predicted gene 3                                                                                                                                                                                                                                                                                                                                                                                                                                                                                                                                                          | 0001193 // negative regulation of protein phosphorylation // inferred from direct assay//0007416 // synapse assembly // inferred from direct assay//0007416 // synapse assembly // inferred from direct assay                 |
| 133.30705         | 213.34778           | NM_001289546//NM_1   |        | 0.000566243 | -1.30               | <b>Amph</b>                | amphiphysin                                                                                                                                                                                                                                                                                                                                                                                                                                                                                                                                                                                                                               | 0007611 // learning // inferred from mutant phenotype//0048488 // synaptic vesicle endocytosis // inferred from mutant phenotype                                                                                              |
| 524.87134         | 402.7077            | NM_145474            |        | 0.00458889  | -1.30               | <b>Gdf10</b>               | growth differentiation factor 10                                                                                                                                                                                                                                                                                                                                                                                                                                                                                                                                                                                                          | 0001503 // ossification // inferred from electronic annotation//0001649 // osteoblast differentiation // inferred from electronic annotation//0010862 // positive regulation of pathway-restricted                            |
| 198.95648         | 152.63681           | NR_040286            |        | 0.003659848 | -1.30               | <b>Gm11627</b>             | predicted gene 11627                                                                                                                                                                                                                                                                                                                                                                                                                                                                                                                                                                                                                      |                                                                                                                                                                                                                               |
| 27.77665          | 21.30734            | NM_007608            |        | 0.007950821 | -1.30               | <b>Car5a</b>               | carbonic anhydrase 5a, mitochondrial                                                                                                                                                                                                                                                                                                                                                                                                                                                                                                                                                                                                      | 0006094 // gluconeogenesis // traceable author statement//0006730 // one-carbon metabolic process // inferred from electronic annotation                                                                                      |
| 33.694782         | 25.83183            | NM_001033638//NM_1   |        | 0.005751124 | -1.30               | <b>Cxas</b>                | cone-rod homeobox, opposite strand                                                                                                                                                                                                                                                                                                                                                                                                                                                                                                                                                                                                        |                                                                                                                                                                                                                               |
| 536.22095         | 411.02426           | NM_011133//XXM_0066  |        | 0.007355692 | -1.30               | <b>Pole2</b>               | polymerase (DNA directed), epsilon 2 (p59 subunit)                                                                                                                                                                                                                                                                                                                                                                                                                                                                                                                                                                                        | 0006260 // DNA replication // inferred from electronic annotation//0006261 // DNA-dependent DNA replication // not recorded//0042276 // error-prone translesion synthesis // not recorded                                     |
| 303.46637         | 232.39465           | NM_016662//XR_8734   |        | 0.005481401 | -1.31               | <b>Mxd3</b>                | Max dimerization protein 3                                                                                                                                                                                                                                                                                                                                                                                                                                                                                                                                                                                                                | 0006351 // transcription, DNA-templated // inferred from electronic annotation//0006355 // regulation of transcription, DNA-templated // inferred from electronic annotation//0045892 // negative regulation of transcription |
| 581.582           | 444.23303           | NM_001195006//NM_1   |        | 0.005887855 | -1.31               | <b>Ndr9a</b>               | N-myc downstream regulated gene 4                                                                                                                                                                                                                                                                                                                                                                                                                                                                                                                                                                                                         | 0007165 // signal transduction // not recorded//0007420 // brain development // not recorded//0008342 // visual learning // inferred from mutant phenotype//0010642 // negative regulation of transcription                   |
| 101.9239          | NM_030152//XXM_0066 |                      |        | 0.002449113 | -1.31               | <b>Nrb3</b>                | nucleolar protein 3 (apoptosis repressor with CARD domain)                                                                                                                                                                                                                                                                                                                                                                                                                                                                                                                                                                                | 0001666 // response to hypoxia // inferred from mutant phenotype//0001374 // blood vessel remodeling // inferred from mutant phenotype                                                                                        |
| 130.15642         | 49.43262            | NM_009937//NM_019    |        | 0.008873645 | -1.31               | <b>Col4//Hact1//LOC1.6</b> | collagen-like tail subunit (single strand of homotrimer) of asymmetric acetylcholinesterase                                                                                                                                                                                                                                                                                                                                                                                                                                                                                                                                               | 0001561 // fatty acid alpha-oxidation // not recorded//0006629 // lipid metabolic process // inferred from direct assay//0006631 // fatty acid metabolic process // inferred from electronic annotation                       |
| 102.21879         | 77.97485            | NM_001093162//NM_1   |        | 0.007885421 | -1.31               | <b>Ctjp2</b>               | CAP-Gly domain containing linker protein 2                                                                                                                                                                                                                                                                                                                                                                                                                                                                                                                                                                                                |                                                                                                                                                                                                                               |
| 61.568314         | 46.96007            | XR_384910//XR_38491  |        | 0.001723066 | -1.31               | <b>4930461C15Rik</b>       | Riken DNA 4930461C15 gene                                                                                                                                                                                                                                                                                                                                                                                                                                                                                                                                                                                                                 |                                                                                                                                                                                                                               |
| 142.44415         | 108.65357           | NM_009115            |        | 4.22E-04    | -1.31               | <b>SI00b</b>               | S100 protein, beta polypeptide, neural                                                                                                                                                                                                                                                                                                                                                                                                                                                                                                                                                                                                    | 0006112 // energy reserve metabolic process // non-traceable author statement//0006874 // cellular calcium ion homeostasis // non-traceable author statement//0007611 // learning or memory                                   |
| 221.69476         | 169.01898           | NM_0277361           |        | 0.004189276 | -1.31               | <b>LOC655506//Ttrbc21</b>  | T-cell receptor beta-2 chain C region-III/TT cell receptor beta, constant 2/TT cell receptor beta, joining region/TT cell receptor beta, constant region 1                                                                                                                                                                                                                                                                                                                                                                                                                                                                                |                                                                                                                                                                                                                               |
| 87.57351          | 66.657104           | NM_178713            |        | 0.00657037  | -1.31               | <b>Aldh8a1</b>             | aldehyde dehydrogenase 8 family, member A1                                                                                                                                                                                                                                                                                                                                                                                                                                                                                                                                                                                                | 0008152 // metabolic process // inferred from electronic annotation//0042573 // retinoic acid metabolic process // not recorded//0042574 // retinal metabolic process // inferred by curator//00                              |
| 230.88373         | 175.68396           | NM_022019//XXM_0066  |        | 0.006243027 | -1.31               | <b>Dusp10</b>              | dual specificity phosphatase 10                                                                                                                                                                                                                                                                                                                                                                                                                                                                                                                                                                                                           | 0000188 // inactivation of MAPK activity // not recorded//0002819 // regulation of adaptive immune response // inferred from mutant phenotype//0006470 // protein dephosphorylation // not r                                  |
| 64.342            | 48.90772            | NM_011093//XXM_0066  |        | 0.002212675 | -1.31               | <b>Dysp4</b>               | glyceraldehyde 3-phosphate dehydrogenase-like 4                                                                                                                                                                                                                                                                                                                                                                                                                                                                                                                                                                                           | 0003152 // metabolic process // inferred from electronic annotation//0048665 // neuron development // inferred from electronic annotation//0007997 // neuron death // inferred from electronic annotation                     |
| 299.22507         | 227.40921           | NM_009413//XXM_0066  |        | 0.009858822 | -1.32               | <b>Tp52l1</b>              | tumor protein 52-like 1                                                                                                                                                                                                                                                                                                                                                                                                                                                                                                                                                                                                                   | 0000086 // G2M transition of mitotic cell cycle // inferred from electronic annotation//0043046 // positive regulation of MAP kinase activity // not recorded//0040630 // positive regulation of JNK cascade // not r         |
| 49.027687         | 37.258095           | NM_008952//XXM_011   |        | 0.007625424 | -1.32               | <b>Pipax</b>               | pipelicolic acid oxidase                                                                                                                                                                                                                                                                                                                                                                                                                                                                                                                                                                                                                  | 00033514 // L-lysine catabolic process to acetyl-CoA via L-pipicolate // not recorded//00033514 // L-lysine catabolic process to acetyl-CoA via L-pipicolate // inferred from sequence or structural sim                      |
| 47.51229          | 37.11652            | NM_010255//XXM_0066  |        | 0.008407558 | -1.32               | <b>Gamt</b>                | guanidinacetate methyltransferase                                                                                                                                                                                                                                                                                                                                                                                                                                                                                                                                                                                                         | 0006601 // creatine biosynthetic process // inferred from mutant phenotype//0006601 // creatine biosynthetic process // not recorded//0007283 // spermatogenesis // inferred from mutant phe                                  |
| 44.394897         | 33.69496            | NM_008260            |        | 0.004690303 | -1.32               | <b>Foxa3</b>               | forkhead box A3                                                                                                                                                                                                                                                                                                                                                                                                                                                                                                                                                                                                                           | 0001678 // cellular glucose homeostasis // inferred from mutant phenotype//0006351 // transcription, DNA-templated // inferred from electronic annotation//0006355 // regulation of transcript                                |
| 187.39413         | 141.80872           | NM_001133246//NM_1   |        | 0.003131317 | -1.32               | <b>Chn1</b>                | chimerin 1                                                                                                                                                                                                                                                                                                                                                                                                                                                                                                                                                                                                                                | 0007165 // signal transduction // inferred from electronic annotation//0007399 // nervous system development // inferred from electronic annotation//0008045 // motor neuron axon guidance /                                  |
| 175.94558         | 119.45688           | NM_145073//XXM_178   |        | 0.002822057 | -1.32               | <b>Histh3d//Histh3e//</b>  | histone cluster 1, H3d//histone cluster 1, H3e//histone cluster 1, H3g//histone cluster 1, H3i//histone cluster 1, H3j//histone cluster 1, H3k//histone cluster 1, H3l//histone cluster 1, H3m//histone cluster 1, H3n//histone cluster 1, H3o//histone cluster 1, H3p//histone cluster 1, H3q//histone cluster 1, H3r//histone cluster 1, H3s//histone cluster 1, H3t//histone cluster 1, H3u//histone cluster 1, H3v//histone cluster 1, H3w//histone cluster 1, H3x//histone cluster 1, H3y//histone cluster 1, H3z//histone cluster 1                                                                                                 |                                                                                                                                                                                                                               |
| 79.55031          | 60.10018            | NM_013874//XXM_0066  |        | 8.19E-04    | -1.32               | <b>Dpfl</b>                | D4, zinc and double PHF fingers family 1                                                                                                                                                                                                                                                                                                                                                                                                                                                                                                                                                                                                  |                                                                                                                                                                                                                               |
| 97.258385         | 73.2427             | XR_105414//XR_10563  |        | 0.005115876 | -1.32               | <b>8B319198</b>            | expressed sequence BB319198                                                                                                                                                                                                                                                                                                                                                                                                                                                                                                                                                                                                               |                                                                                                                                                                                                                               |
| 2538.4473         | 1909.0544           | NM_001172481//NM_1   |        | 9.91E-04    | -1.32               | <b>Aspn</b>                | aspirin                                                                                                                                                                                                                                                                                                                                                                                                                                                                                                                                                                                                                                   | 0000182 // bone mineralization // not recorded//0030512 // negative regulation of transforming growth factor beta receptor signaling pathway // inferred from direct assay//0030512 // negative                               |
| 570.80664         | 430.55405           | NM_009043            |        | 0.006414854 | -1.32               | <b>Cox6a2</b>              | cytochrome c oxidase subunit Vb polypeptide 2                                                                                                                                                                                                                                                                                                                                                                                                                                                                                                                                                                                             | 1902600 // hydrogen ion transmembrane transport // inferred from electronic annotation                                                                                                                                        |
| 130.62384         | 97.848526           | NM_023893//NR_0282   |        | 0.008215139 | -1.33               | <b>Sapc1</b>               | suppressor APC domain containing 1                                                                                                                                                                                                                                                                                                                                                                                                                                                                                                                                                                                                        |                                                                                                                                                                                                                               |
| 663.5716          | 496.89578           | NM_001285792//NM_1   |        | 0.001184061 | -1.34               | <b>Wnt11</b>               | wingless-type MMTV integration site family, member 11                                                                                                                                                                                                                                                                                                                                                                                                                                                                                                                                                                                     | 0001649 // osteoblast differentiation // inferred from genetic interaction//0001822 // kidney development // inferred from direct assay//0001837 // epithelial to mesenchymal transition // infer                             |
| 380.6026          | 284.7722            | NM_0117766//XXM_0066 |        | 0.003777881 | -1.34               | <b>Zfp21</b>               | zinc finger protein, multigene site 21                                                                                                                                                                                                                                                                                                                                                                                                                                                                                                                                                                                                    | 0002122 // negative regulation of transcription from RNA polymerase II promoter // inferred from direct assay//0001570 // vasculogenesis // inferred from direct assay//0001570 // vasculogen                                 |
| 484.0141          | 361.22134           | NM_026507//XR_3794   |        | 0.009592122 | -1.34               | <b>Zw1ch</b>               | zwich kinetochore protein                                                                                                                                                                                                                                                                                                                                                                                                                                                                                                                                                                                                                 | 0007049 // cell cycle // inferred from electronic annotation//0007067 // mitotic nuclear division // inferred from electronic annotation//0007093 // mitotic cell cycle checkpoint // not recorded//                          |
| 59.72694          | 389.01385           | NM_172301//XXM_011   |        | 0.004115058 | -1.34               | <b>Ccnb1//Gm593</b>        | cyclin B1//predicted gene 593                                                                                                                                                                                                                                                                                                                                                                                                                                                                                                                                                                                                             | 0000278 // mitotic cell cycle // inferred from electronic annotation//0001556 // oocyte maturation // not recorded//0001701 // in utero embryonic development // inferred from mutant pheno                                   |
| 341.2712          | 254.0438            | NM_177157            |        | 0.009672785 | -1.34               | <b>Gchf1</b>               | GTP cyclidohydrolyase I feedback regulator                                                                                                                                                                                                                                                                                                                                                                                                                                                                                                                                                                                                | 0006461 // protein complex assembly // not recorded//0008132 // metabolic process // inferred from electronic annotation//0009890 // negative regulation of biosynthetic process // inferred fr                               |
| 68.97832          | 66.2403             | NM_178870            |        | 0.008170303 | -1.34               | <b>Hsd3a1</b>              | heparan sulfate (glucosaminyl) 3-O-sulfotransferase 3A1                                                                                                                                                                                                                                                                                                                                                                                                                                                                                                                                                                                   | 0001701 // in utero embryonic development // not recorded//0007049 // cell cycle // inferred from electronic annotation//0007067 // mitotic nuclear division // inferred from direct ass                                      |
| 1094.1049         | 813.5031            | NM_007630            |        | 0.009651392 | -1.34               | <b>Cn2</b>                 | cyclin B2                                                                                                                                                                                                                                                                                                                                                                                                                                                                                                                                                                                                                                 | 0005975 // carbohydrate metabolic process // inferred from electronic annotation//0008152 // metabolic process // inferred from electronic annotation                                                                         |
| 42.91121          | 31.889149           | NM_001133233//XXM_1  |        | 0.009625666 | -1.35               | <b>Glib13</b>              | galactosidase, beta 1 like 3                                                                                                                                                                                                                                                                                                                                                                                                                                                                                                                                                                                                              |                                                                                                                                                                                                                               |
| 56.909023         | 42.254776           | NM_172951//XXM_0066  |        | 0.001329307 | -1.35               | <b>Smtg2</b>               | synthrophin, gamma 2                                                                                                                                                                                                                                                                                                                                                                                                                                                                                                                                                                                                                      |                                                                                                                                                                                                                               |
| 54.56656          | 40.49965            | NM_007870//XXM_0066  |        | 0.001472945 | -1.35               | <b>Dnae113</b>             | deoxyribonuclease 1-like 3                                                                                                                                                                                                                                                                                                                                                                                                                                                                                                                                                                                                                |                                                                                                                                                                                                                               |
| 148.58667         | 110.58065           | NM_133657            |        | 0.003541715 | -1.35               | <b>Cyp2a12</b>             | cytochrome P450, family 2, subfamily a, polypeptide 12                                                                                                                                                                                                                                                                                                                                                                                                                                                                                                                                                                                    | 0006308 // DNA catabolic process // inferred from electronic annotation//0006309 // apoptotic DNA fragmentation // inferred from direct assay//0006915 // apoptotic process // inferred from el                               |
| 209.61296         | 155.32094           | NM_026272            |        | 0.004531102 | -1.35               | <b>Narf</b>                | neuronal prelamin A recognition factor                                                                                                                                                                                                                                                                                                                                                                                                                                                                                                                                                                                                    | 0006226 // iron-sulfur cluster assembly // ...                                                                                                                                                                                |
| 41.305496         | 30.594374           | NM_001305451//NM_1   |        | 0.007885694 | -1.35               | <b>Pippr5</b>              | phosphatidyl phosphatase related 5                                                                                                                                                                                                                                                                                                                                                                                                                                                                                                                                                                                                        | 0006644 // phospholipid metabolic processes // not recorded//0007165 // signal transduction // not recorded//0008152 // metabolic process // inferred from electronic annotation//0046839 // pl                               |
| 1479.3536         | 1095.6038           | NM_028490            |        | 0.004982236 | -1.35               | <b>Prox2</b>               | proximo 2 // positive regulation of peptidase activity // not recorded                                                                                                                                                                                                                                                                                                                                                                                                                                                                                                                                                                    | 0001952 // positive regulation of peptidase activity // not recorded                                                                                                                                                          |
| 83.97234          | 62.180065           | NM_019538//XXM_0066  |        | 5.95E-04    | -1.35               | <b>Plac1</b>               | placental specific protein 1                                                                                                                                                                                                                                                                                                                                                                                                                                                                                                                                                                                                              | 0001890 // placenta development // inferred from expression pattern//0001890 // placenta development // inferred from electronic annotation//0007275 // multicellular organismal developmen                                   |
| 476.18713         | 351.8902            | NM_023785            |        | 0.003983111 | -1.35               | <b>Ppbp</b>                | pro-platelet basic protein                                                                                                                                                                                                                                                                                                                                                                                                                                                                                                                                                                                                                | 0002523 // leukocyte migration involved in inflammatory response // inferred from mutant phenotype//0002690 // positive regulation of leukocyte chemotaxis // not recorded//0006954 // infan                                  |
| 114.962105        | 84.890724           | NM_001012306//NM_1   |        | 0.004329782 | -1.35               | <b>Hsd3b2//Hsd3b2/H</b>    | hydroxy-delta-5-steroid dehydrogenase, 3 beta- and steroid delta-isomerase 3//hydrox                                                                                                                                                                                                                                                                                                                                                                                                                                                                                                                                                      | 0006694 // steroid biosynthetic process // inferred from electronic annotation//0008152 // metabolic process // inferred from electronic annotation//0051114 // oxidation-reduction process // in                             |
| 354.41446         | 261.4442            | NM_001190733//NM_1   |        | 0.002693217 | -1.36               | <b>Dcun1d4</b>             | DCN1, defective in cullin neddylation 1, domain containing 4 (S. cerevisiae)                                                                                                                                                                                                                                                                                                                                                                                                                                                                                                                                                              | 0004511 // protein neddylation // not recorded//0051443 // positive regulation of ubiquitin-protein transferase activity // not recorded                                                                                      |
| 186.93636         | 137.77863           | NM_054077//XXM_0066  |        | 4.42E-04    | -1.36               | <b>Prpl</b>                | proline arginine-rich end leucine-rich repeat                                                                                                                                                                                                                                                                                                                                                                                                                                                                                                                                                                                             | 0007409 // xenogenesis // --//0007569 // cell aging // inferred from direct assay//0018146 // keratan sulfate biosynthetic process // not recorded//0042340 // keratan sulfate catabolic proces                               |
| 267.04495         | 196.74127           | NM_013548//XXM_013   |        | 0.001963066 | -1.36               | <b>Histh3a//Histh3b//</b>  | histone cluster 1, H3a//histone cluster 1, H3b//histone cluster 1, H3c//histone cluster 1, H3d//histone cluster 1, H3e//histone cluster 1, H3f//histone cluster 1, H3g//histone cluster 1, H3i//histone cluster 1, H3j//histone cluster 1, H3k//histone cluster 1, H3l//histone cluster 1, H3m//histone cluster 1, H3n//histone cluster 1, H3o//histone cluster 1, H3p//histone cluster 1, H3q//histone cluster 1, H3r//histone cluster 1, H3s//histone cluster 1, H3t//histone cluster 1, H3u//histone cluster 1, H3v//histone cluster 1, H3w//histone cluster 1, H3x//histone cluster 1, H3y//histone cluster 1, H3z//histone cluster 1 |                                                                                                                                                                                                                               |
| 99.37821          | 73.2093             | NM_0117766//NM_1     |        | 0.001856598 | -1.36               | <b>Adam23</b>              | a disintegrin and metalloproteinase domain 23                                                                                                                                                                                                                                                                                                                                                                                                                                                                                                                                                                                             |                                                                                                                                                                                                                               |
| 425.58768         | 313.09772           | NM_011496//XXM_0066  |        | 0.003938098 | -1.36               | <b>Aurkb</b>               | aurora kinase B                                                                                                                                                                                                                                                                                                                                                                                                                                                                                                                                                                                                                           | 0000122 // negative regulation of transcription from RNA polymerase II promoter // not recorded//0002903 // negative regulation of B cell apoptotic process // not recorded//0006468 // protein                               |
| 309.18173         | 227.28385           | NM_053091            |        | 0.001594854 | -1.36               | <b>Cox12</b>               | cytochrome c oxidase subunit IV isoform 2                                                                                                                                                                                                                                                                                                                                                                                                                                                                                                                                                                                                 | 0005123 // mitochondrial electron transport, cytochrome c to oxygen // --//0009060 // aerobic respiration // --//1902600 // hydrogen ion transmembrane transport // not recorded                                              |
| 546.4507          | 401.47784           | NM_001253808//NM_1   |        | 0.006395718 | -1.36               | <b>Rocgpl1</b>             | Rac GTPase-activating protein 1                                                                                                                                                                                                                                                                                                                                                                                                                                                                                                                                                                                                           | 0000281 // mitotic cytokinesis // not recorded//0009151 // actomyosin contractile ring assembly // not recorded//0006810 // transport // inferred from electronic annotation//0006811 // ion tr                               |
| 189.68596         | 139.26758           | NM_0277361           |        | 0.004157001 | -1.36               | <b>LOC655506//Ttrbc-1</b>  | T-cell receptor beta-2 chain C region-I/TT cell receptor beta, joining region/TT cell receptor beta, constant region 1/TT cell receptor beta, constant region 2                                                                                                                                                                                                                                                                                                                                                                                                                                                                           |                                                                                                                                                                                                                               |
| 101.73936         | 74.69284            | NM_023729//XXM_0066  |        | 0.009742639 | -1.36               | <b>Asz1</b>                | ankyrin repeat, SAM and basic leucine zipper domain containing 1                                                                                                                                                                                                                                                                                                                                                                                                                                                                                                                                                                          | 0007140 // male meiosis // inferred from mutant phenotype//0007165 // signal transduction // non-traceable author statement//0007275 // multicellular organismal development // inferred fr                                   |
| 2704.9768         | 1983.0739           | NM_021896//XXM_0066  |        | 0.007983006 | -1.36               | <b>Gucy1a3</b>             | guanylate cyclase 1, soluble, alpha 3                                                                                                                                                                                                                                                                                                                                                                                                                                                                                                                                                                                                     | 0006182 // cGMP biosynthetic process // inferred from mutant phenotype//0006182 // cGMP biosynthetic process // not recorded//0007165 // signal transduction // not recorded//0007263 // ion t                                |
| 85.47847          | 62.541897           | NM_024237//XXM_0066  |        | 0.002771269 | -1.37               | <b>Fbln7</b>               | fibulin 7                                                                                                                                                                                                                                                                                                                                                                                                                                                                                                                                                                                                                                 | 0007155 // cell adhesion // inferred from electronic annotation                                                                                                                                                               |
| 29.10569          | 21.294611           | NM_172881            |        | 0.008575853 | -1.37               | <b>Ugt2b35</b>             | UDP glucuronosyltransferase 2 family, polypeptide B35                                                                                                                                                                                                                                                                                                                                                                                                                                                                                                                                                                                     | 0008152 // metabolic process // inferred from electronic annotation//0009813 // flavonoid biosynthetic process // not recorded//0032870 // cellular response to hormone stimulus // not recorde                               |
| 284.58817         | 206.11089           | NM_010261            |        | 0.00702277  | -1.37               | <b>Klf11</b>               | krinein family, member 11                                                                                                                                                                                                                                                                                                                                                                                                                                                                                                                                                                                                                 | 0007018 // microtubule-based movement // not recorded//0007049 // cell cycle // inferred from electronic annotation//0007051 // spindle organization // not recorded//0007059 // chromos                                      |
| 290.40033         | 212.24098           | NM_023294            |        | 0.002954948 | -1.37               | <b>Ndc80</b>               | NDC80 homolog, kinetochore complex component (S. cerevisiae)                                                                                                                                                                                                                                                                                                                                                                                                                                                                                                                                                                              | 0000070 // mitotic sister chromatid segregation // not recorded//0000332 // establishment of mitotic spindle orientation // not recorded//0007049 // cell cycle // inferred from electronic annota                            |
| 410.01532         | 298.67725           | NM_001291185//NM_1   |        | 0.004057874 | -1.37               | <b>Aurka</b>               | aurora kinase A                                                                                                                                                                                                                                                                                                                                                                                                                                                                                                                                                                                                                           | 0000212 // meiotic spindle organization // inferred from mutant phenotype//000226 // microtubule cytoskeleton organization // inferred from genetic interaction//0000278 // mitotic cell cycle,                               |
| 61.556835         | 44.793827           | NM_013485            |        | 0.004343597 | -1.37               | <b>C9</b>                  | complement component 9                                                                                                                                                                                                                                                                                                                                                                                                                                                                                                                                                                                                                    | 0002376 // immune system process // inferred from electronic annotation//0006955 // immune response // inferred from electronic annotation//0006957 // complement activation, alternative p                                   |
| 78.32104          | 56.97495            | NM_001163098         |        | 0.001417046 | -1.37               | <b>Tchh</b>                | trichohyalin                                                                                                                                                                                                                                                                                                                                                                                                                                                                                                                                                                                                                              | 0045109 // intermediate filament organization // inferred from direct assay                                                                                                                                                   |
| 62.649708         | 45.51216            | NM_001033767//NM_1   |        | 0.003623473 | -1.38               | <b>Gm4951</b>              | predicted gene 4951                                                                                                                                                                                                                                                                                                                                                                                                                                                                                                                                                                                                                       | 0034548 // cellular response to interferon-beta // inferred from direct assay                                                                                                                                                 |
| 614.2503          | 445.8619            | NM_028804            |        | 5.30E-04    | -1.38               | <b>Cdc3</b>                | coiled-coil domain containing 3                                                                                                                                                                                                                                                                                                                                                                                                                                                                                                                                                                                                           |                                                                                                                                                                                                                               |
| 47.90137          | 34.766285           | NM_00109136          |        | 0.002315223 | -1.38               | <b>Scrg1</b>               | sprinkle responsive gene 1                                                                                                                                                                                                                                                                                                                                                                                                                                                                                                                                                                                                                |                                                                                                                                                                                                                               |
| 2094.4548         | 1516.0364           | NM_001199246//NM_1   |        | 0.007841181 | -1.38               | <b>Magep2</b>              | melanoma antigen, family D, 2                                                                                                                                                                                                                                                                                                                                                                                                                                                                                                                                                                                                             |                                                                                                                                                                                                                               |
| 1380.9436         | 99.2164             | NM_175366            |        | 0.004249969 | -1.39               | <b>Nxsb3</b>               | Nxsb3 homolog B (C. elegans)                                                                                                                                                                                                                                                                                                                                                                                                                                                                                                                                                                                                              |                                                                                                                                                                                                                               |
| 109.64966         | 79.04609            | NM_138673            |        | 0.008710697 | -1.39               | <b>Stab2</b>               | stabilin 2                                                                                                                                                                                                                                                                                                                                                                                                                                                                                                                                                                                                                                |                                                                                                                                                                                                                               |
| 296.8485          | 213.867             | NM_172604            |        | 0.007994882 | -1.39               | <b>Scara3</b>              | scurf receptor class A, member 3                                                                                                                                                                                                                                                                                                                                                                                                                                                                                                                                                                                                          |                                                                                                                                                                                                                               |
| 169.95557         | 122.2284            | NM_008156//XXM_011   |        | 0.009890824 | -1.39               | <b>Gpdt1</b>               | glycosylphosphatidylinositol specific phospholipase D1                                                                                                                                                                                                                                                                                                                                                                                                                                                                                                                                                                                    |                                                                                                                                                                                                                               |
| 410.84442         | 295.23694           | NM_010225            |        | 0.006406569 | -1.39               | <b>Foxf2</b>               | forkhead box F2                                                                                                                                                                                                                                                                                                                                                                                                                                                                                                                                                                                                                           |                                                                                                                                                                                                                               |
| 71.83726          | 51.516804           | NM_001035509//NM_1   |        | 9.12E-04    | -1.39               | <b>Zcchr18</b>             | zinc finger, CCHC domain containing                                                                                                                                                                                                                                                                                                                                                                                                                                                                                                                                                                                                       |                                                                                                                                                                                                                               |

| [CH/HeN, Air][raw] | [CH/HeN, O2][raw] | RefSeq                | Transcript ID | p            | FC (Air/O2 at PND5) | Gene Symbol          | Gene Title                                                                                      | Gene Ontology Biological Process                                                                                                                                                                                      |
|--------------------|-------------------|-----------------------|---------------|--------------|---------------------|----------------------|-------------------------------------------------------------------------------------------------|-----------------------------------------------------------------------------------------------------------------------------------------------------------------------------------------------------------------------|
| 168.01364          | 115.862076        | NM_025495//XM_0061    |               | 0.001110381  | -1.45               | <b>Cenpf</b>         | centromere protein P                                                                            | 00034080 // CENP-A containing nucleosome assembly // inferred from electronic annotation                                                                                                                              |
| 705.95074          | 486.16928         | NM_019696             |               | 0.009535124  | -1.45               | <b>Cpxm1</b>         | carboxypeptidase X1 (M14 family)                                                                | 00000380 // proteolysis // inferred from direct assay//0006518 // peptide metabolic process // --//0008152 // metabolic process // inferred from electronic annotation//0016485 // protein proc                       |
| 39.764717          | 27.36691          | NM_009512             |               | 0.002683119  | -1.45               | <b>Slc27a5</b>       | solute carrier family 27 (fatty acid transporter), member 5                                     | 00000038 // very long-chain fatty acid biosynthetic process // not recorded//0001676 // long-chain fatty acid metabolic process // traceable author statement//0006629 // lipid metabolic process //                  |
| 325.86383          | 224.54716         | NM_001316729//NM_1    |               | 0.001639707  | -1.45               | <b>Gpct</b>          | glutamine-peptide cyclotransferase (glutaminyl cyclase)                                         | 00017186 // peptide/lipid metabolic process // inferred from electronic annotation//0005978 // glycogen biosynthetic process // --//0006006 // glucose metabolic process // inferred from electro                     |
| 452.6234           | 310.10918         | NM_175053             |               | 1.00E-03     | -1.45               | <b>Pgm5</b>          | phosphoglucomutase 5                                                                            | 0005978 // carbohydrate metabolic process // inferred from electronic annotation//0005978 // glycogen biosynthetic process // --//0006006 // glucose metabolic process // inferred from electro                       |
| 110.27305          | 75.11504          | NM_00131905//NM_1     |               | 0.001569709  | -1.47               | <b>Kcnn2</b>         | potassium intermediate/small conductance calcium-activated channel, subfamily N, member 2       | 00068810 // transport // inferred from electronic annotation//0006811 // ion transport // inferred from direct assay//0006813 // potassium ion transport // not recorded//0048168 // regulation                       |
| 151.9871           | 103.295204        | NM_146052//XM_0061    |               | 0.004232128  | -1.47               | <b>Lrrc3b</b>        | leucine rich repeat containing 3B                                                               |                                                                                                                                                                                                                       |
| 1404.9125          | 952.4901          | NM_00116471//NM_1     |               | 0.008740387  | -1.47               | <b>Myl6b//Myl7b</b>  | myosin, heavy polypeptide 6, cardiac muscle, alpha//myosin, heavy polypeptide 7, card           | 0001701 // in utero embryonic development // inferred from mutant phenotype//0002026 // regulation of the force of heart contraction // inferred from mutant phenotype//0002026 // regulatio                          |
| 107.102325         | 102.68211         | NM_029797//XM_0061    |               | 0.0012578    | -1.49               | <b>Mnd1</b>          | meiotic nuclear division 1 homolog (S. cerevisiae)                                              | 00063210 // DNA recombination // inferred from electronic annotation//0051321 // meiotic cell cycle // inferred from electronic annotation                                                                            |
| 64.475334          | 43.38813          | NM_001081389//NM_1    |               | 0.00379618   | -1.49               | <b>Nlrp6</b>         | NLR family, pyrin domain containing 6                                                           | 0002373 // immune system process // inferred from electronic annotation//0002862 // negative regulation of inflammatory response to antigenic stimulus // inferred from mutant phenotype//00                          |
| 381.5137           | 256.4819          | NM_178890             |               | 0.002984563  | -1.49               | <b>Adbt2</b>         | ankyrin repeat and BTR (POZ) domain containing 2                                                |                                                                                                                                                                                                                       |
| 105.643845         | 70.79993          | NM_001135515//NM_1    |               | 0.007456162  | -1.49               | <b>Col2a1</b>        | collagen, type II, alpha 1                                                                      | 0001501 // skeletal system development // not recorded//0001502 // cartilage condensation // inferred from mutant phenotype//0001503 // ossification // inferred from expression pattern//00                          |
| 178.5513           | 119.7702          | NM_001040689//NM_1    |               | 0.00638814   | -1.49               | <b>Rpsd4</b>         | R-spondin 4                                                                                     | 0005055 // Wnt signaling pathway // inferred from electronic annotation//0005086 // response to stimulus // inferred from electronic annotation//0009263 // positive regulation of canonical Wnt                      |
| 303.3703           | 202.81453         | NM_0138811//XM_0061   |               | 0.003096877  | -1.50               | <b>Dnah8</b>         | dynein, axonemal, heavy chain 8                                                                 | 00012108 // microtubule-based movement // inferred from electronic annotation//0008152 // metabolic process // inferred from electronic annotation//00012108 // microtubule-based movement // infer                   |
| 70.20316           | 46.791542         | NM_019546//XM_0061    |               | 0.001739666  | -1.50               | <b>Prad2</b>         | proline dehydrogenase (oxidase) 2                                                               | 0006560 // proline metabolic process // inferred from electronic annotation//0006562 // proline catabolic process // inferred from electronic annotation//0001033 // proline catabolic process to                     |
| 120.38198          | 80.08182          | NM_001308327//XM_0061 |               | 0.008247933  | -1.50               | <b>Enpp1</b>         | ectonucleotide diphosphohosphatase/phosphodiesterase 1                                          | 0006091 // generation of precursor metabolites and energy // not recorded//0006796 // phosphate-containing compound metabolic process // not recorded//0001578 // receptor-mediated endo                              |
| 277.09024          | 182.36577         | NM_001166406//NM_1    |               | 0.004344233  | -1.52               | <b>Klf20a</b>        | kinase family member 20A                                                                        | 0002081 // mitotic cytokinesis // not recorded//0000910 // cytokinesis // not recorded//0000920 // cell separation after cytokinesis // not recorded//0001578 // microtubule bundle formation /                       |
| 185.80823          | 121.88685         | NM_011797//XM_0061    |               | 0.00236166   | -1.52               | <b>Car14</b>         | carbinic anhydrase 14                                                                           | 0006885 // regulation of pH // inferred by curator//0008152 // metabolic process // inferred from electronic annotation//0015670 // carbon dioxide transport // inferred by curator                                   |
| 43.59563           | 28.55314          | NM_001081567//NM_1    |               | 0.007358679  | -1.53               | <b>Mapk10</b>        | mitogen-activated protein kinase 10                                                             | 0002022 // negative regulation of transcription from RNA polymerase II promoter // not recorded//0000165 // MAPK cascade // inferred from electronic annotation//0006468 // protein phospho                           |
| 169.51477          | 110.84661         | NM_144869//XM_0061    |               | 0.0025293102 | -1.53               | <b>BC021614</b>      | cDNA sequence BC021614                                                                          | 0008152 // metabolic process // inferred from electronic annotation                                                                                                                                                   |
| 171.4738           | 111.85506         | NM_001242368//NM_1    |               | 0.004170349  | -1.53               | <b>F10</b>           | coagulation factor X                                                                            | 0007596 // proteolysis // inferred from electronic annotation//0007596 // blood coagulation // inferred from electronic annotation//0007599 // hemostasis // inferred from electronic annotation//0030335 // positive |
| 86.32338           | 56.16087          | NM_008243//XM_0061    |               | 0.001163503  | -1.54               | <b>Ast11</b>         | macrophage stimulating 1 (hepatocyte growth factor-like)                                        | 0006508 // proteolysis // inferred from electronic annotation//0007283 // spermatogenesis // inferred from electronic annotation//0007566 // embryo implantation // inferred from direct assay//                      |
| 233.27997          | 144.00882         | NM_173301//XM_0111    |               | 0.004021784  | -1.55               | <b>Ccnb1//Gms593</b> | cyclin B1/primed gene 5593                                                                      | 0000278 // mitotic cell cycle // inferred from electronic annotation//0001566 // oocyte maturation // not recorded//0001701 // in utero embryonic development // inferred from mutant phenoty                         |
| 344.83237          | 212.29279         | NM_019662//XM_0061    |               | 9.33E-04     | -1.56               | <b>Rrad</b>          | Ras-related associated with diabetes                                                            | 0007165 // signal transduction // inferred from electronic annotation//0007264 // small GTPase mediated signal transduction // inferred from electronic annotation//0003038 // negative regulat                       |
| 23.84237           | 15.212607         | NM_001195596          |               | 0.004552898  | -1.57               | <b>Smrl1</b>         | small leucine-rich protein 1                                                                    |                                                                                                                                                                                                                       |
| 64.28954           | 40.688522         | NM_145539             |               | 8.39E-04     | -1.58               | <b>Tms4f4</b>        | transmembrane 4 superfamily member 4                                                            | 0042246 // tissue regeneration // inferred from electronic annotation                                                                                                                                                 |
| 80.29109           | 50.800438         | NM_001276710//NM_1    |               | 0.005120005  | -1.58               | <b>Apxt</b>          | alanine-glyoxylate aminotransferase                                                             | 0007219 // Notch signaling pathway // inferred from direct assay//0008152 // metabolic process // inferred from electronic annotation//0009436 // glyoxylate catabolic process // not recorded//                      |
| 169.34901          | 107.0099          | NM_007385             |               | 0.008119087  | -1.58               | <b>Apoc4</b>         | apolipoprotein C-IV                                                                             | 0006810 // transport // inferred from electronic annotation//0006869 // lipid transport // inferred from electronic annotation//0001890 // positive regulation of sequestering of triglyceride // no                  |
| 121.73744          | 76.915276         | NM_001301404//NM_1    |               | 0.008470004  | -1.58               | <b>Serpina10</b>     | serpin (or cysteine) peptidase inhibitor, clade A (alpha-1-antitrypsin, antitrypsin), member 10 | 0007596 // blood coagulation // inferred from electronic annotation//0007599 // hemostasis // inferred from electronic annotation//0010466 // negative regulation of peptidase activity // infer                      |
| 49.80333           | 31.42588          | NM_008203//XM_0061    |               | 0.005906464  | -1.58               | <b>Lpc</b>           | lecithase, hepatic                                                                              | 0006629 // lipid metabolic process // inferred from electronic annotation//0006631 // fatty acid metabolic process // not recorded//0000633 // fatty acid biosynthetic process // not recorded//0                     |
| 47.997456          | 30.27916          | NM_001081361//NM_1    |               | 0.009827971  | -1.59               | <b>1-Mar</b>         | mitochondrial amidoxime reducing component 1                                                    | 0042126 // nitrate metabolic process // not recorded//0055114 // oxidation-reduction process // not recorded                                                                                                          |
| 248.65813          | 156.40622         | NM_001274102//NM_1    |               | 3.46E-05     | -1.59               | <b>Ephx2</b>         | epoxide hydrolase 2, cytoplasmic                                                                | 0002529 // prostaglandin production involved in inflammatory response // not recorded//0006470 // protein dephosphorylation // inferred from electronic annotation//0006629 // lipid metaboli                         |
| 259.05347          | 161.85078         | NM_028222//XM_0061    |               | 0.00168719   | -1.60               | <b>Cdkn3</b>         | cyclin-dependent kinase inhibitor 3                                                             | 0000082 // G1/S transition of mitotic cell cycle // not recorded//0006470 // protein dephosphorylation // not recorded//0006974 // cellular response to DNA damage stimulus // not recorded//0                        |
| 162.89772          | 101.10014         | NM_0026183//XM_0061   |               | 8.68E-04     | -1.61               | <b>Slc47a1</b>       | solute carrier family 47, member 1                                                              | 0006810 // transport // inferred from electronic annotation//0006855 // drug transmembrane transport // not recorded//0015695 // organic cation transport // not recorded//0015893 // drug t                          |
| 195.3091           | 121.179985        | NM_001170978//NM_1    |               | 5.77E-04     | -1.61               | <b>Abat</b>          | 4-aminobutyrate aminotransferase                                                                | 0001666 // response to hypoxia // not recorded//0007568 // aging // not recorded//0007620 // copulation // not recorded//0007626 // locomotor behavior // not recorded//0009448 // gamm                               |
| 91.19781           | 55.703423         | NM_001033415          |               | 5.08E-04     | -1.64               | <b>Shisa3</b>        | shisa family member 3                                                                           | 0007275 // multicellular organismal development // inferred from electronic annotation                                                                                                                                |
| 123.40443          | 73.35719          | NM_001093914//NM_1    |               | 0.007634767  | -1.68               | <b>Obscn</b>         | obscurin, cytoskeletal cadherin and titin-interacting RhoGEP                                    | 0006488 // protein phosphorylation // inferred from electronic annotation//0007275 // multicellular organismal development // inferred from electronic annotation//0016310 // phosphorylation                         |
| 184.82088          | 109.55841         | NM_011978             |               | 0.007606559  | -1.69               | <b>Slc27a2</b>       | solute carrier family 27 (fatty acid transporter), member 2                                     | 00000380 // very long-chain fatty acid metabolic process // inferred from direct assay//0001561 // long-chain fatty acid metabolic process // not recorded//001676 // long-chain fatty acid metabolic process //      |
| 2611.0825          | 1545.8308         | NM_008120             |               | 0.001236268  | -1.69               | <b>Gja1</b>          | gap junction protein, alpha 4                                                                   | 00011568 // blood vessel development // inferred from mutant phenotype//0003158 // endothelial development // inferred from electronic annotation//0006816 // calcium ion transport // not r                          |
| 1094.1165          | 645.82526         | NM_018870             |               | 0.004460862  | -1.69               | <b>Pgam2</b>         | phosphoglycerate mutase 2                                                                       | 0006094 // gluconeogenesis // not recorded//0006096 // glycolytic process // inferred from direct assay//0006096 // glycolytic process // not recorded//0006470 // protein dephosphorylation /                        |
| 67.583115          | 38.96788          | NM_145416             |               | 0.00150004   | -1.73               | <b>Afm</b>           | afamin                                                                                          | 0006810 // transport // inferred from electronic annotation//0051180 // vitamin transport // not recorded                                                                                                             |
| 94.460754          | 54.41995          | NM_001271777//NM_1    |               | 0.002884099  | -1.74               | <b>Cbg</b>           | complement component 8, gamma polypeptide                                                       | 0002376 // immune system process // inferred from electronic annotation//0006957 // complement activation, alternative pathway // inferred from electronic annotation//0006958 // compleme                            |
| 106.256775         | 60.01181          | NM_011658             |               | 3.16E-04     | -1.77               | <b>Twist1</b>        | twist basic helix-loop-helix transcription factor 1                                             | 0000212 // negative regulation of transcription from RNA polymerase II promoter // not recorded//0001022 // negative regulation of transcription from RNA polymerase II promoter // infer                             |
| 135.0162           | 76.13907          | NM_001126338//NM_1    |               | 0.004004287  | -1.77               | <b>Prrn1//Prrnd</b>  | prion protein gene complex//prion protein dublet                                                | 000040287 // cellular copper ion homeostasis // inferred from direct assay//0001260 // protein homooligomerization // inferred from electronic annotation                                                             |
| 76.38546           | 43.725334         | NM_027150//XM_0061    |               | 0.00345755   | -1.78               | <b>Milp</b>          | milprotein LUNA-interacting protein                                                             | 0000212 // negative regulation of transcription from RNA polymerase II promoter // inferred from genetic interaction//0010614 // negative regulation of cardiac muscle hypertrophy // infer                           |
| 123.09301          | 84.45728          | NM_018209             |               | 0.002654023  | -1.80               | <b>Alb11a1</b>       | aldehyde dehydrogenase (NAD-dependent) family, member B1                                        | 0006560 // ethanol catabolic process // inferred from electronic annotation//0008152 // metabolic process // inferred from electronic annotation//0005514 // oxidation-reduction process // infer                     |
| 154.93188          | 84.98562          | NM_054063             |               | 0.001426787  | -1.82               | <b>Psg28</b>         | pregnancy-specific glycoprotein 28                                                              | 0007565 // female pregnancy // inferred from electronic annotation                                                                                                                                                    |
| 75.629225          | 40.378742         | NM_019447//XM_0061    |               | 0.00456328   | -1.87               | <b>Hgfcr</b>         | hepatocyte growth factor activator                                                              | 0006508 // proteolysis // inferred from electronic annotation                                                                                                                                                         |
| 700.61145          | 367.42453         | NM_010174             |               | 9.61E-04     | -1.91               | <b>Fabp3</b>         | fatty acid binding protein 3, muscle and heart                                                  | 0006810 // transport // inferred from electronic annotation//0007507 // heart development // inferred from electronic annotation//0015909 // long-chain fatty acid transport // not recorded//0                       |
| 129.3738           | 66.3822           | NM_009406             |               | 0.002053409  | -1.94               | <b>Tnni3</b>         | troponin I, cardiac 3                                                                           | 0001570 // vasculogenesis // inferred from direct assay//0001980 // regulation of systemic arterial blood pressure by ischemic conditions // inferred from mutant phenotype//0003009 // skeletal                      |
| 120.92352          | 62.355164         | NM_008223//XM_0061    |               | 0.001383099  | -1.94               | <b>Serpind1</b>      | serpin (or cysteine) peptidase inhibitor, clade D, member 1                                     | 0007596 // blood coagulation // inferred from electronic annotation//0007599 // hemostasis // inferred from electronic annotation//0010466 // negative regulation of peptidase activity // infer                      |
| 414.36502          | 211.73636         | NM_001159299//NM_1    |               | 0.00649854   | -1.96               | <b>Irb4</b>          | intra alpha-trypsin inhibitor, heavy chain 4                                                    | 0006953 // acute-phase response // inferred from electronic annotation//0010466 // negative regulation of peptidase activity // inferred from electronic annotation//0010951 // negative regulat                      |
| 317.9818           | 161.72597         | NM_0103211//XM_0061   |               | 0.009760490  | -1.97               | <b>Gnmt</b>          | glycine N-methyltransferase                                                                     | 0005977 // glycogen metabolic process // inferred from mutant phenotype//0006111 // regulation of gluconeogenesis // inferred from mutant phenotype//0006555 // methionine metabolic proc                             |
| 280.64297          | 141.34807         | NM_144944//XM_0111    |               | 0.0066621049 | -1.99               | <b>Prokr2</b>        | prokineticin receptor 2                                                                         | 0007165 // signal transduction // inferred from electronic annotation//0007166 // cell surface receptor signaling pathway // not recorded//0007186 // G-protein coupled receptor signaling pathwa                     |
| 132.63043          | 64.94063          | NM_153529//XM_0061    |               | 0.00952198   | -2.04               | <b>Nrx1</b>          | neuritin 1                                                                                      | 0007399 // nervous system development // not recorded//0007400 // angiogenesis // not recorded//0199038 // neuron projection extension // inferred from direct assay                                                  |
| 1089.3699          | 522.68            | NM_00119884//NM_1     |               | 0.002625942  | -2.08               | <b>Cxcr3</b>         | cysteine and glycine-rich protein 3                                                             | 0001974 // blood vessel remodeling // inferred from electronic annotation//0002026 // regulation of the force of heart contraction // inferred from genetic interaction//0003300 // cardiac muscle                    |
| 718.5191           | 85.29722          | NM_011575             |               | 0.003150318  | -2.09               | <b>Tff3</b>          | trefoil factor 3, intestinal                                                                    | 0010906 // regulation of glucose metabolic process // inferred from direct assay                                                                                                                                      |
| 489.41696          | 231.00311         | NM_175499//XM_0061    |               | 6.75E-04     | -2.12               | <b>Slt1a6</b>        | SLT and NTRK-like family, member 6                                                              | 0001964 // startle response // inferred from mutant phenotype//0002088 // lens development in camera-type eye // inferred from mutant phenotype//0002093 // auditory receptor cell morphog                            |
| 146.86583          | 69.325676         | NM_001013013          |               | 0.004717326  | -2.15               | <b>Hdrh3c</b>        | dehydrogenase/reductase (SDR family) member 7C                                                  | 0008152 // metabolic process // inferred from electronic annotation//0010880 // regulation of release of sequestered calcium ion into cytosol by sarcoplasmic reticulum // inferred from direct ass                   |
| 1250.5642          | 582.11584         | NM_178738//XM_0061    |               | 0.002778543  | -2.15               | <b>Pssr35</b>        | protease, serine 35                                                                             | 0006508 // proteolysis // inferred from electronic annotation                                                                                                                                                         |
| 112.65766          | 52.04719          | NM_001042767//NM_1    |               | 0.009778603  | -2.16               | <b>Proc</b>          | protein C                                                                                       | 0006508 // proteolysis // inferred from electronic annotation//0007596 // blood coagulation // inferred from electronic annotation//0007599 // hemostasis // inferred from electronic annotation                      |
| 906.5109           | 408.92502         | NM_007428             |               | 7.77E-04     | -2.22               | <b>Act</b>           | angiotensinogen (serpin peptidase inhibitor, clade A, member 8)                                 | 0001545 // ovarian follicle rupture // inferred from mutant phenotype//0001568 // blood vessel development // inferred from mutant phenotype//0001658 // branching involved in ureteric bud n                         |
| 158.79066          | 226.7493          | NM_133977             |               | 0.003455162  | -2.22               | <b>Tjf1</b>          | transformin                                                                                     | 0006810 // transport // inferred from electronic annotation//0006811 // ion transport // inferred from electronic annotation//0006826 // ion transport // inferred from mutant phenotype//0006955                     |
| 158.79066          | 69.040665         | NM_018816             |               | 0.008245284  | -2.30               | <b>Apom</b>          | apolipoprotein M                                                                                | 0006810 // transport // inferred from electronic annotation//0006869 // lipid transport // inferred from electronic annotation//0009749 // response to glucose // inferred from electronic annotat                    |
| 270.4098           | 117.547455        | NM_008878             |               | 0.007576522  | -2.30               | <b>Serpind2</b>      | serpin (or cysteine) peptidase inhibitor, clade F, member 2                                     | 0002034 // regulation of blood vessel size by renin-angiotensin // inferred from mutant phenotype//0006953 // acute-phase response // inferred from electronic annotation//0010033 // glu                             |
| 1008.39905         | 436.82083         | NM_001159487//NM_1    |               | 0.006665224  | -2.31               | <b>Rbp4</b>          | retinol binding protein 4, plasma                                                               | 0001654 // eye development // inferred from mutant phenotype//0001654 // eye development // not recorded//0006094 // gluconeogenesis // inferred from mutant phenotype//0006094 // glu                                |
| 38.062843          | 16.056923         | NM_010001             |               | 0.001597849  | -2.37               | <b>Cyp2c37</b>       | cytochrome P450, family 2, subfamily c, polypeptide 37                                          | 0006885 // xenobiotic metabolic process // not recorded//0019373 // eopogenase P450 pathway // not recorded//0042738 // exogenous drug catabolic process // not recorded//0055114 // oxi                              |
| 41.417965          | 17.426592         | NM_020495//NM_178     |               | 0.00423561   | -2.38               | <b>Slc10a2</b>       | solute carrier organic anion transporter family, member 12a                                     | 0001889 // liver development // inferred from electronic annotation//0006810 // transport // inferred from electronic annotation//0006811 // ion transport // inferred from electronic annotat                        |
| 80.86726           | 32.40442          | NM_023383             |               | 0.008065633  | -2.40               | <b>Aoad</b>          | arylateamide deacetylase (esterase)                                                             | 0008152 // metabolic process // inferred from electronic annotation//0010898 // positive regulation of triglyceride catabolic process // inferred from direct assay                                                   |
| 34.048435          | 13.5257           |                       |               | 0.003113491  | -2.52               | <b>Al19A470</b>      | expressed sequence AL19A470                                                                     |                                                                                                                                                                                                                       |
| 62.197208          | 24.190928         | NM_007818             |               | 0.005114157  | -2.57               | <b>Cyp51b1</b>       | cytochrome P450, family 5, subfamily a, polypeptide 11                                          | 0005114 // steroid biosynthesis // not recorded//004863 // epoxide regulation // inferred from electronic annotation//004873 // negative regulation by heat of viral repl                                             |
| 400.89282          | 155.4179          | NM_010859             |               | 2.95E-04     | -2.58               | <b>Alyf3</b>         | myosin, light polypeptide 3                                                                     | 0008152 // metabolic process // inferred from electronic annotation//0009813 // flavonoid biosynthetic process // not recorded//0032870 // cellular response to hormone stimulus // not recorde                       |
| 48.445793          | 18.405342         | NM_153598             |               | 0.002529251  | -2.63               | <b>Ugt2b34</b>       | UDP glucuronosyltransferase 2 family, polypeptide B34                                           | 0008152 // metabolic process // inferred from electronic annotation//0009813 // flavonoid biosynthetic process // not recorded//0032870 // cellular response to hormone stimulus // not recorde                       |
| 27.27758           | 10.32527          | NM_009467             |               | 0.004846289  | -2.64               | <b>Ugt2b5</b>        |                                                                                                 |                                                                                                                                                                                                                       |

| [CH/HeN, Air][raw] | [CH/HeN, O2][raw] | RefSeq Transcript ID | p           | FC (Air:O2 at PND5) | Gene Symbol                 | Gene Title                                                                                | Gene Ontology Biological Process                                                                                                                                                                     |
|--------------------|-------------------|----------------------|-------------|---------------------|-----------------------------|-------------------------------------------------------------------------------------------|------------------------------------------------------------------------------------------------------------------------------------------------------------------------------------------------------|
| 511.79596          | 97.485985         | NM_007443            | 0.005793012 | -5.25               | <b>Ambp</b>                 | alpha 1 microglobulin/bikunin                                                             | 0010466 // negative regulation of peptidase activity // inferred from electronic annotation//0010951 // negative regulation of endopeptidase activity // not recorded//0018298 // protein-chromo     |
| 129.119            | 23.872452         | NM_019775            | 0.006770643 | -5.41               | <b>Cpb2</b>                 | carboxypeptidase B2 (plasma)                                                              | 0003331 // positive regulation of extracellular matrix constituent secretion // not recorded//0006508 // proteolysis // not recorded//0007596 // blood coagulation // inferred from electronic ann   |
| 736.41583          | 134.9244          | NM_019395//XM_0111   | 0.003684547 | -5.46               | <b>Fbp1</b>                 | fructose biphosphatase 1                                                                  | 0005975 // carbohydrate metabolic process // not recorded//0006002 // fructose 6-phosphate metabolic process // not recorded//0006094 // gluconeogenesis // not recorded//0006111 // regu            |
| 469.72153          | 80.4534           | NM_008407//XM_006    | 0.003136996 | -5.59               | <b>Ith3</b>                 | inter-alpha trypsin inhibitor, heavy chain 3                                              | 0010466 // negative regulation of peptidase activity // inferred from electronic annotation//0010951 // negative regulation of endopeptidase activity // inferred from electronic annotation//0030   |
| 615.0215           | 109.01663         | NM_013475//XM_006    | 0.0020096   | -5.64               | <b>Apob</b>                 | apolipoprotein H                                                                          | 0001937 // negative regulation of endothelial cell proliferation // not recorded//0006541 // triglyceride metabolic process // not recorded//0007596 // blood coagulation // not recorded//00075     |
| 5225.318           | 858.9625          | NM_007423            | 0.001240295 | -6.08               | <b>Alf</b>                  | alpha fetoprotein                                                                         | 0001542 // ovulation from ovarian follicle // inferred from mutant phenotype//0001889 // liver development // inferred from electronic annotation//0006810 // transport // inferred from electro     |
| 1068.612           | 174.232           | NM_001305549//NM_I   | 0.001337639 | -6.13               | <b>Apoo2</b>                | apolipoprotein A-II                                                                       | 0002526 // acute inflammatory response // inferred from electronic annotation//0002740 // negative regulation of cytokine secretion involved in immune response // not recorded//0006457 // p        |
| 128.37373          | 20.784555         | NM_029562//XM_006    | 0.001377294 | -6.18               | <b>Cyp2d26</b>              | cytochrome P450, family 2, subfamily d, polypeptide 26                                    | 0006805 // xenobiotic metabolic process // not recorded//0007565 // female pregnancy // inferred from electronic annotation//0019369 // arachidonic acid metabolic process // not recorded//0        |
| 408.96286          | 63.600693         | NM_080844//XM_006    | 0.001862161 | -6.43               | <b>Serpinc1</b>             | serine (or cysteine) peptidase inhibitor, clade C (antithrombin), member 1                | 0007584 // response to nutrient // not recorded//0007596 // blood coagulation // inferred from electronic annotation//0007599 // hemostasis // inferred from electronic annotation//0010466 //       |
| 758.61774          | 117.43251         | NM_008877            | 0.001870046 | -6.46               | <b>Plg</b>                  | plasminogen                                                                               | 0006508 // proteolysis // inferred from electronic annotation//0007596 // blood coagulation // not recorded//0007599 // hemostasis // inferred from electronic annotation//0010812 // negativ        |
| 399.31967          | 61.641228         | NM_175628//XM_0111   | 0.002430989 | -6.48               | <b>Azm</b>                  | alpha-2-macroglobulin                                                                     | 0001869 // negative regulation of complement activation, lectin pathway // not recorded//0007565 // female pregnancy // inferred from electronic annotation//0010466 // negative regulation of       |
| 611.8743           | 92.97415          | NM_016668            | 0.0029483   | -6.58               | <b>Bhmt</b>                 | betaine-homocysteine methyltransferase                                                    | 0006479 // protein methylation // not recorded//0006577 // amino-acid betaine metabolic process // not recorded//0006579 // amino-acid betaine catabolic process // inferred from electronic a       |
| 10772.42           | 1635.3412         | NM_009564            | 0.002354565 | -6.59               | <b>Alb</b>                  | albumin                                                                                   | 0001895 // retina homeostasis // inferred from electronic annotation//0006810 // transport // inferred from electronic annotation//0009267 // cellular response to starvation // not recorded//0     |
| 484.14145          | 72.10355          | NM_144903            | 0.003056649 | -6.71               | <b>Aldob</b>                | aldolase B, fructose-bisphosphate                                                         | 0001889 // liver development // inferred from electronic annotation//0006000 // fructose metabolic process // not recorded//0006096 // glycolytic process // not recorded//0006116 // NADH o         |
| 394.76944          | 58.08626          | NM_008341            | 0.002247223 | -6.80               | <b>Igfbp1</b>               | insulin-like growth factor binding protein 1                                              | 0001558 // regulation of cell growth // inferred from electronic annotation//0008286 // insulin receptor signaling pathway // inferred from electronic annotation//0030307 // positive regulati      |
| 335.13254          | 49.025208         | NM_133997            | 0.001651755 | -6.84               | <b>Apof</b>                 | apolipoprotein F                                                                          | 0006629 // lipid metabolic process // inferred from electronic annotation//0006641 // triglyceride metabolic process // inferred from mutant phenotype//0006810 // transport // inferred from el     |
| 489.39594          | 69.592            | NM_008096            | 9.97E-04    | -7.03               | <b>Gc</b>                   | group specific component                                                                  | 0006810 // transport // inferred from electronic annotation//0007565 // female pregnancy // inferred from electronic annotation//0007595 // lactation // inferred from electronic annotation//0      |
| 392.33728          | 54.011658         | NM_001102411//NM_I   | 0.00232564  | -7.26               | <b>Kng1</b>                 | kininogen 1                                                                               | 0006954 // inflammatory response // inferred from electronic annotation//0007204 // positive regulation of cytosolic calcium ion concentration // --//0007596 // blood coagulation // inferred fr    |
| 763.2383           | 98.7395           | NM_001080809//XM_C   | 0.002999039 | -7.73               | <b>Cps1</b>                 | carbamoyl-phosphate synthetase 1                                                          | 0000050 // urea cycle // not recorded//0000050 // urea cycle // inferred by curator//0001889 // liver development // inferred from electronic annotation//0005980 // glycogen catabolic proces       |
| 861.95667          | 109.99669         | NM_001276449//NM_I   | 0.002829061 | -7.84               | <b>Ahsg</b>                 | alpha-2-HS-glycoprotein                                                                   | 0001503 // ossification // inferred from direct assay//0006461 // protein complex assembly // not recorded//0006953 // acute-phase response // not recorded//0008584 // male gonad develop           |
| 421.03027          | 47.93317          | NM_017399            | 0.001678601 | -8.78               | <b>Fbp1</b>                 | fatty acid binding protein 1, liver                                                       | 0002230 // positive regulation of defense response to virus by host // not recorded//0006810 // transport // inferred from electronic annotation//0008284 // positive regulation of cell proliferati |
| 1738.2124          | 195.41092         | NM_009692            | 0.001586324 | -8.90               | <b>Apoo1</b>                | apolipoprotein A-I                                                                        | 0001932 // regulation of protein phosphorylation // inferred from direct assay//0001935 // endothelial cell proliferation // inferred from mutant phenotype//0002740 // negative regulation of cyt   |
| 2337.167           | 257.77368         | NM_013697            | 0.001559754 | -9.07               | <b>Tr</b>                   | transthyretin                                                                             | 0006810 // transport // inferred from electronic annotation//0042572 // retinol metabolic process // not recorded//00070327 // thyroid hormone transport // inferred from electronic annotation      |
| 1634.0963          | 177.98416         | NM_001317105//NM_I   | 0.002402098 | -9.18               | <b>Fgg</b>                  | fibriogen gamma chain                                                                     | 0002250 // adaptive immune response // inferred from electronic annotation//0002376 // immune system process // inferred from electronic annotation//0007160 // cell-matrix adhesion // not r        |
| 481.74808          | 49.186993         | NM_007376            | 0.001039365 | -9.79               | <b>Pfp</b>                  | pregnancy zone protein                                                                    | 0007566 // embryo implantation // inferred from genetic interaction//0010466 // negative regulation of peptidase activity // inferred from electronic annotation//0010951 // negative regulati       |
| 1225.3838          | 123.2816          | NM_009245            | 0.001811876 | -9.94               | <b>Serpinc1c</b>            | serine (or cysteine) peptidase inhibitor, clade A, member 1C                              | 0010466 // negative regulation of peptidase activity // inferred from electronic annotation//0010951 // negative regulation of endopeptidase activity // not recorded//0034097 // response to cyt    |
| 981.44305          | 97.02705          | NM_181849            | 0.001676218 | -10.12              | <b>Fgb</b>                  | fibriogen beta chain                                                                      | 0002250 // adaptive immune response // inferred from electronic annotation//0002376 // immune system process // inferred from electronic annotation//0007160 // cell-matrix adhesion // not r        |
| 892.4763           | 87.18443          | NM_009244//XM_006    | 0.001580199 | -10.24              | <b>Serpinc1b//Serpinc1e</b> | serine (or cysteine) peptidase inhibitor, clade A, member 1B//serine (or cysteine) pepti  | 0001701 // in utero embryonic development // inferred from mutant phenotype//0006487 // protein N-linked glycosylation // inferred from direct assay//0006953 // acute-phase response // infe        |
| 1249.6205          | 121.73912         | NM_00111048//NM_I    | 0.002412222 | -10.26              | <b>Fga</b>                  | fibriogen alpha chain                                                                     | 0002250 // adaptive immune response // inferred from electronic annotation//0002376 // immune system process // inferred from electronic annotation//0006461 // protein complex assembly // i        |
| 892.4203           | 63.98877          | NM_001252569//NM_I   | 0.001010352 | -13.95              | <b>Serpinc1a//Serpinc1d</b> | serine (or cysteine) peptidase inhibitor, clade A, member 1A//serine (or cysteine) peptic | 0001701 // in utero embryonic development // inferred from mutant phenotype//0006487 // protein N-linked glycosylation // inferred from direct assay//0006953 // acute-phase response // infe        |
