# Supplementary material for: Glutathione reductase deficiency alters lung development and hyperoxic responses in neonatal mice
Source: PubMed Central journal article supplement — Redox Biol. 2020 Nov 13;38:101797. doi: 10.1016/j.redox.2020.101797 (PMC7708869; doi:10.1016/j.redox.2020.101797), 2020-11-13
Supplement: mmc6.pdf [file mmc6.pdf]

Table S6. Lung genes (n=567) significantly changed by hyperoxia (O2) in glutathione reductase-deficient (Gsr-KO) mouse neonates at PND5 (moderated t-test, p < 0.01).

Blue(-): fold decreased by O2. Red(+): fold increased by O2.

| [Gsr-KO, Air][raw] | [Gsr-KO, O2][raw] | RefSeq                | Transcript ID | p        | FC (Air: O2 at PND5) | Gene Symbol             | Gene Title                                                    | Gene Ontology Biological Process                                                                                                                                            |
|--------------------|-------------------|-----------------------|---------------|----------|----------------------|-------------------------|---------------------------------------------------------------|-----------------------------------------------------------------------------------------------------------------------------------------------------------------------------|
| 76.9784            | 4483.964          | NM_009394             |               | 4.85E-06 | 57.44                | <b>Tnnc2</b>            | troponin C2, fast                                             | 0003009 // skeletal muscle contraction // not recorded                                                                                                                      |
| 58.468548          | 2832.6384         | NM_177369             |               | 3.90E-08 | 47.75                | <b>Myh8</b>             | myosin, heavy polypeptide 8, skeletal muscle, perinatal       | 0003009 // skeletal muscle contraction // not recorded//0006936 // muscle contraction // ---//0008152 // metabolic process // inferred from electronic annotation//0014     |
| 24.953693          | 863.6152          | NM_001313949//NM_     |               | 2.90E-07 | 34.24                | <b>Krt13</b>            | keratin 13                                                    | 0007010 // cytoskeleton organization // not recorded//0009314 // response to radiation // inferred from electronic annotation//0043587 // tongue morphogenesis // infe      |
| 95.823166          | 3093.5344         | NM_016754//XM_0061    |               | 1.85E-04 | 32.25                | <b>Myh1f</b>            | myosin light chain, phosphorylatable, fast skeletal muscle    | 0006955 // immune response // inferred from electronic annotation//0007519 // skeletal muscle tissue development // inferred from mutant phenotype                          |
| 50.705944          | 1179.135          | NM_001163664//NM_     |               | 7.71E-06 | 22.80                | <b>Tnnt3</b>            | troponin T3, skeletal, fast                                   | 0003009 // skeletal muscle contraction // not recorded//0006937 // regulation of muscle contraction // inferred from electronic annotation//0006942 // regulation of stri   |
| 338.56406          | 7321.125          | NM_001272041//NM_     |               | 3.16E-06 | 21.43                | <b>Acta1</b>            | actin, alpha 1, skeletal muscle                               | 0009612 // response to mechanical stimulus // inferred from electronic annotation//0009991 // response to extracellular stimulus // inferred from electronic annotation//   |
| 203.46117          | 4223.8726         | NM_001113387//NM_     |               | 3.68E-04 | 20.41                | <b>Myl1</b>             | myosin, light polypeptide 1                                   | 0006936 // muscle contraction // not recorded//0060048 // cardiac muscle contraction // not recorded                                                                        |
| 92.97833           | 1910.9205         | NM_008475             |               | 1.66E-06 | 20.20                | <b>Krt4</b>             | keratin 4                                                     | 0007010 // cytoskeleton organization // not recorded//0009790 // embryo development // traceable author statement//0030855 // epithelial cell differentiation // infer      |
| 66.04276           | 1225.579          | NM_001099635//XM_0061 |               | 0.003312 | 18.38                | <b>Myh3</b>             | myosin, heavy polypeptide 3, skeletal muscle, embryonic       | 0003009 // skeletal muscle contraction // not recorded//0046034 // ATP metabolic process // not recorded                                                                    |
| 22.856401          | 396.6772          | NM_010889//XM_0061    |               | 6.74E-06 | 16.71                | <b>Neb</b>              | nebulin                                                       | 0030832 // regulation of actin filament length // traceable author statement//0045214 // sarcomere organization // traceable author statement                               |
| 17.903265          | 310.30438         | NM_001290389//NM_     |               | 2.30E-06 | 16.26                | <b>Atp1b4</b>           | ATPase, (Na+K+) transporting, beta 4 polypeptide              | 0006351 // transcription, DNA-templated // inferred from electronic annotation//0006355 // regulation of transcription, DNA-templated // not recorded//0006810 // tran      |
| 26.560461          | 388.2157          | NM_030679//NM_010     |               | 9.14E-07 | 14.45                | <b>Myh11//Myh4</b>      | myosin, heavy polypeptide 1, skeletal muscle, adult//my       | 0006936 // muscle contraction // not recorded//0008152 // metabolic process // inferred from electronic annotation//0003009 // skeletal muscle contraction // inferred f    |
| 21.769707          | 228.27621         | NM_001033621//XM_0061 |               | 7.52E-06 | 10.39                | <b>Myot</b>             | myotilin                                                      |                                                                                                                                                                             |
| 111.290146         | 1123.4584         | NM_009405//XM_0061    |               | 7.68E-06 | 9.88                 | <b>Tnni2</b>            | troponin I, skeletal, fast 2                                  | 0003009 // skeletal muscle contraction // not recorded//0006937 // regulation of muscle contraction // not recorded//0045893 // positive regulation of transcription, DN    |
| 30.852324          | 274.40927         | NM_001121769//XM_0061 |               | 7.87E-04 | 8.76                 | <b>Tceal7</b>           | transcription elongation factor A (SII)-like 7                | 0006351 // transcription, DNA-templated // inferred from electronic annotation//0006355 // regulation of transcription, DNA-templated // inferred from electronic annota    |
| 17.78789           | 143.10919         | NM_001081123//XM_0061 |               | 1.79E-06 | 7.66                 | <b>Arhgap36</b>         | Rho GTPase activating protein 36                              | 0007165 // signal transduction // inferred from electronic annotation//0043547 // positive regulation of GTPase activity // inferred from electronic annotation             |
| 66.22598           | 523.25354         | NM_027416             |               | 1.13E-04 | 7.66                 | <b>Calml3</b>           | calmodulin-like 3                                             |                                                                                                                                                                             |
| 115.31618          | 804.8055          | NM_007606//XM_011     |               | 0.001421 | 6.87                 | <b>Car3</b>             | carbonic anhydrase 3                                          | 0006470 // protein dephosphorylation // inferred from electronic annotation//0006730 // one-carbon metabolic process // inferred from electronic annotation//0006979        |
| 49.759773          | 345.17355         | NM_013456             |               | 1.54E-05 | 6.78                 | <b>Actn3</b>            | actinin alpha 3                                               | 0001649 // osteoblast differentiation // inferred from mutant phenotype//0006936 // muscle contraction // inferred from direct assay//0014728 // regulation of the force    |
| 44.184513          | 279.04303         | NM_001252372//NM_     |               | 1.89E-06 | 6.20                 | <b>Mybp1c</b>           | myosin binding protein C, slow-type                           | 0006936 // muscle contraction // inferred from direct assay//1903955 // positive regulation of protein targeting to mitochondrion // not recorded                           |
| 59.477646          | 348.76804         | NM_031189             |               | 0.003989 | 6.20                 | <b>Myog</b>             | myogenin                                                      | 0001503 // ossification // inferred from mutant phenotype//0006351 // transcription, DNA-templated // inferred from electronic annotation//0006355 // regulation of tra     |
| 12.981329          | 72.490616         | NM_001033239          |               | 7.87E-05 | 5.49                 | <b>Csta1</b>            | cystatin A1                                                   | 0010466 // negative regulation of peptidase activity // inferred from electronic annotation//0010951 // negative regulation of endopeptidase activity // ---//0010951 // ne |
| 306.33025          | 1702.0999         | NM_008469             |               | 0.004839 | 5.46                 | <b>Krt15</b>            | keratin 15                                                    | 0098779 // mitophagy in response to mitochondrial depolarization // not recorded                                                                                            |
| 32.838654          | 160.28629         | NM_029569//XM_0061    |               | 1.35E-05 | 4.89                 | <b>Asb5</b>             | ankyrin repeat and SOCS box-containing 5                      | 0016567 // protein ubiquitination // inferred from electronic annotation//0035556 // intracellular signal transduction // inferred from electronic annotation               |
| 17.86937           | 696.1657          | NM_007504//XM_0061    |               | 2.25E-06 | 4.87                 | <b>Atp2a1</b>           | ATPase, Ca++ transporting, cardiac muscle, fast twitch 1      | 0006810 // transport // inferred from electronic annotation//0006811 // ion transport // inferred from electronic annotation//0006816 // calcium ion transport // not rec   |
| 62.09625           | 308.34082         | NM_001081087          |               | 0.004885 | 4.81                 | <b>Klhl41</b>           | kelch-like 41                                                 | 0016567 // protein ubiquitination // not recorded//0030239 // myofibril assembly // inferred from mutant phenotype//0031275 // regulation of lateral pseudopodium ass       |
| 56.34639           | 260.24808         | NM_009141             |               | 0.003056 | 4.54                 | <b>Cxcl5</b>            | chemokine (C-X-C motif) ligand 5                              | 0001776 // leukocyte homeostasis // inferred from mutant phenotype//0001816 // cytokine production // not recorded//0002690 // positive regulation of leukocyte chem        |
| 71.152824          | 321.5579          | NM_028216             |               | 5.67E-04 | 4.41                 | <b>Psc</b>              | prostate stem cell antigen                                    |                                                                                                                                                                             |
| 32.55182           | 141.47806         | NM_007582             |               | 1.32E-04 | 4.36                 | <b>Cacng1</b>           | calcium channel, voltage-dependent, gamma subunit 1           | 0006810 // transport // inferred from electronic annotation//0006811 // ion transport // inferred from electronic annotation//0006816 // calcium ion transport // inferred  |
| 258.07495          | 1131.0095         | NM_001164787//NM_     |               | 1.07E-04 | 4.28                 | <b>Sprr2a1//Sprr2a2</b> | small proline-rich protein 2A1//small proline-rich protein    | 0008360 // regulation of cell shape // traceable author statement//0008544 // epidermis development // non-traceable author statement//0018149 // peptide cross-linki       |
| 118.66843          | 514.4448          | NM_001101605//NM_     |               | 0.001112 | 4.17                 | <b>Ifit1b1</b>          | interferon induced protein with tetratricopeptide repeats     | 0051607 // defense response to virus // not recorded//0060337 // tyrosine kinase signaling pathway // not recorded                                                          |
| 44.905346          | 188.82568         | NM_028798             |               | 1.54E-04 | 4.14                 | <b>Crc1</b>             | cysteine-rich C-terminal 1                                    | 0018149 // peptide cross-linking // not recorded//0030216 // keratinocyte differentiation // not recorded                                                                   |
| 52.8892            | 217.84296         | NM_001199556//NM_     |               | 3.08E-04 | 4.03                 | <b>AWS51984</b>         | expressed sequence AWS51984                                   | 0055007 // cardiac muscle cell differentiation // inferred from mutant phenotype//0060923 // cardiac muscle cell fate commitment // inferred from genetic interaction       |
| 30.585264          | 118.26599         | NM_008651//XM_0061    |               | 7.45E-05 | 3.89                 | <b>Myf6</b>             | myogenic factor 6                                             | 0001756 // somitogenesis // inferred from mutant phenotype//0006355 // regulation of transcription, DNA-templated // inferred from electronic annotation//0006357 //        |
| 28.39306           | 108.52695         | NM_009109//XM_0061    |               | 2.89E-05 | 3.86                 | <b>Ryr1</b>             | ryanodine receptor 1, skeletal muscle                         | 0001666 // response to hypoxia // not recorded//0003151 // outflow tract morphogenesis // inferred from mutant phenotype//0006810 // transport // inferred from elec        |
| 76.60803           | 288.5503          | NM_008476             |               | 1.10E-04 | 3.67                 | <b>Krt6a</b>            | keratin 6A                                                    | 0002009 // morphogenesis of an epithelium // inferred from genetic interaction//0002009 // morphogenesis of an epithelium // inferred from mutant phenotype//00160          |
| 57.28121           | 213.16151         | NM_021508             |               | 8.82E-06 | 3.63                 | <b>Myoz1</b>            | myozenin 1                                                    |                                                                                                                                                                             |
| 43.795063          | 158.04631         | NM_173385             |               | 0.006373 | 3.59                 | <b>Clp</b>              | cartilage intermediate layer protein, nucleotide pyrophos     | 0043569 // negative regulation of insulin-like growth factor receptor signaling pathway // not recorded                                                                     |
| 107.61155          | 400.9013          | NM_026841             |               | 6.13E-05 | 3.58                 | <b>Prr32</b>            | proline rich 32                                               |                                                                                                                                                                             |
| 38.48617           | 136.62178         | NM_013505//XM_0061    |               | 3.40E-05 | 3.53                 | <b>Dsc2</b>             | desmocollin 2                                                 | 0007155 // cell adhesion // inferred from electronic annotation//0007156 // homophilic cell adhesion via plasma membrane adhesion molecules // inferred from electroni      |
| 60.9142            | 196.92682         | NM_016749//XM_0061    |               | 0.003253 | 3.17                 | <b>Mybph</b>            | myosin binding protein H                                      | 0007155 // cell adhesion // inferred from electronic annotation                                                                                                             |
| 45.98375           | 143.36182         | NM_007812//NM_009     |               | 1.09E-04 | 3.10                 | <b>Cyp2a4//Cyp2a5</b>   | cytochrome P450, family 2, subfamily a, polypeptide 4//c      | 0006805 // xenobiotic metabolic process // not recorded//0009804 // coumarin metabolic process // not recorded//0019373 // epoxygenase P450 pathway // not record           |
| 131.00752          | 412.9011          | NM_013712//XM_011     |               | 7.68E-04 | 3.06                 | <b>Itgb1bp2</b>         | integrin beta 1 binding protein 2                             |                                                                                                                                                                             |
| 97.62915           | 308.56287         | NM_139134//XM_0061    |               | 1.67E-04 | 3.05                 | <b>Chodl</b>            | chondrolectin                                                 | 0010975 // regulation of neuron projection development // inferred from genetic interaction                                                                                 |
| 199.118            | 612.06366         | NM_008522             |               | 5.29E-04 | 2.97                 | <b>Ltf</b>              | lactotransferrin                                              | 0001503 // ossification // inferred from electronic annotation//0001817 // regulation of cytokine production // not recorded//0001895 // retina homeostasis // inferred fr  |
| 62.484314          | 188.89784         | NM_001081375//NM_     |               | 8.48E-04 | 2.97                 | <b>Cnfn</b>             | cornifelin                                                    | 0031424 // keratinization // inferred from electronic annotation                                                                                                            |
| 26.90576           | 78.44409          | NM_001033131          |               | 2.15E-05 | 2.96                 | <b>Krtadp</b>           | keratinocyte differentiation associated protein               | 0008544 // epidermis development // not recorded//0030154 // cell differentiation // inferred from electronic annotation                                                    |
| 25.22052           | 73.11003          | NM_001174170//NM_     |               | 6.30E-05 | 2.96                 | <b>Serpinc2</b>         | serine (or cysteine) peptidase inhibitor, clade B, member     | 0010466 // negative regulation of peptidase activity // inferred from electronic annotation//0010951 // negative regulation of endopeptidase activity // not recorded//004  |
| 29.133148          | 82.44814          | NM_001081157//XM_0061 |               | 0.001746 | 2.87                 | <b>Lmod3</b>            | leiomodin 3 (fetal)                                           | 0006936 // muscle contraction // not recorded//0007015 // actin filament organization // not recorded//0030239 // myofibril assembly // not recorded//0051694 // poin       |
| 16.71076           | 47.89749          | NM_011472             |               | 0.006858 | 2.80                 | <b>Sprr2f</b>           | small proline-rich protein 2F                                 | 0008544 // epidermis development // non-traceable author statement//0018149 // peptide cross-linking // not recorded//0030216 // keratinocyte differentiation // not r      |
| 51.451138          | 141.78748         | NM_028202//XM_0061    |               | 2.46E-04 | 2.73                 | <b>Klhl40</b>           | kelch-like 40                                                 | 0007275 // multicellular organismal development // inferred from electronic annotation//0016567 // protein ubiquitination // ---//0031397 // negative regulation of prote   |
| 128.54233          | 363.57333         | NM_026414             |               | 2.55E-04 | 2.71                 | <b>Asprv1</b>           | aspartic peptidase, retroviral-like 1                         | 0006508 // proteolysis // inferred from electronic annotation//0016485 // protein processing // inferred from direct assay//0016485 // protein processing // not recorded   |
| 250.01558          | 683.995           | NM_009813             |               | 2.24E-04 | 2.68                 | <b>Casq1</b>            | calsequestrin 1                                               | 0006937 // regulation of muscle contraction // traceable author statement//0007029 // endoplasmic reticulum organization // inferred from mutant phenotype//0007515         |
| 58.277485          | 158.10065         | NM_001007580//XM_0061 |               | 9.18E-04 | 2.67                 | <b>Fndc3c1</b>          | fibronectin type III domain containing 3C1                    |                                                                                                                                                                             |
| 62.840107          | 167.70041         | NM_146189//XM_0061    |               | 2.34E-04 | 2.62                 | <b>Mybp2c</b>           | myosin binding protein C, fast-type 2                         | 0006936 // muscle contraction // inferred from direct assay//0007155 // cell adhesion // inferred from electronic annotation                                                |
| 21.105312          | 53.855396         | NM_025867             |               | 8.91E-05 | 2.55                 | <b>Serpinc1</b>         | serine (or cysteine) peptidase inhibitor, clade B (ovalbumin) | 0010466 // negative regulation of peptidase activity // inferred from electronic annotation//0010951 // negative regulation of endopeptidase activity // not recorded       |
| 67.41971           | 173.87897         | NM_009264             |               | 0.00237  | 2.53                 | <b>Sprr1a</b>           | small proline-rich protein 1A                                 | 0018149 // peptide cross-linking // not recorded//0030216 // keratinocyte differentiation // not recorded//0031424 // keratinization // inferred from electronic annotatio  |
| 12.686517          | 32.053776         | NM_001033233//XM_0061 |               | 5.09E-04 | 2.40                 | <b>Tmprss11a</b>        | transmembrane protease, serine 11a                            | 0006508 // proteolysis // inferred from electronic annotation//0007049 // cell cycle // inferred from electronic annotation                                                 |
| 246.73846          | 604.106           | NM_009694             |               | 0.009031 | 2.39                 | <b>Apobec2</b>          | apolipoprotein B mRNA editing enzyme, catalytic polypep       | 0006397 // mRNA processing // inferred from electronic annotation//0016556 // mRNA modification // inferred from mutant phenotype//0008111 // DNA demethylation             |
| 528.7196           | 1264.5781         | NM_009922//XM_0061    |               | 0.001964 | 2.39                 | <b>Cnn1</b>             | calponin 1                                                    | 0031032 // actomyosin structure organization // inferred from electronic annotation                                                                                         |
| 48.584885          | 115.7181          | NM_001313701//NM_     |               | 2.17E-04 | 2.38                 | <b>Pkp1</b>             | plakophilin 1                                                 | 0007155 // cell adhesion // inferred from electronic annotation//0016337 // single organismal cell-cell adhesion // inferred from electronic annotation//0045110 // interr  |
| 24.725973          | 57.088352         | NM_001081023//NM_     |               | 0.004491 | 2.37                 | <b>Cacna1s</b>          | calcium channel, voltage-dependent, L type, alpha 1S sub      | 0001501 // skeletal system development // inferred from mutant phenotype//0002074 // extracellular skeletal muscle development // inferred from mutant phenotype//00        |
| 48.330772          | 113.52331         | NM_001033303//XM_0061 |               | 7.24E-05 | 2.35                 | <b>Ampd1</b>            | adenosine monophosphate deaminase 1                           | 0009117 // nucleotide metabolic process // inferred from electronic annotation//0009168 // purine ribonucleoside monophosphate biosynthetic process // inferred from e      |
| 112.7098           | 271.40237         | NM_027011             |               | 1.87E-05 | 2.31                 | <b>Krt5</b>             | keratin 5                                                     |                                                                                                                                                                             |
| 65.316025          | 152.30411         | NM_027126//XM_0061    |               | 2.64E-04 | 2.30                 | <b>Hfe2</b>             | hemochromatosis type 2 (juvenile) (human homolog)             | 0000122 // negative regulation of transcription from RNA polymerase II promoter // inferred from mutant phenotype//0006879 // cellular iron ion homeostasis // inferred     |
| 65.18649           | 150.86432         | NM_001204427//NM_     |               | 0.002307 | 2.29                 | <b>Sprr3</b>            | small proline-rich protein 3                                  | 0018149 // peptide cross-linking // not recorded//0030216 // keratinocyte differentiation // not recorded//0031424 // keratinization // inferred from electronic annotatio  |
| 44.50794           | 100.58403         | NM_007389             |               | 0.001612 | 2.26                 | <b>Chrn4</b>            | cholinergic receptor, nicotinic, alpha polypeptide 1 (mus     | 0003009 // skeletal muscle contraction // not recorded//0006810 // transport // inferred from electronic annotation//0006811 // ion transport // inferred from electronic   |
| 78.13614           | 179.08975         | NM_001122683//NM_     |               | 2.00E-04 | 2.25                 | <b>Bdh1</b>             | 3-hydroxybutyrate dehydrogenase, type 1                       | 0008152 // metabolic process // inferred from electronic annotation//005114 // oxidation-reduction process // not recorded                                                  |
| 2106.3872          | 4656.372          | NM_002094             |               | 0.002094 | 2.18                 | <b>Gsto1</b>            | glutathione S-transferase omega 1                             | 0006749 // glutathione metabolic process // not recorded//0008152 // metabolic process // inferred from electronic annotation//0010880 // regulation of release of sequ     |
| 24.626236          | 53.256237         | NM_153179//XM_0061    |               | 0.008783 | 2.16                 | <b>Phkd1</b>            | polycystic kidney and hepatic disease 1                       | 0001822 // kidney development // inferred from direct assay//0006874 // cellular calcium ion homeostasis // not recorded//0008284 // positive regulation of cell prolifer   |
| 50.64267           | 108.13938         | XR_861642//XR_86895   |               | 0.004749 | 2.14                 | <b>Gm38785</b>          | predicted gene, 38785                                         |                                                                                                                                                                             |
| 75.6316            | 162.59714         | NM_016689             |               | 0.001552 | 2.11                 | <b>Aqp3</b>             | aquaporin 3                                                   | 0002684 // positive regulation of immune system process // not recorded//0006810 // transport // inferred from electronic annotation//0006833 // water transport // inf     |
| 17.868435          | 38.00067          | NM_009251//XM_0061    |               | 4.79E-04 | 2.11                 | <b>Serpinc5</b>         | serine (or cysteine) peptidase inhibitor, clade B, member     | 0002009 // morphogenesis of an epithelium // inferred from mutant phenotype//0010951 // negative regulation of endopeptidase activity // not recorded//0030198 // e         |
| 29.245455          | 59.957985         | NM_133743             |               | 4.09E-06 | 2.10                 | <b>Lypd3</b>            | Ly6/Plaur domain containing 3                                 | 0006928 // movement of cell or subcellular component // not recorded//0007160 // cell-matrix adhesion // not recorded                                                       |
| 24.89903           | 50.04128          | NM_175440//XM_011     |               | 0.002686 | 2.08                 | <b>Prss27</b>           | protease, serine 27                                           | 0006508 // proteolysis // inferred from electronic annotation                                                                                                               |
| 151.80606          | 326.8504          | NM_001005423//XM_0061 |               | 0.007568 | 2.06                 | <b>Mreg</b>             | melanoregulin                                                 | 0030318 // melanocyte differentiation // inferred from mutant phenotype//0032402 // melanosome transport // inferred from direct assay//0042640 // anagen // infer          |
| 53.20544           | 108.66783         | NM_001080995//NM_     |               | 0.008147 | 2.04                 | <b>Ddias</b>            | DNA damage-induced apoptosis suppressor                       | 0006915 // apoptotic process // inferred from electronic annotation//0006974 // cellular response to DNA damage stimulus // inferred from mutant phenotype//0007049         |

| Gene Symbol                 | Gene Title                                                         | Gene Ontology Biological Process                                                                                                                                                               |
|-----------------------------|--------------------------------------------------------------------|------------------------------------------------------------------------------------------------------------------------------------------------------------------------------------------------|
| <b>2.01 Trp63</b>           | transformation related protein 63                                  | 0000122 // negative regulation of transcription from RNA polymerase II promoter // inferred from direct assay//0000122 // negative regulation of transcription from RNA polymerase II promoter |
| <b>1.98 Krt6b</b>           | keratin 6B                                                         | 0002009 // morphogenesis of an epithelium // inferred from genetic interaction//00031424 // keratinization // inferred from genetic interaction//00045109 // intermediate                      |
| <b>1.98 Mylk4</b>           | myosin light chain kinase family, member 4                         | 0006468 // protein phosphorylation // inferred from electronic annotation//00016310 // phosphorylation // inferred from electronic annotation                                                  |
| <b>1.90 Eno3</b>            | enolase 3, beta subunit                                            | 0006095 // glycolytic process // inferred from electronic annotation//0007568 // aging // inferred from electronic annotation//00042493 // response to drug // inferred from                   |
| <b>1.96 Gm12300</b>         | predicted gene 12300                                               |                                                                                                                                                                                                |
| <b>1.94 Gatm</b>            | glycine amidinotransferase (L-arginine:glycine amidinotransferase) | 0006601 // creatine biosynthetic process // not recorded//0006979 // response to oxidative stress // inferred from electronic annotation//0007584 // response to nutrient                      |
| <b>1.91 Tcaal3//Tcaals5</b> | transcription elongation factor A (SII)-like 3//transcription      | 0006351 // transcription, DNA-templated // inferred from electronic annotation//0006355 // regulation of transcription, DNA-templated // inferred from electronic annotation                   |
| <b>1.90 Pitx1</b>           | forkhead-like homeodomain transcription factor 1                   | 0001501 // skeletal system development // inferred from mutant phenotype//0006351 // transcription, DNA-templated // inferred from electronic annotation//0006355 //                           |
| <b>1.87 Fst</b>             | follicistatin                                                      | 0000122 // negative regulation of transcription from RNA polymerase II promoter // not recorded//0001501 // skeletal system development // inferred from genetic interaction                   |
| <b>1.85 Vip</b>             | vasoactive intestinal polypeptide                                  | 0001878 // response to yeast // not recorded//0001938 // positive regulation of endothelial cell proliferation // not recorded//0007611 // learning or memory // not recorded                  |
| <b>1.85 Crym</b>            | crystallin, mu                                                     | 0000122 // negative regulation of transcription from RNA polymerase II promoter // not recorded//0006839 // mitochondrial transport // not recorded//0007605 // sense                          |
| <b>1.83 Myod1</b>           | myogenic differentiation 1                                         | 0000381 // regulation of alternative mRNA splicing, via spliceosome // inferred from direct assay//0000381 // regulation of alternative mRNA splicing, via spliceosome // in                   |
| <b>1.81 Alox15</b>          | arachidonate 15-lipoxygenase                                       | 0001503 // ossification // inferred from mutant phenotype//0002820 // negative regulation of adaptive immune response // inferred from mutant phenotype//0006629 //                            |
| <b>1.81 Rhov</b>            | ras homolog gene family, member V                                  | 0007165 // signal transduction // not recorded//0007264 // small GTPase mediated signal transduction // inferred from electronic annotation                                                    |
| <b>1.80 Ky</b>              | kyphoscoliosis septidase                                           | 0006508 // proteolysis // inferred from electronic annotation//0007517 // muscle organ development // inferred from mutant phenotype//0007528 // neuromuscular junction                        |
| <b>1.80 Col8a1</b>          | collagen, type VIII, alpha 1                                       | 0001525 // angiogenesis // inferred from electronic annotation//0007155 // cell adhesion // inferred from electronic annotation//0010811 // positive regulation of cell-cell                   |
| <b>1.76 Fbp2</b>            | fructose biphosphatase 2                                           | 0005975 // carbohydrate metabolic process // inferred from electronic annotation//0006094 // gluconeogenesis // not recorded//0006470 // protein dephosphorylation //                          |
| <b>1.75 Ecm1</b>            | extracellular matrix protein 1                                     | 0001503 // ossification // inferred from electronic annotation//0001525 // angiogenesis // inferred from electronic annotation//0001938 // positive regulation of endothelial                  |
| <b>1.69 Pdlim4</b>          | PDZ and LIM domain 4                                               | 0030036 // actin cytoskeleton organization // not recorded                                                                                                                                     |
| <b>1.68 Dck1</b>            | doublecortin-like kinase 1                                         | 0001764 // neuron migration // inferred from genetic interaction//0006468 // protein phosphorylation // inferred from electronic annotation//0007275 // multicellular or                       |
| <b>1.68 Hlr2</b>            | interleukin 1 receptor, type II                                    | 0019221 // cytokine-mediated signaling pathway // inferred from electronic annotation                                                                                                          |
| <b>1.68 Grh3</b>            | grainyhead-like 3 (Drosophila)                                     | 0001736 // establishment of planar polarity // inferred from genetic interaction//0001843 // neural tube closure // inferred from mutant phenotype//0006351 // transcrit                       |
| <b>1.67 Rrp12</b>           | ribosomal RNA processing 12 homolog (S. cerevisiae)                |                                                                                                                                                                                                |
| <b>1.66 Sostd1</b>          | serothionin domain containing 1                                    | 0007389 // pattern specification process // inferred from mutant phenotype//0010454 // negative regulation of cell fate commitment // inferred from mutant phenotype//                         |
| <b>1.66 Dapl1</b>           | death associated protein-like 1                                    | 0006915 // apoptotic process // inferred from electronic annotation//0010507 // negative regulation of autophagy // --//0030154 // cell differentiation // inferred from e                     |
| <b>1.66 Hs6st2</b>          | heparan sulfate 6-O-sulfotransferase 2                             | 0015015 // heparan sulfate proteoglycan biosynthetic process, enzymatic modification // inferred from direct assay                                                                             |
| <b>1.65 Hspa1b</b>          | heat shock protein 1B                                              | 0007339 // binding of sperm to zona pellucida // inferred from direct assay//0009408 // response to heat // inferred from direct assay//0043066 // negative regulation of                      |
| <b>1.64 Krt14//Krt17</b>    | keratin 14//keratin 17                                             | 0007568 // aging // not recorded//0010043 // response to zinc ion // inferred from electronic annotation//0010212 // response to ionizing radiation // inferred from elect                     |
| <b>1.63 Arpp21</b>          | cyclic AMP-regulated phosphoprotein, 21                            | 0034605 // cellular response to heat // inferred from direct assay                                                                                                                             |
| <b>1.62 Ache</b>            | acetylcholinesterase                                               | 0001919 // regulation of receptor recycling // inferred from mutant phenotype//0002076 // osteoblast development // inferred from electronic annotation//0006581 // in                         |
| <b>1.61 Sim2</b>            | single-minded homolog 2 (Drosophila)                               | 0000122 // negative regulation of transcription from RNA polymerase II promoter // inferred from genetic interaction//0006351 // transcription, DNA-templated // inferred                      |
| <b>1.60 Muc4</b>            | mucin 4                                                            | 0001953 // negative regulation of cell-matrix adhesion // not recorded//0002244 // hematopoietic progenitor cell differentiation // inferred from mutant phenotype//000                        |
| <b>1.58 Lgi2</b>            | leucine-rich repeat LGI family, member 2                           |                                                                                                                                                                                                |
| <b>1.53 Trim29</b>          | tripartite motif-containing 29                                     | 0000122 // negative regulation of transcription from RNA polymerase II promoter // inferred from genetic interaction//1900181 // negative regulation of protein localizat                      |
| <b>1.52 Serpinb1a</b>       | serine (or cysteine) peptidase inhibitor, clade B, member          | 0010466 // negative regulation of peptidase activity // inferred from electronic annotation//0010951 // negative regulation of endopeptidase activity // not recorded//00                      |
| <b>1.52 Pad1</b>            | peptidyl arginine deiminase, type I                                | 0018101 // protein cullination // not recorded                                                                                                                                                 |
| <b>1.52 Synpo2</b>          | synaptopodin 2                                                     |                                                                                                                                                                                                |
| <b>1.51 Gm94</b>            | predicted gene 94                                                  |                                                                                                                                                                                                |
| <b>1.51 Barx2</b>           | BarH-like homeobox 2                                               | 0000122 // negative regulation of transcription from RNA polymerase II promoter // inferred from direct assay//0001502 // cartilage condensation // inferred from direct a                     |
| <b>1.51 Upk3bl</b>          | uropaklin 3B-like                                                  | 0006979 // response to oxidative stress // inferred from electronic annotation//0005114 // oxidation-reduction process // inferred from electronic annotation                                  |
| <b>1.49 Gm8096//Phgdh</b>   | 3-phosphoglycerate dehydrogenase pseudogene//3-pho                 | 0006541 // glutamine metabolic process // inferred from mutant phenotype//0006544 // glycine metabolic process // inferred from mutant phenotype//0006563 // L-seri                            |
| <b>1.49 Mall</b>            | mal, T cell differentiation protein-like                           |                                                                                                                                                                                                |
| <b>1.49 Myom3</b>           | myomesin family, member 3                                          |                                                                                                                                                                                                |
| <b>1.49 Des</b>             | desmin                                                             | 0007517 // muscle organ development // traceable author statement                                                                                                                              |
| <b>1.48 Art1</b>            | ADP-ribosyltransferase 1                                           | 0006471 // protein ADP-ribosylation // inferred from direct assay                                                                                                                              |
| <b>1.47 Calcr</b>           | calcitonin receptor                                                | 0007165 // signal transduction // inferred from electronic annotation//0007166 // cell surface receptor signaling pathway // inferred from electronic annotation//0007181                      |
| <b>1.47 Cadm4</b>           | cell adhesion molecule 4                                           | 0007155 // cell adhesion // inferred from electronic annotation//0007156 // homophilic cell adhesion via plasma membrane adhesion molecules // --//0007157 // hetero                           |
| <b>1.46 Dnph1</b>           | 2'-deoxy nucleoside 5'-phosphate N-hydrolase 1                     | 0008152 // metabolic process // inferred from electronic annotation//0009116 // nucleoside metabolic process // inferred from electronic annotation//0009117 // nucleo                         |
| <b>1.45 Dmrt2</b>           | doublesex and mab-3 related transcription factor like fam          | 0002052 // positive regulation of neuroblast proliferation // inferred from mutant phenotype//0006355 // regulation of transcription, DNA-templated // inferred from elec                      |
| <b>1.44 Olr1</b>            | oxidized low density lipoprotein (lectin-like) receptor 1          | 0002376 // immune system process // inferred from electronic annotation//0006898 // receptor-mediated endocytosis // inferred from direct assay//0006954 // inflam                             |
| <b>1.44 Slc30a2</b>         | solute carrier family 30 (zinc transporter), member 2              | 0006810 // transport // inferred from electronic annotation//0006811 // ion transport // inferred from electronic annotation//0006812 // cation transport // inferred from                     |
| <b>1.44 Tgm3</b>            | transglutaminase 3, E polypeptide                                  | 0008544 // epidermis development // traceable author statement//0018149 // peptide cross-linking // not recorded//0018149 // peptide cross-linking // traceable author                         |
| <b>1.44 Trim54</b>          | tripartite motif-containing 54                                     | 0007026 // negative regulation of microtubule depolymerization // inferred from direct assay//0007275 // multicellular organismal development // inferred from electroni                       |
| <b>1.43 Gpr87</b>           | G-protein-coupled receptor 87                                      | 0007165 // signal transduction // inferred from electronic annotation//0007186 // G-protein coupled receptor signaling pathway // not recorded//0007194 // negative reg                        |
| <b>1.43 Sbn</b>             | suprabasin                                                         |                                                                                                                                                                                                |
| <b>1.43 Scg2</b>            | secretogranin II                                                   | 0000165 // MAPK cascade // not recorded//0000165 // MAPK cascade // inferred from sequence or structural similarity//0001525 // angiogenesis // inferred from direct i                         |
| <b>1.42 Osr1</b>            | odd-skipped related 1 (Drosophila)                                 | 0000122 // negative regulation of transcription from RNA polymerase II promoter // inferred from genetic interaction//0001655 // urogenital system development // inferi                       |
| <b>1.42 Six1</b>            | sine oculis-related homeobox 1                                     | 0000122 // negative regulation of transcription from RNA polymerase II promoter // inferred from direct assay//0001657 // uterine bud development // inferred from gen                         |
| <b>1.41 Entpd2</b>          | ectonucleoside triphosphate diphosphohydrolase 2                   | 0007186 // G-protein coupled receptor signaling pathway // inferred from direct assay//0009181 // purine ribonucleoside diphosphate catabolic process // inferred from d                       |
| <b>1.41 Tmem121</b>         | transmembrane protein 121                                          |                                                                                                                                                                                                |
| <b>1.41 Gm41224</b>         | predicted gene, 41224                                              |                                                                                                                                                                                                |
| <b>1.40 Atp6v0e2</b>        | ATPase, H <sup>+</sup> transporting, lysosomal VO subunit E2       | 0006810 // transport // inferred from electronic annotation//0006811 // ion transport // inferred from electronic annotation//0008152 // metabolic process // inferred fr                      |
| <b>1.40 Pkrag3</b>          | protein kinase, AMP-activated, gamma 3 non-catalytic su            | 0005978 // glycogen biosynthetic process // inferred from mutant phenotype//0006468 // protein phosphorylation // not recorded//0006629 // lipid metabolic process //                          |
| <b>1.40 Bin1</b>            | bridging integrator 1                                              | 0006897 // endocytosis // inferred from electronic annotation//0007275 // multicellular organismal development // inferred from electronic annotation//00030100 // regu                        |
| <b>1.39 Igcc4</b>           | immunoglobulin superfamily, DCC subclass, member 4                 |                                                                                                                                                                                                |
| <b>1.38 Psoap</b>           | prosaposin                                                         | 0006629 // lipid metabolic process // inferred from electronic annotation//0006665 // sphingolipid metabolic process // inferred from electronic annotation//0006687 // i                      |
| <b>1.37 Flnc</b>            | filamin C, gamma                                                   | 0030029 // actin filament-based process // traceable author statement//0048747 // muscle fiber development // inferred from direct assay                                                       |
| <b>1.36 Cenpb</b>           | centromere protein B                                               | 0006355 // regulation of transcription, DNA-templated // inferred from electronic annotation                                                                                                   |
| <b>1.35 D16Ert6e</b>        | DNA segment, Chr 16, ERATO Doi 6, expressed                        |                                                                                                                                                                                                |
| <b>1.35 Csnk2a1//Gm1003</b> | casein kinase 2, alpha 1 polypeptide//predicted pseudog            | 0006351 // transcription, DNA-templated // inferred from electronic annotation//0006355 // regulation of transcription, DNA-templated // inferred from electronic annota                       |
| <b>1.35 Thsd4</b>           | thrombospondin, type 1, domain containing 4                        | 0006508 // proteolysis // inferred from electronic annotation//0008152 // metabolic process // inferred from electronic annotation//0048251 // elastic fiber assembly // i                     |
| <b>1.34 Gjb2</b>            | gap junction protein, beta 2                                       | 0007154 // cell communication // inferred from electronic annotation//0007267 // cell-cell signaling // inferred from direct assay//0007565 // female pregnancy // inferre                     |
| <b>1.34 Tub</b>             | tubby candidate gene                                               | 0006909 // phagocytosis // inferred from electronic annotation//0006910 // phagocytosis, recognition // inferred from direct assay//0006910 // phagocytosis, recognition                       |
| <b>1.34 Hmgn3</b>           | high mobility group nucleosomal binding domain 3                   | 0006357 // regulation of transcription from RNA polymerase II promoter // inferred from mutant phenotype//0016568 // chromatin modification // inferred from electroni                         |
| <b>1.34 Dysf</b>            | dysferlin                                                          | 0001778 // plasma membrane repair // inferred from direct assay//0001778 // plasma membrane repair // inferred from mutant phenotype//0006906 // vesicle fusion //                             |
| <b>1.34 Cds1</b>            | CD5 antigen-like 1                                                 | 0006898 // receptor-mediated endocytosis // inferred from electronic annotation//0006915 // apoptotic process // inferred from electronic annotation                                           |
| <b>1.33 Reep2</b>           | receptor accessory protein 2                                       | 0002230 // positive regulation of defense response to virus by host // not recorded//0032386 // regulation of intracellular transport // inferred from direct assay//003259                    |
| <b>1.33 Ftsj3</b>           | FtsI homolog 3 (E. coli)                                           | 0000453 // enzyme-directed rRNA 2'-O-methylation // inferred from electronic annotation//0000463 // maturation of LSU-rRNA from tricistronic rRNA transcript (SSU-rRN                          |
| <b>1.32 Gpr85</b>           | G-protein-coupled receptor 85                                      | 0007165 // signal transduction // inferred from electronic annotation//0007186 // G-protein coupled receptor signaling pathway // inferred from electronic annotation//0                       |

| Gene Symbol                   | Gene Title                                                    | Gene Ontology Biological Process                                                                                                                                                                                    |
|-------------------------------|---------------------------------------------------------------|---------------------------------------------------------------------------------------------------------------------------------------------------------------------------------------------------------------------|
| <b>1.32 Hmgcs2</b>            | 3-hydroxy-3-methylglutaryl-Coenzyme A synthase 2              | 0001822 // kidney development // inferred from electronic annotation//0001889 // liver development // inferred from electronic annotation//0006629 // lipid metabolic p                                             |
| <b>1.32 Sypl2</b>             | synaptophysin-like 2                                          | 0006810 // transport // inferred from electronic annotation//0006874 // cellular calcium ion homeostasis // inferred from mutant phenotype//0021762 // substantia nigra                                             |
| <b>1.31 Myh2</b>              | myosin, heavy polypeptide 2, skeletal muscle, adult           | 0001778 // plasma membrane repair // inferred from mutant phenotype//0006936 // muscle contraction // not recorded//0008152 // metabolic process // inferred from                                                   |
| <b>1.31 Jsrp1</b>             | junctional sarcoplasmic reticulum protein 1                   | 0003009 // skeletal muscle contraction // not recorded//0006941 // striated muscle contraction // inferred from sequence or structural similarity//00060314 // regulation c                                         |
| <b>1.30 Aas</b>               | achalasia, adrenocortical insufficiency, alacrimia            | 0006810 // transport // inferred from electronic annotation//0006913 // nucleocytoplasmic transport // not recorded//0007612 // learning // inferred from mutant phen                                               |
| <b>1.30 Hoxd9</b>             | homeobox D9                                                   | 0000122 // negative regulation of transcription from RNA polymerase II promoter // not recorded//0006351 // transcription, DNA-templated // inferred from electronic an                                             |
| <b>1.30 Mmp3</b>              | matrix metalloproteinase 3                                    | 0006508 // proteolysis // inferred from mutant phenotype//0006508 // proteolysis // not recorded//0010727 // negative regulation of hydrogen peroxide metabolic proc                                                |
| <b>1.29 Wnt4</b>              | wingless-type MMTV integration site family, member 4          | 0001656 // metanephros development // inferred from mutant phenotype//0001656 // metanephros development // traceable author statement//0001656 // branching                                                        |
| <b>1.28 Adh7</b>              | alcohol dehydrogenase 7 (class IV), mu or sigma polypept      | 0001523 // retinoid metabolic process // not recorded//0006067 // ethanol metabolic process // not recorded//0006068 // ethanol catabolic process // inferred from mut                                              |
| <b>1.28 Bcl11b</b>            | B cell leukemia/lymphoma 11B                                  | 0003334 // keratinocyte development // inferred from mutant phenotype//0003382 // epithelial cell morphogenesis // inferred from mutant phenotype//0006351 // tran                                                  |
| <b>1.27 Mlec</b>              | malectin                                                      | 0002250 // adaptive immune response // inferred from electronic annotation//0002376 // immune system process // inferred from electronic annotation//0005975 // car                                                 |
| <b>1.26 AU014973</b>          | expressed sequence AU014973                                   |                                                                                                                                                                                                                     |
| <b>1.25 Sult2b1</b>           | sulfotransferase family, cytosolic, 2B, member 1              | 0000103 // sulfate assimilation // inferred from direct assay//0006629 // lipid metabolic process // inferred from electronic annotation//0008202 // steroid metabolic pro                                          |
| <b>1.24 Gpc1</b>              | glypican 1                                                    | 0014037 // Schwann cell differentiation // not recorded//0030200 // heparan sulfate proteoglycan catabolic process // not recorded//0032288 // myelin assembly // not r                                             |
| <b>1.24 A930009E05Rik</b>     | RIKEN cDNA A930009E05 gene//transmembrane protein 1788        |                                                                                                                                                                                                                     |
| <b>1.23 Cyp13</b>             | cytochrome perinuclear theca 3                                |                                                                                                                                                                                                                     |
| <b>1.22 Slc7a3</b>            | solute carrier family 7 (cationic amino acid transporter, y+) | 0003333 // amino acid transmembrane transport // inferred from electronic annotation//0006810 // transport // inferred from electronic annotation//0006865 // amino a                                               |
| <b>1.20 Pascin3</b>           | protein kinase C and casein kinase substrate in neurons 3     | 0006897 // endocytosis // inferred from electronic annotation//0007010 // cytoskeleton organization // not recorded//0016310 // phosphorylation // inferred from electr                                             |
| <b>-1.19 A630052C17Rik</b>    | RIKEN cDNA A630052C17 gene                                    |                                                                                                                                                                                                                     |
| <b>-1.19 Kpna7</b>            | karyopherin alpha 7 (importin alpha 8)                        | 0006606 // protein import into nucleus // inferred from electronic annotation//0006607 // NLS-bearing protein import into nucleus // not recorded//0006810 // transport                                             |
| <b>-1.20 Cxos</b>             | cone-rod homeobox, opposite strand                            |                                                                                                                                                                                                                     |
| <b>-1.20 Nmur1</b>            | neuromedin U receptor 1                                       | 0006816 // calcium ion transport // not recorded//0006821 // chloride transport // not recorded//0006939 // smooth muscle contraction // inferred from electronic anno                                              |
| <b>-1.21 Pyroxd2</b>          | pyridine nucleotide-disulphide oxidoreductase domain 2        | 0055114 // oxidation-reduction process // inferred from electronic annotation                                                                                                                                       |
| <b>-1.21 Dgkq</b>             | diacylglycerol kinase, theta                                  | 0006357 // regulation of transcription from RNA polymerase II promoter // not recorded//0007165 // signal transduction // inferred from electronic annotation//0007186                                              |
| <b>-1.21 Trim43a</b>          | tripartite motif-containing 43A                               |                                                                                                                                                                                                                     |
| <b>-1.21 Pebp4</b>            | phosphatidylethanolamine binding protein 4                    |                                                                                                                                                                                                                     |
| <b>-1.21 Cyb5r2</b>           | cytochrome b5 reductase 2                                     | 0006629 // lipid metabolic process // inferred from electronic annotation//0006694 // steroid biosynthetic process // inferred from electronic annotation//0008202 // ste                                           |
| <b>-1.21 Cd83</b>             | CD83 antigen                                                  | 0006952 // defense response // not recorded//0006959 // humoral immune response // not recorded//0007165 // signal transduction // not recorded//0014070 // resp                                                    |
| <b>-1.22 Atp8b3</b>           | ATPase, class I, type 8B, member 3                            | 0006810 // transport // inferred from electronic annotation//0006869 // lipid transport // inferred from electronic annotation//0007030 // Golgi organization // not recor                                          |
| <b>-1.22 Dram2</b>            | DNA damage regulated autophagy modulator 2                    | 0006915 // apoptotic process // inferred from electronic annotation//0007601 // visual perception // inferred from sequence or structural similarity//0010506 // regulatic                                          |
| <b>-1.22 Pou6f1</b>           | POU domain, class 6, transcription factor 1                   | 0006351 // transcription, DNA-templated // inferred from electronic annotation//0006355 // regulation of transcription, DNA-templated // inferred from electronic annota                                            |
| <b>-1.22 Cep112</b>           | centrosomal protein 112                                       | 0097120 // receptor localization to synapse // not recorded                                                                                                                                                         |
| <b>-1.23 Lckr1</b>            | leucine, glutamate and lysine rich 1                          |                                                                                                                                                                                                                     |
| <b>-1.23 4933402C06Rik</b>    | RIKEN cDNA 4933402C06 gene                                    |                                                                                                                                                                                                                     |
| <b>-1.23 Dcc</b>              | deleted in colorectal carcinoma                               | 0001764 // neuron migration // inferred from mutant phenotype//0006915 // apoptotic process // inferred from electronic annotation//0007275 // multicellular organis                                                |
| <b>-1.23 H2-Eb2</b>           | histocompatibility 2, class II antigen E beta2                | 0002376 // immune system process // inferred from electronic annotation//0002504 // antigen processing and presentation of peptide or polysaccharide antigen via MHC                                                |
| <b>-1.23 Kcnj14</b>           | potassium inwardly-rectifying channel, subfamily J, mem       | 0006810 // transport // inferred from electronic annotation//0006811 // ion transport // inferred from electronic annotation//0006813 // potassium ion transport // infer                                           |
| <b>-1.24 Impg1</b>            | interphotoreceptor matrix proteoglycan 1                      |                                                                                                                                                                                                                     |
| <b>-1.24 Cadps2</b>           | Ca2+ dependent activator protein for secretion 2              | 0006810 // transport // inferred from electronic annotation//0006887 // exocytosis // inferred from electronic annotation//0009267 // cellular response to starvation // ir                                         |
| <b>-1.24 Clp1</b>             | CLP1, cleavage and polyadenylation factor I subunit           | 0006378 // mRNA polyadenylation // not recorded//0006379 // mRNA cleavage // not recorded//0006388 // tRNA splicing, via endonuclease cleavage and ligation // no                                                   |
| <b>-1.24 Ces2c//Ces2d-ps</b>  | carboxylesterase 2C//carboxylesterase 2D, pseudogene          | 0001101 // response to acid chemical // inferred from direct assay//0008152 // metabolic process // inferred from electronic annotation                                                                             |
| <b>-1.24 Zfp125</b>           | zinc finger protein 125                                       |                                                                                                                                                                                                                     |
| <b>-1.25 LOC102638850/R</b>   | 40S ribosomal protein S21, pseudogene//ribosomal prote        | 0000447 // endonucleolytic cleavage in ITS1 to separate SSU-rRNA and LSU-rRNA and LSU-rRNA from tritranscript (SSU-rRNA, 5.8S rRNA, LSU-rRNA) // not r                                                              |
| <b>-1.25 Oas1b</b>            | 2'-5' oligoadenylate synthetase 1B                            | 0002376 // immune system process // inferred from electronic annotation//0006955 // immune response // inferred from electronic annotation//0008152 // metabolic p                                                  |
| <b>-1.25 Krt222</b>           | keratin 222                                                   |                                                                                                                                                                                                                     |
| <b>-1.26 Exd2</b>             | exonuclease 3'-5' domain containing 2                         | 0006139 // nucleobase-containing compound metabolic process // inferred from electronic annotation//0090305 // nucleic acid phosphodiester bond hydrolysis // inferre                                               |
| <b>-1.26 Haoo</b>             | 3-hydroxyanthranilate 3,4-dioxygenase                         | 0006569 // tryptophan catabolic process // inferred from electronic annotation//0009435 // NAD biosynthetic process // inferred from electronic annotation//0010043 //                                              |
| <b>-1.26 a</b>                | nonagouti                                                     | 0006091 // generation of precursor metabolites and energy // inferred from genetic interaction//0008343 // adult feeding behavior // inferred from genetic interaction//                                            |
| <b>-1.26 Gm30054</b>          | predicted gene, 30054                                         |                                                                                                                                                                                                                     |
| <b>-1.26 Kik7</b>             | kallikrein related-peptidase 7 (chymotryptic, stratum corr    | 0002803 // positive regulation of antibacterial peptide production // not recorded//0006508 // proteolysis // inferred from electronic annotation                                                                   |
| <b>-1.26 Fam208a</b>          | family with sequence similarity 208, member A                 | 0006351 // transcription, DNA-templated // inferred from electronic annotation//0006355 // regulation of transcription, DNA-templated // inferred from electronic annota                                            |
| <b>-1.26 Kcnq1</b>            | potassium voltage-gated channel, subfamily Q, member          | 10002230 // positive regulation of defense response to virus by host // not recorded//0006349 // regulation of gene expression by genetic imprinting // inferred from muta                                          |
| <b>-1.27 Trh</b>              | thyrotropin releasing hormone                                 | 0001666 // response to hypoxia // inferred from electronic annotation//0001692 // histamine metabolic process // not recorded//0007628 // adult walking behavior // inf                                             |
| <b>-1.27 Bcar3</b>            | breast cancer anti-estrogen resistance 3                      | 0002089 // lens morphogenesis in camera-type eye // inferred from mutant phenotype//0007165 // signal transduction // inferred from electronic annotation//0007264 //                                               |
| <b>-1.27 Klr1b1f</b>          | killer cell lectin-like receptor subfamily B member 1F        |                                                                                                                                                                                                                     |
| <b>-1.27 Gm9873</b>           | predicted gene 9873                                           |                                                                                                                                                                                                                     |
| <b>-1.28 Adams3</b>           | a disintegrin-like and metalloproteinase (repolysin type)     | v0006508 // proteolysis // inferred from electronic annotation//0007229 // integrin-mediated signaling pathway // inferred from electronic annotation//0010573 // vasculi                                           |
| <b>-1.28 Lrif1</b>            | ligand dependent nuclear receptor interacting factor 1        | 0006351 // transcription, DNA-templated // inferred from electronic annotation//0006355 // regulation of transcription, DNA-templated // inferred from electronic annota                                            |
| <b>-1.29 Stra8</b>            | stimulated by retinoic acid gene 8                            | 0001541 // ovarian follicle development // inferred from mutant phenotype//0006260 // DNA replication // inferred from electronic annotation//0007066 // female meio                                                |
| <b>-1.29 Gm4951</b>           | predicted gene 4951                                           | 0035458 // cellular response to interferon-beta // inferred from direct assay                                                                                                                                       |
| <b>-1.30 Ptk3cd</b>           | phosphatidylinositol 3-kinase catalytic delta polypeptide     | 0001782 // B cell homeostasis // inferred from mutant phenotype//0002250 // adaptive immune response // not recorded//0002376 // immune system process // inferre                                                   |
| <b>-1.31 Gimp4a</b>           | GTPase, IMAP family member 4                                  |                                                                                                                                                                                                                     |
| <b>-1.31 Ear-ps2//Ear1//E</b> | eosinophil-associated, ribonuclease A family, pseudogene      | 0006935 // chemotaxis // inferred from direct assay//0008152 // metabolic process // inferred from electronic annotation//0090305 // nucleic acid phosphodiester bond                                               |
| <b>-1.31 Efnb3</b>            | efrin B3                                                      | 0007275 // multicellular organismal development // inferred from electronic annotation//0007399 // nervous system development // inferred from electronic annotation//                                              |
| <b>-1.31 Gna14</b>            | guanine nucleotide binding protein, alpha 14                  | 0007165 // signal transduction // inferred from electronic annotation//0007186 // G-protein coupled receptor signaling pathway // not recorded//0007188 // adenylate c                                              |
| <b>-1.31 Dusp2</b>            | dual specificity phosphatase 2                                | 0000188 // inactivation of MAPK activity // inferred from electronic annotation//0001706 // endoderm formation // not recorded//0006470 // protein dephosphorylation                                                |
| <b>-1.31 Ear-ps2//Ear1//E</b> | eosinophil-associated, ribonuclease A family, pseudogene      | 0006935 // chemotaxis // inferred from direct assay//0008152 // metabolic process // inferred from electronic annotation//0090305 // nucleic acid phosphodiester bond                                               |
| <b>-1.31 Gm11783</b>          | predicted gene 11783                                          |                                                                                                                                                                                                                     |
| <b>-1.32 Irs3</b>             | insulin receptor substrate 3                                  | 0008286 // insulin receptor signaling pathway // not recorded//0019216 // regulation of lipid metabolic process // not recorded                                                                                     |
| <b>-1.32 Clk1</b>             | CDC-like kinase 1                                             | 0006468 // protein phosphorylation // inferred from electronic annotation//0016310 // phosphorylation // inferred from electronic annotation//0018105 // peptidyl-serin                                             |
| <b>-1.32 Ptprr</b>            | protein tyrosine phosphatase, receptor type, R                | 0001701 // in utero embryonic development // inferred from sequence or structural similarity//0001701 // in utero embryonic development // inferred from electronic an                                              |
| <b>-1.32 Gm21847//Gm386</b>   | predicted gene, 21847//predicted gene, 38698//spermatogone    | 0000442 // inactivation of GTPase activity // inferred from electronic annotation//0001934 // positive regulation of protein phosphorylation // not recorded//0002082 // regulation of oxidative phosphorylation // |
| <b>-1.32 Pink1</b>            | PTEN induced putative kinase 1                                |                                                                                                                                                                                                                     |
| <b>-1.32 D3Ert162e</b>        | DNA segment, Chr 3, ERATO D0162, expressed                    |                                                                                                                                                                                                                     |
| <b>-1.32 Cubn</b>             | cubilin (intrinsic factor-cobalamin receptor)                 | 0001701 // in utero embryonic development // not recorded//0006629 // lipid metabolic process // inferred from electronic annotation//0006810 // transport // inferred                                              |
| <b>-1.33 Gm10804</b>          | predicted gene 10804                                          |                                                                                                                                                                                                                     |
| <b>-1.33 Yes1</b>             | Yamaguchi sarcoma viral (y-yes) oncogene homolog 1            | 0006468 // protein phosphorylation // inferred from electronic annotation//0007169 // transmembrane receptor protein tyrosine kinase signaling pathway // not recorded                                              |
| <b>-1.33 Trpa1</b>            | transient receptor potential cation channel, subfamily A,     | 0006810 // transport // inferred from electronic annotation//0006811 // ion transport // inferred from electronic annotation//0006816 // calcium ion transport // inferred                                          |
| <b>-1.34 Adamdec1</b>         | ADAM-like, decysin 1                                          | 0006508 // proteolysis // inferred from electronic annotation                                                                                                                                                       |

| Gsr-KO, Air[raw] | Gsr-KO, O2[raw] | RefSeq       | Transcript ID | p        | FC (Air: O2 at PND5) | Gene Symbol          | Gene Title                                                   | Gene Ontology Biological Process                                                                                                                                            |
|------------------|-----------------|--------------|---------------|----------|----------------------|----------------------|--------------------------------------------------------------|-----------------------------------------------------------------------------------------------------------------------------------------------------------------------------|
| 1114.1965        | 838.9059        | NM_007894    | //NM_001      | 0.005128 | -1.34                | <b>Ear1</b>          | eosinophil-associated, ribonuclease A family, member 1       | 0008152 // metabolic process // inferred from electronic annotation//0090305 // nucleic acid phosphodiester bond hydrolysis // ---//0090305 // nucleic acid phosphodies     |
| 677.8456         | 511.4963        | NM_009811    |               | 0.009966 | -1.34                | <b>Casp6</b>         | caspase 6                                                    | 0002525 // acute inflammatory response to non-antigenic stimulus // not recorded//0006508 // proteolysis // not recorded//0006508 // proteolysis // inferred from revie     |
| 1353.5447        | 1016.87146      | NM_010423    | //XM_006      | 0.003032 | -1.34                | <b>Hey1</b>          | hairly/enhancer-of-split related with YRPW motif 1           | 0000122 // negative regulation of transcription from RNA polymerase II promoter // inferred from direct assay//0000122 // negative regulation of transcription from RNA     |
| 196.79095        | 149.0175        | XR_406477    | //XR_87825    | 0.004869 | -1.35                | <b>Gm38561</b>       | predicted gene, 38561                                        |                                                                                                                                                                             |
| 55.505066        | 40.343925       | NR_040646    |               | 9.58E-04 | -1.35                | <b>A330049N07Rik</b> | RIKEN cDNA A330049N07 gene                                   |                                                                                                                                                                             |
| 101.593994       | 75.07389        | NM_001025564 | //NR_         | 9.19E-04 | -1.36                | <b>Gm15698</b>       | transcription elongation factor B (SIII), polypeptide 2 pseu | 0006368 // transcription elongation from RNA polymerase II promoter // not recorded                                                                                         |
| 208.89912        | 156.01512       | NM_148935    | //XM_006      | 0.003946 | -1.36                | <b>Foxn4</b>         | forkhead box N4                                              | 0001947 // heart looping // inferred from sequence or structural similarity//0006351 // transcription, DNA-templated // inferred from electronic annotation//0006355 // r   |
| 112.4806         | 83.24882        | NR_045298    |               | 0.005816 | -1.36                | <b>2900009J06Rik</b> | RIKEN cDNA 2900009J06 gene                                   |                                                                                                                                                                             |
| 289.98132        | 215.11813       | NM_001164563 | //NM_         | 0.007088 | -1.37                | <b>Amigo2</b>        | adhesion molecule with Ig like domain 2                      | 0007155 // cell adhesion // not recorded//0007156 // homophilic cell adhesion via plasma membrane adhesion molecules // not recorded//0007156 // homophilic cell ad         |
| 30.81708         | 21.533033       |              |               | 0.004368 | -1.37                | <b>C79240</b>        | expressed sequence C79240                                    |                                                                                                                                                                             |
| 2047.1757        | 1500.6091       | NM_001012766 | //NM_         | 0.007611 | -1.38                | <b>Ear-ps2</b>       | eosinophil-associated, ribonuclease A family, pseudogene     | 0006935 // chemotaxis // inferred from direct assay//0008152 // metabolic process // inferred from electronic annotation//0090305 // nucleic acid phosphodiester bond       |
| 98.24313         | 70.459274       | NM_001301353 | //NM_         | 0.00669  | -1.39                | <b>Apod</b>          | apolipoprotein D                                             | 0000302 // response to reactive oxygen species // inferred from mutant phenotype//0000302 // response to reactive oxygen species // not recorded//0006006 // glucose        |
| 244.69336        | 175.83081       | NM_001146328 | //NM_         | 0.003411 | -1.41                | <b>Rbm46</b>         | RNA binding motif protein 46                                 |                                                                                                                                                                             |
| 60.79609         | 42.06468        | NM_001080809 | //XM_         | 0.002325 | -1.42                | <b>Cps1</b>          | carbamoyl-phosphate synthetase 1                             | 0000050 // urea cycle // not recorded//0000050 // urea cycle // inferred by curator//0001889 // liver development // inferred from electronic annotation//0005980 // gh     |
| 864.3497         | 613.0662        | NM_153170    | //XM_006      | 0.002885 | -1.43                | <b>Slc36a2</b>       | solute carrier family 36 (proton/amino acid symporter), n    | 0010155 // regulation of proton transport // not recorded//0015808 // L-alanine transport // inferred from direct assay//0015816 // glycine transport // inferred from dire |
| 207.42911        | 146.9297        | NM_001045516 | //XM_         | 0.007125 | -1.43                | <b>Proca1</b>        | protein interacting with cyclin A1                           |                                                                                                                                                                             |
| 92.5706          | 63.493557       | XR_882338    | //XR_88233    | 0.004557 | -1.45                | <b>Gm28840</b>       | predicted gene 28840                                         | //oppositely-transcribed, rearranged locus on the Y                                                                                                                         |
| 120.14404        | 83.24557        | NM_177814    | //XM_006      | 0.009396 | -1.46                | <b>Erc2</b>          | ELKS/RAB6-interacting/CAST family member 2                   |                                                                                                                                                                             |
| 1060.3413        | 713.14526       | NR_002896    | //NR_0044     | 0.008032 | -1.50                | <b>Snhg1</b>         | small nucleolar RNA host gene 1                              | //small nucleolar RNA, C/D box 22                                                                                                                                           |
| 120.54032        | 78.887665       | NM_010643    | //XM_006      | 0.006882 | -1.53                | <b>Klk1b24</b>       | kallikrein 1-related peptidase b24                           | 0002526 // acute inflammatory response // ---//0003073 // regulation of systemic arterial blood pressure // ---//0006508 // proteolysis // non-traceable author statement   |
| 70.1823          | 44.966255       | NM_001130419 | //NM_         | 0.001959 | -1.53                | <b>Hpca</b>          | hippocalcin                                                  | 0007420 // brain development // inferred from electronic annotation//0010518 // positive regulation of phospholipase activity // not recorded//0014070 // response to o     |
| 125.827644       | 76.53345        | NM_001305549 | //NM_         | 0.009845 | -1.64                | <b>Apoa2</b>         | apolipoprotein A-II                                          | 0002526 // acute inflammatory response // inferred from electronic annotation//0002740 // negative regulation of cytokine secretion involved in immune response // not      |
| 529.0853         | 291.58115       | NM_001316729 | //NM_         | 0.008948 | -1.83                | <b>Qpct</b>          | glutaminyl-peptide cyclotransferase (glutaminyl cyclase)     | 0017186 // peptidyl-pyroglytamic acid biosynthetic process, using glutaminyl-peptide cyclotransferase // not recorded                                                       |
| 147.48763        | 80.17735        | NM_054063    |               | 4.28E-04 | -1.86                | <b>Psg28</b>         | pregnancy-specific glycoprotein 28                           | 0007565 // female pregnancy // inferred from electronic annotation                                                                                                          |
| 68.43109         | 27.991377       | XR_391854    | //XR_39192    | 3.56E-04 | -2.37                | <b>Astx</b>          | amplified spermatogenic transcripts X encoded 6              | //predicted gene 28133//predicted gene 28220//predicted gene 28260//predicted gene 28365//predicted gene 28606//predi                                                       |
| 374.6742         | 144.01358       | NM_001164047 | //NM_         | 0.008354 | -2.61                | <b>Mb</b>            | myoglobin                                                    | 0001666 // response to hypoxia // inferred from mutant phenotype//0006810 // transport // inferred from electronic annotation//0007507 // heart development // inferr       |
| 121.2285         | 220.95337       | NM_010859    |               | 0.00206  | -2.82                | <b>Myl3</b>          | myosin, light polypeptide 3                                  | 0002026 // regulation of the force of heart contraction // not recorded//0006942 // regulation of striated muscle contraction // not recorded//0007519 // skeletal muscle   |
| 1358.016         | 126.57135       | NM_010861    | //XM_006      | 0.004603 | -10.65               | <b>Myl2</b>          | myosin, light polypeptide 2, regulatory, cardiac, slow       | 0002026 // regulation of the force of heart contraction // not recorded//0003007 // heart morphogenesis // inferred from genetic interaction//0007507 // heart developn     |
| 2265.6091        | 118.197014      | NM_008725    |               | 0.002362 | -19.06               | <b>Nppa</b>          | natriuretic peptide type A                                   | 0001666 // response to hypoxia // inferred from electronic annotation//0003085 // negative regulation of systemic arterial blood pressure // not recorded//0006182 // cc    |
