# Supplementary material for: Glutathione reductase deficiency alters lung development and hyperoxic responses in neonatal mice
Source: PubMed Central journal article supplement — Redox Biol. 2020 Nov 13;38:101797. doi: 10.1016/j.redox.2020.101797 (PMC7708869; doi:10.1016/j.redox.2020.101797), 2020-11-13
Supplement: mmc7.pdf [file mmc7.pdf]

Table S7. Lung genes (n=403) significantly changed at 56 days post-hyperoxia (O2) in wild-type (Gsr-WT) mice (moderated t-test, p < 0.01).

Blue(-): fold lower in neonate-O2. Red(+): fold higher in neonate-O2.

| [C3H/HeN_Air][raw] | [C3H/HeN_O2][raw] | p            | RefSeq Tra FC (neonate-Air vs neonate-O2 at PND56) | Gene Symbol                   | Gene Title                                                                            | Gene Ontology Biological Process                                                                                      |
|--------------------|-------------------|--------------|----------------------------------------------------|-------------------------------|---------------------------------------------------------------------------------------|-----------------------------------------------------------------------------------------------------------------------|
| 160.45352          | 1108.9347         | 8.56E-04     | NM_00914 6.91                                      | <i>Cxcl5</i>                  | chemokine (C-X-C motif) ligand 5                                                      | 0001776 // leukocyte homeostasis // inferred from mutant phenotype//0001816 // cytokine production // not rec         |
| 15.179602          | 79.0113           | 5.98E-04     | NM_20332 5.21                                      | <i>Cxcl3</i>                  | chemokine (C-X-C motif) ligand 3                                                      | 0002690 // positive regulation of leukocyte chemotaxis // not recorded//0006935 // chemotaxis // inferred from e      |
| 122.03934          | 491.43213         | 4.83E-04     | NM_01186 4.03                                      | <i>Slc26a4</i>                | solute carrier family 26, member 4                                                    | 0006810 // spermad // inferred from electronic annotation//0006821 // chloride transport // not recorded//000         |
| 14.616371          | 43.786827         | 4.94E-04     | NM_00108 3.00                                      | <i>Xlir3a//Xlir3b//Xlir3c</i> | X-linked lymphocyte-regulated 3A//X-linked lymphocyte-regulated 3B//X-linked lymph    | 0007286 // spermatid development // not recorded//0005196 // positive regulation of synapse assembly // inferre       |
| 47.468723          | 133.17143         | 0.009997213  | NM_00860 2.81                                      | <i>Mmp12</i>                  | matrix metalloproteinase 12                                                           | 0006508 // proteolysis // inferred from electronic annotation//0014070 // response to organic cyclic compound //      |
| 28.481337          | 75.41425          | 1.09E-04     | NM_00914 2.65                                      | <i>Cxcl2</i>                  | chemokine (C-X-C motif) ligand 2                                                      | 0001975 // response to amphetamine // inferred from electronic annotation//0002237 // response to molecule of         |
| 74.89079           | 185.64212         | 0.006322086  | NM_01107 2.48                                      | <i>Phex</i>                   | phosphatase regulating endopeptidase homolog, X-linked                                | 0006508 // proteolysis // not recorded//0019637 // organophosphate metabolic process // inferred from mutant ;        |
| 124.5391           | 285.3428          | 0.00266994   | NM_17729 2.29                                      | <i>Itgb8</i>                  | integrin beta 8                                                                       | 0001573 // ganglioside metabolic process // inferred from mutant phenotype//0007155 // cell adhesion // inferre       |
| 337.2531           | 753.41034         | 8.66E-04     | NM_01131 2.23                                      | <i>Saa3</i>                   | serum amyloid A 3                                                                     | 0006953 // acute-phase response // inferred from electronic annotation//0007252 // I-kappaB phosphorylation //        |
| 165.72777          | 346.01883         | 7.00E-05     | NM_01076 2.09                                      | <i>Marco</i>                  | macrophage receptor with collagenous structure                                        | 0002376 // immune system process // inferred from electronic annotation//0006897 // endocytosis // inferred fr        |
| 623.4232           | 1291.712          | 0.003187251  | NM_00940 2.07                                      | <i>Pglyrp1</i>                | peptidoglycan recognition protein 1                                                   | 0002221 // pattern recognition receptor signaling pathway // not recorded//0002376 // immune system process //        |
| 50.312             | 102.8253          | 0.008796419  | NM_00126 2.04                                      | <i>Slc1a5</i>                 | solute carrier organic anion transporter family, member 1a5                           | 0006810 // transport // inferred from electronic annotation//0006811 // ion transport // inferred from electronic ;   |
| 216.17557          | 426.01157         | 0.001299659  | NM_18324 1.97                                      | <i>Wfdc21</i>                 | WAP four-disulfide core domain 21                                                     | 0010466 // negative regulation of peptidase activity // inferred from electronic annotation//0032496 // response t    |
| 90.62632           | 178.31107         | 0.006205168  | NM_01133 1.97                                      | <i>C117</i>                   | chemokine (C-C motif) ligand 17                                                       | 0002548 // monocyte chemotaxis // ---//0006935 // chemotaxis // traceable author statement//0006954 // inflan         |
| 185.67882          | 361.4865          | 3.54E-04     | NM_00108 1.95                                      | <i>LOC102642186//Wfdc17</i>   | WAP four-disulfide core domain protein 18-like//WAP four-disulfide core domain 17     | 0010466 // negative regulation of peptidase activity // inferred from electronic annotation//0010951 // negative r    |
| 1397.9376          | 2716.0068         | 0.001128585  | NM_00849 1.94                                      | <i>Lcn2</i>                   | lipocalin 2                                                                           | 0002376 // immune system process // inferred from electronic annotation//0006810 // transport // inferred from        |
| 167.47597          | 314.58688         | 0.003592327  | NM_00832 1.88                                      | <i>Ifi202b//LOC100044068</i>  | interferon activated gene 202B//Interferon-activable protein 202-like                 | 0002376 // immune system process // inferred from electronic annotation//0006954 // inflammatory response // i        |
| 73.78068           | 138.49205         | 4.44E-04     | NM_01981 1.88                                      | <i>Slc5a1</i>                 | solute carrier family 5 (sodium/glucose cotransporter), member 1                      | 0001656 // metanephros development // inferred from mutant phenotype//0006810 // transport // inferred from           |
| 53.356308          | 99.03036          | 8.50E-04     | NM_00966 1.86                                      | <i>Alox15</i>                 | arachidonate 15-lipoxygenase                                                          | 0001503 // ossification // inferred from mutant phenotype//0002820 // negative regulation of adaptive immune r        |
| 92.105484          | 169.88239         | 0.002920989  | NM_02966 1.84                                      | <i>Mfsd2a</i>                 | major facilitator superfamily domain containing 2A                                    | 0006810 // transport // inferred from electronic annotation//0006869 // lipid transport // inferred from electronic   |
| 54.371243          | 98.499794         | 4.52E-04     | NM_20137 1.81                                      | <i>Prmt8</i>                  | protein arginine N-methyltransferase 8                                                | 0006355 // regulation of transcription, DNA-templated // not recorded//0006479 // protein methylation // inferre      |
| 273.74545          | 490.9798          | 0.002535304  | NM_05409 1.79                                      | <i>Steap4</i>                 | STEAP family member 4                                                                 | 0006810 // transport // inferred from electronic annotation//0006811 // ion transport // inferred from electronic ;   |
| 121.52661          | 213.07585         | 0.002070303  | NM_00970 1.75                                      | <i>Arg2</i>                   | arginase type II                                                                      | 0000050 // urea cycle // inferred from electronic annotation//0001657 // ureteric bud development // inferred fr      |
| 802.8379           | 1405.1028         | 0.005631897  | NM_00984 1.75                                      | <i>Cd14</i>                   | CD14 antigen                                                                          | 0002237 // response to molecule of bacterial origin // inferred from direct assay//0002376 // immune system proc      |
| 970.7131           | 1692.6278         | 0.001552247  | NM_02979 1.74                                      | <i>Lrg1</i>                   | leucine-rich alpha-2 glycoprotein 1                                                   | 0001938 // positive regulation of endothelial cell proliferation // inferred from mutant phenotype//0030511 // poi    |
| 253.69846          | 429.0834          | 1.32E-04     | NM_00817 1.69                                      | <i>Cxcl1</i>                  | chemokine (C-X-C motif) ligand 1                                                      | 0002237 // response to molecule of bacterial origin // not recorded//0002526 // acute inflammatory response // n      |
| 79.5308            | 133.85153         | 0.008657853  | NM_02683 1.68                                      | <i>Ms4a6d</i>                 | membrane-spanning 4-domains, subfamily A, member 6D                                   |                                                                                                                       |
| 147.74992          | 248.09619         | 0.009389659  | NM_00117 1.68                                      | <i>Sertad4</i>                | SERTA domain containing 4                                                             |                                                                                                                       |
| 228.96149          | 382.4917          | 0.004369808  | NM_00839 1.67                                      | <i>Itgae</i>                  | integrin alpha E, epithelial-associated                                               | 0007155 // cell adhesion // inferred from electronic annotation//0007229 // integrin-mediated signaling pathway ;     |
| 346.2966           | 574.3057          | 0.003533099  | NM_00962 1.66                                      | <i>Adm</i>                    | adrenomedullin                                                                        | 0001570 // vasculogenesis // not recorded//0001666 // response to hypoxia // inferred from electronic annotation      |
| 429.16483          | 707.2988          | 0.007730759  | NM_02789 1.65                                      | <i>Rhpn2</i>                  | Rho GTPase binding protein 2                                                          | 0007165 // signal transduction // inferred from electronic annotation                                                 |
| 88.938065          | 144.16412         | 2.74E-04     | NM_00782 1.62                                      | <i>Cyp7b1</i>                 | cytochrome P450, family 7, subfamily b, polypeptide 1                                 | 0006629 // lipid metabolic process // inferred from electronic annotation//0006699 // bile acid biosynthetic proc     |
| 489.19864          | 791.8601          | 0.003541607  | NM_00939 1.62                                      | <i>Tnfrsf2</i>                | tumor necrosis factor, alpha-induced protein 2                                        | 0001525 // angiogenesis // inferred from electronic annotation//0006887 // exocytosis // not recorded//0007275        |
| 77.8204            | 124.29989         | 0.001246387  | NM_01040 1.60                                      | <i>Hai</i>                    | histidine ammonia lyase                                                               | 0006547 // histidine metabolic process // inferred from electronic annotation//0006548 // histidine catabolic proc    |
| 27.589792          | 44.030464         | 0.005063105  | NM_00108 1.60                                      | <i>Apobec4</i>                | apolipoprotein B mRNA editing enzyme, catalytic polypeptide-like 4 (putative)         | 0006397 // mRNA processing // inferred from electronic annotation                                                     |
| 37.68251           | 59.952892         | 0.004336717  | NM_00910 1.59                                      | <i>Rptn</i>                   | repetin                                                                               |                                                                                                                       |
| 1393.7108          | 2206.045          | 0.006213602  | NM_00128 1.58                                      | <i>Ifi271a</i>                | interferon, alpha-inducible protein 27 like 2A                                        | 0007568 // aging // inferred from direct assay//0009615 // response to virus // inferred from direct assay            |
| 103.747055         | 164.1735          | 7.34E-04     | NM_17889 1.58                                      | <i>Hepacam2</i>               | HEPACAM family member 2                                                               | 0007049 // cell cycle // inferred from electronic annotation//0007067 // mitotic nuclear division // inferred from e  |
| 79.49889           | 125.05292         | 0.00416294   | NM_01188 1.57                                      | <i>Sept3</i>                  | SEPT3                                                                                 | 0007049 // cell cycle // inferred from electronic annotation//0051301 // cell division // inferred from electronic an |
| 29.550974          | 45.499527         | 0.005427833  | NM_00111 1.54                                      | <i>Efcab12</i>                | EF-hand calcium binding domain 12                                                     |                                                                                                                       |
| 43.930847          | 67.59953          | 4.09E-04     | NM_00798 1.54                                      | <i>Fap</i>                    | fibroblast activation protein                                                         | 0001525 // angiogenesis // inferred from electronic annotation//0006508 // proteolysis // not recorded//000691        |
| 204.86887          | 314.52658         | 0.002320256  | NM_00131 1.54                                      | <i>Rgs5</i>                   | regulator of G-protein signaling 5                                                    | 0007165 // signal transduction // not recorded//0007186 // G-protein coupled receptor signaling pathway // trace      |
| 183.69272          | 281.75977         | 0.005423922  | NM_14494 1.53                                      | <i>Cd207</i>                  | CD207 antigen                                                                         | 0051607 // defense response to virus // not recorded                                                                  |
| 82.25848           | 125.55188         | 0.004743074  | NM_00788 1.53                                      | <i>Atn1</i>                   | atrophin 1                                                                            | 0000122 // negative regulation of transcription from RNA polymerase II promoter // inferred from direct assay//0C     |
| 52.794518          | 80.482445         | 0.00771485   | NM_00103 1.52                                      | <i>Cd69</i>                   | CD69 antigen                                                                          | 0035690 // cellular response to drug // inferred from expression pattern                                              |
| 47.343937          | 72.09121          | 0.001875296  | 1.52                                               | <i>D3Wsu106e</i>              | DNA segment, Chr 3, Wayne State University 106, expressed                             |                                                                                                                       |
| 306.2107           | 465.40314         | 0.007771956  | NM_18331 1.52                                      | <i>Cttn1</i>                  | cortactin 1                                                                           |                                                                                                                       |
| 40.14017           | 60.255722         | 0.004502521  | NM_01373 1.50                                      | <i>Plek2</i>                  | pleckstrin 2                                                                          | 0035556 // intracellular signal transduction // inferred from electronic annotation                                   |
| 290.21262          | 434.23376         | 0.001688143  | NM_00977 1.50                                      | <i>C1qb</i>                   | complement component 1, q subcomponent, beta polypeptide                              | 0002376 // immune system process // inferred from electronic annotation//0006958 // complement activation, cl         |
| 185.29271          | 276.324           | 0.008864501  | NM_00812 1.49                                      | <i>Gjb2</i>                   | gap junction protein, beta 2                                                          | 0007154 // cell communication // inferred from electronic annotation//0007267 // cell-cell signaling // inferred fr   |
| 67.0897            | 99.49912          | 0.008166593  | NM_13324 1.48                                      | <i>Ppargc1b</i>               | peroxisome proliferative activated receptor, gamma, coactivator 1 beta                | 0001503 // ossification // inferred from mutant phenotype//0006351 // transcription, DNA-templated // inferred f      |
| 330.95035          | 487.78784         | 0.008430106  | NM_01178 1.47                                      | <i>Adamts5</i>                | a disintegrin-like and metalloproteinase (reprolysin type) with thrombospondin type 1 | 0006508 // proteolysis // inferred from electronic annotation//0042742 // defense response to bacterium // infer      |
| 72.834885          | 106.539406        | 0.00986055   | NM_00111 1.46                                      | <i>Dcl1</i>                   | doublecortin-like kinase 1                                                            | 0001764 // neuron migration // inferred from genetic interaction//0006468 // protein phosphorylation // inferred      |
| 38.884678          | 56.83209          | 0.007502906  | NM_00102 1.46                                      | <i>Cdc6</i>                   | cell division cycle 6                                                                 | 0006260 // DNA replication // inferred from electronic annotation//0006270 // DNA replication initiation // inferre   |
| 91.46453           | 133.1988          | 0.007729532  | NM_01938 1.46                                      | <i>Cd86</i>                   | CD86 antigen                                                                          | 0001878 // response to yeast // inferred from electronic annotation//0002224 // toll-like receptor signaling pathw    |
| 290.891            | 421.7043          | 0.001146297  | NM_02640 1.45                                      | <i>Rab32</i>                  | RAB32, member RAS oncogene family                                                     | 0006886 // intracellular protein transport // not recorded//0007264 // small GTPase mediated signal transduction      |
| 15.133514          | 21.88079          | 0.001247762  | 1.45                                               | <i>A1594671</i>               | expressed sequence A1594671                                                           |                                                                                                                       |
| 33.051933          | 47.434956         | 0.007584661  | NM_00120 1.44                                      | <i>A1607873</i>               | expressed sequence A1607873                                                           |                                                                                                                       |
| 101.96524          | 145.0782          | 0.002542561  | NM_00111 1.42                                      | <i>Zfp385b</i>                | zinc finger protein 385B                                                              | 0000122 // negative regulation of transcription from RNA polymerase II promoter // ---                                |
| 50.433205          | 71.72307          | 0.005982272  | NM_13922 1.42                                      | <i>Rhbd13</i>                 | rhombo1, veinlet-like 3 (Drosophila)                                                  | 0006915 // apoptotic process // inferred from electronic annotation//0072332 // intrinsic apoptotic signaling path    |
| 343.12473          | 487.0162          | 0.001673632  | NM_00131 1.42                                      | <i>Kdm6a</i>                  | lysine (K)-specific demethylase 6A                                                    | 0006508 // proteolysis // inferred from electronic annotation//0016485 // protein processing // not recorded          |
| 14.488875          | 20.423174         | 0.009849513  | NR_077221 1.41                                     | <i>Gm6297</i>                 | predicted gene 6297                                                                   | 0001701 // in utero embryonic development // inferred from mutant phenotype//0001843 // neural tube closure ;         |
| 16.098097          | 22.65619          | 0.005918719  | 1.41                                               | <i>C76798</i>                 | expressed sequence C76798                                                             |                                                                                                                       |
| 36.69145           | 51.520348         | 0.009432683  | NM_00102 1.40                                      | <i>Pla2g4f</i>                | phospholipase A2, group IVF                                                           | 0001516 // prostaglandin biosynthetic process // inferred from direct assay//0006629 // lipid metabolic process //    |
| 32.784462          | 45.97425          | 0.005819492  | NM_00110 1.40                                      | <i>Lin9</i>                   | lin-9 homolog (C. elegans)                                                            | 0006351 // transcription, DNA-templated // inferred from electronic annotation//0007049 // cell cycle // inferred /   |
| 35.842834          | 49.98524          | 0.0066939644 | NM_17862 1.39                                      | <i>Fbxl2</i>                  | F-box and leucine-rich repeat protein 2                                               | 0006511 // ubiquitin-dependent protein catabolic process // inferred from mutant phenotype//0006513 // protein        |
| 70.999565          | 98.24687          | 0.008711631  | NM_00102 1.38                                      | <i>Ms4a7</i>                  | membrane-spanning 4-domains, subfamily A, member 7                                    |                                                                                                                       |
| 130.01857          | 179.53609         | 0.009249731  | NM_01087 1.38                                      | <i>Naip5</i>                  | NLR family, apoptosis inhibitory protein 5                                            | 0002376 // immune system process // inferred from electronic annotation//0006915 // apoptotic process // infern       |
| 398.17203          | 548.8051          | 0.004148808  | NM_00129 1.38                                      | <i>Preb</i>                   | prolactin regulatory element binding                                                  | 0006351 // transcription, DNA-templated // inferred from electronic annotation//0006355 // regulation of transcr      |
| 96.99668           | 133.31953         | 0.005958783  | NM_17726 1.37                                      | <i>Tmem154</i>                | transmembrane protein 154                                                             |                                                                                                                       |
| 153.95074          | 211.4337          | 0.006135753  | NM_02798 1.37                                      | <i>Nox1</i>                   | NADPH oxidase organizer 1                                                             | 0006801 // superoxide metabolic process // inferred from direct assay//0022617 // extracellular matrix disassembl     |
| 38.381245          | 52.666073         | 0.001891153  | NM_02847 1.37                                      | <i>Nwd2</i>                   | NADCH and WD repeat domain containing 2                                               |                                                                                                                       |
| 91.808205          | 125.38302         | 0.008303902  | NM_00128 1.37                                      | <i>Lrmp</i>                   | lymphoid-restricted membrane protein                                                  | 0002376 // immune system process // inferred from electronic annotation//0007338 // single fertilization // infer     |
| 52.735573          | 71.885925         | 0.004436436  | NM_01107 1.36                                      | <i>Abcb1b</i>                 | ATP-binding cassette, sub-family B (MDR/TAP), member 1B                               | 0006810 // transport // not recorded//0006855 // drug transmembrane transport // not recorded//0008152 // m           |
| 80.28159           | 109.415375        | 0.00610617   | NM_01078 1.36                                      | <i>Cma1</i>                   | chymase 1, mast cell                                                                  | 0006508 // proteolysis // not recorded//0006518 // peptide metabolic process // inferred from electronic annotati     |
| 26.7142            | 36.253036         | 0.003406007  | NM_00127 1.36                                      | <i>Adams5</i>                 | a disintegrin and metalloproteinase domain 5                                          | 0006508 // proteolysis // inferred from electronic annotation                                                         |
| 69.31296           | 94.01435          | 0.007565392  | NM_05308 1.36                                      | <i>Tcf23</i>                  | transcription factor 23                                                               | 0007275 // multicellular organismal development // inferred from electronic annotation//0007517 // muscle organ       |
| 207.03404          | 280.40192         | 0.002961725  | NM_00115 1.35                                      | <i>Fgd2</i>                   | FYVE, RhoGEF and PH domain containing 2                                               | 0035023 // regulation of Rho protein signal transduction // inferred from electronic annotation//0043507 // posit     |
| 147.02959          | 198.83836         | 0.008421873  | NM_17386 1.35                                      | <i>Gpt2</i>                   | glutamic pyruvate transaminase (alanine aminotransferase) 2                           | 0006103 // 2-oxoglutarate metabolic process // not recorded//0009058 // biosynthetic process // inferred from elk     |

| [C3H/HeN, Air](raw) | [C3H/HeN, O2](raw) | p           | RefSeq Tra FC (neonate-Air vs neonate-O2 at PND56) | Gene Symbol                          | Gene Title                                                                             | Gene Ontology Biological Process                                                                                                                                                                                            |
|---------------------|--------------------|-------------|----------------------------------------------------|--------------------------------------|----------------------------------------------------------------------------------------|-----------------------------------------------------------------------------------------------------------------------------------------------------------------------------------------------------------------------------|
| 27.880014           | 37.659985          | 0.005276762 | NM_01951.1.35                                      | <b>Astn2</b>                         | astroctactin 2                                                                         | 2000009 // negative regulation of protein localization to cell surface // inferred from direct assay                                                                                                                        |
| 36.756874           | 49.50593           | 0.003642043 | XR_378441.1.35                                     | <b>Sox6os</b>                        | SRY (sex determining region Y)-box 6, opposite strand                                  |                                                                                                                                                                                                                             |
| 58.820873           | 78.94708           | 0.002647361 | NM_13425.1.34                                      | <b>Havcr2</b>                        | hepatitis A virus cellular receptor 2                                                  |                                                                                                                                                                                                                             |
| 23.426474           | 31.409649          | 0.005348173 | NM_00790.1.34                                      | <b>Edn2</b>                          | endothelin 2                                                                           | 0001819 // positive regulation of cytokine production // inferred from mutant phenotype//0002519 // natural killer cell mediated cytotoxicity // inferred from electronic annotation//0001516 // prostaglandin biosynthesis |
| 115.15525           | 153.72656          | 0.008440082 | NM_14722.1.33                                      | <b>Abca9</b>                         | ATP-binding cassette, sub-family A (ABC1), member 9                                    | 0006810 // transport // inferred from electronic annotation//0006869 // lipid transport // not recorded//000815                                                                                                             |
| 573.971             | 766.05975          | 0.006920024 | NM_01577.1.33                                      | <b>Mfap5</b>                         | microfibrillar associated protein 5                                                    | 0043206 // extracellular fibril organization // inferred from direct assay//0006216 // definitive hemopoiesis // infer                                                                                                      |
| 657.6893            | 875.4245           | 0.005582593 | NM_01670.1.33                                      | <b>C6</b>                            | component component 6                                                                  | 0001701 // in utero embryonic development // inferred from genetic interaction//0001970 // positive regulation o                                                                                                            |
| 446.70416           | 594.31305          | 0.006751983 | NM_01026.1.33                                      | <b>Gda</b>                           | guanine deaminase                                                                      | 0006147 // guanine catabolic process // inferred from electronic annotation//0031116 // positive regulation of mi                                                                                                           |
| 792.27637           | 1044.4856          | 0.007959247 | NM_02963.1.32                                      | <b>Plet1</b>                         | placenta expressed transcript 1                                                        | 0001953 // negative regulation of cell-matrix adhesion // inferred from mutant phenotype//0030154 // cell differe                                                                                                           |
| 5116.9478           | 6734.9746          | 0.0079921   | NM_00769.1.32                                      | <b>Chil1</b>                         | chitinase-like 1                                                                       | 0005975 // carbohydrate metabolic process // inferred from electronic annotation//0006032 // chitin catabolic pr                                                                                                            |
| 470.82602           | 618.0451           | 0.007345832 | NM_00116.1.31                                      | <b>Sema04a</b>                       | sema domain, immunoglobulin domain (Ig), transmembrane domain (TM) and short cy        | 0001525 // angiogenesis // inferred from electronic annotation//0001755 // neural crest cell migration // not reco                                                                                                          |
| 28.032845           | 36.780437          | 0.007910694 | NM_01996.1.31                                      | <b>Brip1</b>                         | bone morphogenic protein/retnoic acid inducible neural specific 1                      | 0007049 // cell cycle // inferred from electronic annotation//0007050 // cell cycle arrest // inferred from direct                                                                                                          |
| 733.4679            | 958.2934           | 0.009465014 | NM_00103.1.31                                      | <b>Golm1</b>                         | golgi membrane protein 1                                                               | 0006997 // nucleus organization // inferred from mutant phenotype//0019216 // regulation of lipid metabolic pro                                                                                                             |
| 115.67084           | 150.88017          | 0.007378882 | NM_00129.1.30                                      | <b>Hnf1b</b>                         | HNF1 homeobox B                                                                        | 0000122 // negative regulation of transcription from RNA polymerase II promoter // inferred from direct assay//00                                                                                                           |
| 1666.4786           | 2167.2485          | 0.008717786 | NM_01042.1.30                                      | <b>Hxhb</b>                          | hexosaminidase B                                                                       | 0001501 // skeletal system development // inferred from genetic interaction//0005975 // carbohydrate metabolic                                                                                                              |
| 757.7507            | 983.9726           | 0.004688831 | NM_15352.1.30                                      | <b>Insig1</b>                        | insulin induced gene 1                                                                 | 0006629 // lipid metabolic process // inferred from electronic annotation//0006641 // triglyceride metabolic proce                                                                                                          |
| 71.324974           | 91.484276          | 0.006599128 | NM_00977.1.28                                      | <b>C3ar1</b>                         | complement component 3a receptor 1                                                     | 0002430 // complement receptor mediated signaling pathway // not recorded//0002462 // tolerance induction to                                                                                                                |
| 17.56537            | 22.414295          | 0.009616536 | XR_376519.1.28                                     | <b>4933424M12Rik</b>                 | RIKEN cDNA 4933424M12 gene                                                             |                                                                                                                                                                                                                             |
| 551.6129            | 702.27747          | 0.006189729 | NM_08041.1.27                                      | <b>Igsf8</b>                         | immunoglobulin superfamily, member 8                                                   | 000145 // regulation of cell motility // inferred from genetic interaction                                                                                                                                                  |
| 55.406307           | 70.44439           | 0.004641838 | NM_19902.1.27                                      | <b>Zbtb26</b>                        | zinc finger and BTB domain containing 26                                               | 000122 // negative regulation of transcription from RNA polymerase II promoter // not recorded                                                                                                                              |
| 17.210026           | 21.567137          | 0.009463575 | NM_03060.1.25                                      | <b>Cc1a2//C1ca3a2//C1ca1//C1ca3a</b> | chloride channel accessory 2//chloride channel accessory 3A2//chloride channel acc     | 0006508 // proteolysis // inferred from electronic annotation//0006810 // transport // inferred from electronic an                                                                                                          |
| 51.473385           | 64.1107            | 0.00652821  | NM_17059.1.25                                      | <b>Igsf11</b>                        | immunoglobulin superfamily, member 11                                                  | 0007155 // cell adhesion // inferred from electronic annotation//0004008 // regulation of growth // inferred from                                                                                                           |
| 36.60131            | 45.27813           | 0.009885551 | NM_14598.1.24                                      | <b>Fam83f</b>                        | family with sequence similarity 83, member F                                           |                                                                                                                                                                                                                             |
| 14.085622           | 17.359968          | 0.007001574 | NM_00103.1.23                                      | <b>Elavl4</b>                        | ELAV (embryonic lethal, abnormal vision, Drosophila)-like 4 (Hu antigen D)             | 0007399 // nervous system development // inferred from electronic annotation//0007568 // aging // inferred from                                                                                                             |
| 88.03151            | 76.520424          | 0.009080005 | NM_17695.1.15                                      | <b>Pbx17</b>                         | F-box and leucine-rich repeat protein 7                                                | 0000086 // G2/M transition of mitotic cell cycle // inferred from direct assay//0007049 // cell cycle // inferred from                                                                                                      |
| 255.51285           | 217.4706           | 0.009358007 | NM_01153.1.17                                      | <b>Tbx5</b>                          | T-box 5                                                                                | 0002009 // morphogenesis of an epithelium // inferred from mutant phenotype//0003166 // bundle of His develop                                                                                                               |
| 154.75983           | 131.20175          | 0.007505782 | NM_01995.1.18                                      | <b>Chst5</b>                         | carbohydrate (N-acetylglucosamine 6-O) sulfotransferase 5                              | 0005975 // carbohydrate metabolic process // inferred from electronic annotation//0006044 // N-acetylglucosami                                                                                                              |
| 34.832626           | 29.465021          | 0.008163204 | NM_01666.1.18                                      | <b>Mtag2</b>                         | metastasis associated gene 2                                                           |                                                                                                                                                                                                                             |
| 178.32079           | 150.26088          | 0.004155105 | NM_00128.1.19                                      | <b>Dtna</b>                          | dystrobrevin alpha                                                                     |                                                                                                                                                                                                                             |
| 496.71188           | 417.74704          | 0.008160782 | NM_17259.1.19                                      | <b>Ar15</b>                          | ADP-ribosylation factor-like 15                                                        | 0007264 // small GTPase mediated signal transduction // inferred from electronic annotation                                                                                                                                 |
| 144.8654            | 121.54545          | 0.007822624 | NM_13868.1.19                                      | <b>Wfp4c12</b>                       | WAP four-disulfide core domain 12                                                      | 0010466 // negative regulation of peptidase activity // inferred from electronic annotation//0010951 // negative r                                                                                                          |
| 377.6963            | 315.73477          | 0.009568824 | NM_00754.1.20                                      | <b>Prdm1</b>                         | PR domain containing 1, with ZNF domain                                                | 0000122 // negative regulation of transcription from RNA polymerase II promoter // inferred from direct assay//00                                                                                                           |
| 71.98826            | 60.03685           | 0.008354457 | NM_00923.1.20                                      | <b>Sox11</b>                         | SRY (sex determining region Y)-box 11                                                  | 0000122 // negative regulation of transcription from RNA polymerase II promoter // inferred from direct assay//00                                                                                                           |
| 527.78656           | 437.91776          | 0.006835324 | NM_00858.1.21                                      | <b>Mertk</b>                         | c-met proto-oncogene tyrosine kinase                                                   | 0001779 // natural killer cell differentiation // inferred from genetic interaction//0006468 // protein phosphorylat                                                                                                        |
| 327.74048           | 271.418            | 0.006430899 | NM_01087.1.21                                      | <b>Nck2</b>                          | non-catalytic region of tyrosine kinase adaptor protein 2                              | 0001771 // immunological synapse formation // not recorded//0006417 // regulation of translation // inferred fro                                                                                                            |
| 23.078152           | 19.085468          | 0.009757232 | NM_17258.1.21                                      | <b>Tmem63c</b>                       | transmembrane protein 63c                                                              | 0006810 // transport // inferred from electronic annotation//0006811 // ion transport // inferred from electronic                                                                                                           |
| 5445.8486           | 4491.2197          | 0.008105569 | NM_00116.1.21                                      | <b>Dynt11a//Dynt11b//Dynt11//Dy</b>  | dynein light chain Tctex-type 1A//dynein light chain Tctex-type 1B//dynein light chai  | 0000132 // establishment of mitotic spindle orientation // inferred from mutant phenotype//0006810 // transport                                                                                                             |
| 240.80606           | 198.52603          | 0.008427013 | NM_00108.1.21                                      | <b>Bod1</b>                          | biorientation of chromosomes in cell division 1-like                                   | 0006281 // DNA repair // inferred from electronic annotation//0006974 // cellular response to DNA damage stimu                                                                                                              |
| 8141.2065           | 6710.175           | 0.006518072 | NM_00116.1.21                                      | <b>Dynt11b//Dynt11b//Dynt11//Dy</b>  | dynein light chain Tctex-type 1A//dynein light chain Tctex-type 1B//dynein light chai  | 0000132 // establishment of mitotic spindle orientation // inferred from mutant phenotype//0006810 // transport                                                                                                             |
| 391.46735           | 322.5736           | 0.00832384  | NM_01125.1.21                                      | <b>Rbm6</b>                          | RNA binding motif protein 6                                                            |                                                                                                                                                                                                                             |
| 105.23527           | 86.58028           | 0.00997164  | -1.22                                              | <b>A1428301</b>                      | expressed sequence A1428301                                                            |                                                                                                                                                                                                                             |
| 35.787224           | 29.421627          | 0.008334961 | NM_15310.1.22                                      | <b>Padi6</b>                         | peptidyl arginine deiminase, type VI                                                   | 0007010 // cytoskeleton organization // inferred from mutant phenotype//0007028 // cytoplasm organization // ir                                                                                                             |
| 50.67753            | 41.661213          | 0.005942517 | NM_00103.1.22                                      | <b>Rmi2</b>                          | RMI2, RecQ mediated genome instability 2, homolog (S. cerevisiae)                      | 0006260 // DNA replication // inferred from electronic annotation                                                                                                                                                           |
| 1008.2284           | 826.8482           | 0.006630503 | NM_00116.1.22                                      | <b>Add3</b>                          | adducin 3 (gamma)                                                                      | 0042493 // response to drug // not recorded                                                                                                                                                                                 |
| 331.26093           | 271.58884          | 0.003984637 | NM_00128.1.22                                      | <b>Ddx46</b>                         | DEAD (Asp-Glu-Ala-Asp) box polypeptide 46                                              | 0000398 // mRNA splicing, via spliceosome // not recorded//0006397 // mRNA processing // inferred from electro                                                                                                              |
| 291.13568           | 238.61769          | 0.004497157 | NM_01970.1.22                                      | <b>Cdh13</b>                         | cadherin 13                                                                            | 0000278 // mitotic cell cycle // inferred from electronic annotation//0001558 // regulation of cell growth // infer                                                                                                         |
| 190.66716           | 156.093            | 0.009322567 | NM_00870.1.22                                      | <b>Nqo1</b>                          | NAD(P)H dehydrogenase, quinone 1                                                       | 0006801 // superoxide metabolic process // not recorded//0006979 // response to oxidative stress // inferred from                                                                                                           |
| 270.69284           | 221.52563          | 0.008234817 | NM_01179.1.22                                      | <b>Car14</b>                         | carbonic anhydrase 14                                                                  | 0006885 // regulation of pH // inferred by curator//0008152 // metabolic process // inferred from electronic anno                                                                                                           |
| 156.62955           | 128.11458          | 0.008070216 | NM_18299.1.22                                      | <b>Tmem59l</b>                       | transmembrane protein 59-like                                                          |                                                                                                                                                                                                                             |
| 192.96407           | 157.63745          | 0.003455828 | NM_00108.1.22                                      | <b>Rsf1</b>                          | remodeling and spacing factor 1                                                        | 0006334 // nucleosome assembly // not recorded//0006338 // chromatin remodeling // not recorded//0006352 //                                                                                                                 |
| 2334.7888           | 1906.2751          | 0.007780545 | NM_02139.1.22                                      | <b>Slc43a3</b>                       | solute carrier family 43, member 3                                                     | 0055085 // transmembrane transport // inferred from electronic annotation                                                                                                                                                   |
| 330.9814            | 269.91238          | 0.00287453  | NM_00108.1.23                                      | <b>Chd2//1810026805Rik</b>           | chromodomain helicase DNA binding protein 2//RIKEN cDNA 1810026805 gene                | 0006351 // transcription, DNA-templated // inferred from electronic annotation//0006355 // regulation of transcri                                                                                                           |
| 351.91345           | 286.9263           | 0.005019383 | NM_15380.1.23                                      | <b>Dntip2</b>                        | deoxy nucleotidyltransferase, terminal, interacting protein 2                          | 0006351 // transcription, DNA-templated // inferred from electronic annotation//0006355 // regulation of transcri                                                                                                           |
| 549.52026           | 447.88007          | 0.003894585 | NM_00103.1.23                                      | <b>Cntf//Zfp91//Zfp91Cntf</b>        | ciliary neurotrophic factor//zinc finger protein 91//Zfp91-Cntf readthrough transcript | 0007250 // activation of NF-kappaB-inducing kinase activity // not recorded//0007259 // JAK-STAT cascade // not r                                                                                                           |
| 1724.6565           | 1404.5717          | 0.009684066 | NM_01019.1.23                                      | <b>Fgf1</b>                          | fibroblast growth factor 1                                                             | 0001525 // angiogenesis // inferred from electronic annotation//0001759 // organ induction // inferred from direc                                                                                                           |
| 151.7211            | 123.1564           | 0.002375387 | NM_01876.1.23                                      | <b>Chst2</b>                         | carbohydrate sulfotransferase 2                                                        | 0005975 // carbohydrate metabolic process // inferred from electronic annotation//0006044 // N-acetylglucosami                                                                                                              |
| 124.54507           | 100.91543          | 0.00902426  | NM_00100.1.23                                      | <b>Armc6</b>                         | armadillo repeat containing, X-linked 6                                                |                                                                                                                                                                                                                             |
| 307.45016           | 247.00066          | 0.006611202 | NM_00117.1.24                                      | <b>Rapgef3</b>                       | Rap guanine nucleotide exchange factor (GEF) 3                                         | 0001525 // angiogenesis // inferred from electronic annotation//0001932 // regulation of protein phosphorylation                                                                                                            |
| 80.819595           | 64.91005           | 0.002225848 | NM_00100.1.25                                      | <b>Tro</b>                           | trophinin                                                                              | 0030308 // negative regulation of cell growth // inferred from direct assay                                                                                                                                                 |
| 464.0766            | 372.63522          | 0.006544279 | NM_17865.1.25                                      | <b>Pkn2</b>                          | protein kinase N2                                                                      | 0006351 // transcription, DNA-templated // inferred from electronic annotation//0006355 // regulation of transcri                                                                                                           |
| 513.2304            | 412.08582          | 0.005533211 | NM_02993.1.25                                      | <b>Chst15</b>                        | carbohydrate (N-acetylglucosamine 4-sulfate 6-O) sulfotransferase 15                   | 0019139 // hexose biosynthetic process // not recorded                                                                                                                                                                      |
| 2047.4869           | 1635.7606          | 0.006902511 | NM_03331.1.25                                      | <b>Slc2a21</b>                       | solute carrier organic anion transporter family, member 2a1                            | 0006810 // transport // inferred from electronic annotation//0006811 // ion transport // inferred from electronic                                                                                                           |
| 554.6338            | 442.89008          | 0.002821337 | NM_00108.1.25                                      | <b>Pph1n1</b>                        | pheraphillin 1                                                                         | 0006351 // transcription, DNA-templated // inferred from electronic annotation//0006355 // regulation of transcri                                                                                                           |
| 569.11163           | 454.33658          | 0.008331779 | NM_00104.1.25                                      | <b>Arrc4</b>                         | arrestin domain containing 4                                                           | 0051443 // positive regulation of ubiquitin-protein transferase activity // not recorded                                                                                                                                    |
| 790.74384           | 630.491            | 0.009492315 | NM_00103.1.25                                      | <b>Xaf1</b>                          | XIAP associated factor 1                                                               | 0006915 // apoptotic process // inferred from electronic annotation//0031333 // negative regulation of protein co                                                                                                           |
| 146.76526           | 116.8441           | 0.004715547 | NM_00103.1.26                                      | <b>4932431P20Rik</b>                 | RIKEN cDNA 4932431P20 gene                                                             |                                                                                                                                                                                                                             |
| 559.0871            | 444.96008          | 0.0059986   | NM_00884.1.26                                      | <b>Hig1b</b>                         | HIG1 domain family, member 1B                                                          |                                                                                                                                                                                                                             |
| 5264.8296           | 4175.985           | 0.004329287 | NM_00116.1.26                                      | <b>Csd1</b>                          | cold shock domain containing E1, RNA binding                                           | 0006355 // regulation of transcription, DNA-templated // inferred from electronic annotation//00070966 // nuclear                                                                                                           |
| 40.666904           | 32.248867          | 0.003652636 | -1.26                                              | <b>D12Etd673e</b>                    | DNA segment, Chr 12, ERATO D61 673, expressed                                          |                                                                                                                                                                                                                             |
| 2245.788            | 1780.178           | 0.00854816  | NM_01141.1.26                                      | <b>Smarca2</b>                       | SWI/SNF related, matrix associated, actin dependent regulator of chromatin, subfamily  | 0006325 // chromatin organization // traceable author statement//0006334 // nucleosome assembly // traceable i                                                                                                              |
| 21.243055           | 16.822937          | 0.008495412 | NM_01378.1.26                                      | <b>Mme11</b>                         | membrane metallo-endopeptidase-like 1                                                  | 0006508 // proteolysis // inferred from electronic annotation                                                                                                                                                               |
| 553.0098            | 437.9377           | 0.006690188 | NM_15317.1.26                                      | <b>Gimap6</b>                        | GTPase, IMAP family member 6                                                           |                                                                                                                                                                                                                             |
| 1626.4589           | 1286.786           | 0.009155978 | NM_00103.1.26                                      | <b>Myap</b>                          | myocardial zonula adherens protein                                                     |                                                                                                                                                                                                                             |
| 1230.0446           | 972.98663          | 0.009750093 | NM_00128.1.26                                      | <b>Angpt1</b>                        | angiopoietin 1                                                                         | 0035556 // intracellular signal transduction // inferred from direct assay                                                                                                                                                  |
| 405.00385           | 319.95724          | 0.004533111 | NM_00103.1.27                                      | <b>Gng2</b>                          | guanine nucleotide binding protein (G protein), gamma 2                                | 0001525 // angiogenesis // inferred from direct assay//0001525 // angiogenesis // inferred from mutant phenotyp                                                                                                             |
| 2507.4622           | 1980.404           | 0.006936397 | NM_00130.1.27                                      | <b>Cdkn2c</b>                        | cyclin-dependent kinase inhibitor 2C (p18, inhibits CDK4)                              | 00007165 // signal transduction // inferred from electronic annotation//0007186 // G-protein coupled receptor sign                                                                                                          |
| 2997.1758           | 2367.149           | 0.007392416 | NM_00102.1.27                                      | <b>Npnt</b>                          | neponectin                                                                             | 0000079 // regulation of cyclin-dependent protein serine/threonine kinase activity // not recorded//0000082 // G1                                                                                                           |
| 69.42604            | 54.780785          | 0.009373836 | NM_01347.1.27                                      | <b>ApoH</b>                          | apolipoprotein H                                                                       | 0001657 // ureteric bud development // inferred from mutant phenotype//0001658 // branching involved in urete                                                                                                               |
| 573.24414           | 452.25226          | 0.005162949 | NM_01033.1.27                                      | <b>Ednra</b>                         | endothelin receptor type A                                                             | 0001937 // negative regulation of endothelial cell proliferation // not recorded//0006641 // triglyceride metabolic                                                                                                         |
| 158.23666           | 124.64604          | 0.007013865 | NM_00116.1.27                                      | <b>Endou</b>                         | endonuclease, poly-U-specific                                                          | 0001569 // patterning of blood vessels // inferred from genetic interaction//0001666 // response to hypoxia // inf                                                                                                          |
| 294.50735           | 231.69405          | 0.004888337 | NM_01167.1.27                                      | <b>Ulgc</b>                          | UDP-glucose ceramide glucosyltransferase                                               | 0006508 // proteolysis // not recorded//0006898 // receptor-mediated endocytosis // inferred from electronic anno                                                                                                           |
|                     |                    |             |                                                    |                                      |                                                                                        | 0006629 // lipid metabolic process // inferred from electronic annotation//0006665 // sphingolipid metabolic proc                                                                                                           |

| [C3H/HeN, Air](raw) | [C3H/HeN, O2](raw) | p           | RefSeq Tra FC (neonate-Air vs neonate-O2 at PND56) | Gene Symbol                           | Gene Title                                                                             | Gene Ontology Biological Process                                                                                     |
|---------------------|--------------------|-------------|----------------------------------------------------|---------------------------------------|----------------------------------------------------------------------------------------|----------------------------------------------------------------------------------------------------------------------|
| 1354.9279           | 1060.6588          | 0.005993265 | NM_18132-1.28                                      | <b>Ctcf</b>                           | CCCTC-binding factor                                                                   | 0000122 // negative regulation of transcription from RNA polymerase II promoter // inferred from mutant phenotype    |
| 133.64636           | 104.477394         | 0.006932467 | NM_01953-1.28                                      | <b>Sh3gl2</b>                         | SH3 domain GRB2-like 2                                                                 | 0002090 // regulation of receptor internalization // inferred from direct assay//0006897 // endocytosis // inferred  |
| 61.262894           | 47.789597          | 0.004389897 | NM_02348-1.28                                      | <b>Syncl</b>                          | syncoilin                                                                              | 0045103 // intermediate filament-based process // inferred from direct assay                                         |
| 149.13467           | 115.98326          | 0.007513741 | NM_00119-1.29                                      | <b>Ddx55</b>                          | DEAD (Asp-Glu-Ala-Asp) box polypeptide 55                                              | 0010501 // RNA secondary structure unwinding // not recorded                                                         |
| 53.087296           | 41.207138          | 0.006724734 | NM_01674-1.29                                      | <b>Mylbph</b>                         | myosin binding protein H                                                               | 0007155 // cell adhesion // inferred from electronic annotation                                                      |
| 1363.2074           | 1057.7847          | 0.004989315 | NM_00116-1.29                                      | <b>Cytl3</b>                          | cytohesin 3                                                                            | 0016192 // vesicle-mediated transport // ---//0032012 // regulation of ARF protein signal transduction // inferred I |
| 962.7201            | 743.7094           | 0.003754453 | NM_02666-1.29                                      | <b>Ubn1</b>                           | ubiquitin 1                                                                            | 0006336 // DNA replication-independent nucleosome assembly // not recorded//0006357 // regulation of transcrip       |
| 525.04517           | 405.395117         | 0.002391014 | NM_00129-1.30                                      | <b>Elf2</b>                           | E74-like factor 2                                                                      | 0006351 // transcription, DNA-templated // inferred from electronic annotation//0006355 // regulation of transcri    |
| 256.32123           | 197.8123           | 0.006339138 | NM_01737-1.30                                      | <b>Tuba8</b>                          | tubulin, alpha 8                                                                       | 0000226 // microtubule cytoskeleton organization // not recorded//0007017 // microtubule-based process // infer      |
| 351.07025           | 270.8946           | 0.003168191 | NM_12790-1.30                                      | <b>Olfml1</b>                         | olfactomedin-like 1                                                                    |                                                                                                                      |
| 1304.5967           | 1006.64343         | 0.002300988 | NM_00103-1.30                                      | <b>Mez2a</b>                          | myocyte enhancer factor 2A                                                             | 0000002 // mitochondrial genome maintenance // inferred from mutant phenotype//0000122 // negative regulati          |
| 379.8684            | 292.96353          | 0.007960286 | NM_01886-1.30                                      | <b>Wisp1</b>                          | WNT1 inducible signaling pathway protein 1                                             | 0001558 // regulation of cell growth // inferred from electronic annotation//0007155 // cell adhesion // not recor   |
| 5782.0254           | 4450.121           | 0.006109754 | NM_00116-1.30                                      | <b>Dynlt1-ps1//Dynlt1a//Dynlt1b//</b> | dynein light chain Tctex-type 1, pseudogene 1//dynein light chain Tctex-type 1A//d     | 0000132 // establishment of mitotic spindle orientation // inferred from mutant phenotype//0006810 // transport      |
| 107.10526           | 82.39641           | 0.001689527 | NM_00116-1.30                                      | <b>Dcaf17</b>                         | DOB1 and CUL4 associated factor 17                                                     | 0016567 // protein ubiquitination // inferred from electronic annotation                                             |
| 3882.4314           | 2980.9773          | 0.009244435 | NM_00124-1.30                                      | <b>Col6a3</b>                         | collagen, type VI, alpha 3                                                             | 0010951 // negative regulation of endopeptidase activity // inferred from electronic annotation                      |
| 122.36338           | 93.879654          | 0.009531946 | NM_02389-1.30                                      | <b>Sapcd1</b>                         | suppressor APC domain containing 1                                                     |                                                                                                                      |
| 526.7514            | 403.9221           | 0.005635986 | NM_13377-1.30                                      | <b>Stard4</b>                         | STAR-related lipid transfer (START) domain containing 4                                | 0006810 // transport // inferred from electronic annotation//0006869 // lipid transport // inferred from electronic  |
| 1877.9907           | 1432.2484          | 0.002843046 | NM_15351-1.31                                      | <b>BCO28528</b>                       | BCO2 sequence BCO28528                                                                 |                                                                                                                      |
| 5889.2046           | 4482.737           | 0.003757528 | NM_01023-1.31                                      | <b>Fmo1</b>                           | flavin containing monooxygenase 1                                                      | 0006082 // organic acid metabolic process // not recorded//0006970 // response to osmotic stress // inferred from    |
| 826.41766           | 628.5506           | 0.001562718 | NM_00115-1.31                                      | <b>Gjc1</b>                           | gap junction protein, gamma 1                                                          | 0001570 // vasculogenesis // inferred from mutant phenotype//0007154 // cell communication // inferred from el       |
| 4092.0732           | 3109.9126          | 0.009418829 | NM_14605-1.32                                      | <b>Fermt2</b>                         | fermitin family homolog 2 (Drosophila)                                                 | 0007155 // cell adhesion // inferred from electronic annotation//0007160 // cell-matrix adhesion // inferred from    |
| 94.37079            | 71.71373           | 0.00626986  | NM_00839-1.32                                      | <b>Irga2</b>                          | integrin alpha 2                                                                       | 0002687 // positive regulation of leukocyte migration // not recorded//0006929 // substrate-dependent cell migra     |
| 2324.9429           | 1764.7217          | 9.17E-04    | NM_00824-1.32                                      | <b>P170</b>                           | phospholipid phosphatase 1                                                             | 0006470 // protein dephosphorylation // inferred from direct assay//0006470 // protein dephosphorylation // trac     |
| 569.5836            | 431.7645           | 0.008394625 | NM_00127-1.32                                      | <b>Ackr2</b>                          | atypical chemokine receptor 2                                                          | 0006898 // receptor-mediated endocytosis // not recorded//0006935 // chemotaxis // inferred from electronic an       |
| 141.8412            | 107.273445         | 0.007077453 | NM_00650-1.32                                      | <b>Adhb6</b>                          | alcohol dehydrogenase 6B (class V)                                                     | 0055114 // oxidation-reduction process // inferred from electronic annotation                                        |
| 599.2929            | 452.55402          | 0.008302302 | NM_17374-1.32                                      | <b>Maoa</b>                           | monoamine oxidase A                                                                    | 0006584 // catecholamine metabolic process // inferred from electronic annotation//0042135 // neurotransmitter       |
| 1421.4601           | 1071.5709          | 0.004672894 | NM_00131-1.33                                      | <b>Crispld2</b>                       | cysteine-rich secretory protein LCLC domain containing 2                               | 0030198 // extracellular matrix organization // inferred from direct assay//0030324 // lung development // inferre   |
| 3688.0056           | 2779.2708          | 0.003744515 | NM_02708-1.33                                      | <b>Clic3</b>                          | chloride intracellular channel 3                                                       | 0006749 // glutathione metabolic process // ---//0006810 // transport // inferred from electronic annotation//000    |
| 2579.1719           | 1941.751           | 0.003241317 | NM_17892-1.33                                      | <b>Afap111</b>                        | actin filament associated protein 1-like 1                                             |                                                                                                                      |
| 739.07855           | 555.992            | 0.006605902 | NM_00116-1.33                                      | <b>Phox</b>                           | phosphorylated adaptor for RNA export                                                  | 0006408 // snRNA export from nucleus // inferred from direct assay//0006810 // transport // inferred from electr     |
| 337.1927            | 253.24078          | 0.008633235 | NM_00111-1.33                                      | <b>Syng1</b>                          | synergin, gamma                                                                        | 0006810 // transport // inferred from electronic annotation//0006897 // endocytosis // inferred from electronic ar   |
| 1685.3572           | 1262.7155          | 0.001672245 | NM_00128-1.33                                      | <b>Daam1</b>                          | dishevelled associated activator of morphogenesis 1                                    | 0016043 // cellular component organization // inferred from electronic annotation//0030036 // actin cytoskeleton     |
| 2721.9685           | 2034.5537          | 0.005853636 | NM_00116-1.34                                      | <b>Snrk</b>                           | SNF related kinase                                                                     | 0006468 // protein phosphorylation // not recorded//0016310 // phosphorylation // inferred from electronic anno      |
| 379.24768           | 282.72717          | 0.005726045 | NM_01381-1.34                                      | <b>Dnah8</b>                          | dynein, axonemal, heavy chain 8                                                        | 0007018 // microtubule-based movement // inferred from electronic annotation//0008152 // metabolic process // inf    |
| 940.12823           | 700.0069           | 0.002964669 | NM_00128-1.34                                      | <b>Elk3</b>                           | ELK3, member of ETS oncogene family                                                    | 0001525 // angiogenesis // inferred from mutant phenotype//0006351 // transcription, DNA-templated // inferred       |
| 58.674236           | 43.522366          | 0.001734882 | NM_01036-1.35                                      | <b>Gypa</b>                           | glycophorin A                                                                          | 0007016 // cytoskeletal anchoring at plasma membrane // inferred from mutant phenotype//0047484 // regulatio         |
| 972.37067           | 721.0148           | 5.93E-04    | NM_00128-1.35                                      | <b>Rcan2</b>                          | regulator of calcineurin 2                                                             | 0006950 // response to stress // inferred from genetic interaction//0006950 // response to stress // inferred from   |
| 749.1642            | 553.1385           | 0.001537129 | NM_02591-1.35                                      | <b>Tmem88</b>                         | transmembrane protein 88                                                               | 0007275 // multicellular organismal development // inferred from electronic annotation//0016055 // Wnt signalin      |
| 477.73456           | 352.49316          | 0.005939077 | NM_14479-1.36                                      | <b>Lmcd1</b>                          | LIM and cysteine-rich domains 1                                                        | 0000122 // negative regulation of transcription from RNA polymerase II promoter // inferred from genetic interacti   |
| 817.06866           | 602.78564          | 0.001245283 | NM_00131-1.36                                      | <b>Prkch</b>                          | protein kinase C, eta                                                                  | 0006468 // protein phosphorylation // not recorded//0010744 // positive regulation of macrophage derived foam        |
| 34.840076           | 25.661274          | 0.006128062 | NM_00891-1.36                                      | <b>Ppy</b>                            | pancreatic polypeptide                                                                 | 0002230 // positive regulation of defense response to virus by host // not recorded//0007218 // neuropeptide sig     |
| 889.69666           | 655.2427           | 0.009978712 | NM_00116-1.36                                      | <b>Cdkn1c</b>                         | cyclin-dependent kinase inhibitor 1C (P57)                                             | 0000122 // negative regulation of transcription from RNA polymerase II promoter // inferred from genetic interacti   |
| 193.39479           | 142.3918           | 6.24E-04    | NM_01184-1.36                                      | <b>Mid2</b>                           | midline 2                                                                              | 0010508 // positive regulation of autophagy // inferred from sequence or structural similarity//0016567 // protein   |
| 174.11421           | 127.99915          | 4.56E-04    | NM_17213-1.36                                      | <b>Adap2</b>                          | ArfGAP with dual PH domains 2                                                          | 0007507 // heart development // non-traceable author statement//0043547 // positive regulation of GTPase activi      |
| 388.07947           | 285.08374          | 8.45E-04    | NM_02608-1.36                                      | <b>Zc3h13</b>                         | zinc finger CCH type containing 13                                                     |                                                                                                                      |
| 290.53336           | 213.34914          | 4.52E-04    | NM_17546-1.36                                      | <b>Nmnat2</b>                         | nicotinamide nucleotide adenylyltransferase 2                                          | 0006767 // water-soluble vitamin metabolic process // not recorded//0009058 // biosynthetic process // inferred I    |
| 3253.2273           | 2385.698           | 0.001249235 | NM_00127-1.36                                      | <b>Dag1</b>                           | dystroglycan 1                                                                         | 0002011 // morphogenesis of an epithelial sheet // inferred from mutant phenotype//0006509 // membrane prot          |
| 9519.707            | 6951.3833          | 0.00549867  | NM_13874-1.37                                      | <b>Sdpr</b>                           | serum deprivation response                                                             | 0045944 // positive regulation of transcription from RNA polymerase II promoter // not recorded                      |
| 757.85187           | 553.33234          | 0.003289562 | NM_00752-1.37                                      | <b>Bcl6b</b>                          | B cell CLL/lymphoma 6, member B                                                        | 0000122 // negative regulation of transcription from RNA polymerase II promoter // inferred from direct assay        |
| 98.634964           | 71.937546          | 0.003878087 | NM_00103-1.37                                      | <b>Zcchc18</b>                        | zinc finger, CCHC domain containing 18                                                 | 0030509 // BMP signaling pathway // not recorded                                                                     |
| 558.375             | 406.41235          | 0.004839883 | NM_08059-1.37                                      | <b>Emid1</b>                          | EM1 domain containing 1                                                                |                                                                                                                      |
| 161.63545           | 117.38556          | 0.009112365 | NM_00799-1.38                                      | <b>Fbp2</b>                           | fructose biphosphatase 2                                                               | 0005975 // carbohydrate metabolic process // inferred from electronic annotation//0006094 // gluconogenesis //       |
| 51.934258           | 37.66331           | 0.004050829 | NM_19903-1.38                                      | <b>Cep135</b>                         | centriole protein 135                                                                  | 0007099 // centriole replication // not recorded//0010457 // centriole-centriole cohesion // not recorded            |
| 1001.4492           | 724.69794          | 0.006075849 | NM_03356-1.38                                      | <b>Klf7</b>                           | Kruppel-like factor 7 (ubiquitous)                                                     | 0006351 // transcription, DNA-templated // inferred from electronic annotation//0006355 // regulation of transcri    |
| 1332.6403           | 963.85547          | 0.001487617 | NM_01180-1.38                                      | <b>Ets2</b>                           | E26 avian leukemia oncogene 2, 3' domain                                               | 0000122 // negative regulation of transcription from RNA polymerase II promoter // not recorded//0001712 // ect      |
| 930.3197            | 672.4694           | 0.001638608 | NM_18154-1.38                                      | <b>Nostrin</b>                        | nitric oxide synthase trafficker                                                       | 0006897 // endocytosis // inferred from electronic annotation//0045892 // negative regulation of transcription, DT   |
| 120.21006           | 86.03727           | 0.001692956 | NM_00129-1.40                                      | <b>LOC102641273//Ttc14</b>            | tetratricopeptide repeat protein 14 pseudogene//tetratricopeptide repeat domain 14     | 0001947 // heart looping // ---//0003341 // cilium movement // ---//0003356 // regulation of cilium beat frequ       |
| 54.446414           | 38.943493          | 0.002706605 | NM_01160-1.40                                      | <b>Tnfrsf17</b>                       | tumor necrosis factor receptor superfamily, member 17                                  | 0002250 // adaptive immune response // inferred from electronic annotation//0002260 // lymphocyte homeostasi         |
| 2082.3865           | 1488.7704          | 2.93E-04    | NM_00108-1.40                                      | <b>Scln3b</b>                         | sodium channel, voltage-gated, type III, beta                                          | 0006810 // transport // inferred from electronic annotation//0006811 // ion transport // inferred from electronic i  |
| 1169.6152           | 829.3296           | 0.006166396 | NM_00111-1.41                                      | <b>Ddx6</b>                           | DEAD (Asp-Glu-Ala-Asp) box polypeptide 6                                               | 0006417 // regulation of translation // not recorded//0010501 // RNA secondary structure unwinding // not recor      |
| 333.38388           | 236.18637          | 0.004603687 | NM_01072-1.41                                      | <b>Lipg</b>                           | lipase, endocytic                                                                      | 0006629 // lipid metabolic process // inferred from electronic annotation//0007584 // response to nutrient // infe   |
| 7442.302            | 5272.0146          | 0.002912802 | NM_00792-1.41                                      | <b>Emp2</b>                           | epithelial membrane protein 2                                                          | 0001765 // membrane raft assembly // inferred from direct assay//0001913 // T cell mediated cytotoxicity // infer    |
| 2587.8662           | 1826.6166          | 0.001730402 | NM_02583-1.42                                      | <b>Baiap211</b>                       | BAI1-associated protein 2-like 1                                                       | 0007009 // plasma membrane organization // inferred from electronic annotation//0008286 // insulin receptor sig      |
| 1083.4781           | 764.56384          | 0.006863724 | NM_02847-1.42                                      | <b>Bmpcr</b>                          | BMP-binding endothelial regulator                                                      | 0001657 // ureteric bud development // inferred from expression pattern//0002043 // blood vessel endothelial ce      |
| 1097.989            | 774.5618           | 7.62E-04    | NM_18331-1.42                                      | <b>Syner</b>                          | synerin, intermediate filament protein                                                 | 0045104 // intermediate filament cytoskeleton organization // inferred from electronic annotation                    |
| 1396.2255           | 980.5527           | 0.002823039 | NM_00116-1.42                                      | <b>Gucy1b3</b>                        | guanylate cyclase 1, soluble, beta 3                                                   | 0006182 // cGMP biosynthetic process // not recorded//0001665 // signal transduction // not recorded//0007263        |
| 394.7551            | 276.3262           | 0.002817492 | NM_01737-1.43                                      | <b>Pcdh12</b>                         | protocadherin 12                                                                       | 0005977 // glycogen metabolic process // inferred from mutant phenotype//0007155 // cell adhesion // inferred fr     |
| 90.344536           | 63.157875          | 0.002427835 | NM_02347-1.43                                      | <b>Uplka3</b>                         | urokinase 3A                                                                           | 0009092 // cell morphogenesis // inferred from mutant phenotype//0001822 // kidney development // inferred fr        |
| 1124.4457           | 784.2161           | 0.002098427 | NM_01158-1.43                                      | <b>Nrlid2</b>                         | nuclear receptor subfamily 1, group D, member 2                                        | 0006351 // transcription, DNA-templated // inferred from electronic annotation//0006355 // regulation of transcri    |
| 83.67772            | 58.288177          | 1.83E-04    | NM_00103-1.44                                      | <b>Wfdc6a</b>                         | WAP four-disulfide core domain 6A                                                      | 0010466 // negative regulation of peptidase activity // not recorded//0010951 // negative regulation of endopept     |
| 880.44916           | 599.7348           | 0.003583245 | NM_14614-1.47                                      | <b>Jak1</b>                           | Janus kinase 1                                                                         | 0006468 // protein phosphorylation // inferred from electronic annotation//0007167 // enzyme linked receptor pr      |
| 738.8207            | 503.1607           | 0.006593663 | NM_02445-1.47                                      | <b>Luzp1</b>                          | leucine zipper protein 1                                                               | 0003281 // protein septum development // inferred from mutant phenotype//0021503 // neural fold bending //           |
| 2401.713            | 1635.0742          | 7.67E-04    | NM_00119-1.47                                      | <b>Lims1</b>                          | LIM and senescent cell antigen-like domains 1                                          | 0007160 // cell-matrix adhesion // inferred from mutant phenotype//0007163 // establishment or maintenance of        |
| 124.23487           | 84.51717           | 0.001011481 | NM_00750-1.47                                      | <b>Atp2a1</b>                         | ATPase, Ca++ transporting, cardiac muscle, fast twitch 1                               | 0006810 // transport // inferred from electronic annotation//0006811 // ion transport // inferred from electronic i  |
| 53.983192           | 36.614254          | 0.003483273 | NM_00127-1.47                                      | <b>Ahsg</b>                           | alpha-2-HS-glycoprotein                                                                | 0001503 // ossification // inferred from direct assay//0006461 // protein complex assembly // not recorded//0000     |
| 155.99841           | 105.64493          | 0.001898921 | NM_00103-1.48                                      | <b>Cntf</b>                           | ciliary neurotrophic factor//zinc finger protein 91//Zfp91-Cntf readthrough transcript | 0007250 // activation of NF-kappaB-inducing kinase activity // not recorded//0007259 // JAK-STAT cascade // not r    |
| 1211.9332           | 820.30225          | 4.85E-04    | NM_02580-1.48                                      | <b>Sclca59</b>                        | solute carrier family 16 (monocarboxylic acid transporters), member 9                  | 0006810 // transport // inferred from electronic annotation//0015718 // monocarboxylic acid transport // ---//00     |
| 131.06548           | 87.92938           | 0.001745614 | NM_00131-1.49                                      | <b>Ajt7</b>                           | activating transcription factor 7                                                      | 0000122 // negative regulation of transcription from RNA polymerase II promoter // not recorded//0006351 // tra      |
| 106.741684          | 71.49692           | 0.006861682 | NM_00112-1.49                                      | <b>Trp53</b>                          | transformation related protein 53                                                      | 0000060 // protein import into nucleus, translocation // inferred from direct assay//0000122 // negative regulatio   |
| 1236.9542           | 821.3603           | 0.001469482 | NM_00865-1.51                                      | <b>Gadd45b</b>                        | growth arrest and DNA-damage-inducible 45 beta                                         | 0000185 // activation of MAPKK activity // not recorded//0000186 // activation of MAPKK activity // inferred fro     |
| 245.32516           | 162.25024          | 1.01E-04    | NM_00112-1.51                                      | <b>Igf2</b>                           | insulin-like growth factor 2                                                           | 0001503 // ossification // inferred from electronic annotation//0001649 // osteoblast differentiation // inferred fr |

| [C3H/HeN, Air](raw) | [C3H/HeN, O2](raw) | p           | RefSeq Tra FC (neonate-Air vs neonate-O2 at PND56) | Gene Symbol                   | Gene Title                                                                      | Gene Ontology Biological Process                                                                                      |
|---------------------|--------------------|-------------|----------------------------------------------------|-------------------------------|---------------------------------------------------------------------------------|-----------------------------------------------------------------------------------------------------------------------|
| 93.168015           | 61.005875          | 9.70E-05    | NM_15307 -1.53                                     | <b>Gprc6a</b>                 | G protein-coupled receptor, family C, group 6, member A                         | 0007165 // signal transduction // inferred from electronic annotation//0007186 // G-protein coupled receptor sign     |
| 22.566032           | 14.750648          | 3.43E-04    | NM_01126 -1.53                                     | <b>Rhag</b>                   | Rhesus blood group-associated A glycoprotein                                    | 0006810 // transport // inferred from electronic annotation//0006873 // cellular ion homeostasis // not recorded/     |
| 822.4235            | 537.4037           | 2.35E-04    | NM_00764 -1.53                                     | <b>Cd38</b>                   | CD38 antigen                                                                    | 0001666 // response to hypoxia // not recorded//0007204 // positive regulation of cytosolic calcium ion concentra     |
| 1286.883            | 836.3257           | 0.00551773  | NM_00125 -1.54                                     | <b>Mest</b>                   | mesoderm specific transcript                                                    | 0007498 // mesoderm development // not recorded//0008152 // metabolic process // not recorded//0010883 //             |
| 658.00104           | 422.8983           | 9.08E-04    | NM_15339 -1.56                                     | <b>Col23a1</b>                | collagen, type XXIII, alpha 1                                                   | 0007207 // protein homotrimerization // not recorded                                                                  |
| 1259.2003           | 804.66504          | 0.005947487 | NM_17835 -1.56                                     | <b>Klf11</b>                  | Kruppel-like factor 11                                                          | 0000083 // regulation of transcription involved in G1/S transition of mitotic cell cycle // not recorded//0000122 //  |
| 3325.123            | 2088.996           | 0.002306288 | NM_01089 -1.59                                     | <b>Ned4d</b>                  | neural precursor cell expressed, developmentally down-regulated 4               | 0000122 // negative regulation of transcription from RNA polymerase II promoter // inferred from mutant phenoty       |
| 379.88022           | 234.83817          | 0.006076203 | NM_02996 -1.62                                     | <b>9230104L09Rik</b>          | RIKEN cDNA 9230104L09 gene                                                      | 0010466 // negative regulation of peptidase activity // inferred from electronic annotation//0010951 // negative r    |
| 236.66086           | 145.57121          | 0.006097783 | NM_00790 -1.63                                     | <b>Edn3</b>                   | endothelin 3                                                                    | 0001755 // neural crest cell migration // inferred from mutant phenotype//0002690 // positive regulation of leuko     |
| 347.34525           | 212.3035           | 0.003057372 | NM_01140 -1.64                                     | <b>Slc4a1</b>                 | solute carrier family 4 (anion exchanger), member 1                             | 0006810 // transport // inferred from electronic annotation//0006811 // ion transport // inferred from electronic i   |
| 297.37445           | 180.14381          | 1.97E-04    | NM_00129 -1.65                                     | <b>Adcy8</b>                  | adenylate cyclase 8                                                             | 0006171 // cAMP biosynthetic process // not recorded//0007189 // adenylate cyclase-activating G-protein couple        |
| 767.60785           | 453.8218           | 0.00566817  | NM_15345 -1.69                                     | <b>Dusp7</b>                  | dual specificity phosphatase 7                                                  | 0000188 // inactivation of MAPK activity // not recorded//0006470 // protein dephosphorylation // not recorded//      |
| 34.509075           | 20.343918          | 0.008078477 | NM_18184 -1.70                                     | <b>Fgb</b>                    | fibrinogen beta chain                                                           | 0002250 // adaptive immune response // inferred from electronic annotation//0002376 // immune system process          |
| 525.4309            | 308.6053           | 0.002106925 | NM_01191 -1.70                                     | <b>Xrn2</b>                   | 5'-3' exoribonuclease 2                                                         | 0000738 // DNA catabolic process, exonucleolytic // not recorded//0006139 // nucleobase-containing compound n         |
| 293.49832           | 169.69853          | 0.007421678 | NM_00117 -1.73                                     | <b>Cyp26b1</b>                | cytochrome P450, family 26, subfamily b, polypeptide 1                          | 0001709 // cell fate determination // inferred from mutant phenotype//0001768 // establishment of T cell polarity     |
| 217.13885           | 125.328575         | 0.006831768 | NM_00119 -1.73                                     | <b>Bend7</b>                  | BEN domain containing 7                                                         |                                                                                                                       |
| 191.05328           | 106.985535         | 6.21E-04    | NM_15340 -1.79                                     | <b>Neur3</b>                  | neurallized E3 ubiquitin protein ligase 3                                       | 0016567 // protein ubiquitination // inferred from genetic interaction                                                |
| 1026.606            | 574.3703           | 2.29E-04    | NM_00790 -1.79                                     | <b>Sip1</b>                   | sphingosine-1-phosphate receptor 1                                              | 0001525 // angiogenesis // inferred from direct assay//0001955 // blood vessel maturation // inferred from mutan      |
| 3852.278            | 2151.8381          | 0.001361943 | NR_00284 -1.79                                     | <b>Mala1</b>                  | metastasis associated lung adenocarcinoma transcript 1 (non-coding RNA)         | 0000381 // regulation of alternative mRNA splicing, via spliceosome // inferred from mutant phenotype//0035063        |
| 185.40262           | 97.6724            | 0.003106583 | XR_378520 -1.90                                    | <b>Gm33248</b>                | predicted gene, 33248                                                           |                                                                                                                       |
| 310.7118            | 162.58124          | 1.95E-05    | NM_01073 -1.91                                     | <b>Zbtb7a</b>                 | zinc finger and BTB domain containing 7a                                        | 0000122 // negative regulation of transcription from RNA polymerase II promoter // inferred from direct assay//00     |
| 408.60727           | 199.38464          | 0.005052957 | NM_02728 -2.05                                     | <b>Nt5dc2</b>                 | 5'-nucleotidase domain containing 2                                             | 0006470 // protein dephosphorylation // --//0016311 // dephosphorylation // --                                        |
| 439.93048           | 192.35175          | 0.001140304 | NM_14543 -2.29                                     | <b>Nr1d1</b>                  | nuclear receptor subfamily 1, group D, member 1                                 | 0000122 // negative regulation of transcription from RNA polymerase II promoter // not recorded//0005978 // gly       |
| 377.5021            | 162.36482          | 0.002887926 | NM_00127 -2.33                                     | <b>Acta1</b>                  | actin, alpha 1, skeletal muscle                                                 | 0009612 // response to mechanical stimulus // inferred from electronic annotation//0009991 // response to extrac      |
| 235.96065           | 101.15667          | 5.56E-05    | NM_01697 -2.33                                     | <b>Dbp</b>                    | D site albumin promoter binding protein                                         | 0001889 // liver development // inferred from electronic annotation//0006351 // transcription, DNA-templated //       |
| 831.9619            | 229.24924          | 6.07E-04    | NR_00159 -3.63                                     | <b>H19</b>                    | H19, imprinted maternally expressed transcript                                  | 0002825 // negative regulation of cell proliferation // inferred from genetic interaction//0010468 // regulation of g |
| 225.87642           | 36.23993           | 0.009964186 | NM_02528 -6.23                                     | <b>Stfa3//BC100530//Stfa1</b> | stefin A3//cDNA sequence BC100530//stefin A1                                    | 0010466 // negative regulation of peptidase activity // inferred from electronic annotation//0010951 // negative r    |
| 371.3008            | 47.51264           | 0.009735196 | NM_00108 -7.81                                     | <b>BC100530//Stfa1//Stfa3</b> | cDNA sequence BC100530//stefin A1//stefin A3                                    | 0010466 // negative regulation of peptidase activity // inferred from electronic annotation//0010951 // negative r    |
| 261.86676           | 16.937466          | 0.004212725 | NM_01201 -15.46                                    | <b>Ej2s3y</b>                 | eukaryotic translation initiation factor 2, subunit 3, structural gene Y-linked | 0001731 // formation of translation preinitiation complex // --//0006412 // translation // inferred from electronic   |
| 497.55447           | 17.751776          | 0.003091645 | NM_01200 -28.03                                    | <b>Ddx3y</b>                  | DEAD (Asp-Glu-Ala-Asp) box polypeptide 3, Y-linked                              | 0006413 // translational initiation // not recorded//0007059 // chromosome segregation // not recorded//001044        |
