# Supplementary material for: Glutathione reductase deficiency alters lung development and hyperoxic responses in neonatal mice
Source: PubMed Central journal article supplement — Redox Biol. 2020 Nov 13;38:101797. doi: 10.1016/j.redox.2020.101797 (PMC7708869; doi:10.1016/j.redox.2020.101797), 2020-11-13
Supplement: mmc8.pdf [file mmc8.pdf]

| p (Genotype) | p (Exposure) | [CH/HeN, Air][raw] | [CH/HeN, O2][raw] | [Gr-KO, Air][raw] | [Gr-KO, O2][raw]               | RefSeq Transcript ID           | p (Genotype-Exposure) | FC in WT (Air-O2) | FC in KO (Air-O2) | FD (WT O2 vs KO O2) | Gene Symbol           | Gene Title                                                       | Gene Ontology Biological Process                                                                                                                 |
|--------------|--------------|--------------------|-------------------|-------------------|--------------------------------|--------------------------------|-----------------------|-------------------|-------------------|---------------------|-----------------------|------------------------------------------------------------------|--------------------------------------------------------------------------------------------------------------------------------------------------|
| 0.2903104    | 0.025988186  | 318.0659           | 331.1289          | 335.27103         | 298.3071                       | NM_001100591//NM_0007281573    | 1.04                  | -1.12             | -1.11             |                     | <i>Rch2</i>           | ring finger and CCHC-type zinc finger domains 2                  | 0000209 // protein polyubiquitination // not recorded//0001782 // B cell homeostasis // inferred from genetic interaction//0009791 // post-er    |
| 0.07800728   | 0.8453955    | 16.340852          | 17.858604         | 17.322233         | 16.055773                      | NM_023135                      | 1.07                  | -1.08             | -1.11             |                     | <i>Sulf1zf</i>        | sulfotransferase family 1E, member 1                             | 0007565 // female pregnancy // inferred from mutant phenotype//0006210 // estrogen metabolic process // inferred from direct assay//00086        |
| 0.47712605   | 0.08072522   | 798.17804          | 827.0046          | 824.5663          | 742.5771                       | NM_027098//NM_00548005864975   | 1.04                  | -1.11             | -1.11             |                     | <i>Mpi130</i>         | mitochondrial ribosomal protein L30                              |                                                                                                                                                  |
| 0.33910736   | 0.8743928    | 23.702065          | 26.93612          | 26.731722         | 24.161081                      | NM_183030//NR_02808.0001805932 | 1.14                  | -1.11             | -1.11             |                     | <i>Smi102a</i>        | small integral membrane protein 10 like 2A                       |                                                                                                                                                  |
| 0.037662134  | 0.3203201    | 218.51404          | 234.4993          | 226.06665         | 210.28682                      | NM_025578                      | 1.07                  | -1.07             | -1.12             |                     | <i>Mps25</i>          | mitochondrial ribosomal protein S25                              | 0032543 // mitochondrial translation // inferred by curator                                                                                      |
| 0.07695606   | 0.97664875   | 5885.496           | 6235.394          | 6097.597          | 5551.951                       | NM_011653                      | 1.06                  | -1.10             | -1.12             |                     | <i>Tuba1a</i>         | tubulin, alpha 1A                                                | 0007017 // microtubule-based process // inferred from electronic annotation//0008152 // metabolic process // inferred from electronic annotation |
| 0.11579136   | 0.37080194   | 13.883798          | 14.869218         | 14.763236         | 13.233142                      | NM_170597//NM_00645.0001202977 | 1.11                  | -1.12             | -1.12             |                     | <i>Cret2</i>          | cellular repressor of E1A-stimulated genes 2                     | 005114 // oxidation-reduction process // inferred from electronic annotation                                                                     |
| 0.001559537  | 7.75E-04     | 33.41498           | 39.426548         | 51.94689          | 35.05513                       | NM_009162                      | 1.18                  | -1.48             | -1.12             |                     | <i>Scg5</i>           | secretogranin V                                                  | 0006810 // transport // inferred from electronic annotation//0006886 // intracellular protein transport // inferred from direct assay//0007218   |
| 0.0675284    | 0.02617646   | 259.37936          | 280.8956          | 406.44058         | 248.93655                      | NM_001099774                   | 1.08                  | -1.63             | -1.13             |                     | <i>Krtap17-1</i>      | keratin associated protein 17-1                                  |                                                                                                                                                  |
| 0.7924486    | 0.6431704    | 120.54288          | 143.55479         | 147.13474         | 127.162674                     | NM_016866//NM_00648.0002123031 | 1.19                  | -1.16             | -1.13             |                     | <i>Skp39</i>          | serine/threonine kinase 39                                       | 0001933 // negative regulation of protein phosphorylation // inferred from direct assay//0006468 // protein phosphorylation // not recorded//    |
| 0.5230976    | 0.005739873  | 309.65298          | 326.20502         | 338.36047         | 288.9452                       | NM_026844//NM_00551.00070E-04  | 1.05                  | -1.17             | -1.13             |                     | <i>Cm2</i>            | CD4 assembly mitochondrial protein 2                             |                                                                                                                                                  |
| 0.46572787   | 0.43188995   | 2822.9985          | 2983.1397         | 2988.9175         | 2642.2893                      | NM_011327//NM_01124.000789655  | 1.06                  | -1.13             | -1.13             |                     | <i>Scp2</i>           | sterol carrier protein 2, liver                                  | 0006637 // acyl-CoA metabolic process // traceable author statement//0006694 // steroid biosynthetic process // not recorded//0006701 // p       |
| 0.9860367    | 0.44730213   | 53.07649           | 62.51307          | 65.57573          | 55.15674                       | NM_016662//NR_87349.000125412  | 1.18                  | -1.19             | -1.13             |                     | <i>Mod3</i>           | Max dimerization protein 3                                       | 0006351 // transcription, DNA-templated // inferred from electronic annotation//0006355 // regulation of transcription, DNA-templated // inf     |
| 0.005637219  | 0.08278733   | 57.3333            | 66.9638           | 60.187172         | 59.00381                       | NM_001113478//NM_0003351502    | 1.17                  | -1.02             | -1.13             |                     | <i>Frr1</i>           | ferric-chelate reductase 1                                       | 0006810 // transport // inferred from electronic annotation//0055114 // oxidation-reduction process // inferred from electronic annotation       |
| 0.003472009  | 0.90408813   | 102.89054          | 120.43201         | 107.66417         | 106.05429                      | NM_001301407//NM_30.0007864923 | 1.17                  | -1.02             | -1.14             |                     | <i>Tspan33</i>        | tetraspanin 33                                                   | 0045747 // positive regulation of Notch signaling pathway // not recorded//0051604 // protein maturation // inferred from mutant phenotype,      |
| 0.1061421    | 0.4775329    | 11.898493          | 13.12598          | 12.987037         | 11.551271                      | NM_175488//NM_00651.0002101363 | 1.10                  | -1.12             | -1.14             |                     | <i>Ccd38</i>          | coiled-coil domain containing 38                                 |                                                                                                                                                  |
| 0.9901541    | 0.19400911   | 45.44407           | 51.24861          | 56.275387         | 44.9879                        | NM_007662                      | 1.13                  | -1.25             | -1.14             |                     | <i>Cdh15</i>          | cadherin 15                                                      | 0007155 // cell adhesion // inferred from electronic annotation//0007156 // homophilic cell adhesion via plasma membrane adhesion molecule       |
| 7.41E-04     | 0.08986641   | 1001.4492          | 724.69794         | 580.5746          | 635.4509                       | NM_033563//NM_00645.0009038049 | -1.18                 | 1.09              | -1.14             |                     | <i>Klf7</i>           | Kruppel-like factor 7 (ubiquitous)                               | 0006351 // transcription, DNA-templated // inferred from electronic annotation//0006355 // regulation of transcription, DNA-templated // inf     |
| 0.038364775  | 0.5657878    | 7.312391           | 8.018694          | 7.751234          | 6.9740005                      | NM_177162                      | 1.10                  | -1.11             | -1.15             |                     | <i>Tmprss11g</i>      | transmembrane protease, serine 11g                               | 0006508 // proteolysis // inferred from electronic annotation                                                                                    |
| 0.5911136    | 0.47230577   | 67.01783           | 81.80634          | 89.667046         | 70.985016                      | NR_015249                      | 1.22                  | -1.26             | -1.15             |                     | <i>Eloha2</i>         | ethanol decreased 2                                              |                                                                                                                                                  |
| 0.5868689    | 0.63585263   | 8.800447           | 10.484583         | 10.233674         | 9.079129                       | NM_177744//NM_00551.000237379  | 1.19                  | -1.13             | -1.15             |                     | <i>Scp12</i>          | serine/arginine-rich splicing factor 12                          | 0000381 // regulation of alternative mRNA splicing, via spliceosome // inferred from electronic annotation//0000395 // mRNA 5'-splice-site rec   |
| 0.9555525    | 0.048695326  | 39.95345           | 44.094017         | 45.47682          | 38.13308                       | NM_016982//NM_01698.494E-04    | 1.10                  | -1.19             | -1.16             |                     | <i>Vpreb1//Vpreb2</i> | pre-B lymphocyte gene 1//pre-B lymphocyte gene 2                 | 0000902 // cell morphogenesis // inferred from genetic interaction//0002377 // immunoglobulin production // inferred from genetic interactio     |
| 0.5459284    | 0.20049705   | 28.868834          | 38.72149          | 36.402557         | 33.1805                        | NM_001290397//NM_0007991966    | 1.34                  | -1.10             | -1.17             |                     | <i>Mylb1</i>          | myoblastin oncogene 1                                            | 0006351 // transcription, DNA-templated // inferred from electronic annotation//0006355 // regulation of transcription, DNA-templated // inf     |
| 0.5671585    | 0.00856795   | 398.17203          | 548.8051          | 482.23813         | 467.35214                      | NM_001294302//NM_01.0003081897 | 1.38                  | -1.03             | -1.17             |                     | <i>Preb</i>           | prolactin regulatory element binding                             | 0006351 // transcription, DNA-templated // inferred from electronic annotation//0006355 // regulation of transcription, DNA-templated // not     |
| 0.47870213   | 0.2193896    | 300.20813          | 347.8457          | 348.97882         | 281.4759                       | NM_009293//NM_00101818157      | 1.16                  | -1.24             | -1.24             |                     | <i>Sts</i>            | steroid sulfatase                                                | 0006629 // lipid metabolic process // inferred from electronic annotation//0007565 // female pregnancy // inferred from electronic annotation    |
| 1.76E-04     | 0.49507868   | 7399.8096          | 7760.3833         | 6742.2266         | 6219.299                       | NM_011125//NM_00648.0008738595 | 1.05                  | -1.08             | -1.25             |                     | <i>Ptp</i>            | phosphotyrosyl transfer protein                                  | 0006629 // lipid metabolic process // inferred from electronic annotation//0006810 // transport // inferred from electronic annotation//0006     |
| 0.522295     | 0.22264111   | 32.784462          | 45.97425          | 41.877045         | 36.10311                       | NM_001103182//NM_31.000214569  | 1.40                  | -1.16             | -1.27             |                     | <i>Lin9</i>           | lin-9 homolog (C. elegans)                                       | 0006351 // transcription, DNA-templated // inferred from electronic annotation//0007049 // cell cycle // inferred from electronic annotation//,  |
| 0.32234672   | 2.97E-04     | 28.481337          | 75.41425          | 47.716915         | 59.164722                      | NM_009140                      | 2.65                  | 1.24              | -1.27             |                     | <i>Cxcl2</i>          | chemokine (C-X-C motif) ligand 2                                 | 0001975 // response to amphetamine // inferred from electronic annotation//0002237 // response to molecule of bacterial origin // inferred fr    |
| 0.24736327   | 0.50651183   | 24.590448          | 32.157936         | 29.573622         | 25.206678                      | NM_001290779//NM_31.001707604  | 1.31                  | -1.17             | -1.28             |                     | <i>Zfp879</i>         | zinc finger protein 879                                          | 0006351 // transcription, DNA-templated // inferred from electronic annotation//0006355 // regulation of transcription, DNA-templated // not     |
| 0.043703277  | 0.7279481    | 55.93547           | 72.03841          | 61.92084          | 56.35559                       | NM_026637//NM_02663.0006108716 | 1.29                  | -1.10             | -1.28             |                     | <i>Rwd4d</i>          | RWD domain containing 3                                          | 003208 // negative regulation of NF-kappaB transcription factor activity // not recorded//003235 // positive regulation of protein sumoylatio    |
| 2.15E-04     | 0.05562703   | 322.78778          | 394.3657          | 308.6342          | 293.3602                       | NM_001033272//NM_0002134426    | 1.22                  | -1.05             | -1.34             |                     | <i>Spot13</i>         | spermatogenesis associated 13                                    | 0016477 // cell migration // not recorded//0030032 // lamellipodium assembly // not recorded//0030334 // regulation of cell migration // not     |
| 0.10320588   | 0.028439551  | 40.14017           | 60.255722         | 47.371956         | 44.777042                      | NM_013738//NM_00651.0003471293 | 1.50                  | -1.06             | -1.35             |                     | <i>Plek2</i>          | plekstrin 2                                                      | 0035556 // intracellular signal transduction // inferred from electronic annotation                                                              |
| 0.45284718   | 0.0739012    | 37.68251           | 59.952892         | 48.501804         | 44.39286                       | NM_009100                      | 1.59                  | -1.09             | -1.35             |                     | <i>Rpn</i>            | ribonucleoprotein                                                |                                                                                                                                                  |
| 0.1615148    | 0.5074813    | 685.0561           | 814.30096         | 764.7367          | 601.46423                      | NM_001081322//NM_0003057414    | 1.19                  | -1.27             | -1.35             |                     | <i>Myp5c</i>          | myosin VC                                                        | 0008152 // metabolic process // inferred from electronic annotation//0032254 // establishment of secretory granule localization // not recorde   |
| 0.0399295    | 9.96E-05     | 73.79068           | 138.40205         | 83.03101          | 101.89759                      | NM_019810                      | 1.88                  | -1.23             | -1.36             |                     | <i>Slc5a1</i>         | solute carrier family 5 (sodium/glucose cotransporter), member 1 | 0001656 // melanogenesis development // inferred from mutant phenotype//0006810 // transport // inferred from electronic annotation//0006        |
| 0.5889784    | 0.049493894  | 94.72826           | 112.03129         | 113.71745         | 80.16662                       | NM_201638                      | 1.88                  | -1.41             | -1.40             |                     | <i>Mett14</i>         | methyltransferase like 14                                        | 0000398 // mRNA splicing, via spliceosome // not recorded//0006139 // nucleobase-containing compound metabolic process // inferred from e        |
| 0.004151421  | 0.21870469   | 27.880014          | 37.659985         | 30.800669         | 26.246265                      | NM_019514//NM_20711.6.26E-04   | 1.35                  | -1.16             | -1.43             |                     | <i>Astin2</i>         | astrotactin 2                                                    | 2000009 // negative regulation of protein localization to cell surface // inferred from direct assay                                             |
| 0.14543886   | 0.75992215   | 94.96745           | 135.1971          | 116.40971         | 92.20429                       | NM_006504243//NM_0003929869    | 1.42                  | -1.26             | -1.47             |                     | <i>Tmem156</i>        | transmembrane protein 156                                        |                                                                                                                                                  |
| 7.40E-04     | 0.21091159   | 80.28159           | 109.415375        | 85.37532          | 74.47691                       | NM_010780                      | 1.36                  | -1.15             | -1.47             |                     | <i>Cm1</i>            | chymase 1, mast cell                                             | 0006508 // proteolysis // not recorded//0006518 // peptide metabolic process // inferred from electronic annotation//0016485 // protein pro      |
| 0.86537766   | 0.00902173   | 65.09017           | 70.67845          | 40.061073         | NM_010861//NM_00651.0005792308 | 1.09                           | -1.09                 | -3.33             | -1.76             |                     | <i>Myz</i>            | myosin, light polypeptide 2, regulatory, cardiac, slow           | 0002026 // regulation of the force of heart contraction // not recorded//0003007 // heart morphogenesis // inferred from genetic interaction//   |
| 0.7703997    | 0.001061831  | 15.179602          | 79.0113           | 33.033127         | 43.647808                      | NM_203320                      | 5.21                  | 1.32              | -1.81             |                     | <i>Cxcl3</i>          | chemokine (C-X-C motif) ligand 3                                 | 0002690 // positive regulation of leukocyte chemotaxis // not recorded//0006935 // chemotaxis // inferred from electronic annotation//0006       |
