# Supplementary figures and images for: Glutathione reductase deficiency alters lung development and hyperoxic responses in neonatal mice
Source: PubMed Central journal article supplement — Redox Biol. 2020 Nov 13;38:101797. doi: 10.1016/j.redox.2020.101797 (PMC7708869; doi:10.1016/j.redox.2020.101797), 2020-11-13

Figure S1.

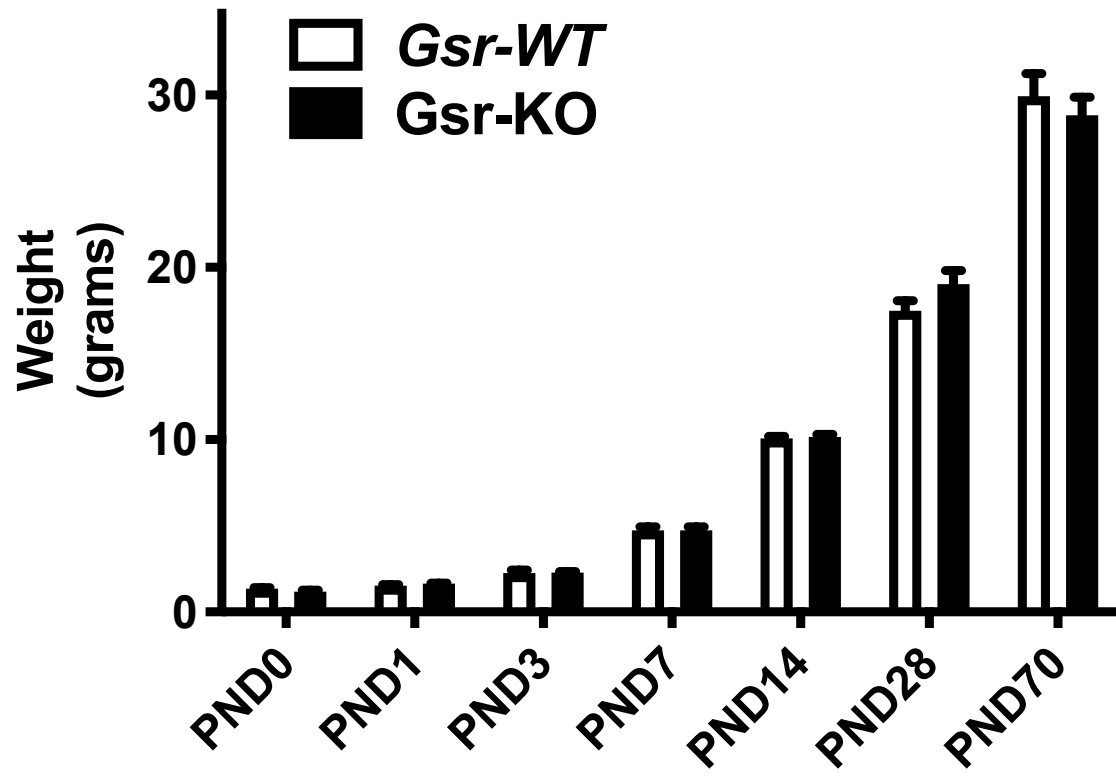

Figure S2.

A

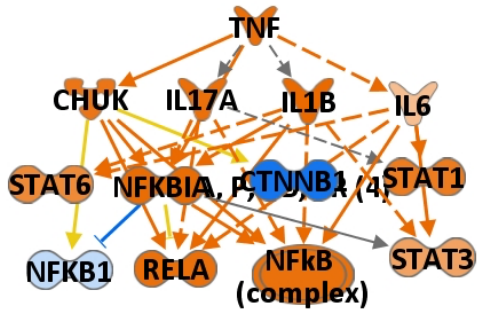

B

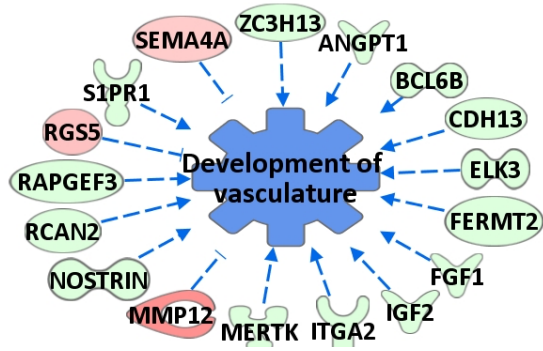

Supplement: mmc9.pdf [file mmc9.pdf]
